# Supplementary material
Source: publisher figshare collection journal article supplement (https://acs.figshare.com/ndownloader/files/22775540)
Supplement: Supplementary file 1 [file 22775540]

## Sheet: Supporting Data 2
Protein_ID	B1_ENM1_L	B1_ENM1_H	B1_ENM2_L	B1_ENM2_H	B2_ENM1_L	B2_ENM1_H	B2_ENM2_L	B2_ENM2_H	B3_ENM1_L	B3_ENM1_H	B3_ENM2_L	B3_ENM2_H	B4_ENM1_L	B4_ENM1_H	B4_ENM2_L	B4_ENM2_H	B5_ENM1_L	B5_ENM1_H	B5_ENM2_L	B5_ENM2_H	B6_ENM1_L	B6_ENM1_H	Correlation with cytotoxicity
1433B_HUMAN	0.902493	0.85995	1.00397	0.987181	1.03465	0.972274	1.05183	0.959587	1.00941	0.860447	0.889918	0.837326	0.779624	0.499646	0.941968	0.985373	0.881606	1.08115	0.873404	0.914188	1.19973	0.987603	0.564581
1433E_HUMAN	0.971433	0.926682	1.03476	0.974468	1.03407	0.950043	1.02083	0.966324	1.00401	0.890769	1.01056	0.970506	0.817801	0.551428	0.940185	1.02055	0.88733	0.960832	0.820647	0.879741	0.995298	0.842176	0.413641
1433F_HUMAN	0.956863	0.906637	1.01006	0.987761	0.942299	0.919026	0.961725	1.01204	0.847912	0.890765	0.931653	0.909698	0.75096	0.620692	0.981408	1.01698	0.805995	1.02395	0.810589	0.868713	1.01617	0.876315	0.455627
1433G_HUMAN	0.943843	0.904211	1.04019	1.00097	1.00108	1.00894	1.03323	1.02361	0.954316	0.955583	0.961713	0.99378	0.940958	0.675403	1.12086	1.1362	0.965123	1.08472	0.945555	1.05902	1.13627	0.89721	0.461245
1433T_HUMAN	0.906912	0.864858	0.997126	0.976476	1.05814	0.976603	0.990314	1.01859	0.99556	0.934617	0.948945	0.853474	0.768578	0.611513	0.878713	0.976989	0.767953	0.979045	0.820088	0.832077	1.03787	0.807926	0.40392
1433Z_HUMAN	0.91939	0.891595	0.981157	0.961005	0.992057	0.930963	0.986888	0.956448	0.946455	0.922324	0.958529	0.912319	0.794761	0.508382	0.925755	1.03712	0.880898	1.03488	0.808697	0.841687	0.992258	0.881068	0.513742
2A5D_HUMAN	1.04905	0.936837	1.26096	1.00589	0.991752	1.02557	0.995853	0.858564	1.04489	0.87544	0.557701	0.708487	0.596976	0.528349	0.911104	0.955378	0.97027	0.958208	0.609477	0.495391	0.695305	0.728419	0.633766
2A5G_HUMAN	1.22908	1.0853	0.944361	1.14384	0.941804	0.776277	1.02672	0.824438	0.84495	0.850515	0.841119	1.17338	1.03464	0.734256	0.880448	0.771107	0.940605	0.929837	0.825157	0.830884	0.850943	0.833269	0.124018
2AAA_HUMAN	0.995007	0.900566	1.03579	0.969691	1.00825	0.94686	0.99369	0.929248	0.97194	0.946551	0.944604	0.895317	0.838103	0.826588	0.973549	1.02206	0.868108	0.995389	0.793631	0.780679	0.921598	0.877991	0.475852
2AAB_HUMAN	1.13881	1.00464	1.13922	1.06858	1.25435	0.926312	1.07816	0.965399	0.994637	0.920239	0.996097	1.15646	0.987755	1.03743	1.03792	1.04219	0.893778	0.990555	0.876182	0.540391	0.937155	0.951746	0.105454
2ABA_HUMAN	0.948525	0.920462	1.0052	0.934398	1.0052	0.924755	0.961914	0.958534	1.01809	1.07058	1.09278	1.08408	0.865068	0.959624	0.970009	1.11759	0.980743	1.05439	0.826017	1.00076	0.948908	0.979268	-0.159449
3BP1_HUMAN	0.901811	0.950534	0.820842	0.876554	0.974125	0.821285	1.03986	1.0251	1.06624	1.05332	0.835791	0.895276	0.713326	0.71648	0.869895	0.953777	0.840295	0.953219	0.716303	0.796066	0.900325	0.963738	0.435394
3HIDH_HUMAN	1.18527	1.25655	0.92059	1.16052	1.03828	1.08367	1.04581	1.05026	1.14431	1.33629	0.983027	1.22972	1.75319	2.57201	1.18817	1.15639	1.08994	0.913289	1.05847	1.16628	1.0129	1.1262	-0.404456
3MG_HUMAN	0.934209	1.01012	1.01203	0.993778	0.902194	0.885936	0.931013	0.859638	0.963864	1.17066	1.16956	1.1462	0.75396	0.726882	0.826433	0.872588	0.897161	1.12778	0.861139	1.20558	0.742434	0.887957	-0.297828
4F2_HUMAN	1.14777	1.20755	1.19118	1.25992	1.23107	1.38816	1.21954	1.16414	1.3432	1.17503	1.12343	1.12756	1.08186	0.843008	1.0172	0.977449	1.01421	0.981239	1.09282	0.755581	1.01703	1.01693	0.136322
6PGD_HUMAN	0.922995	0.874624	1.04678	0.948172	1.01955	0.964115	1.00539	0.917131	1.05822	1.01174	0.942758	1.0099	0.693051	0.451945	0.91454	1.00717	0.826689	0.985743	0.812946	0.556191	0.899556	0.804651	0.357958
6PGL_HUMAN	0.982393	0.916535	0.966645	0.912947	0.972225	0.889012	1.00197	0.896072	1.05052	0.988895	1.00873	1.02324	0.704772	0.431754	0.922832	1.00022	0.786176	0.938079	0.660636	0.79085	0.863254	0.883068	0.311606
A16A1_HUMAN	1.05504	0.998881	1.10199	0.902539	0.79393	0.565803	0.723886	0.791186	0.787454	0.559985	0.765681	0.83535	1.00739	0.882066	1.05998	1.15433	1.01857	1.06946	0.758406	0.690048	1.04497	0.8029	0.492506
A2MG_HUMAN	1.0448	1.01475	0.845796	1.00745	0.980771	1.00555	0.946546	0.724741	1.05252	0.827026	1.12716	1.23903	0.942436	1.20852	0.858538	0.949236	1.21746	1.12706	1.24424	1.31744	1.0305	1.13707	-0.476208
AAAS_HUMAN	1.19544	1.13219	1.00336	1.01256	0.845583	0.767855	1.09909	1.05105	0.987818	0.863415	1.05267	0.898517	1.25901	0.920067	1.15705	1.10215	1.37592	1.14743	1.37205	1.2188	1.16581	1.22868	0.330002
AAAT_HUMAN	1.07218	1.24418	1.22235	1.20461	1.01785	1.00967	1.00323	0.99708	0.933606	0.653655	0.911958	0.948576	0.993722	0.749716	1.0786	1.00199	1.00865	0.803758	0.91385	0.660776	0.929482	1.0073	0.447095
AAKG1_HUMAN	0.903075	0.540844	0.991505	0.994953	0.913921	0.74843	1.01187	0.771589	0.787474	0.990489	1.27228	1.28874	0.91818	0.946916	0.985142	0.819799	0.981758	1.1316	0.832884	0.701029	0.991511	0.89026	-0.387839
AATF_HUMAN	1.23745	1.26173	1.14906	1.26312	1.27004	1.54558	1.49045	1.43258	1.20793	1.31772	1.29193	1.4209	1.01473	1.23295	0.843062	0.743438	1.10014	0.839872	1.40989	1.55093	1.11567	1.2911	-0.525478
AATM_HUMAN	1.21573	0.963231	1.02323	1.02834	1.11292	1.01923	1.05466	0.92891	1.27661	1.25969	1.79975	1.7487	0.984973	1.52273	0.970689	0.881188	1.06032	0.853354	0.842269	1.01179	0.984972	1.10789	-0.772218
AB1IP_HUMAN	0.979602	0.868947	1.00124	0.896645	0.981258	0.950132	0.953717	1.01837	0.995451	1.02936	0.93192	0.897161	0.682881	0.533755	0.942284	1.03417	0.809096	0.931557	0.65784	0.697682	0.97324	0.937483	0.447685
ABCD1_HUMAN	0.981784	0.977173	0.780458	0.850947	1.06416	1.25739	1.10319	1.01805	0.813291	0.770246	0.552045	0.795802	1.07807	0.856976	1.23121	0.960695	1.14955	0.911412	1.00045	0.468708	1.22222	1.10661	0.539641
ABCD3_HUMAN	1.10487	1.0357	1.01119	1.02767	0.98945	0.99536	0.949561	0.917955	0.859464	0.953761	0.837961	0.649385	1.00376	0.713906	1.066	1.01031	1.10532	1.00388	1.17012	0.629836	1.09396	0.998096	0.696249
ABCE1_HUMAN	0.989013	0.908514	0.860772	0.952335	0.973838	0.882321	0.913914	0.918839	0.936949	0.864171	0.865099	0.850684	0.872742	0.612884	0.955482	1.00571	0.839182	0.968272	0.716321	0.637903	0.901876	0.8844	0.658711
ABCF2_HUMAN	0.901267	0.873946	0.767152	0.848321	0.93433	0.869857	0.804593	0.844313	0.802469	0.713539	0.59495	0.834597	0.921615	0.660744	0.937355	0.956675	1.00167	0.973251	0.818892	0.714739	0.810306	0.876856	0.721382
ABCF3_HUMAN	0.982194	1.07466	0.607039	0.927905	0.816396	0.708687	0.989801	1.01919	0.694759	1.20954	1.19393	1.1201	0.75397	1.01068	0.900623	0.876525	1.17657	1.04859	0.671536	0.471679	0.916833	0.835247	-0.103342
ABD12_HUMAN	1.12907	1.16898	0.932876	1.10675	0.962443	0.943857	0.97693	0.923592	1.01745	0.767794	0.98658	1.03294	1.10559	1.05217	1.06212	1.02887	1.10091	0.904217	0.88445	0.657345	0.96411	1.04593	0.25167
ABHDA_HUMAN	1.10027	1.23789	1.11622	1.15763	1.02202	1.08079	1.09582	1.11408	1.4288	1.24253	1.28201	1.4548	1.61956	2.78609	1.12644	1.0205	1.30986	1.05032	1.0823	1.1944	1.18434	1.32356	-0.532001
ABHDB_HUMAN	1.03353	1.3307	0.972067	1.25031	1.17014	1.28645	1.23347	1.15064	1.13691	1.28029	1.11041	1.55389	1.82618	2.36088	1.27969	1.00503	1.33651	1.022	0.835455	0.884853	1.00765	1.12575	-0.408053
ABHGA_HUMAN	1.02353	1.00573	0.888526	0.953032	1.06261	1.00275	1.07713	0.952037	0.867857	0.636152	0.741465	0.509959	1.10705	0.855879	1.05544	0.960205	1.04272	0.751676	0.873684	0.440149	0.995001	1.0732	0.651137
ABI1_HUMAN	1.02352	0.974783	1.03518	0.973557	0.995023	1.07216	1.09472	1.02954	1.08399	1.0069	0.731154	1.03351	0.941023	1.01803	0.924645	0.986219	0.874989	0.984078	0.935728	1.16875	1.09476	0.965547	0.0964119
ABR_HUMAN	0.994859	1.14758	1.17949	1.10962	0.914924	0.878216	0.994507	0.91406	0.74292	0.811974	1.06419	0.983403	1.07635	0.736026	1.29175	1.20664	0.976497	1.09599	0.856726	0.96455	1.0051	1.04241	0.407215
ABRAL_HUMAN	1.02616	0.934041	1.12157	0.923562	0.976072	0.79866	0.997254	0.844971	1.13214	1.04139	1.17201	1.12102	0.606531	0.343712	0.926893	1.02437	0.85579	1.08231	0.747209	0.965649	0.809075	0.712527	0.154313
ACAD9_HUMAN	1.18968	1.22182	1.04503	1.09568	1.09586	1.09601	1.10862	1.02973	1.23509	1.34198	1.20565	1.19234	1.15953	1.29254	1.0892	1.05154	1.13879	0.980196	1.00601	0.804351	1.20877	1.27228	-0.207725
ACADM_HUMAN	1.20267	1.20528	1.17459	1.21819	1.14936	1.24451	1.16245	1.22477	1.32549	1.33116	1.31089	1.51676	1.53028	1.91991	1.14766	1.04449	1.19729	0.991071	1.10811	1.30384	1.11387	1.20218	-0.691978
ACADS_HUMAN	1.18271	1.19622	1.12032	1.07276	1.13234	1.22466	1.19964	0.967352	1.2926	1.56609	1.33279	1.48541	1.52031	1.64969	1.34092	1.07252	1.31983	1.09279	1.22562	1.29915	1.18879	1.19877	-0.59307
ACADV_HUMAN	1.04794	1.16625	0.968987	1.05177	1.0634	1.16031	1.05286	1.07775	1.37318	1.32284	1.2485	1.35861	1.43216	1.65865	1.11666	1.03828	1.1473	1.00277	1.0903	1.26953	1.08982	1.2027	-0.626682
ACBP_HUMAN	0.979491	0.886616	1.01116	0.964105	1.03376	0.86678	1.03939	0.969305	0.879773	0.811184	0.931802	0.872487	0.703835	0.463024	0.955619	1.11512	0.837134	1.08063	0.716898	0.873604	0.936976	0.823971	0.549803
ACDSB_HUMAN	1.19812	1.04994	1.07949	1.1454	0.960704	1.17941	1.33626	1.21838	1.13495	1.29472	1.66396	1.72584	1.53118	2.1528	1.43132	1.20923	1.36185	1.14623	1.29202	1.49816	1.09675	1.15045	-0.736971
ACINU_HUMAN	1.05429	1.00949	1.05286	1.00686	1.00188	1.14404	0.959051	1.04889	1.0994	0.963345	1.05737	1.15183	1.20578	1.15806	1.03025	0.960594	1.03179	0.957014	1.21348	1.31208	1.1723	1.16811	-0.486458
ACL6A_HUMAN	0.972781	1.0173	0.981403	1.04406	1.03106	1.1309	1.00332	1.088	1.0355	0.995295	1.05723	1.01083	1.06941	0.972388	0.996218	0.925572	1.02917	0.940823	1.06859	1.15486	1.06833	1.11384	-0.242703
ACLY_HUMAN	0.904753	0.881377	0.905209	0.890376	0.953206	0.88151	0.929049	0.875021	0.852105	0.871239	0.852311	0.842686	0.758738	0.768506	0.942172	0.972773	0.887594	0.952818	0.728285	0.538064	0.937216	0.943119	0.529004
ACOC_HUMAN	0.912176	0.915311	0.999618	0.918474	0.958513	0.886394	0.996926	0.921928	1.01878	0.620167	1.01048	1.18583	0.715382	0.543384	0.952975	0.968604	0.81169	0.968063	0.846351	0.788259	0.885522	0.864954	0.139526
ACON_HUMAN	1.16047	1.21004	1.14569	1.16049	1.12409	1.18915	1.11766	1.15284	1.29081	1.16592	1.07398	1.00836	1.35157	1.48296	1.0914	1.00918	1.18214	1.03083	1.02614	0.942855	1.12275	1.20813	-0.0750045
ACOT9_HUMAN	1.06309	1.17197	1.0332	1.07076	1.07227	1.15654	1.11759	1.05966	1.25425	1.24552	0.959444	1.04287	1.33101	1.51758	1.13072	1.00648	1.17342	0.980736	1.06833	0.814263	1.08456	1.17232	-0.0934715
ACOX1_HUMAN	0.998758	1.00382	0.938665	0.970142	1.05356	1.09654	0.890527	0.964327	1.10643	1.02518	1.03499	1.16586	1.18496	1.1712	1.06295	0.991752	1.04687	0.972419	1.15848	0.835482	1.07255	1.07617	-0.350308
ACOX3_HUMAN	1.13086	1.20239	1.01863	1.13697	0.901706	0.92346	1.01428	0.944321	1.06105	1.36897	1.20291	1.60069	0.937779	0.749719	1.0486	1.0267	1.01718	0.945753	1.02754	0.689862	0.977115	1.02018	-0.238579
ACPH_HUMAN	0.741441	0.847475	0.900244	0.848034	0.91318	0.881029	0.946456	0.874744	0.853094	0.796856	0.927663	0.841557	0.827606	0.542509	1.02033	1.09964	0.837313	0.938398	0.709834	0.585077	0.933803	0.957862	0.538729
ACPM_HUMAN	1.30573	1.38176	1.2745	1.44731	1.15164	1.31011	1.19576	1.23898	1.27702	1.23101	0.799769	1.27017	1.43322	2.03199	1.14871	1.09263	1.0745	1.00707	1.07844	1.0981	1.00042	1.30483	-0.249114
ACSL1_HUMAN	0.923267	0.882431	0.955305	0.845082	0.860365	0.907768	0.90833	0.909864	0.855937	0.787882	0.859692	0.85168	0.765553	0.744845	0.880768	0.890642	0.872114	0.877167	0.90871	0.713871	0.834879	0.81698	0.434745
ACSL3_HUMAN	1.19344	1.26228	0.991797	0.999459	0.983624	1.03676	0.923504	0.942061	1.16323	0.877838	1.00019	0.91477	1.01911	0.945975	1.02956	0.977384	1.10795	0.97069	1.04759	0.656207	0.92893	0.946142	0.388724
ACSL4_HUMAN	1.04489	0.921003	0.926589	0.961368	0.928362	0.910816	0.89595	0.899364	0.829921	0.724154	0.891055	0.822851	0.954077	0.607935	1.01368	0.950568	0.972822	0.940884	0.818724	0.479298	1.06483	1.04511	0.59633
ACTG_HUMAN	0.956207	0.935092	0.950482	0.92429	0.975353	0.922487	0.958232	0.943839	0.902215	0.853365	0.846778	0.840109	0.835791	0.608854	0.952786	0.990951	1.14708	1.01982	0.595719	0.761978	1.01536	0.903132	0.692542
ACTN1_HUMAN	0.918149	0.943075	0.934459	0.970086	1.04123	1.00107	1.06441	1.02399	0.936133	0.874571	0.929017	0.920209	0.844085	0.50002	0.998141	0.997088	1.01058	0.969912	1.02923	0.930261	1.00874	0.971346	0.53425
ACTN4_HUMAN	0.929113	0.982965	0.991882	1.02629	1.04906	1.02517	1.03602	1.01455	0.959718	0.863423	1.00845	0.901024	0.884008	0.483711	1.0101	1.00009	1.01057	0.963504	1.0373	0.952092	1.05698	1.02133	0.503753
ACTY_HUMAN	0.956692	0.992134	0.909541	0.86781	0.793797	1.17274	1.29117	1.08017	0.847427	0.997324	0.98547	1.07889	1.1403	1.15669	0.915565	0.963533	0.821139	0.921214	0.677111	0.812027	1.12421	1.04403	-0.160768
ACTZ_HUMAN	1.06189	0.966714	0.929773	0.921873	1.03773	0.847674	0.973178	0.876886	0.897268	1.07826	1.09563	1.27156	0.982233	1.34045	0.903692	1.00419	0.840107	0.975144	0.831956	0.794665	0.887871	0.913668	-0.565093
ACY1_HUMAN	1.3082	1.0146	0.931528	0.855784	1.01889	0.881686	0.773437	0.979383	1.15322	0.971012	0.756392	1.18121	0.793787	0.594515	0.861235	1.00741	0.842018	0.877728	0.61171	0.714606	0.917122	0.88082	0.289346
ADA10_HUMAN	0.987267	1.01395	1.00225	1.06751	1.15192	1.1904	1.15613	1.0752	1.05532	0.904885	1.0866	0.974031	1.04562	1.20918	0.952637	0.975767	1.05955	0.938536	0.925364	0.662028	0.938707	0.96387	-0.0422917
ADAS_HUMAN	1.04629	1.07026	0.984984	1.00517	1.05131	1.06211	0.974836	1.0444	1.04301	0.88576	0.994505	0.941795	0.984877	0.777067	0.994919	0.951371	0.99692	0.99148	0.989388	0.684472	1.02182	1.11264	0.477094
ADHX_HUMAN	0.924961	0.911923	0.913156	0.863255	1.02849	0.941854	1.05493	0.928254	1.07103	0.992574	0.876701	0.91297	0.68636	0.491329	0.891962	0.994685	0.809794	0.972094	0.717687	0.716888	0.822795	0.863578	0.471363
ADK_HUMAN	0.993278	0.876502	0.867342	0.997755	1.02498	0.899589	1.02881	0.942496	0.984069	1.28166	1.20453	1.29065	0.775171	0.465798	1.00188	1.00821	0.895721	1.01995	0.74283	0.857925	0.779211	0.835559	-0.0472028
ADNP_HUMAN	1.04446	1.04762	1.08761	1.15385	1.06455	1.24656	1.02535	1.11901	0.988435	0.438907	0.786606	0.531984	1.1209	0.844005	1.08315	1.07048	1.19041	0.933434	1.28617	1.03694	1.1363	1.23454	0.525417
ADPGK_HUMAN	1.03652	1.01117	0.934744	0.928801	0.996042	0.9028	0.919104	0.902758	0.951114	1.00413	0.987046	1.08608	1.15069	1.12451	1.04708	1.03488	1.20878	0.978998	1.15706	1.00475	0.960523	1.08671	-0.164491
ADPPT_HUMAN	0.973976	0.917825	0.98311	1.01453	0.92305	0.928369	0.875436	0.904593	0.999355	1.08239	0.897883	0.985448	0.723282	0.504177	0.998169	1.09109	0.662247	0.835792	0.691391	0.924748	0.830901	0.828984	0.258181
ADRM1_HUMAN	1.03128	0.981834	1.01751	1.06633	0.993409	1.03382	0.984804	0.933974	1.19802	1.02449	1.22745	1.21928	0.92678	0.853117	0.917028	1.01493	1.02331	1.00667	1.07531	1.10591	0.993118	1.15834	-0.375417
ADT2_HUMAN	1.15956	1.179	1.03442	1.11165	1.02092	1.17636	1.25218	1.06052	1.38688	1.15427	1.1249	0.936984	1.17906	1.22735	1.18062	1.05898	1.14566	1.03482	1.06906	0.831823	1.16517	1.06175	0.226615
ADT3_HUMAN	1.25524	1.27687	1.16561	1.19342	1.12758	1.18287	1.19731	1.13979	1.28335	1.12334	1.03634	0.889071	1.20461	1.26072	1.15742	1.03601	1.21143	1.01129	1.06638	0.7365	1.09321	1.12817	0.352728
AFG32_HUMAN	1.20785	1.26103	1.2766	1.18499	1.05249	1.176	1.19927	1.10957	1.35857	1.23726	1.18584	1.28232	1.27193	1.49085	1.09515	0.985749	1.07011	0.923331	0.878442	0.646283	1.10628	1.16601	-0.225302
AGAL_HUMAN	0.967229	0.896107	0.896514	1.00507	0.948814	0.979041	0.902439	0.855561	1.08275	1.01126	0.992203	1.09979	1.30876	1.41922	1.16656	1.13121	0.996268	1.02919	1.26867	1.54106	1.26618	1.18056	-0.349097
AGAP3_HUMAN	1.26103	1.11251	1.39054	0.980183	1.18454	1.11281	1.10924	0.955879	1.15715	0.949505	1.10431	1.06877	0.826603	0.851113	1.00786	1.00641	1.1033	0.956237	0.830393	0.790674	0.940702	1.4456	0.217903
AGFG1_HUMAN	0.994046	1.13989	1.09435	1.15561	1.08502	1.12134	1.13365	1.04654	0.944949	0.978783	0.990181	1.1384	0.855468	0.75619	1.10183	1.18974	0.75266	1.01579	0.810575	0.736242	1.0118	0.935656	0.256597
AGK_HUMAN	1.36864	1.25312	0.912534	1.2026	1.09007	1.0194	1.17916	1.12759	1.70531	1.37133	1.36303	1.38413	1.47257	1.23515	1.23005	1.23935	1.07905	0.945409	1.03402	0.953805	1.04199	1.0449	-0.144988
AGO2_HUMAN	0.960099	0.927107	0.787162	0.828911	0.927598	0.979421	1.03356	0.900859	0.886413	0.955425	0.918802	0.979075	0.962671	0.744175	0.99013	0.943195	0.946386	0.986004	0.851747	0.852622	0.944834	0.957409	0.362763
AHNK_HUMAN	0.82769	0.97991	0.900161	0.979739	1.10157	1.13643	1.05388	1.03903	1.10228	0.996408	1.07672	1.13219	1.05671	0.844073	0.944619	0.956672	0.991371	0.971128	1.06174	1.02504	0.921857	0.995876	-0.237876
AHSA1_HUMAN	0.96266	0.931807	0.977652	0.845718	0.90463	0.951384	0.969278	0.864588	1.0795	1.01006	0.984095	1.08837	0.739937	0.451986	0.913172	1.07956	0.898775	1.00638	0.862957	0.99262	0.892054	0.86121	0.23334
AIFM1_HUMAN	1.05236	1.04271	1.00889	0.98422	0.981243	1.09235	0.973991	1.04548	1.11639	1.04451	1.03645	1.11148	1.43136	1.70224	1.03745	0.983162	1.04234	0.947481	1.23385	1.2979	1.11512	1.18897	-0.506682
AIMP1_HUMAN	0.874797	0.931205	0.881445	0.946488	0.932527	0.952558	1.00013	0.988039	1.00248	1.0538	1.00338	1.06496	1.02571	0.987677	0.99232	1.06087	0.95211	1.03836	0.947265	1.28187	1.01272	0.975668	-0.275727
AIMP2_HUMAN	0.812331	0.876222	0.857116	0.864658	1.00014	0.894662	0.983369	0.974007	0.937126	0.938731	0.918332	0.875914	0.81524	0.959806	0.931529	1.00655	0.805985	0.918934	0.731223	0.765729	0.9137	0.906232	0.185559
AINX_HUMAN	0.932046	1.04768	1.08839	1.13863	0.968312	0.986638	0.917363	0.838709	0.871673	0.98276	1.14125	1.09473	0.73195	0.409691	0.938853	1.01427	0.941243	0.940508	1.01377	1.03531	1.27467	1.31093	0.111925
AIP_HUMAN	0.937722	0.908911	0.750457	0.918348	1.02954	0.931046	1.01609	0.98041	1.02588	0.894431	1.09202	1.05054	0.850669	0.528218	1.01429	1.038	0.933105	1.01026	0.872452	1.05825	0.883871	0.899745	0.206561
AK1A1_HUMAN	1.04509	1.05115	1.04279	1.03633	1.06576	0.901227	0.996732	0.968089	0.958332	0.795455	0.952203	0.912356	0.729716	0.467814	0.902008	1.00371	0.796404	0.934606	0.773783	0.769948	0.803203	0.815693	0.468284
AKAP1_HUMAN	0.965699	0.868099	0.918537	0.963052	1.00173	1.09042	0.958323	1.08101	1.15457	1.42687	1.32257	1.02026	1.1043	1.02967	1.56688	1.1281	1.09819	1.12883	1.00235	0.632275	0.864428	1.01903	0.0378058
AKAP8_HUMAN	1.16208	0.851705	0.585919	0.938912	1.09157	1.5861	1.12515	1.30907	1.40471	0.836701	0.956665	0.74048	1.78019	1.52498	0.910288	0.973008	0.863205	0.941699	1.05804	1.01715	1.0719	0.791454	-0.0626494
AKP8L_HUMAN	0.755348	1.10865	0.77615	1.03686	1.04661	1.06452	1.03718	1.04889	1.09321	1.02628	0.9566	0.927271	1.28038	1.13325	1.07501	0.791891	1.05362	0.912409	1.31697	1.47404	1.08888	0.992836	-0.199395
AL1B1_HUMAN	1.31496	1.25918	1.17504	1.15993	1.21971	1.31685	1.24203	1.18225	1.43645	1.28724	1.15238	1.29187	1.43456	1.71677	1.10579	1.02787	1.16136	0.96352	1.05798	1.11423	1.0012	1.21106	-0.408185
AL1L2_HUMAN	1.11364	1.23858	0.9939	0.981202	1.02696	1.17903	1.07726	1.02996	1.26249	1.19982	1.03532	1.4712	1.50046	1.5384	1.20281	0.964945	1.29	1.08535	1.11132	1.09326	1.12339	1.15023	-0.417222
AL5AP_HUMAN	1.43437	1.22228	1.29168	1.00473	0.934111	1.00569	0.950828	1.01001	1.16587	0.941623	1.10016	1.27346	0.931006	1.34489	1.07993	0.990386	1.00821	0.788167	0.755074	0.624804	0.834486	1.12266	-0.153269
AL9A1_HUMAN	1.03196	1.03882	1.12642	1.00128	1.06816	1.04484	1.0695	1.04567	1.07209	1.01793	0.789488	0.980033	1.04028	0.988219	1.00744	0.99536	0.91676	0.932235	0.813074	0.87157	0.853849	0.883475	0.355076
ALDH2_HUMAN	1.17443	1.26826	1.12375	1.18624	1.13224	1.27543	1.1936	1.12865	1.52911	1.45659	1.39296	1.43123	1.64762	1.8455	1.12728	1.09243	1.20412	0.974174	1.22751	1.38386	1.1404	1.23649	-0.628847
ALDOA_HUMAN	0.948049	0.927465	0.999996	0.982575	1.00331	0.91817	1.01766	0.968697	0.935628	0.852573	0.933684	0.905125	0.746677	0.472777	0.904586	0.988692	0.826366	0.958231	0.743241	0.743725	0.923233	0.865462	0.512992
ALDOC_HUMAN	0.791077	0.795232	0.883596	0.860447	0.954337	0.923168	0.982765	0.953094	0.992518	0.742156	0.932442	1.07948	0.822904	0.558876	0.982772	1.16997	0.768771	0.947129	0.70177	0.717985	0.922868	0.954511	0.301866
ALDR_HUMAN	0.829001	0.812328	0.864036	0.849983	1.03826	1.00717	1.13342	1.11083	0.929237	0.931583	0.93167	0.937167	0.739921	0.43702	0.906698	1.009	0.807984	1.00465	0.757044	0.747386	0.945205	0.874157	0.39263
AMPB_HUMAN	0.941138	0.872949	0.982051	0.906653	0.960873	0.900244	0.9474	0.892717	0.871629	0.895774	1.02062	0.951909	0.695046	0.39558	0.923855	0.999473	0.865307	0.983551	0.673663	0.583553	0.951253	0.828114	0.40302
AMPL_HUMAN	0.932628	0.955458	0.989684	0.945494	1.0036	0.979725	0.998131	1.0085	1.02362	0.944425	0.899637	0.816386	0.852358	0.758719	0.955591	1.01226	0.886369	0.950255	0.541364	0.496244	0.899884	0.888362	0.515193
AMPN_HUMAN	1.00858	1.08446	1.00998	1.03619	1.04956	1.09555	1.04904	1.01588	1.00155	0.849328	0.898976	0.91168	1.25196	1.146	1.03006	1.011	1.1098	1.0333	1.11786	0.92237	1.06364	1.07361	0.272643
AMRP_HUMAN	0.976757	0.954822	0.938759	0.942918	1.02472	1.07018	0.881667	1.0558	0.924345	0.743625	0.986773	1.1303	1.1341	1.58353	1.02208	0.955947	1.03164	0.945784	1.23491	1.21219	1.08772	1.15034	-0.509957
AN32A_HUMAN	0.916083	0.915741	0.97863	0.930185	0.894339	0.968476	0.937647	0.947332	1.02732	0.883058	0.996508	0.922846	0.780402	0.656862	0.918515	0.980151	0.884806	0.935019	0.852533	1.00528	0.991889	0.906902	0.293521
AN32B_HUMAN	0.977063	0.923995	0.965158	0.978038	1.04037	0.977674	1.00049	0.992731	1.0187	0.913208	0.928017	0.842403	0.789596	0.598027	0.940237	0.991978	0.856784	0.956245	0.836088	0.986956	0.915361	0.85651	0.526433
AN32E_HUMAN	0.956618	0.968889	0.914546	1.0357	0.882868	0.899675	0.917455	0.894712	1.11666	1.03065	0.903012	0.916015	0.949247	1.17904	0.95736	0.964925	0.959383	0.991765	0.874204	1.32589	0.883967	0.910008	-0.18771
ANGT_HUMAN	1.14792	1.00761	1.32693	1.19471	1.01679	0.822225	0.860132	0.846545	0.845384	1.12904	1.18669	1.17139	0.719781	1.15599	1.22054	1.20728	1.36666	1.11989	1.31756	1.18092	1.17815	1.16073	-0.144336
ANM1_HUMAN	0.856748	0.835043	0.853298	0.848909	0.908551	0.902945	0.921549	0.899948	0.911682	0.926689	0.933687	0.931312	0.746269	0.82465	0.971966	0.930623	0.967092	0.952512	0.951707	1.01668	0.905774	0.994573	0.0518182
ANM5_HUMAN	0.908074	0.906409	0.629409	0.84102	0.948502	0.873825	0.939962	0.903824	0.93495	1.00328	1.14303	1.04858	0.929199	1.10989	1.00057	1.03626	0.956273	1.0476	0.834224	0.859889	0.973023	0.970259	-0.286132
ANO6_HUMAN	0.977238	1.05968	1.02186	1.22384	1.01513	1.15212	1.05255	1.01547	1.10337	1.19466	0.995879	0.972254	0.96786	0.742665	0.994119	0.922117	0.998229	0.951774	0.950282	0.618762	1.07977	1.00586	0.297223
ANX11_HUMAN	0.931848	0.898499	0.972553	0.927571	0.972122	0.972828	0.946975	0.956373	1.06598	1.07355	0.968311	1.03832	0.881695	1.17606	0.823419	0.978124	0.782285	0.974405	0.768992	1.52116	0.820535	0.822459	-0.409604
ANXA1_HUMAN	0.959942	0.904803	1.00341	0.944815	0.978551	0.968607	0.985517	0.920584	1.00162	0.901464	0.941151	0.779894	0.789165	0.839527	0.865157	0.965272	0.774788	0.922585	0.779919	1.00971	0.855094	0.787342	0.255124
ANXA2_HUMAN	0.878781	0.962277	0.935737	0.983915	0.992442	1.00557	0.977177	0.984769	1.00186	0.921029	0.977736	1.00782	1.11021	1.1296	0.914384	0.914209	0.961676	0.953275	1.19597	1.30009	0.910401	0.985093	-0.454896
ANXA4_HUMAN	0.958153	0.933999	1.03482	1.02045	1.00747	0.936719	1.00376	0.961627	0.919838	0.868498	0.980784	1.00596	0.888526	1.12071	0.823401	0.975355	0.763475	0.945529	0.693841	1.12643	0.835541	0.814264	-0.317894
ANXA5_HUMAN	0.910426	0.853507	0.898031	0.872013	0.904794	0.847498	0.94334	0.818644	0.933069	0.849696	0.897264	0.841784	0.777127	0.847722	0.863138	1.00287	0.788415	0.995526	0.712195	0.755275	0.827247	0.819135	0.35922
ANXA6_HUMAN	0.945071	0.882341	0.999608	0.93466	1.03946	0.937568	1.02549	0.970582	0.968279	0.915037	0.976499	1.03788	1.01605	1.32576	0.888587	1.00283	0.760925	1.00234	0.766991	1.43855	0.853758	0.831001	-0.41709
ANXA7_HUMAN	0.911443	0.882916	0.880777	0.815726	0.986971	0.852799	0.910109	0.924024	0.968826	0.870444	0.95637	0.856185	0.906383	1.25394	0.938287	0.949287	0.779636	0.932308	0.737817	0.757968	0.833722	0.81818	-0.140967
AP1B1_HUMAN	0.950091	0.928567	0.950686	0.963656	1.01072	0.968293	0.974977	0.945811	0.905495	0.878095	0.93298	0.854431	0.744031	0.657523	0.957012	1.01284	0.869365	0.960708	0.805303	0.728242	1.02798	0.956315	0.564348
AP1G1_HUMAN	0.977866	0.899235	0.930199	0.921656	1.01196	0.951688	0.933102	0.905291	0.875295	0.912522	0.909008	0.905584	0.769741	0.634156	0.97819	1.00811	0.931619	1.03778	0.878054	0.798481	0.87331	0.84104	0.536925
AP1M1_HUMAN	1.05152	1.00106	0.829855	0.894209	1.0105	0.939769	1.00711	0.966094	0.848782	1.04213	0.810479	1.04755	0.583285	0.422178	0.820956	0.9501	0.84407	0.905875	0.665204	0.515523	0.845075	0.831572	0.352336
AP2A1_HUMAN	0.990783	0.982065	0.967279	0.953403	1.02233	1.01615	0.982478	0.979631	1.01385	0.971115	0.965086	0.88545	0.885907	0.77226	0.928621	0.948711	0.954426	1.00504	0.908822	0.696597	0.957647	1.01195	0.519751
AP2A2_HUMAN	0.950391	0.932439	0.956203	0.942549	0.994556	0.943849	0.937054	0.963046	1.01505	1.0401	1.06198	1.00346	0.881191	0.783419	0.953107	0.962934	0.975437	0.99008	0.855027	0.661545	0.935801	0.961691	0.204078
AP2B1_HUMAN	0.949068	0.949215	1.01558	0.994774	1.03641	1.02958	0.964519	0.952	0.970395	0.942391	0.943283	0.851518	0.873467	0.732313	0.96112	1.0033	0.911768	0.983256	0.899122	0.724621	0.986579	0.929663	0.589157
AP2M1_HUMAN	0.945484	0.985366	1.00348	0.888635	0.967865	0.988862	1.00124	0.964741	0.913095	0.811982	0.914297	0.790403	0.810352	0.668293	0.932722	0.915511	0.954402	0.961977	0.721918	0.547684	0.990453	1.0122	0.601722
AP2S1_HUMAN	1.22684	1.05281	1.12407	0.936564	1.04717	0.980503	1.00821	0.888484	1.14788	1.01189	1.03198	1.01913	0.926177	0.968041	1.00356	1.00801	1.09284	0.889374	0.738967	0.689863	0.923853	0.834178	0.225003
AP3B1_HUMAN	0.945175	0.893445	0.936179	0.900556	0.976635	0.877232	1.00351	0.945755	0.981756	0.965279	0.941912	0.959309	0.855172	1.11159	0.957202	1.09417	0.908585	1.02798	0.766056	0.69749	0.913883	0.890329	0.110878
AP3D1_HUMAN	0.92931	0.760721	0.830451	0.769605	0.896917	0.838049	0.943974	0.828691	0.922591	0.83401	0.996118	1.0073	0.757204	0.921039	0.793105	0.961689	0.937019	0.998453	0.779871	0.755326	0.872867	0.84593	-0.122891
AP3M1_HUMAN	0.864565	0.643155	0.646962	0.787564	0.859195	0.856173	0.843477	0.868747	0.918326	0.902716	0.807905	0.989299	0.798986	0.948266	0.948587	1.00785	0.88716	1.06897	0.73618	0.799405	0.940645	0.948807	0.0499091
APAF_HUMAN	1.5003	0.862754	1.21952	1.07926	1.24234	0.802165	1.23931	0.927857	0.62459	1.57789	0.963097	1.38679	0.952373	1.20956	0.939149	1.14587	0.996222	1.23353	0.990596	0.798425	0.996558	0.850045	-0.16082
APEX1_HUMAN	0.926391	0.927943	0.956745	0.956182	1.00416	0.943603	1.02042	1.00722	0.958228	0.971388	0.958963	0.938102	0.701753	0.387057	0.918842	1.03892	0.855151	0.960017	0.745769	0.660534	0.928944	0.821936	0.465769
API5_HUMAN	0.994227	0.952451	1.04002	0.978645	0.999435	0.98838	0.972008	0.99145	0.946423	0.847864	0.992697	0.865824	0.673428	0.336165	0.927268	0.943042	0.94361	0.914075	0.889657	0.763209	0.895178	0.999575	0.481152
APMAP_HUMAN	1.11156	1.08031	1.12334	1.09909	1.06163	1.12795	1.1668	1.08236	0.974563	0.889643	0.842738	0.864613	1.27239	1.32443	1.02048	1.00033	1.05995	0.847832	1.05098	0.848619	0.909639	1.05179	0.125939
APOBR_HUMAN	0.893817	0.959489	0.893326	1.04063	1.02519	1.07864	0.911359	1.02577	0.835048	0.868682	0.955455	0.909931	1.02275	0.829621	1.03851	1.05093	0.958066	0.972626	1.04933	1.0254	1.10317	1.05153	0.267652
APOC2_HUMAN	1.10296	1.01813	1.22649	1.16141	1.14651	1.23834	0.969958	1.17207	1.16589	0.944085	0.854711	0.987418	1.02702	1.2918	1.02723	0.94863	1.11757	1.08464	1.60574	1.87929	1.26675	1.16018	-0.180744
APT_HUMAN	0.983989	0.904601	0.987275	0.949493	0.944593	0.857378	1.03138	0.880094	0.989363	1.05408	1.04949	1.01536	0.789211	0.554121	0.9455	1.03918	0.847866	0.930864	0.730286	0.817159	0.835697	0.828466	0.25221
AQR_HUMAN	1.00144	0.990814	0.86687	1.02195	1.0294	1.05174	1.06978	1.08341	1.09116	1.35874	1.31969	1.31432	0.942829	0.724655	1.03232	0.910493	1.13261	1.06894	1.14232	0.987553	1.07088	1.09923	-0.282796
AR6P1_HUMAN	1.00317	0.951655	1.05844	1.00761	1.07657	1.20091	1.03789	1.03242	0.898068	0.751647	0.884891	0.760331	1.03109	1.09112	1.05822	1.02288	1.04473	0.919712	1.093	0.886103	1.11489	1.01961	0.332988
ARAP1_HUMAN	0.995128	0.92754	1.27134	0.958673	0.907848	0.986481	1.01103	0.900421	1.04641	0.784813	0.817372	0.915978	0.923051	0.753436	1.06093	1.21562	0.965149	0.98843	0.984601	0.918859	1.05404	1.20046	0.542169
ARBK1_HUMAN	1.03386	0.923047	0.826212	0.824868	0.87346	0.819924	0.919234	0.76734	0.8569	0.872387	0.930819	0.88177	0.702683	0.562771	0.850929	1.00968	0.861942	0.92523	0.722537	0.711947	0.888961	0.933059	0.455551
ARC1A_HUMAN	0.946015	0.885249	0.982651	0.916228	0.914244	0.868652	0.860521	0.836613	0.942335	0.888605	0.894	0.814847	0.771901	0.577799	0.99895	0.974251	1.00564	0.995359	0.960861	0.824375	0.938628	0.86899	0.641494
ARC1B_HUMAN	0.917068	0.909587	0.904182	0.86946	0.943861	0.820425	0.920569	0.87485	0.778477	0.738675	0.766485	0.785743	0.727516	0.539581	0.969316	0.966144	0.891278	0.94992	0.786183	0.603324	0.90781	0.891104	0.742863
ARF1_HUMAN	0.939447	0.980271	0.939802	0.879247	1.01378	0.953864	1.07027	1.0079	1.01327	0.92364	0.874368	0.878144	0.629907	0.368783	0.921895	0.972412	0.934624	1.01825	0.790295	0.704002	0.851216	0.812228	0.568279
ARF4_HUMAN	0.815161	0.876554	0.824273	0.946495	0.963278	0.999941	0.983554	1.00587	1.03976	1.02038	0.90699	1.00331	0.650641	0.588925	0.962633	0.973121	1.00654	1.06107	1.00203	0.986855	0.90136	0.791806	0.22825
ARF5_HUMAN	1.16191	1.27637	1.13853	1.03703	0.713907	0.786942	1.0947	1.00838	0.943271	0.789346	1.24484	1.30396	0.714484	0.362488	0.99331	0.936867	1.43029	1.23961	0.838444	0.910164	0.875658	0.861051	0.20216
ARF6_HUMAN	0.83222	0.937878	0.805237	0.873938	1.05877	0.981326	1.05634	1.04202	0.857539	0.870481	0.702893	0.797494	0.657586	0.494906	0.86571	0.846512	1.07025	0.98007	0.752141	0.489216	0.923102	0.876949	0.61307
ARFG2_HUMAN	1.10282	0.952939	1.04919	1.11381	0.961954	1.00185	0.974048	0.934567	1.06395	1.04275	1.1244	1.19332	0.829063	0.631677	0.899945	1.00099	0.899403	0.968815	0.834059	0.745763	1.13223	1.15571	0.0605544
ARFP1_HUMAN	0.814513	0.747723	0.388827	0.638015	0.995339	1.20257	1.21364	1.31846	0.87255	1.3322	1.32071	1.33605	0.812395	0.84849	1.01864	0.974526	1.77837	1.40533	1.30779	1.44203	1.00853	0.784217	-0.198031
ARHG1_HUMAN	1.08832	1.09628	1.05811	0.979313	0.964887	0.879527	0.981084	0.918915	0.920669	0.968438	1.04426	0.990041	0.902265	0.924476	0.906923	0.975286	0.907692	1.02316	0.776364	0.798267	0.952652	0.920591	0.15771
ARHG2_HUMAN	1.03996	1.01039	1.03915	1.00115	1.00123	0.949201	0.975932	0.923777	1.00293	1.05203	1.00378	0.975566	0.763556	0.855732	0.933083	0.982678	0.923844	0.9944	0.693607	0.645804	0.950273	0.941859	0.258592
ARHG6_HUMAN	1.08281	0.930554	1.00015	1.15252	0.941095	0.916292	0.99492	0.89426	1.03846	1.00804	1.04922	1.05993	1.00753	1.03296	1.04737	1.08399	0.950015	1.0394	0.820349	0.827623	0.938269	1.05925	0.0445365
ARHG7_HUMAN	1.06545	1.02019	0.812439	0.828261	1.14007	1.14808	1.12516	0.953244	0.954962	0.978778	1.10233	0.964623	1.05906	0.931955	1.10122	1.15853	0.901432	1.02755	0.896792	1.01826	0.981032	1.07172	0.152108
ARK72_HUMAN	1.06493	0.986489	0.922439	0.974905	0.987492	0.959364	1.11519	0.965889	0.88184	0.863215	0.981929	0.958256	0.911646	0.632936	0.9337	0.990289	0.896502	0.909059	0.645644	0.602686	0.861935	0.895929	0.426006
ARL1_HUMAN	0.993709	0.970217	0.85682	0.906894	0.894776	1.01063	0.95019	0.919471	0.825918	0.82181	0.995791	0.871469	0.825878	0.949316	0.961286	0.980131	1.01423	1.05545	0.952139	0.754973	0.939886	0.874798	0.238264
ARL8A_HUMAN	1.04419	1.15513	1.11919	1.18267	0.850528	1.43086	1.40293	1.29645	1.27143	0.989148	1.06688	0.880155	0.963295	1.41017	1.07025	1.07581	1.09446	1.07533	1.08543	0.955039	0.858411	1.05809	-0.00587736
ARL8B_HUMAN	1.07198	1.12616	1.09442	1.08646	1.00257	1.1548	1.07911	0.999073	1.19559	1.27763	0.916904	1.07931	1.17126	1.19028	1.04544	1.05722	1.00429	0.900125	1.15254	1.11258	0.974306	1.04619	-0.208714
ARMC8_HUMAN	1.05353	1.0755	0.907795	1.09848	0.989333	1.00607	0.970301	0.989644	0.969488	1.37076	1.26776	1.23653	1.09245	1.13609	1.22813	1.0522	1.20872	1.10211	1.10136	1.14321	1.00999	0.94827	-0.445842
ARMC9_HUMAN	1.02442	0.967182	1.00167	0.895364	0.928253	0.850529	0.952235	0.922226	1.15106	1.11737	1.42082	1.23396	0.707642	0.787792	1.11231	1.04533	0.812177	1.00511	0.749923	0.682513	0.822239	0.602837	-0.171488
ARP2_HUMAN	0.932476	0.8911	0.943058	0.897723	0.960491	0.845784	0.98021	0.917098	0.793427	0.783753	0.83797	0.725341	0.7277	0.482057	0.952378	0.987781	0.903172	0.995295	0.767745	0.67519	0.95054	0.840265	0.747864
ARP3_HUMAN	0.907653	0.879521	0.960943	0.943344	0.966861	0.896586	0.951537	0.916981	0.904272	0.816554	0.892443	0.836408	0.741467	0.525444	0.961726	0.977664	0.877566	0.999767	0.749014	0.591099	0.984056	0.918024	0.621838
ARP5L_HUMAN	0.878094	0.958955	0.734217	0.958111	0.846497	0.858526	0.924697	0.770566	0.927859	0.744598	0.903456	1.04361	0.901705	0.728283	1.06449	1.14066	0.9886	1.0633	0.866673	0.892642	0.830504	0.98982	0.326917
ARPC2_HUMAN	0.942526	0.863741	1.00805	0.947844	1.0224	0.942774	1.00655	0.964632	0.878251	0.815266	0.886547	0.788066	0.732809	0.552777	0.963641	1.01258	0.881422	1.01383	0.709413	0.533562	0.992109	0.921026	0.629147
ARPC3_HUMAN	0.983578	0.881073	1.01116	0.983802	1.00802	0.93971	0.923649	0.955355	0.900826	0.817177	0.836814	0.810309	0.814552	0.617887	0.96525	1.03781	0.838266	0.940501	0.750209	0.647046	0.941286	0.839237	0.668279
ARPC4_HUMAN	0.937335	0.835976	0.80552	0.823953	0.874402	0.825056	0.873236	0.830753	0.772829	0.755114	0.85391	0.784217	0.68707	0.481434	0.915541	0.968182	0.87265	1.00527	0.72712	0.564481	0.947117	0.848797	0.62513
ARPC5_HUMAN	0.827504	0.858998	0.842385	0.738043	1.06986	1.03035	1.05679	0.992202	1.06718	0.849583	0.822672	0.905899	0.78045	0.530513	0.949345	0.989739	0.878531	0.968877	0.781482	0.78313	0.937919	0.844669	0.5172
ARRB1_HUMAN	0.927316	0.849429	0.842677	0.917162	1.00466	0.88537	1.01496	0.964127	1.00929	0.9334	1.07702	0.97198	0.859614	0.710962	0.941366	0.974797	0.878533	1.09216	0.966802	0.903747	0.87385	0.944433	0.159187
ARRB2_HUMAN	0.844331	0.801739	0.874092	0.925966	0.949914	1.00418	0.970212	1.09045	0.946162	0.830744	1.12353	1.02045	1.03682	1.08132	1.09439	1.11121	0.761015	0.868753	0.814715	0.971352	1.04753	1.10455	-0.247163
ARSA_HUMAN	1.01657	0.91569	1.06224	0.93261	0.90968	0.846172	1.00826	1.00112	0.834375	0.789006	1.01437	1.31388	1.11151	1.54782	0.922361	0.989306	1.07498	1.05713	1.29096	1.37722	1.10834	1.17769	-0.567239
ARSB_HUMAN	0.861843	0.928523	0.912972	0.800792	0.945602	0.952697	0.984409	0.994603	0.846103	0.862388	0.958807	1.12557	1.21199	1.64306	1.04548	1.02462	0.976869	0.848545	1.15679	1.348	1.02316	1.08501	-0.518345
ASAH1_HUMAN	1.0336	1.13788	0.942319	1.20782	1.04861	1.18757	1.09011	1.11114	0.998078	1.14754	1.00141	0.992482	1.12412	1.23736	0.979382	1.0245	1.09204	1.09508	1.32062	1.36455	1.00271	1.16618	-0.284168
ASC_HUMAN	1.01574	0.912166	0.961561	0.841947	0.962652	0.848576	1.07872	0.927322	0.895137	0.849349	0.998506	0.961528	0.973319	1.35482	0.865122	0.997229	0.806589	0.913831	0.669747	0.764764	0.791847	0.803607	-0.232107
ASNA_HUMAN	0.965259	0.910167	0.798372	0.883196	0.967136	0.931372	0.974868	0.939116	1.02327	0.936273	0.898223	1.01869	0.740707	0.754334	0.839683	0.955708	0.845849	1.00116	0.7277	0.904895	0.942377	0.953114	0.189312
ASPH_HUMAN	1.02616	1.1092	1.09819	1.10111	0.903935	1.16363	1.01318	1.02194	1.06397	0.878408	0.901691	0.926526	1.02983	1.24985	1.03234	0.984927	1.05282	0.847885	1.07514	0.65954	0.968894	1.06106	0.0705996
ASSY_HUMAN	0.986086	0.914172	0.985904	0.958456	0.926945	0.940649	0.949263	0.920719	0.883246	0.801225	0.922783	0.842623	0.833489	0.532384	0.947911	0.998546	0.838721	0.995919	0.733534	0.664452	0.983096	0.954506	0.609455
AT131_HUMAN	1.22468	1.13196	0.878697	0.980572	0.897613	0.947636	1.00832	0.986612	1.00454	0.808732	0.668697	0.806972	1.10989	1.20419	1.10114	1.0223	1.07238	0.889062	0.878456	0.3263	0.858512	0.935476	0.416102
AT133_HUMAN	1.09561	1.12882	1.19502	1.16782	1.08286	0.998439	0.897634	0.951113	1.08647	1.03483	1.12067	1.07994	1.01015	0.944371	0.885025	0.966919	1.10393	0.999601	0.961195	0.68726	0.843926	1.06304	0.0234755
AT1A1_HUMAN	1.02193	1.08268	1.13524	1.09365	1.08145	1.19128	1.05116	1.0858	1.08932	0.841735	0.918764	0.787901	0.96746	0.854866	0.971729	0.956725	0.989403	0.979243	1.03601	0.711115	1.01382	1.04654	0.534817
AT1B1_HUMAN	1.03636	1.23217	1.14916	1.27004	1.04046	1.03061	1.12025	1.11484	1.21358	1.04767	1.03733	0.924065	1.04661	1.11253	1.21607	1.18269	1.08962	1.12139	1.19654	0.817161	1.01373	1.09953	0.441858
AT1B3_HUMAN	1.19025	1.13606	1.21255	1.21194	1.07223	1.084	1.09386	1.11407	1.14505	0.948737	0.947427	0.903946	1.03063	0.723064	0.995985	0.990905	0.968527	0.977036	0.993146	0.690061	1.02102	1.21174	0.537099
AT2A2_HUMAN	1.09815	1.08987	1.14421	1.06971	1.01503	1.11675	1.007	1.04965	1.18992	0.897363	0.927077	0.914536	1.05842	1.11871	1.03333	1.00145	1.0143	0.885697	1.07375	0.735408	0.910162	1.03822	0.238398
AT2B1_HUMAN	1.10179	1.13259	1.27732	1.17614	1.1194	1.17072	1.11481	1.00959	1.07902	0.728647	0.784251	0.750283	1.15757	0.794764	0.934955	0.988067	1.10261	0.954878	1.35976	0.853778	1.11612	1.09185	0.50841
ATP5E_HUMAN	1.09297	1.0182	1.06622	1.07824	1.03991	1.11858	0.909793	0.385184	1.09562	1.02575	1.06228	1.20692	1.41534	2.23975	1.02195	1.0183	1.05088	0.970672	1.14776	1.11392	1.22184	1.02336	-0.481293
AT5F1_HUMAN	1.24992	1.19076	1.18333	1.21318	1.13082	1.12862	1.13954	1.09561	1.22813	1.01553	1.08505	0.798622	1.42521	1.54074	1.218	1.01822	1.04831	0.852743	0.869319	0.699999	1.17957	1.27151	0.126493
ATAD1_HUMAN	1.11631	1.02101	0.81523	0.869275	1.02875	0.926512	0.889013	0.854331	1.23764	1.07897	1.32541	0.972051	1.0821	0.871679	1.19385	1.04388	1.1645	1.01056	1.04579	0.554184	1.0772	1.07234	0.163407
ATD3A_HUMAN	1.12745	1.08817	1.13172	1.15497	1.11584	1.14873	1.17955	1.11034	1.34753	1.15421	1.25534	1.14788	1.33117	1.62267	1.20319	1.12318	1.20762	0.9878	1.00835	1.04236	1.07053	1.18309	-0.362323
ATG3_HUMAN	0.876846	0.92878	0.928428	0.828893	0.938597	0.838978	0.838128	0.811743	0.940524	0.883209	1.00909	0.801031	0.86311	0.753804	1.05373	1.05272	0.71657	0.845906	0.698188	0.606936	0.949681	0.917624	0.380135
ATG7_HUMAN	0.937165	0.922011	0.960051	0.856729	0.879587	0.809856	0.907261	0.834558	1.04474	0.993302	0.915345	1.02143	0.814589	0.89453	0.920193	0.929217	0.860207	1.06485	0.744067	0.81633	0.95407	0.930923	0.11037
ATLA3_HUMAN	1.08879	1.10449	1.07302	1.07312	1.05359	1.12079	1.0194	1.03736	1.003	1.02715	0.959616	0.915332	1.0233	1.0334	1.03031	0.967778	1.0204	0.91427	1.0826	0.74085	0.950251	1.00716	0.255032
ATOX1_HUMAN	0.961685	0.857553	0.78903	0.876049	0.969518	0.969196	0.985751	0.951468	1.18909	0.75715	0.77628	1.00132	0.507838	0.167544	0.759929	0.847349	0.773034	0.876973	0.654198	0.736342	0.800449	0.79707	0.378326
ATP5H_HUMAN	1.23066	1.27575	1.22375	1.27744	1.13453	1.29129	1.26052	1.2254	1.4297	1.07025	0.925215	0.940357	1.48565	1.96246	1.20487	1.06013	1.04597	0.921658	0.97369	0.937125	1.16008	1.14957	-0.0685667
ATP5I_HUMAN	1.22441	1.29008	1.07197	1.20963	1.04023	0.983605	1.10547	1.03006	1.17617	1.00163	0.892812	0.968842	1.34545	1.71996	1.04844	0.975892	1.05524	0.97085	0.972858	0.95108	1.18964	1.16514	-0.0734319
ATP5J_HUMAN	1.1932	1.21073	1.06855	1.22206	1.07002	1.27668	0.994134	1.16347	1.30561	1.1221	1.17558	1.40363	1.7521	3.33944	1.20135	1.0063	1.04481	1.02604	1.11693	1.31107	0.94433	0.896774	-0.521218
ATP5L_HUMAN	1.07157	1.08158	0.971664	1.05886	1.12557	1.12717	1.17209	1.12909	1.37386	1.11037	1.15078	0.952385	1.34153	1.56763	1.14552	1.09671	0.990607	0.841851	0.822594	0.80421	1.04477	1.13252	-0.105769
ATPA_HUMAN	1.17453	1.22915	1.09409	1.14045	1.17663	1.26814	1.17878	1.1939	1.39873	1.31086	1.26964	1.47456	1.61582	2.80501	1.07578	0.977803	1.15311	1.0051	1.11387	1.34963	1.13167	1.21477	-0.594499
ATPB_HUMAN	1.12138	1.19884	1.03499	1.11982	1.09678	1.20484	1.12204	1.12215	1.4176	1.37242	1.21207	1.55494	1.76098	3.11074	1.13344	1.0298	1.22074	1.01023	1.17129	1.50291	1.12246	1.21332	-0.580603
ATPD_HUMAN	1.13422	1.15571	1.05437	1.14597	1.08289	1.23403	1.06443	1.19088	1.40043	1.06783	1.1362	1.46485	1.80211	3.48668	1.13834	1.03018	1.17247	1.09009	1.24107	1.4801	1.09126	1.18256	-0.524672
ATPG_HUMAN	1.20376	1.19615	1.13129	1.12283	1.07637	1.16546	1.13524	1.05927	1.35441	1.28113	1.1784	1.33573	1.56257	2.51193	1.13983	1.0449	1.07914	0.980639	1.03524	1.17049	1.17332	1.31218	-0.510256
ATPK_HUMAN	1.35095	1.35265	1.1832	1.24721	0.988829	1.01735	1.02382	1.07534	1.16316	0.862476	1.00158	0.702971	1.17124	1.09702	1.16565	1.10238	1.20553	0.789296	0.789349	0.497521	1.01634	1.08757	0.485824
ATPO_HUMAN	1.22657	1.21075	1.09154	1.13795	1.05824	1.21984	1.06	1.14612	1.30116	1.22038	1.15387	1.30829	1.64851	2.61984	1.09076	0.9846	1.09162	0.928248	1.08641	1.27829	1.10805	1.14541	-0.527649
ATX10_HUMAN	0.854318	0.801362	0.835136	0.861858	0.894888	0.958625	0.933862	0.909146	1.08267	1.08728	1.00595	1.08322	0.570573	0.574729	0.906063	0.978021	0.799541	1.00294	0.59505	0.653586	0.860164	0.803174	0.10457
ATX2L_HUMAN	0.868425	0.904039	0.961248	0.988995	0.943294	0.905087	0.94209	0.946202	0.988807	0.81184	1.07567	0.981416	1.03479	0.948412	1.05405	1.06401	0.870631	0.959858	1.10158	1.22102	1.06019	1.19944	-0.14216
AUP1_HUMAN	1.18386	1.08557	1.09765	0.975867	1.06568	1.04998	0.911562	1.01113	1.07111	1.26657	1.06867	0.932642	1.06631	1.14126	1.03126	1.0201	0.995713	0.817083	0.946091	0.698971	0.947674	1.04282	-0.000670132
B2L13_HUMAN	1.11268	1.09485	0.87053	0.949741	0.909123	0.875114	0.926056	0.793089	0.999588	1.01218	0.928375	1.07597	0.948588	0.89398	0.983269	1.01905	0.987751	0.923881	0.966075	0.929848	1.0783	1.26222	0.121917
B2MG_HUMAN	1.10611	1.10231	1.05012	1.05318	1.13457	1.12197	1.01027	1.1415	1.00649	0.908538	0.980521	1.10294	1.09972	1.06669	1.0357	1.03751	1.06601	0.911287	1.36186	1.74874	1.23681	1.17542	-0.201063
BACH_HUMAN	1.20824	0.975916	0.894904	0.896431	1.04764	0.950159	0.977071	1.00402	0.841533	0.853912	0.9372	0.859825	0.877029	0.711324	0.826556	1.02946	0.865582	1.02307	0.834711	0.912064	0.883413	0.878585	0.436478
BAF_HUMAN	0.995532	1.10193	1.07775	1.03468	1.00163	1.02741	1.07895	1.01135	1.01623	1.13555	1.00279	1.11288	0.965727	1.06074	0.941157	1.00565	0.964385	0.967096	1.01312	1.61677	0.98894	0.92319	-0.334581
BAG2_HUMAN	1.00904	1.01306	1.08019	1.07865	1.05332	1.1435	1.06292	1.09195	1.14506	1.05666	1.04378	1.09958	1.15609	1.64776	1.104	1.05635	1.04042	1.10033	1.30282	1.79918	1.15959	1.22076	-0.461932
BAG6_HUMAN	1.04512	1.11746	1.16696	1.23641	0.90054	0.858424	0.979346	0.890828	0.684723	0.970822	0.865617	0.97533	1.36814	0.936517	1.44346	1.32718	1.10344	1.08261	1.02551	1.21421	0.834017	0.931698	0.296111
BAP31_HUMAN	1.11255	1.13602	1.25854	1.13938	1.09662	1.23715	1.0412	1.15526	1.06951	0.905723	0.813333	0.799509	1.16449	1.19936	1.01101	0.997167	1.02881	0.886298	1.14123	0.868862	0.990063	1.03665	0.273995
BASI_HUMAN	1.0427	1.07947	1.13917	1.07305	1.08271	1.12871	0.993026	0.992198	0.943399	0.686555	0.81566	0.665025	0.977717	0.83039	0.983989	0.94755	1.01456	0.938951	1.00336	0.662044	1.12211	1.08358	0.624143
BASP1_HUMAN	1.02274	0.955089	1.18294	1.13144	1.19194	1.21819	1.04284	1.24054	1.00513	0.906263	0.776573	0.871078	1.11228	0.743942	0.918559	0.932185	0.936479	0.988118	1.06193	0.99931	0.972863	1.01014	0.408881
BCAT1_HUMAN	0.916364	0.917826	0.969669	0.964704	0.874616	0.895695	0.945117	0.90467	1.02212	1.01675	0.937011	1.00055	0.712493	0.598518	0.813012	0.972836	0.805968	1.00834	0.837077	0.93217	0.927413	0.910347	0.188959
BCAT2_HUMAN	1.35534	1.115	0.911748	1.16595	0.876595	1.09284	1.22501	1.23476	1.22549	1.34803	1.30349	1.42165	1.61633	2.24887	1.27833	1.11813	1.11046	0.982073	1.24536	1.38172	1.00139	1.07625	-0.578393
BCCIP_HUMAN	0.80296	0.872186	0.899358	0.859469	0.962136	0.98494	0.981711	0.951076	1.05763	0.969684	0.918007	1.08237	0.969202	0.896092	0.925021	1.0077	0.835888	0.954412	0.932343	1.14005	0.960807	0.986946	-0.24484
BCKD_HUMAN	1.09033	1.22316	1.12879	1.22817	1.07669	1.1707	1.21383	1.09088	1.31627	1.36534	1.35824	1.32492	1.28379	1.5549	1.1447	1.0939	0.96127	0.981651	0.872979	0.684995	1.18643	1.1706	-0.376855
BCLF1_HUMAN	1.11706	1.09496	1.17975	1.17577	1.10887	1.21195	1.07453	1.22103	0.953561	0.973135	0.955681	1.04366	1.19914	0.932097	1.04029	0.998364	1.05841	0.957392	1.31909	1.3513	1.14932	1.16082	0.0107946
BGAL_HUMAN	1.07154	1.07006	1.0984	1.03937	0.983112	0.97863	1.17581	1.08612	0.998092	0.983425	0.873092	0.942235	1.29555	1.43019	1.11418	1.10796	1.15135	1.04443	1.21627	1.21887	1.07294	1.10221	-0.0107528
BGH3_HUMAN	1.22195	1.08423	1.265	1.1699	0.948329	0.925267	1.09073	1.06934	1.3473	0.773447	0.881677	0.727586	1.19774	1.58021	1.19813	1.12898	1.11992	1.01565	1.1635	1.42879	1.00562	1.17736	0.11149
BID_HUMAN	0.807569	0.760772	1.05074	0.952561	1.16518	0.994907	1.01978	1.08828	1.02372	1.06446	1.15332	0.914234	0.634739	0.476801	0.939081	1.09423	0.773853	1.16028	0.869243	0.620241	0.861601	0.70344	0.230234
BIEA_HUMAN	0.928415	0.896657	1.01532	0.926048	1.00459	0.82503	1.18132	0.942953	0.871722	0.876956	1.0792	1.13666	0.679141	0.490162	0.843739	0.974144	0.930887	1.09456	0.74636	0.873948	0.906698	0.879428	0.16563
BIN2_HUMAN	1.02057	0.906009	1.30863	0.994582	1.30261	0.92739	1.24218	1.17027	0.852601	0.770486	1.01119	0.94937	0.77239	0.512889	0.870911	0.993962	1.05838	1.01481	0.81701	0.83377	0.999927	0.88033	0.396082
BLMH_HUMAN	1.12108	0.964255	1.06322	0.974522	0.964467	0.930916	1.07166	0.948833	0.859472	0.874693	0.90018	0.802084	0.841183	0.648201	0.930162	1.14978	1.00771	1.02069	0.841984	0.854712	0.971352	0.77828	0.675669
BMS1_HUMAN	1.28739	1.14244	1.16498	1.12903	1.19895	1.09841	1.11982	1.13456	1.08987	0.875975	0.839318	0.693206	1.18906	0.692847	1.22134	1.24756	0.885473	0.965232	1.05475	0.58563	0.924925	1.09022	0.713682
BOLA2_HUMAN	0.813877	0.843942	0.860449	0.835002	1.00963	0.933224	0.874261	0.907333	1.0965	1.00019	0.878547	0.879886	0.666527	0.594859	0.924738	1.00805	0.803507	0.947126	0.789613	0.962469	0.913952	0.868338	0.335791
BOP1_HUMAN	0.944546	0.922326	0.812153	0.970405	0.927646	1.0671	1.03807	1.03029	1.06673	1.07841	1.19309	0.995762	1.21126	1.05675	1.13061	1.05171	1.04771	1.00867	1.15259	1.41053	1.12874	1.10269	-0.283098
BPNT1_HUMAN	0.835473	0.879405	0.731373	0.774827	0.941312	0.793731	0.897887	0.835714	0.878164	0.737264	0.690432	0.676128	0.773672	0.543239	0.945909	1.01743	0.799843	0.931728	0.728414	0.676121	0.812012	0.865149	0.83651
BRD4_HUMAN	0.916781	1.05598	1.05915	0.83573	1.04217	1.08137	0.911592	1.11075	0.957378	1.30999	1.28942	0.845341	0.805882	0.690679	0.904078	1.22943	0.594782	1.10373	0.984692	0.662165	0.916273	0.893476	0.065458
BRE1A_HUMAN	0.851781	0.986612	0.786248	0.875257	1.06656	1.12446	1.01153	1.05658	0.762253	0.629011	0.821682	0.735161	0.953387	0.902743	1.01891	1.01234	1.08868	0.929315	1.25392	1.32274	1.19917	1.15693	0.206861
BRE1B_HUMAN	0.865119	1.06988	0.936434	0.90423	0.971141	0.983513	0.98308	0.965714	0.785522	0.730276	0.910613	0.81316	0.976059	0.941539	1.14648	1.0243	1.064	0.931906	1.0951	1.58733	0.989221	1.0561	0.0847835
BROX_HUMAN	1.14251	1.05023	1.04035	1.05898	1.00224	1.01392	1.16954	0.936445	0.965138	1.03035	1.00628	1.03769	0.817945	0.515836	0.942749	1.04856	1.01894	1.21087	0.743781	0.51213	1.08609	0.767697	0.443969
BRX1_HUMAN	1.08332	1.09693	0.900819	1.01812	1.01662	1.13651	0.997784	0.9625	1.06897	1.03724	0.966134	0.889504	1.24969	0.853051	1.12808	1.05828	1.02254	0.950254	1.01571	0.695697	1.02173	1.19886	0.468465
BST1_HUMAN	1.1535	1.17329	0.901737	1.12772	1.05989	1.04034	1.02866	1.04625	0.956654	0.789836	0.78653	0.87945	1.08686	1.08368	1.01843	0.986974	0.980421	1.01691	1.16621	1.05994	0.942117	1.03708	0.317163
BT3L4_HUMAN	0.9656	0.966785	0.695975	1.12628	1.04644	1.05359	1.24017	1.0815	0.933681	0.7554	0.860068	0.974296	0.765025	0.584587	0.868863	0.85885	0.694385	1.01234	0.698169	0.749997	0.754889	0.874186	0.284074
BTF3_HUMAN	0.996921	0.946734	1.03226	0.945168	0.982144	0.825305	0.991815	0.901093	1.00798	0.895441	0.873421	0.751568	0.631828	0.362363	0.899286	0.94844	0.856536	1.01262	0.867369	0.885017	0.872328	0.874784	0.609536
BTK_HUMAN	0.933655	0.803385	0.918137	0.845203	1.10571	0.845991	1.05877	0.928426	0.924582	0.902425	0.944039	0.693342	0.74826	0.834056	0.999645	0.971418	0.923151	1.11692	0.71435	0.783933	0.942389	0.901895	0.556024
BUB3_HUMAN	0.871312	0.947952	0.841059	0.91733	0.977104	0.983094	0.969586	1.00313	0.97864	0.91314	1.02447	1.10463	0.903329	0.933648	0.929413	0.919484	0.940215	0.961406	1.05731	1.2246	0.97707	1.08944	-0.435719
BUD31_HUMAN	1.17658	1.1912	0.989634	1.04797	0.996054	0.968605	0.919795	1.09265	0.893253	0.669417	0.779435	0.807571	0.924745	0.759961	1.07524	1.02832	1.0346	0.955269	1.16075	1.00149	1.07095	1.11985	0.5942
BYST_HUMAN	1.02327	0.996297	0.893158	0.902122	1.06795	1.01682	1.01333	0.975879	0.409378	1.12518	0.940905	1.04355	0.833747	0.665656	1.0803	1.1016	0.893343	0.835422	0.759728	0.676808	0.920227	1.04503	0.163851
BZW1_HUMAN	0.939891	0.857891	0.986731	0.85061	0.97426	0.923997	0.966773	0.970553	0.927266	0.90376	0.951534	0.835577	0.682063	0.582497	0.906892	1.00815	0.924417	1.03659	0.822744	0.629967	0.936941	0.952029	0.530699
BZW2_HUMAN	0.981529	0.855918	0.926712	0.848381	0.899869	0.883579	0.952126	0.892581	1.13073	0.893474	0.983161	0.909101	0.532171	0.54279	0.864151	0.991603	0.878887	0.947547	0.729193	0.519473	0.915859	0.90156	0.374257
C1QBP_HUMAN	1.10958	1.21475	0.910815	1.0833	1.15696	1.23805	1.18879	1.19898	1.41027	1.3873	1.66031	2.27785	1.72007	2.70399	1.16259	1.07641	1.21394	1.08378	1.31388	1.62407	1.23193	1.27623	-0.810655
C1TC_HUMAN	0.962079	0.897605	0.974287	0.943965	0.95034	0.900369	0.956955	0.938527	0.927657	0.884055	1.01408	0.915469	0.876004	0.900311	0.893416	0.981424	0.859338	1.00635	0.730756	0.777595	0.938088	0.867816	0.203113
C1TM_HUMAN	1.04581	1.04415	0.860651	0.928965	1.1215	1.18956	1.17988	1.13248	1.43375	1.33731	0.828742	1.11185	1.08212	1.0623	1.14613	1.12003	1.16685	1.12004	1.03419	0.819083	1.06226	1.19381	0.280051
CAB39_HUMAN	0.994498	0.84803	0.909425	0.928425	0.873872	0.807408	0.931731	0.833625	0.862548	0.827538	0.950608	0.895785	0.610385	0.323013	0.848114	0.942848	0.849775	0.994976	0.631069	0.55033	0.830695	0.856258	0.458085
CAB45_HUMAN	0.952405	0.912349	0.932942	1.03895	1.06105	1.11882	0.956692	1.14441	0.900871	0.69914	0.776478	0.73563	1.03659	1.40419	1.08392	0.915056	1.01772	1.00524	0.785037	0.630768	1.13732	1.07593	0.207357
CAH2_HUMAN	0.970873	0.872029	0.975251	0.97369	0.952647	0.854575	1.01316	0.913516	0.8644	0.806437	0.93877	0.865436	0.776679	0.414782	0.92281	1.01564	0.841762	0.952732	0.662942	0.792851	0.892517	0.879988	0.55073
CAHM2_HUMAN	1.3359	1.34193	1.40053	1.22352	1.1597	1.09087	1.30787	1.14939	1.20397	1.66737	1.10464	1.03847	0.88356	0.826712	1.04939	0.899781	1.11615	0.984751	0.957814	0.665147	0.8974	1.03978	0.197076
CALM_HUMAN	0.854403	0.942886	0.969837	0.982488	1.04078	1.0516	1.05324	1.0597	1.0112	0.766375	0.956557	0.843038	0.831155	0.792689	0.888775	0.972688	0.830018	0.944963	0.831242	0.988182	0.89314	0.921534	0.309377
CALR_HUMAN	0.96575	1.01272	1.01222	1.02901	1.01587	1.06928	1.01143	1.05152	0.904383	0.813445	0.898123	1.0724	1.40953	1.96624	1.03468	0.981623	1.06718	1.01028	1.32312	1.46066	1.19475	1.20864	-0.415583
CALU_HUMAN	1.02504	1.0974	1.07167	1.06117	1.02798	1.12476	1.00333	1.0889	1.0155	0.803387	1.06336	1.17108	1.41157	1.83826	1.0893	1.03377	1.02741	0.985054	1.22468	1.29922	1.11284	1.14684	-0.495128
CALX_HUMAN	1.13802	1.23998	1.05774	1.08435	1.08988	1.24126	1.13539	1.08777	1.08729	0.943416	0.905652	1.02239	1.31966	1.37936	1.10917	1.03167	1.12095	0.889665	1.1572	0.980888	0.918127	1.05105	-0.0398802
CAN1_HUMAN	0.936775	0.919671	0.959554	0.838583	0.908149	0.810362	0.954167	0.851302	0.840047	0.782012	0.809695	0.723448	0.712592	0.562934	0.947655	1.02542	0.878133	1.02791	0.63975	0.619452	0.924155	0.862324	0.755545
CAN2_HUMAN	0.914879	0.816885	0.933239	0.918303	0.958388	0.981154	0.954702	0.913519	0.924418	0.861748	0.98222	0.857518	0.742118	0.60906	0.852466	0.982349	0.814693	0.973969	0.707617	0.719929	0.898375	0.847208	0.383808
CANB1_HUMAN	1.07277	1.111	1.12922	0.928215	1.11339	1.13468	1.3038	1.08268	1.01505	1.12733	1.06741	1.12888	0.978677	0.832742	1.02334	1.08368	1.05908	1.05859	0.893931	1.05556	0.95744	0.908148	0.164007
CAND1_HUMAN	0.985461	0.914551	0.928523	0.871517	1.01545	0.854107	1.03381	0.871748	0.912947	0.929419	0.962749	0.893005	0.687057	0.685453	0.937844	0.968326	0.854306	1.03434	0.731064	0.594377	0.830876	0.787736	0.410525
CAP1_HUMAN	1.00916	0.923425	1.02731	0.982414	1.01703	0.928361	1.00043	0.955055	0.901035	0.889591	0.88658	0.814433	0.894374	0.598103	0.976178	1.03814	0.907137	0.981015	0.899207	0.850905	1.02649	0.933054	0.740295
CAPG_HUMAN	0.945724	0.875522	0.909155	0.9182	1.0149	0.918794	1.01387	0.931392	1.02461	1.017	0.966489	0.993415	0.729578	0.4711	0.911741	1.00337	0.814791	0.975423	0.741364	0.883724	0.890816	0.821088	0.324772
CAPR1_HUMAN	1.03702	1.0278	1.05544	1.01922	1.05237	1.10439	0.973269	1.12535	1.0324	0.930471	0.994264	0.959184	0.896096	0.704197	1.00182	1.06768	0.971743	1.00823	1.10902	1.22532	1.03349	1.09269	0.282467
CAPZB_HUMAN	0.955123	0.915797	1.01889	0.977924	0.988422	1.00845	0.992574	0.995912	0.932711	0.792933	0.848766	0.838625	0.827891	0.687294	0.974115	1.00618	0.907034	1.03896	0.891705	0.903207	1.06004	0.993767	0.677977
CAR19_HUMAN	1.02642	1.70698	1.08855	1.06947	0.784546	1.00337	0.878964	0.896368	1.03074	0.981711	1.15786	0.990205	0.95354	0.987542	1.08689	1.12957	0.773663	0.840164	1.13885	0.387092	1.00569	1.14784	0.102745
CARD9_HUMAN	1.01514	0.870369	0.942586	0.938456	0.791591	0.775509	0.829815	0.84651	0.899629	0.928019	0.966823	0.814382	0.696612	0.888432	0.660771	0.997735	0.921963	0.992764	0.858018	1.03419	0.915627	1.11917	0.0145466
CARF_HUMAN	0.977486	0.903693	1.02595	0.835985	1.06432	1.17077	0.961069	1.0752	0.859917	0.606023	0.679096	0.315034	1.05767	0.934002	1.002	1.02724	0.85362	0.904391	1.13647	0.747865	1.97875	1.72946	0.387326
CARM1_HUMAN	0.813974	0.758469	0.834909	0.945122	0.996814	0.897114	1.20614	1.04967	0.997031	1.26793	1.1015	1.09826	0.863749	0.982022	0.942924	0.953346	1.26905	1.01106	1.18796	1.44331	1.05121	1.16656	-0.283037
CASP1_HUMAN	1.12146	1.11256	1.14012	1.10792	1.02775	1.08816	1.07005	1.03833	0.847347	0.987076	1.13477	0.907436	0.803487	0.770392	0.953517	0.886999	0.756374	1.01601	0.704518	0.71615	0.93814	0.94764	0.176032
CATA_HUMAN	0.938913	0.940512	0.912837	0.966489	1.02174	1.00091	0.972552	0.977061	0.94904	0.989139	0.995988	1.08848	1.15789	1.39703	1.00862	1.00771	1.01215	0.996607	1.01303	1.03869	1.07509	1.06684	-0.509237
CATB_HUMAN	0.97516	1.03475	0.98934	1.08731	1.05141	1.1126	1.04348	1.03559	0.986715	0.996266	0.819635	0.877991	1.15547	0.927425	1.0641	1.02489	1.06926	0.94312	1.52935	1.62517	1.05695	1.18898	0.0352338
CATC_HUMAN	1.0332	1.02794	0.869435	0.994077	1.05711	0.944253	1.07302	1.11145	0.738453	0.756188	0.733137	0.912756	1.26213	1.84421	1.0581	1.04174	1.05343	0.995605	1.23027	1.50724	1.05323	1.22452	-0.218905
CATD_HUMAN	1.03092	1.08107	1.00211	1.16545	1.10077	1.18079	1.00351	1.08375	1.01273	0.98949	1.00618	1.07383	1.07743	1.24077	1.04422	1.04886	1.10858	1.06756	1.26574	1.37878	1.02692	1.13388	-0.363102
CATG_HUMAN	1.30154	1.01871	1.47247	1.15734	1.11247	0.885582	1.12086	1.03692	1.51391	0.965824	1.45525	1.57317	1.32382	2.45356	0.921158	1.20429	1.10836	1.1196	0.993599	1.19161	1.03917	1.11341	-0.569295
CATH_HUMAN	1.13703	1.23462	1.39745	1.20251	1.17545	1.1305	1.09674	1.22757	1.04386	0.907027	0.974643	0.915068	1.24195	1.33205	1.12316	1.05118	1.0363	1.00229	1.62207	1.82049	1.12101	1.03276	-0.129556
CATL1_HUMAN	0.988545	1.04534	1.07254	1.17651	1.0098	0.985492	0.92822	1.08546	1.04378	1.04966	0.964127	0.889795	1.17879	0.802465	1.12943	1.12088	1.03184	0.919131	1.50741	1.5851	0.985724	1.0248	0.0624767
CATS_HUMAN	1.00558	1.10794	1.02353	1.14605	0.99693	1.02596	0.942109	1.01978	0.861588	0.868819	0.989519	0.999805	1.14272	1.27817	1.02012	0.986586	0.952803	0.901983	1.10178	1.26831	1.08622	1.16734	-0.334423
CATZ_HUMAN	0.961258	0.954461	1.01484	1.0526	1.04685	1.10897	1.00021	1.16973	0.904957	0.817987	0.866479	0.921043	1.17139	1.37721	1.04417	1.03132	1.02113	0.949998	1.27888	1.51342	1.17786	1.13486	-0.205016
CAZA1_HUMAN	0.972749	0.988861	0.93946	0.94317	1.06686	1.01317	1.00332	1.08981	0.997976	0.96713	1.0159	1.17646	0.921174	0.848841	0.960138	0.970267	0.911911	0.976144	0.914324	1.04024	0.962983	0.978169	-0.215273
CAZA2_HUMAN	0.923249	0.979805	0.800219	0.977388	1.03637	1.0429	1.00403	1.01604	0.87271	0.86074	1.00647	1.05843	0.835941	0.776553	0.972036	1.07315	0.882654	0.923346	0.836888	0.973727	0.949541	0.908129	0.0717814
CBL_HUMAN	1.0642	1.08762	0.966179	0.974118	1.00218	0.863621	0.961445	0.896766	0.80876	0.947469	0.658452	0.683028	0.74236	0.531043	0.954099	1.02719	0.89867	1.0132	0.748545	0.625113	0.887407	0.825563	0.806993
CBPM_HUMAN	1.11717	1.1957	1.12421	1.14886	1.04034	1.21782	1.01667	1.08856	1.07751	0.858799	1.03508	1.08179	1.14224	0.850331	0.980761	0.936123	1.19933	1.0465	1.34929	1.33398	1.118	1.06795	0.019944
CBR1_HUMAN	0.892348	0.925582	0.883335	0.913253	1.03743	0.936473	1.0444	0.952607	1.02005	0.956436	1.01409	0.987432	0.723006	0.534895	0.841946	0.947009	0.866096	0.978886	0.751664	0.780459	0.877533	0.921166	0.288941
CBSL_HUMAN	1.13985	1.04063	0.881765	0.949866	0.920491	0.835889	1.00661	0.909459	1.07555	1.14733	1.38777	1.1353	0.781486	0.63458	0.915631	0.911274	0.862442	1.02808	0.791634	0.798109	0.965345	0.902025	-0.0934024
CBX3_HUMAN	0.820597	0.884525	0.922857	0.946478	0.963219	1.05883	0.809415	1.03416	1.00069	0.792736	0.824521	0.752493	0.915954	0.856444	1.00982	0.943609	0.952802	0.964186	1.36056	1.50669	1.09044	1.01616	0.057883
CBX5_HUMAN	0.976063	0.9977	0.990928	1.02541	0.993874	1.14772	0.976604	1.17393	0.942124	0.79907	0.914746	0.813301	1.18167	0.983349	0.978392	1.03736	0.948802	0.982182	1.28558	1.37411	1.13819	1.10144	0.0771314
CC124_HUMAN	0.674955	1.02663	0.622702	0.889055	0.843189	0.912515	1.02559	0.807355	0.95322	1.03832	1.26834	1.1025	0.935404	0.747045	0.994966	1.16145	0.845224	0.943199	0.969794	1.47685	0.99396	0.96228	-0.263173
CCAR1_HUMAN	1.04756	1.06659	1.03713	1.09735	1.06788	1.10993	0.938369	1.03404	1.0911	0.966329	1.03571	1.04618	1.20356	1.14496	1.07448	1.00017	1.07974	0.997528	1.2471	1.23768	1.17204	1.21445	-0.230221
CCAR2_HUMAN	0.985558	1.02053	0.971907	1.04973	1.01728	1.0615	0.957125	0.991509	0.987448	0.877907	1.02185	0.991946	1.15436	1.23501	1.04007	0.998348	1.01727	0.986133	1.09574	0.94032	1.09444	1.10179	-0.225237
CCD47_HUMAN	1.0096	1.06289	0.907692	0.933121	0.958064	1.05327	0.978837	0.928167	1.07069	0.830997	0.860134	0.728679	1.0587	1.09705	0.970026	0.856093	0.994817	0.930527	0.9912	0.742076	1.06469	0.941739	0.375737
CCD58_HUMAN	0.986683	1.01833	0.966298	0.953221	1.03818	1.12258	0.956215	1.13388	0.969247	0.847064	0.989199	0.882586	1.41136	1.681	1.0513	0.957473	1.0133	0.963715	1.1813	1.14642	0.993437	1.11045	-0.304259
CD109_HUMAN	1.00754	1.081	0.906235	1.13947	0.980066	0.955868	0.964745	0.912742	0.965136	1.01549	1.15312	1.26651	0.993429	0.779563	0.970507	0.948982	1.1291	1.10839	1.20854	1.08046	0.989235	0.992364	-0.251603
CD11B_HUMAN	1.00853	0.916627	0.912542	1.01516	1.07251	1.10359	0.975303	1.09301	1.0637	0.928498	1.03957	0.967091	1.13322	1.07072	1.02063	0.951582	1.1152	1.01963	1.21572	0.869652	1.59781	1.42647	0.0636437
CD166_HUMAN	1.0307	1.09645	1.07599	1.10656	1.1685	1.22318	1.18445	1.18122	1.05016	0.764986	0.869149	0.76252	1.06036	0.734441	1.06415	1.00238	1.05523	1.02161	1.0898	0.638785	1.03824	1.06799	0.642547
CD276_HUMAN	0.934105	0.980988	1.1175	0.990187	1.15355	1.20882	1.05491	1.02603	1.07637	0.94315	1.21691	1.08909	1.11898	0.864235	0.952812	1.02607	1.20036	1.06228	1.06516	0.873411	0.85181	0.859673	-0.0473898
CD2AP_HUMAN	1.05653	0.990698	1.07664	1.05709	0.989438	0.810423	1.11089	0.968455	0.866408	1.17568	0.960914	1.22263	0.873369	0.965193	1.07338	1.08768	1.06568	1.13286	0.84864	1.29906	1.16216	0.999677	-0.0595268
CD36_HUMAN	1.12618	1.1099	1.14981	1.13376	1.08154	1.22465	1.04067	1.10046	1.28413	1.03344	1.02841	0.976134	1.17089	1.02232	1.05632	0.975275	1.1701	1.11031	1.55937	1.06933	1.01228	1.1454	0.0761682
CD44_HUMAN	1.01947	1.13065	1.17979	1.20845	1.22316	1.37968	1.12033	1.21893	1.05518	0.911478	0.881758	0.788439	1.09106	0.856034	0.960065	0.935371	0.953967	0.91074	1.14405	0.797032	1.02214	1.06683	0.368656
CD63_HUMAN	0.816794	0.910417	1.02483	1.23962	1.05101	1.18674	1.08334	1.11352	1.13105	1.00037	0.762711	0.710427	1.25007	2.24454	0.977819	0.983337	0.941189	1.08159	1.33106	1.49704	1.02509	1.05774	-0.29611
CD81_HUMAN	1.03522	1.154	1.07692	1.1948	1.02848	1.13299	1.04675	1.06468	1.24329	1.01756	0.952042	0.930099	0.903304	0.737112	0.953594	0.953093	0.974016	0.952921	1.1188	0.888061	0.98445	1.0848	0.388632
CD9_HUMAN	1.0958	1.20252	0.932099	1.26925	1.12998	1.13608	1.06291	1.13067	1.18871	1.04077	1.0166	0.919121	1.07075	0.917385	0.94753	0.967834	0.940846	0.9698	1.13273	0.930016	0.941302	1.00028	0.228424
CD97_HUMAN	1.03231	1.07528	1.06698	1.0861	1.02212	1.09513	1.04412	1.03251	0.970973	0.845744	0.963728	0.955709	0.990309	1.01995	0.945238	0.90798	1.00899	0.929799	1.20754	1.37985	1.05902	1.10024	-0.137782
CD99_HUMAN	1.12194	1.14824	1.15869	1.28724	1.39813	1.36752	1.13138	1.39654	0.822119	0.649772	0.618302	0.341123	0.957001	0.862869	1.00718	1.03772	1.28206	1.13354	1.35578	1.01203	1.01486	1.27855	0.564135
CDC37_HUMAN	0.844916	0.851029	0.885809	0.929178	0.905567	0.935487	0.90278	0.897985	0.924168	0.846717	0.839131	0.852078	0.778444	0.720894	0.901913	0.915182	0.88586	0.996066	0.837016	0.894421	0.927438	0.95686	0.539725
CDC42_HUMAN	1.09147	1.03202	1.08739	1.04517	1.11957	1.15633	1.13096	1.06732	1.13906	1.1175	1.07031	1.05112	0.841201	0.666964	0.976725	1.02693	0.973583	0.984026	0.861845	0.790017	0.89938	0.840075	0.266225
CDC5L_HUMAN	1.09526	1.16593	1.06414	1.04348	1.11433	1.20528	1.03106	1.12634	1.17953	1.10437	1.13114	1.19646	1.0797	1.11463	1.11693	1.05548	1.05749	0.944094	1.06077	0.85227	1.07618	1.20903	-0.192342
CDC73_HUMAN	1.13395	1.15659	1.07703	1.07877	1.03645	1.07967	1.02803	0.94476	1.15693	1.25763	1.08432	1.14628	1.00052	0.85353	1.14297	1.02398	0.949249	0.88378	0.929878	0.606148	1.22897	1.01761	0.147186
CDIPT_HUMAN	1.21821	1.02598	1.24644	0.672383	1.17595	0.910639	1.04373	1.00768	1.13899	1.08983	0.885419	0.974327	1.3932	1.80829	1.4255	1.12039	1.08391	1.0192	1.08631	1.19511	0.829331	0.982734	-0.104952
CDK1_HUMAN	0.999776	0.88432	0.951997	0.869727	1.01457	0.889556	1.00493	1.03717	0.771051	0.750067	1.03008	0.783592	0.915992	0.661685	1.2341	0.940255	0.967683	1.15168	1.01561	0.956904	0.904819	0.981297	0.483271
CDK5_HUMAN	1.06072	1.01597	1.03855	0.907683	0.95661	0.916371	0.969599	1.0033	1.59874	1.40674	1.11317	1.12419	0.881268	0.772631	0.995437	1.01445	0.921884	1.03882	0.832244	0.925484	0.869407	0.907272	0.0502544
CDK6_HUMAN	0.976832	0.9704	1.05098	0.950163	0.997519	0.948232	1.02675	0.928662	0.960463	0.968302	1.09685	0.893102	0.774674	0.467138	0.950245	0.980248	0.799954	0.906111	0.71654	0.696439	0.884705	0.94258	0.375035
CDV3_HUMAN	0.888986	0.876956	0.964356	0.939696	1.01655	0.959258	1.04281	0.99245	0.958099	0.9327	0.895823	0.799771	0.751095	0.509654	0.939052	1.05253	0.798957	0.996422	0.831448	0.769186	0.890715	0.946346	0.59648
CE170_HUMAN	1.07107	1.04975	1.05114	1.24332	0.962439	0.943753	0.967065	1.10838	0.757833	0.53398	0.2683	0.510188	0.984977	0.896264	1.0194	1.17472	0.832361	0.912715	0.79027	0.778461	1.17862	1.21089	0.664322
CEBPZ_HUMAN	1.15984	1.25548	0.571329	1.09855	1.084	1.18577	1.03498	1.06751	1.12218	0.574796	0.935362	0.688794	0.878575	0.731546	0.993636	0.946915	0.993775	0.875164	0.983726	0.586155	0.896041	1.09358	0.477032
CECR5_HUMAN	1.28652	1.15235	1.10567	1.26002	1.07045	1.10765	1.13993	1.19549	1.41657	1.54437	1.26971	1.15424	1.53129	1.68131	1.23185	1.08799	1.40181	1.30989	1.11213	1.20067	1.2413	1.22334	-0.249539
CELF1_HUMAN	1.08755	1.03795	0.927686	1.01021	1.01389	1.0634	0.966284	0.944193	1.01271	1.02436	0.908493	0.796843	1.25917	0.986272	1.03586	0.966101	1.1224	1.00609	1.17315	1.43647	1.2596	1.21435	0.168971
CELF2_HUMAN	1.0099	1.03558	0.955063	0.999503	1.05905	1.04997	0.936642	1.03009	1.11998	1.10905	1.01017	0.904035	1.29532	0.936589	1.02082	0.989748	1.08967	0.990493	1.20328	1.36012	1.10602	1.11995	0.0471007
CERS2_HUMAN	1.11803	1.2187	1.12511	1.02716	0.90148	0.896333	0.951948	0.990121	1.14632	0.996574	1.23947	1.09341	1.0806	0.929254	1.08127	1.0398	1.16919	0.957288	1.02507	0.792124	0.95581	1.02575	0.0786952
CH10_HUMAN	1.09981	1.14108	1.12682	1.06544	1.05951	1.27569	1.02944	1.06685	1.32711	1.3116	1.20172	1.38467	1.6309	2.51532	1.06635	0.996341	1.08295	0.933758	1.23029	1.44517	1.13637	1.19062	-0.624212
CH3L1_HUMAN	0.913831	1.00628	0.862937	0.861357	0.920049	0.997537	0.879802	0.970389	0.854448	0.648931	0.843525	0.735026	1.05706	1.37316	1.01768	0.93176	1.01961	0.970865	1.02716	1.01719	1.11637	1.18276	0.0250184
CH60_HUMAN	1.18961	1.20805	1.16171	1.18176	1.1737	1.33725	1.17651	1.22649	1.45817	1.47657	1.32908	1.58084	1.81519	3.09216	1.1334	1.04713	1.22808	1.02259	1.36234	1.7338	1.13546	1.19435	-0.63452
CHCH2_HUMAN	1.05293	1.05364	1.13067	1.05379	0.971679	0.996263	1.02198	1.06456	0.860873	0.9133	0.908309	0.767655	1.22251	1.34882	1.04252	0.976157	1.09697	0.972692	1.19331	1.25342	1.1559	0.993588	-0.00773618
CHD4_HUMAN	1.14793	1.25915	1.12555	1.23887	1.0687	1.13971	0.968632	1.09478	0.99169	0.711356	0.821081	0.792109	0.973343	0.85897	1.05341	0.982604	1.03859	0.912439	0.961899	0.540489	1.0358	1.05191	0.557014
CHERP_HUMAN	1.02362	1.06591	1.07191	1.07281	1.02629	1.08367	1.00083	1.0884	1.07646	1.01965	1.11859	0.996063	1.34609	1.10976	1.15295	0.966192	1.02701	0.914477	1.18014	1.08035	1.15472	1.2322	-0.129123
CHID1_HUMAN	1.04407	0.957147	0.939753	0.911337	0.97895	1.00501	0.986108	1.03786	0.898956	0.859306	0.989317	1.06176	1.17599	1.21847	1.04059	0.927118	1.14155	0.983131	0.877111	0.541996	1.20785	1.12044	0.0258222
CHM4B_HUMAN	0.923375	0.91952	0.93877	0.978898	1.01702	1.02729	1.03622	1.02286	1.01634	1.01359	0.942733	0.93834	1.05105	1.5265	0.968849	1.01422	0.757721	0.82551	0.732942	0.828702	0.914595	0.909985	-0.297811
CHMP5_HUMAN	1.0546	1.1247	1.00642	0.861708	0.985478	0.82184	0.945686	0.946	1.30163	0.894978	1.17747	1.12475	0.765429	0.686392	0.926613	0.987416	0.74073	0.993795	0.842347	0.896113	0.767474	0.819076	0.0204215
CHMP7_HUMAN	0.965648	0.861132	1.05463	0.898436	1.18451	0.900482	1.54959	1.46281	0.589465	1.42259	1.19146	1.03867	1.25816	1.27318	1.72825	1.31221	1.03658	0.939514	1.027	1.22523	0.783639	0.893	-0.0287344
CHP1_HUMAN	1.01944	1.21712	1.07581	1.1973	1.01738	1.21856	1.02699	1.03418	1.27579	1.14049	1.22854	1.28545	1.21075	1.31822	1.08692	1.05952	1.02165	1.07424	1.20601	1.12616	0.944167	0.983651	-0.64017
CHRD1_HUMAN	0.942882	0.872231	1.0237	1.01541	1.06344	1.01361	1.01248	0.958183	1.10332	1.24574	0.882267	0.982749	0.764171	0.42222	0.908613	0.941126	0.824703	0.982894	0.987298	1.295	1.03455	0.944066	0.177743
CIRBP_HUMAN	1.03375	0.96329	0.955619	1.02907	1.09093	1.16476	0.972355	1.28282	0.897504	0.876175	0.931394	0.826368	1.06791	0.638601	0.873571	0.924809	1.02116	0.995507	1.12733	1.27436	0.908067	1.02658	0.245046
CISY_HUMAN	1.17813	1.1789	1.08442	1.11954	1.10496	1.24712	1.15731	1.12621	1.25651	1.21753	1.13759	1.18212	1.46039	1.69467	1.08274	1.07391	1.1731	0.9903	1.03725	0.802427	1.15109	1.22844	-0.297676
CK5P3_HUMAN	0.993238	1.04197	1.03638	1.10852	1.04739	1.07731	0.915793	1.01779	1.03505	0.990489	1.00038	0.951527	1.01581	0.978381	1.0394	1.04435	1.11472	0.991001	1.20703	1.22457	1.11929	1.21288	0.0616542
CKAP4_HUMAN	1.16941	1.25105	1.16229	1.0762	1.0254	1.15596	1.00557	1.05865	1.21779	0.929914	1.04579	1.05987	1.18069	1.46769	1.01656	0.90662	0.987563	0.857017	1.07001	0.809471	1.03702	1.13419	-0.237898
CKAP5_HUMAN	0.988499	0.857366	0.658843	0.997136	0.790779	0.775541	0.867348	0.794231	0.573235	0.32276	0.334718	0.344981	0.584275	0.769293	0.884795	0.882426	0.759082	0.809933	0.696438	0.473802	0.706025	0.690111	0.66422
CLCA_HUMAN	0.957378	0.956592	0.98654	1.05218	1.06919	1.05027	1.0249	1.06302	0.897707	0.856663	0.955386	0.990697	0.996695	1.14648	1.01494	1.02443	0.903698	0.918324	0.875491	1.10752	1.01451	0.984615	-0.192814
CLH1_HUMAN	0.979194	0.947473	0.940962	0.926385	0.964403	0.914971	0.946469	0.932089	0.899542	0.9285	0.90954	0.922792	0.869029	0.885765	0.957218	0.982994	0.969474	1.01737	0.865262	0.86237	0.975877	0.936981	0.597648
CLIC1_HUMAN	0.853751	0.894885	0.839565	0.855875	1.00114	0.894258	0.970972	0.896751	0.939074	0.955295	1.00293	1.05367	0.739036	0.552879	0.890336	0.999899	0.808881	0.999746	0.684798	0.683704	0.889677	0.857742	0.224408
CLIC4_HUMAN	0.887911	0.969916	0.929468	0.995625	1.02176	0.987168	0.912073	0.988861	0.897637	0.888543	1.03916	0.943935	0.862182	0.518842	0.865568	0.93921	0.764945	0.991879	0.812182	0.825684	0.839318	0.82575	0.246144
CLN3_HUMAN	1.15958	1.37882	1.09646	0.951763	0.964493	0.970252	0.817864	0.833445	1.0077	1.148	1.3573	0.925537	1.2724	1.90454	1.13985	1.0143	1.29694	1.27813	1.14537	1.27557	0.950718	1.00361	-0.354051
CLP1L_HUMAN	1.16865	1.12329	0.913437	0.967144	1.08787	0.914806	1.01084	1.05671	0.903172	1.12358	0.940015	1.37211	1.13609	1.29658	1.19423	1.16808	1.1259	0.946259	1.05081	0.819422	0.784244	0.948923	-0.221354
CLPB_HUMAN	1.20242	1.08332	1.01105	1.1422	1.03837	1.11099	0.91883	0.973857	0.91	0.862667	1.07959	0.612012	1.15035	1.49686	0.979961	0.962154	1.0816	0.904267	1.11056	0.891832	1.11992	1.15304	-0.00929373
CLPP_HUMAN	1.12096	1.18044	1.03317	0.938196	1.19865	1.2006	1.10837	1.19054	1.28304	0.920633	1.01825	1.15153	1.66448	2.8504	0.99893	0.866985	1.30319	1.00363	0.926839	1.36737	0.957173	1.17801	-0.406642
CLPX_HUMAN	1.18755	1.53419	1.19433	1.33099	0.937983	0.862311	1.0535	1.2493	1.09628	1.17628	1.0609	0.824629	1.21546	1.27432	1.15729	0.920423	1.31809	0.908513	1.05474	1.11205	1.09421	1.2513	0.199757
CMC2_HUMAN	1.28239	1.33222	1.15316	1.03179	1.18785	1.21495	1.30504	1.10316	1.38935	1.40185	1.48459	1.25825	1.13802	1.11818	1.13432	1.12431	1.24913	1.07112	0.865981	0.637058	1.07184	1.35549	-0.0230016
CN159_HUMAN	1.18907	1.29217	1.20382	1.2217	0.9939	1.08307	0.924793	1.08792	1.38953	1.15127	1.2848	1.26241	1.13425	1.21216	1.18395	1.01282	0.869602	0.682477	0.970317	0.620166	1.26781	1.18482	-0.184858
CN166_HUMAN	0.995692	0.957083	0.95218	0.977453	1.01027	1.0126	1.03819	1.02838	0.992705	1.04061	1.15666	1.20782	1.129	1.38391	0.968599	0.912097	1.03684	1.02658	1.10888	1.33528	0.992763	1.14641	-0.770815
CN37_HUMAN	1.05705	1.04823	1.0618	1.12025	1.04019	1.11763	1.05862	1.08073	1.02634	1.02207	1.13818	0.982758	0.879509	0.887117	0.957529	0.918867	0.946077	0.943673	0.937605	0.735821	0.916918	0.968373	0.0475528
CNBP_HUMAN	0.918455	0.811376	1.0693	1.02964	1.07813	1.1199	1.1102	1.12416	1.10795	1.17302	0.52595	0.506163	0.904761	0.491623	0.949299	1.03324	0.750646	0.963969	1.21368	1.2212	0.98953	0.906231	0.514138
CND1_HUMAN	0.97416	0.890597	1.02914	0.91333	1.23996	0.795121	1.10302	0.979722	0.615968	1.06764	0.950727	1.25615	0.919268	1.01553	1.25762	1.18962	1.30242	1.17582	0.816374	0.648748	0.87844	0.691869	0.120342
CND3_HUMAN	0.977685	0.945602	0.987185	0.902044	0.894903	0.838596	0.928396	0.790411	0.981301	0.871562	1.13339	1.0562	0.831966	0.939428	1.0948	1.11304	1.11154	1.24951	0.78367	0.777267	1.03166	0.793338	0.15022
CNDP2_HUMAN	0.954507	0.869641	1.02579	0.962098	0.929746	0.883279	0.994554	0.919315	1.037	0.945143	1.05716	1.02424	0.64698	0.29848	0.963689	1.03219	0.802539	1.00153	0.756783	0.867738	0.960806	0.941629	0.320748
CNN2_HUMAN	1.00041	0.907294	1.03594	1.01071	1.00722	0.888476	0.977826	0.946693	0.924283	0.914181	0.802182	0.910108	0.657289	0.494389	0.8853	0.991313	0.811282	0.939659	0.651995	0.724428	0.914255	0.82547	0.524314
CNOT1_HUMAN	1.0232	0.929655	0.910767	0.862176	0.936744	0.933504	0.95835	0.882522	0.872335	0.895905	0.988122	1.0432	0.806607	0.888733	1.04616	1.0251	1.0329	1.13897	0.951147	0.734404	0.92587	0.814452	0.182692
CNPY2_HUMAN	0.965111	0.995915	0.988237	0.992714	0.975286	1.07861	0.977684	1.07978	0.909985	0.85902	1.1027	1.07733	1.43617	2.01951	1.02759	0.964374	1.02707	0.915166	1.26504	1.3249	1.10993	1.08747	-0.53491
CNPY3_HUMAN	1.02889	1.087	1.08644	1.04138	1.06569	1.0827	0.970594	1.06298	0.959361	0.825764	1.01208	1.04537	1.41674	1.9174	1.14013	1.04974	1.09128	0.965414	1.27705	1.31756	1.28073	1.03423	-0.380536
CO6A1_HUMAN	0.947386	1.10099	0.958988	0.99231	0.974453	1.05754	0.955286	0.981718	1.01677	0.833501	0.94003	1.01073	1.23282	1.8165	1.06392	1.03392	1.01735	0.96458	1.1364	1.02943	1.06111	1.25154	-0.338027
COA7_HUMAN	0.978259	1.00634	0.935213	0.988784	0.978845	1.0889	1.00846	1.06526	1.10682	0.843872	0.974656	0.882997	1.19831	1.48237	1.03128	1.02536	0.959052	0.974985	0.904219	0.708288	1.30913	1.3234	-0.00687723
COASY_HUMAN	0.962656	1.00086	0.88884	0.827177	0.961553	0.883963	0.931626	0.875396	0.993569	0.803825	0.996819	0.972156	0.861496	0.970746	0.964332	1.06746	0.817615	0.845503	0.657938	0.742785	0.909282	0.944563	0.119527
COF1_HUMAN	0.966735	1.004	1.01601	1.01099	1.00086	0.935545	1.03933	1.02041	0.935086	1.00463	0.99521	1.07012	0.75718	0.497145	0.948419	1.0029	0.851537	0.99877	0.784613	0.948559	0.919781	0.858311	0.276614
COMD2_HUMAN	1.17278	1.42066	0.955071	1.12969	0.953818	0.977319	0.905783	0.941466	1.02151	0.906169	1.16051	1.35487	1.17545	1.42614	1.1655	1.04136	1.09067	1.10506	0.934715	1.08723	0.991017	1.04124	-0.371472
COMD4_HUMAN	1.10799	0.956144	1.03971	1.11824	0.839386	0.900386	1.08709	0.75729	1.03884	0.825371	1.01551	1.06191	0.841639	1.48412	1.00727	1.107	1.00771	1.04106	0.9614	1.14364	0.9949	0.814156	-0.309707
COMD9_HUMAN	0.93109	0.863571	0.894336	0.827828	1.02893	0.836005	1.05738	0.909939	1.02702	1.11462	1.26865	1.25533	0.882685	1.21692	0.992431	1.02964	0.901888	1.01913	0.872457	1.03774	0.962637	1.00269	-0.633922
COMT_HUMAN	1.14069	1.25293	1.05392	1.1021	1.08008	1.09758	1.08495	1.10199	1.14784	1.01673	0.99583	1.05955	1.08982	1.10366	0.999878	0.947098	1.08532	0.911325	0.958465	0.562419	0.883422	0.981614	0.146083
COPA_HUMAN	0.94375	0.885383	0.908057	0.865284	0.912468	0.854268	0.916575	0.842557	0.865501	0.830249	0.844578	0.88277	0.763777	0.901535	0.925457	0.946283	0.888883	0.90367	0.76565	0.652527	0.867769	0.861471	0.381084
COPB_HUMAN	0.92893	0.902178	0.897596	0.876567	0.977635	0.910912	0.986375	0.956543	0.940057	0.979247	0.92225	0.960174	0.781513	0.864322	0.923953	0.950556	0.880284	1.01863	0.864132	1.07643	0.887628	0.820866	0.031043
COPB2_HUMAN	0.94331	0.857173	0.899857	0.855137	0.979384	0.923297	0.957874	0.933164	0.873331	0.894704	0.892601	0.947737	1.04574	1.15188	0.938961	1.00757	0.910653	0.978894	0.896097	1.19439	0.976577	0.963307	-0.239977
COPD_HUMAN	0.999011	0.930686	0.976186	0.921141	0.970645	0.963981	0.97867	0.9871	0.975788	1.02935	0.960651	1.06898	0.887824	0.817886	0.957737	1.02618	0.881075	0.956973	0.884609	1.25453	0.937614	0.921664	-0.102434
COPE_HUMAN	0.944335	0.878033	0.918618	0.918998	0.89828	1.01067	0.976494	0.938773	1.03649	0.979187	0.954257	1.18463	1.10728	1.53468	0.955163	1.01584	0.945416	1.01678	1.02299	1.52457	1.00734	0.960379	-0.571199
COPG1_HUMAN	0.950383	0.91602	0.933058	0.894177	0.969809	0.923828	0.980841	0.924911	0.954821	0.98759	0.927849	0.94584	0.787464	0.92175	0.900271	0.968181	0.88552	0.993039	0.892511	1.07148	0.903307	0.897383	-0.0404784
COPG2_HUMAN	0.839652	0.870988	1.02457	0.943884	0.921677	0.870914	0.915506	0.953813	0.926098	0.925401	0.825916	0.899066	0.820821	0.920048	0.856495	1.09563	0.872685	0.92304	0.829147	1.16578	0.820913	0.842756	0.0673063
COPZ1_HUMAN	0.89759	0.89105	0.771068	0.804885	0.886013	0.896894	0.913938	0.859175	1.00308	0.900906	0.950571	0.96751	0.843316	0.852525	0.865628	0.936029	0.894	0.912052	0.865217	1.09677	0.846883	0.914072	-0.160757
COQ8A_HUMAN	1.10899	1.24442	0.805384	1.11375	1.06234	1.04617	1.35254	1.11398	1.04804	1.1557	1.35757	1.20509	0.95558	1.3021	1.07359	1.0976	1.26876	0.989982	0.996629	0.906458	1.39418	1.54735	-0.172196
COQ9_HUMAN	1.27238	1.36843	0.939562	1.15459	1.23445	1.52297	1.38499	1.27944	1.22157	1.35101	0.948604	1.70586	1.74277	2.64673	1.16897	1.01597	1.1659	0.953368	1.09869	1.25016	1.04156	1.14814	-0.513384
COR1A_HUMAN	0.94158	0.868779	1.02099	0.950812	0.984395	0.955283	0.96469	0.992287	0.917932	0.84512	0.914129	0.865744	0.737542	0.515266	0.921852	0.9743	0.846399	0.933839	0.807874	0.883934	0.947736	0.84658	0.499644
COR1B_HUMAN	0.897164	0.848257	0.891895	0.898057	0.982418	0.958619	1.02778	0.993941	0.944228	0.825117	0.86711	0.843938	0.750727	0.558603	0.969781	1.00224	0.831143	1.00286	0.732712	0.769433	0.951558	0.82603	0.60658
COR1C_HUMAN	1.02333	1.03651	1.06267	1.03336	1.07895	1.03313	1.04805	1.03515	1.0175	0.875771	0.948856	0.914461	0.776478	0.430864	0.978925	0.995222	1.00402	0.963842	0.947744	0.628101	0.977945	0.968094	0.569937
CORO7_HUMAN	0.897162	0.923062	0.82916	0.945657	0.976432	0.910086	0.987708	0.947885	1.05172	1.05177	1.04984	1.04728	0.860197	0.720973	0.928211	1.03212	0.884635	0.98388	0.760479	0.915371	0.835302	0.879963	0.0820805
COTL1_HUMAN	0.910614	0.903794	1.08488	0.907437	1.04827	0.900072	1.01728	0.982315	0.935084	0.864914	1.03901	1.03208	0.681113	0.375476	0.881805	0.997722	0.827457	0.966287	0.690826	0.754239	0.886497	0.821409	0.305264
COX17_HUMAN	1.06785	0.949854	1.06802	1.23294	1.15077	1.13974	1.02413	1.3557	1.39444	1.32692	0.891381	0.98525	1.41916	1.42212	0.97749	1.0254	0.907412	0.895321	0.696857	0.730964	1.11654	1.1574	0.00816725
COX2_HUMAN	1.21106	1.25735	1.01693	0.910252	0.803236	0.782008	0.972717	0.785305	1.05391	0.908079	1.07087	1.161	0.964928	0.988603	0.896391	0.887559	1.09416	0.941842	0.759045	0.512005	0.948396	0.942402	0.0493533
COX41_HUMAN	1.23299	1.24013	1.15968	1.17503	1.10248	1.25757	1.1977	1.13883	1.35053	0.998958	0.887875	0.852959	1.21948	1.34976	1.10378	1.03091	1.1011	0.971064	1.00334	0.832735	1.13612	1.15025	0.318683
COX5A_HUMAN	1.1311	1.24788	1.14272	1.14039	1.01599	1.184	1.14554	1.10196	1.26999	1.26378	1.18678	1.14236	1.6219	2.3196	1.03707	1.0252	1.19301	1.14606	1.18257	1.16633	1.09844	1.1629	-0.457257
COX5B_HUMAN	1.25554	1.15351	1.19666	1.29469	0.840609	1.4705	1.54838	1.28428	1.33982	1.20737	1.12674	1.09603	1.3214	2.10108	0.881056	1.15492	1.02103	0.903842	0.810371	0.88546	1.19043	1.29386	-0.286037
COX6C_HUMAN	1.017	1.07149	1.07661	1.066	1.10965	1.19019	1.14689	1.06141	1.32141	1.03542	0.919848	0.925927	1.07391	1.44353	1.10243	0.972683	1.04669	0.936648	0.814105	0.5461	1.0366	1.13311	0.104838
CP062_HUMAN	0.8726	0.861578	1.0002	0.917661	1.10522	1.11322	1.08327	1.00759	0.910458	0.854281	0.89979	0.94009	0.929346	0.895099	1.09787	1.02651	1.03782	1.1012	0.940342	0.962725	0.963441	0.931502	0.381244
CP2S1_HUMAN	1.26576	1.22088	0.991992	0.963664	1.01279	1.03491	1.03193	1.02752	1.50453	1.16485	1.04238	0.928536	0.965447	0.945466	0.9934	0.987612	1.0557	0.825703	1.04847	0.658061	0.81027	0.924889	0.228437
CPIN1_HUMAN	0.915512	0.769856	0.938181	0.948384	1.10551	1.02739	0.918914	0.936649	1.23847	1.23344	1.3614	1.13926	0.771485	0.653682	0.915312	1.22838	0.94333	1.11059	1.01476	0.96216	0.906228	0.95494	-0.132181
CPNE1_HUMAN	1.00876	0.831309	0.994804	0.88084	0.936269	0.922019	1.02884	0.884609	1.05896	1.10782	1.18846	1.10287	0.933411	1.18168	0.90182	0.960695	0.81924	0.95301	0.752241	0.99818	0.865577	0.859265	-0.570228
CPNE2_HUMAN	0.946524	0.822236	0.677802	0.896729	0.949041	0.880136	1.01914	0.839592	0.94284	1.05557	1.03765	1.27091	1.28975	1.61199	0.892825	0.929773	0.871204	0.876925	1.20107	1.38012	0.821531	0.880773	-0.666559
CPNE3_HUMAN	0.924827	0.944819	0.874095	0.885189	0.894341	0.7626	1.02337	0.920029	0.960126	1.06566	1.1298	1.0923	0.933328	0.968565	0.890389	1.00309	0.863188	0.991236	0.761478	0.932952	0.867424	0.733418	-0.303329
CPNS1_HUMAN	0.99832	0.926801	0.990769	0.997421	1.01638	0.955609	0.964629	0.92603	1.00807	0.895357	0.954394	1.08856	0.792048	0.83403	0.845175	0.947554	0.846007	0.979906	0.813157	0.981265	0.822974	0.7939	-0.100738
CPPED_HUMAN	1.06083	0.929163	0.927513	1.05507	0.980322	0.826294	0.980581	0.866677	0.960131	0.957639	1.13362	1.02672	0.722542	0.475747	0.882625	0.950918	0.761042	0.854204	0.48112	0.600369	0.937385	0.840234	0.208761
CPSF1_HUMAN	0.946013	1.09716	1.01536	0.957447	0.978116	0.999403	0.915656	0.944123	0.941176	0.806384	1.08453	1.09865	1.11508	1.2062	1.00935	0.982202	1.0763	1.0762	1.04822	1.07786	1.00974	1.11189	-0.390684
CPSF2_HUMAN	0.962457	0.992945	0.949437	1.0339	0.941036	1.0084	0.932499	0.981087	0.965445	1.01264	1.24912	0.990875	1.2517	1.08897	1.07175	0.982962	1.21835	1.20041	1.23946	1.23877	1.23223	1.24943	-0.208243
CPSF3_HUMAN	1.07543	1.06611	1.01553	0.930646	1.01365	1.03512	0.947277	0.998197	0.880146	0.843591	0.810155	0.81272	0.979132	1.00843	0.946521	0.914774	0.937412	0.917221	1.06913	1.16482	1.05536	1.13528	0.218336
CPSF5_HUMAN	0.951072	0.974337	1.07199	1.00184	1.11489	1.17394	0.989139	1.14365	0.94866	0.956513	1.09193	1.17086	1.39446	1.77034	1.11297	1.00244	1.02212	0.982024	1.14656	1.14717	1.16498	1.1141	-0.542492
CPSF6_HUMAN	0.975412	0.945431	0.945415	0.967819	1.07538	1.13269	1.0096	1.08346	1.05764	0.944214	1.02779	0.932844	1.30779	1.44618	1.0469	0.99228	1.13869	1.02702	1.41868	1.42673	1.23786	1.20194	-0.297321
CPSF7_HUMAN	0.911424	0.891686	0.912715	0.860765	1.01201	1.05248	0.896156	0.986121	1.01227	1.05494	1.13868	1.03073	1.26561	1.35414	1.05531	1.00925	1.1347	1.02716	1.27649	1.35215	1.21945	1.22063	-0.443741
CPT1A_HUMAN	1.19906	1.1538	1.11493	1.10736	1.05048	1.13007	0.997509	0.9953	1.21747	1.10924	0.938048	0.98722	1.06443	1.07995	1.00171	0.962367	1.06676	0.875671	0.956021	0.546541	0.950619	1.0018	0.211095
CPT2_HUMAN	1.17808	1.24376	1.1923	1.16141	1.09089	1.21883	1.10247	1.11685	1.29179	1.31474	1.1789	1.2403	1.54057	2.25975	1.1586	1.03913	1.18274	1.03797	1.20496	1.12817	1.13444	1.21628	-0.495426
CPVL_HUMAN	1.11881	1.13981	1.14868	1.16427	0.838669	1.14989	1.26729	1.31778	0.92502	1.77004	1.12368	0.882453	1.20891	1.73761	0.973133	0.837927	1.14857	0.832314	1.46183	1.28208	1.07488	1.19845	-0.395157
CREL2_HUMAN	0.940647	1.0417	0.99955	1.08955	0.885082	0.966786	0.837197	1.09223	0.911615	0.776828	0.885184	0.944027	1.32586	1.8984	0.975353	0.9683	1.03224	1.00912	1.37085	1.51096	1.09343	1.18252	-0.374727
CRKL_HUMAN	0.924405	0.930255	0.995069	0.911759	1.03061	0.931915	1.07019	1.02443	1.02569	1.11162	1.2179	1.29515	0.822939	0.558377	1.04435	1.08286	0.905897	0.950157	0.909153	1.41915	0.896956	0.914456	-0.18443
CRTAP_HUMAN	1.04373	0.985278	0.913378	0.988023	0.957106	0.989787	0.860943	0.920217	0.688422	0.756725	0.920765	0.874477	1.15954	1.42303	1.00538	0.918746	1.06689	0.992825	1.12906	1.05329	1.09864	1.22543	-0.188579
CSDE1_HUMAN	0.934361	0.880982	0.998075	0.92518	1.04316	1.05849	1.03402	1.06698	1.0341	1.02396	1.03511	1.03503	0.869146	0.88286	0.879917	0.953014	0.797652	0.943498	0.889542	1.18248	1.10363	0.943379	-0.251941
CSK_HUMAN	0.98903	0.865479	0.873737	0.874831	0.89022	0.883601	1.02046	0.890903	0.901978	0.972175	0.982621	1.04006	0.733041	0.638646	0.94457	1.01292	0.829528	0.959343	0.709473	0.976021	0.914586	0.874184	0.150671
CSK21_HUMAN	1.03675	1.00074	0.87281	1.02401	1.01228	1.06506	1.04569	0.969398	1.09782	1.04408	1.21154	1.22104	1.15487	1.37011	0.983869	1.00295	0.944438	1.02434	0.923003	0.903002	1.03381	1.054	-0.626976
CSK22_HUMAN	1.03377	1.08792	0.889766	0.973989	0.994859	1.06297	1.05015	0.920487	1.09246	0.824275	0.850941	0.820722	0.948337	0.995147	0.965418	0.99194	0.945445	0.990254	0.741229	0.696733	0.877447	0.883619	0.506316
CSK2B_HUMAN	0.935295	1.20904	1.14397	1.07832	1.06411	1.27674	0.93919	1.04328	1.07537	1.35409	0.975582	1.36602	1.03165	2.11884	0.87626	1.04967	0.816669	0.892667	1.06861	1.32536	1.20721	1.22829	-0.642157
CSN1_HUMAN	0.929896	0.815238	0.835502	0.855809	0.900267	0.826154	0.886593	0.944548	0.699567	0.821545	0.75903	0.806554	0.662109	0.774169	0.849047	0.9317	0.917141	0.933578	0.740721	0.655531	0.895845	1.11113	0.441656
CSN2_HUMAN	0.86638	0.894375	0.763263	0.862972	0.853786	0.932744	0.944551	0.883792	0.87791	0.920411	1.04768	1.05172	0.834237	0.683418	0.942151	1.00469	1.12049	1.0941	0.893876	0.751152	0.997433	1.03006	0.180319
CSN3_HUMAN	0.957733	0.908755	0.842185	0.928038	1.0092	0.887092	0.961955	0.986629	0.893312	0.827808	0.804617	0.887724	0.789759	0.964604	0.919261	0.969645	0.873414	0.899119	0.813188	0.698162	0.844227	0.82856	0.349679
CSN4_HUMAN	0.892645	0.891578	0.881974	0.865562	0.977854	1.05091	0.853602	0.938407	0.825206	0.852031	1.0249	1.00046	0.848847	1.16135	0.891006	0.871374	0.953611	0.939244	0.91329	0.899509	0.920685	0.901882	-0.583465
CSN5_HUMAN	0.85823	0.801925	0.771121	0.753222	0.993215	0.964917	0.979397	0.902521	0.952253	0.878814	0.86087	0.991461	0.82887	1.12298	0.96051	0.885659	0.928946	0.957794	0.771795	0.732379	0.937527	0.908676	-0.100748
CSN6_HUMAN	0.920888	0.944826	0.989242	1.06559	0.939539	0.952172	0.881969	0.87696	0.864918	0.954167	0.963399	0.904783	0.800652	1.29513	0.924418	0.996759	0.894415	1.01122	0.795329	0.600185	0.947676	0.996679	-0.111177
CSN7A_HUMAN	0.900903	0.870179	1.01289	0.891944	0.846579	0.8505	0.997197	0.886371	0.742746	0.929715	1.25896	1.20961	1.05453	1.27202	1.19583	0.989409	1.18865	1.31229	1.35722	1.14294	1.28153	0.997788	-0.385813
CSN7B_HUMAN	0.907205	0.825185	0.930119	1.01503	0.93781	0.923161	1.00286	0.978396	1.10799	1.00849	1.10393	1.25264	0.986465	1.35964	0.997984	0.993634	1.04025	1.23344	1.12958	1.18341	1.00308	1.02721	-0.624462
CSRP1_HUMAN	0.928634	0.868382	1.06518	1.07046	1.09541	1.10827	1.09277	1.07021	1.18225	1.16181	0.877899	0.829121	0.654653	0.465078	0.879085	1.00618	0.823809	0.98558	0.869888	0.917748	0.857383	0.804601	0.383211
CSTF1_HUMAN	1.04655	1.0535	1.04718	1.05325	0.9918	1.08981	0.957527	0.954261	0.956802	0.757933	0.865051	0.807708	1.21898	1.1621	0.990459	1.00653	0.883472	0.994195	1.21093	1.16883	1.01978	1.0948	0.068245
CSTF2_HUMAN	1.00265	1.03424	1.04697	1.0434	1.0532	1.12875	0.931188	1.07054	1.09674	0.927361	1.08227	1.0024	1.26195	1.23121	1.11267	1.05434	0.979724	0.990904	1.24154	1.34535	1.08667	1.16343	-0.317217
CSTF3_HUMAN	1.17678	1.03652	0.870978	0.962856	1.13463	1.23691	1.01945	1.22513	1.04405	0.941665	1.1217	0.952851	1.04738	0.897444	0.94465	0.933819	0.906611	0.848451	1.03631	0.813768	1.09803	1.11853	0.0512142
CTBL1_HUMAN	1.08071	1.03517	0.904417	0.990575	0.902447	0.95078	0.938697	1.04227	1.03179	1.05456	0.919803	1.07464	0.802053	0.827039	0.954679	0.998859	0.920918	0.813511	0.841179	0.879278	0.920626	0.958554	0.109353
CTBP1_HUMAN	0.853604	0.87523	0.968996	0.911035	0.971911	0.996106	0.889663	1.02954	0.963911	0.953435	1.00748	0.968542	0.831875	0.841681	0.913122	0.940843	0.966567	0.96117	1.22967	1.37653	0.96246	1.01517	-0.232441
CTCF_HUMAN	1.71561	1.585	2.22789	2.34168	1.90941	1.62623	1.60024	2.00795	1.96654	2.77142	1.37301	1.52665	1.31189	1.05285	1.02293	1.04657	1.05629	0.930413	1.06786	1.50067	1.00402	1.32	-0.0670485
CTND1_HUMAN	0.98741	0.945507	0.923439	0.894526	1.05091	0.957711	1.01024	0.904518	0.896007	0.612741	0.619224	0.675936	0.928372	0.942169	0.939452	0.982467	0.836162	0.835037	0.969268	0.849331	1.19476	1.09236	0.530049
CTR9_HUMAN	1.03762	1.08073	1.08374	0.965803	1.04753	1.08515	0.974889	1.08385	0.976405	1.09346	1.01515	0.859612	0.977098	0.841922	1.01951	0.983172	1.05538	1.02325	1.16688	0.810457	1.33828	1.36334	0.335553
CUL1_HUMAN	0.779336	0.799582	0.804846	0.785062	0.966355	0.900256	1.05238	0.838202	0.890954	0.679287	0.724907	0.56123	0.611761	0.615704	0.774508	0.922978	1.07103	1.06782	0.755933	0.557957	0.996961	0.750675	0.678885
CUL2_HUMAN	1.00431	1.12317	1.07238	1.0281	0.926846	0.884319	0.901811	0.936506	0.896772	0.852123	0.939562	0.837694	0.735685	0.817785	0.831235	0.987468	0.864277	1.04057	0.888429	0.724644	0.84349	0.987079	0.387158
CUL3_HUMAN	0.983352	0.893241	0.873291	0.854922	0.909018	1.04142	0.933785	0.901471	0.753044	0.660144	0.968448	0.81769	0.777224	0.732547	1.05663	1.04415	0.845064	0.967784	0.733859	0.567159	0.779814	0.818087	0.403836
CUL5_HUMAN	0.877408	0.833105	1.09971	0.922663	0.81683	0.937427	0.955847	0.957788	0.8541	0.878169	0.946415	0.897614	0.705059	1.00703	1.04518	1.18964	1.02443	1.03069	0.927745	0.646892	0.903468	0.837199	0.214604
CUTA_HUMAN	1.01957	0.938395	0.866062	0.975951	1.02985	0.880824	1.04212	0.958651	0.925444	0.960417	0.824143	0.970906	0.78495	0.6349	0.907981	1.00766	0.895705	1.07771	0.911809	1.33128	0.888249	0.88136	0.249312
CWC15_HUMAN	0.931509	0.923759	0.88542	0.927054	0.948489	0.975517	0.829142	1.00376	0.888244	0.784512	1.0966	1.03777	0.950589	0.789607	0.949829	0.869773	1.02709	1.0234	1.11479	1.25648	1.25274	1.30341	-0.120384
CWC22_HUMAN	1.16016	0.83524	0.738604	0.914978	0.860378	0.878236	0.845116	0.874414	0.934933	1.24587	1.19619	0.850329	1.26758	1.04838	1.45215	1.24724	1.54772	1.63889	1.5376	1.47858	1.44438	1.03628	0.114717
CX6B1_HUMAN	0.969365	1.23155	0.903144	1.0209	0.930419	0.979392	0.961999	0.999507	0.795495	0.757803	0.960564	1.14931	1.32447	1.55237	1.01405	0.959717	1.02459	1.00562	0.978203	1.02736	1.23426	1.39852	-0.268902
CY1_HUMAN	1.17439	1.24527	1.03214	1.06914	1.05078	1.12337	1.11525	1.09374	1.26101	1.14116	0.81824	0.71206	1.39417	1.57646	0.999153	0.978157	1.01862	0.968779	0.860963	0.818767	1.09565	1.10268	0.165405
CY24A_HUMAN	1.01423	0.964534	1.07695	0.875677	0.885608	0.994896	1.07604	0.814907	1.13328	0.923535	1.01188	1.19994	0.841822	0.820212	0.812505	0.948319	0.866424	0.913965	0.983272	0.718069	1.10398	1.22777	-0.0854847
CY24B_HUMAN	1.09085	1.10212	1.04953	1.07107	0.971666	1.03095	1.15227	1.1025	0.940453	0.796094	0.806711	0.838389	1.02598	0.784816	1.07411	0.986059	1.01437	0.948418	0.900342	0.642839	0.98557	0.998913	0.700804
CYB5B_HUMAN	1.25463	1.46155	0.699879	1.15621	0.825855	0.670058	0.689908	0.739044	1.0149	0.935793	1.1587	1.20211	0.89817	0.907987	0.823163	0.893871	0.986214	0.880114	0.944073	0.8947	0.952067	1.04155	-0.140223
CYBP_HUMAN	0.911852	0.895121	0.974246	0.94125	1.02991	0.966966	1.04583	1.01707	1.06164	0.978546	0.910245	0.917238	0.751565	0.528306	0.906614	0.988048	0.827398	0.993867	0.84915	1.04042	0.936708	0.95161	0.396592
CYFP1_HUMAN	0.954522	0.861266	0.917398	0.91783	0.977277	0.891633	0.98333	0.941823	0.901239	0.934427	0.955281	0.920044	0.742113	0.765072	0.93042	0.98929	0.933576	1.0135	0.8596	0.728099	0.914732	0.907823	0.402776
CYTB_HUMAN	0.884569	0.899557	0.890588	0.928572	0.943403	0.839793	0.965441	0.806407	0.828287	0.723716	0.937153	0.846347	0.511541	0.312605	0.847814	1.02633	0.757128	1.00284	0.700869	0.990078	0.938372	0.846431	0.394447
CYTC_HUMAN	1.41444	1.0914	1.60514	1.52761	1.0164	1.00498	0.99368	1.02713	0.951347	0.810635	0.708012	0.647488	0.717336	0.814303	1.00255	1.04171	1.07227	0.929836	1.28213	1.6363	1.19821	1.14057	0.293474
DAAF5_HUMAN	0.974016	0.92955	1.11517	0.906505	0.858915	0.686888	0.906653	0.78501	1.033	0.959065	0.924642	0.970384	0.658529	0.845045	1.04819	1.05122	0.813644	1.28579	0.979822	0.871721	0.961978	0.835703	0.225545
DAB2_HUMAN	0.854708	0.974452	0.804186	0.948057	1.03202	1.05167	1.09842	1.01162	1.17614	1.30101	1.23795	1.29157	0.723225	0.647793	0.948174	0.897399	0.892979	0.94065	0.814807	0.819571	0.903366	1.00012	-0.199007
DAD1_HUMAN	1.05862	1.2024	1.22625	1.12731	1.0877	1.2183	1.14026	1.0979	1.12742	1.17637	1.12768	1.34234	1.0281	1.06945	1.3915	1.2473	2.03512	1.10493	1.50745	1.41303	1.29381	0.89958	0.0315277
DAZP1_HUMAN	0.977502	1.01186	0.979478	1.04692	1.10613	1.10751	1.01163	1.14631	0.909164	0.835084	0.952763	0.856821	1.19155	1.06651	0.971958	0.99828	1.04571	0.995199	1.28395	1.41065	1.08516	1.05213	-0.0261634
DBLOH_HUMAN	1.03038	0.893486	1.11482	1.01671	1.05071	1.22103	1.0038	1.09152	1.0123	1.15543	1.23523	1.00952	1.40922	1.54643	1.03256	0.943625	1.05786	0.923526	1.22241	1.01162	1.14222	1.04466	-0.53715
DBNL_HUMAN	0.974932	0.872347	1.02399	0.975308	0.966274	0.912025	0.950192	0.931006	0.882519	0.867786	0.829028	0.83195	0.764148	0.805449	0.896891	0.970763	0.799093	0.926914	0.758083	0.779087	1.00863	0.906531	0.508493
DC1I2_HUMAN	0.780826	1.05376	1.03739	0.968348	1.13131	1.14706	1.01285	1.15401	0.872991	0.618625	0.791657	0.65719	0.94789	1.11107	0.879378	0.897516	0.842543	0.950944	0.84087	0.643674	0.844911	0.77531	0.278511
DC1L1_HUMAN	0.852282	0.829682	1.00181	0.884643	1.04424	0.832123	0.993938	0.887727	1.01472	1.02675	0.89862	0.898665	1.04285	1.11784	0.973067	1.07916	0.855874	1.06025	0.820427	0.737808	0.87145	0.86399	0.130045
DCAF8_HUMAN	0.841561	0.958614	0.784354	0.943998	0.896363	0.928954	0.926475	0.874518	0.991446	1.12558	0.910575	1.05656	0.874373	0.899555	0.888339	0.881462	0.951275	1.16887	0.823114	0.770336	1.11685	1.35571	0.0425381
DCP1A_HUMAN	0.940781	0.918067	1.00191	1.07835	1.12379	1.01345	1.05121	1.0443	1.17978	1.32561	1.30844	1.23037	1.06794	0.969582	1.01942	1.07688	0.857269	1.07861	1.16031	1.51558	0.999163	1.03384	-0.506962
DCPS_HUMAN	0.962546	0.905214	0.981952	0.900882	1.02928	0.907465	1.0186	0.925858	0.787504	0.908497	1.00939	1.0088	0.831758	0.6157	0.984378	1.07785	0.864074	0.961813	0.749572	0.841594	0.902157	0.887562	0.31116
DCTD_HUMAN	0.932642	0.912023	0.903281	1.0014	0.959329	0.769112	0.942599	0.863249	0.968092	1.01942	0.810275	1.02301	0.63037	0.482046	0.857007	1.03524	0.824204	1.00023	0.832053	0.913898	0.987459	0.971216	0.362249
DCTN1_HUMAN	0.881827	0.956764	0.658026	0.915155	0.965163	0.938922	1.0169	0.946899	0.932685	0.820008	0.882781	1.18909	0.966095	1.02397	0.844813	0.971785	1.027	1.1647	0.850597	0.975271	0.945108	0.947361	-0.152132
DCTN2_HUMAN	0.933653	0.88061	0.97571	0.95834	0.982368	0.865383	0.929574	0.899111	0.853237	0.715806	0.93208	1.11596	0.967242	1.37796	0.924379	1.01646	0.884728	0.877226	0.836624	1.04459	0.933397	1.04211	-0.448577
DCUP_HUMAN	0.87395	0.841951	0.937846	0.858483	1.0281	0.907805	1.00817	0.983334	0.900369	0.87316	1.05909	0.932601	0.790856	0.496767	0.913043	1.09044	0.863132	0.969608	0.700076	0.678099	0.872942	0.783059	0.372999
DCXR_HUMAN	1.02335	0.997436	1.04576	1.01989	0.973722	1.12635	0.969196	1.01059	1.1523	0.870298	1.057	1.05909	1.34365	1.67606	1.0483	1.05271	1.02423	0.948496	0.925627	0.939576	1.13261	1.1621	-0.330197
DD19A_HUMAN	0.949212	0.843942	0.845067	0.867909	0.879519	0.871594	0.988865	0.872081	0.733031	0.77827	0.781629	0.686639	0.69381	0.730467	0.948509	1.16323	0.811056	0.96997	0.750705	0.77661	0.864539	0.844657	0.645772
DDB1_HUMAN	0.932023	0.917087	0.952482	0.96271	0.992063	1.00401	0.960391	0.967018	0.946459	0.861565	0.960984	0.957812	0.92964	0.847795	0.993088	0.963628	0.978025	0.974464	0.850507	0.702208	1.0412	1.07172	0.385955
DDRGK_HUMAN	1.0982	1.19603	1.20657	0.95561	1.0337	1.14485	1.12718	1.09768	1.16217	1.09775	1.10764	1.09851	1.05872	0.762012	1.02642	0.965016	1.17092	0.918631	1.29542	0.894285	0.913157	1.04339	0.1264
DDX1_HUMAN	0.969519	0.976703	0.985145	1.00937	1.02685	0.994516	1.05664	1.01843	1.0184	1.0968	1.16346	0.973139	1.1645	1.19651	1.04241	0.939967	1.00159	1.02243	1.05038	1.37537	0.963156	1.0346	-0.467308
DDX10_HUMAN	1.22895	0.985431	1.60151	1.11018	1.07093	1.05819	1.10804	1.2337	0.847236	1.43068	1.17689	0.837193	1.12969	1.27748	1.05627	0.95109	1.29194	0.882184	1.04301	0.99106	1.08877	1.07186	-0.0528092
DDX17_HUMAN	0.966931	0.997004	0.9667	0.986131	1.03442	1.0787	0.948136	1.03491	1.0468	0.999137	1.04675	0.933793	1.41869	1.05629	1.05244	0.998583	1.00162	0.932786	1.11442	1.18071	1.1032	1.16796	-0.0740263
DDX18_HUMAN	0.920823	0.845156	0.994801	1.04474	0.992651	1.03828	0.959421	1.06291	1.05507	1.28033	1.30395	1.08426	1.31026	0.934795	1.25225	1.0367	1.21793	1.12612	1.22101	0.941712	1.13463	1.07807	-0.118724
DDX21_HUMAN	1.23341	1.30845	1.12508	1.0853	1.11794	1.20462	1.0673	1.08011	1.1305	0.783967	0.965725	0.80809	1.03693	1.14677	1.02258	0.998959	1.04539	0.855176	0.722501	0.412035	0.850907	0.97473	0.332731
DDX23_HUMAN	0.869681	1.09755	0.774254	0.873466	1.05825	1.18869	0.972355	1.12391	0.996833	0.847749	0.839918	0.759287	1.14749	0.992803	1.02845	0.999078	1.17016	1.15568	1.22055	0.936171	1.07805	1.25789	0.378228
DDX27_HUMAN	1.01421	1.04337	0.855742	0.921664	0.933002	1.05068	0.885789	1.0463	1.08592	0.945306	1.02127	0.680513	1.1024	0.95538	1.04147	0.988893	1.0378	0.954414	1.06204	0.733659	1.0806	1.21796	0.425805
DDX3X_HUMAN	0.966054	0.938761	0.991451	0.986037	1.02147	1.01838	0.972599	1.01592	1.00116	0.985628	1.01965	0.991405	0.807057	0.790097	1.00988	1.02637	0.928574	0.973121	1.12096	1.34041	1.006	1.03308	-0.0492984
DDX3Y_HUMAN	1.03017	1.07011	1.02217	1.01599	0.999809	0.964594	0.956157	0.965917	0.762235	1.15465	1.23899	0.882801	0.840237	0.886766	0.964118	0.966137	0.945104	0.996356	1.05634	1.25324	1.02589	1.15051	-0.19532
DDX41_HUMAN	1.05178	1.08102	0.939842	0.973728	0.916949	0.974747	0.882645	1.04817	1.04524	1.17724	1.16126	0.842391	1.05725	0.75174	1.02398	0.951313	1.0055	0.793906	1.026	1.00075	1.01052	1.05716	0.14558
DDX42_HUMAN	1.11681	1.06473	1.07503	1.08408	1.02487	1.11104	0.997937	1.05983	1.01817	0.850828	1.11004	0.921434	1.20621	0.613271	1.10844	1.06629	1.102	1.00808	1.22155	1.16309	1.10633	1.25086	0.369108
DDX46_HUMAN	0.927865	0.95747	0.996523	0.934495	1.05434	1.07723	0.951464	1.04011	0.985537	0.892112	1.10503	0.899364	1.12759	1.0771	1.02589	0.971837	1.01277	0.956269	1.17124	1.41598	1.10637	1.15605	-0.233226
DDX47_HUMAN	1.2838	1.14406	1.19339	1.39415	1.10635	0.958948	0.998707	0.953422	1.26515	1.05341	0.97765	0.823109	1.1189	0.934208	1.081	0.981374	0.947042	0.927377	0.756921	0.618614	0.805186	0.874246	0.387657
DDX5_HUMAN	0.930366	1.00753	0.910367	0.97415	1.02563	1.16259	0.971321	1.06332	0.993212	0.93069	0.974209	0.89286	1.43514	1.15858	1.01492	0.985402	1.02322	0.976768	1.18195	1.24615	1.04308	1.14705	-0.109999
DDX50_HUMAN	1.30303	1.31238	1.2494	1.13477	1.06335	1.07029	1.00859	1.11115	0.974652	0.802343	0.968948	0.778599	1.04832	0.796287	0.98763	0.988978	1.11714	0.921666	0.963654	0.695442	1.10537	1.21681	0.55704
DDX54_HUMAN	0.931251	1.0232	0.795979	0.862197	0.991982	1.08907	0.952708	1.00603	1.09883	1.05775	0.757546	0.626755	0.991254	0.847883	0.992468	0.969747	1.08546	0.863446	1.09297	0.703395	0.991293	1.06128	0.59244
DDX56_HUMAN	0.888309	1.1101	0.836263	0.870845	0.952585	0.944383	0.905448	0.902541	0.869533	1.07813	1.04664	0.795377	1.06018	0.758006	0.961267	0.9988	0.968719	0.717542	1.13983	0.731103	0.962178	1.22101	0.192463
DDX6_HUMAN	0.900989	0.994486	0.841472	0.907635	0.988713	0.915746	0.901023	0.953613	1.03575	0.963539	0.999507	1.11734	0.972624	0.739388	0.966079	0.980431	0.926093	1.08306	1.05714	1.22841	1.01811	0.96536	-0.072314
DDX6L_HUMAN	1.31145	1.49956	1.43332	1.43686	0.78759	0.741772	1.01722	0.841334	1.05514	1.12673	1.30973	0.983769	0.828947	0.836092	0.842527	0.885201	1.20818	1.17945	0.923049	0.782032	0.807031	0.791288	0.10603
DECR_HUMAN	1.17918	1.18058	1.13725	1.1013	1.09971	1.22175	1.0839	1.18354	1.30907	1.18083	1.13686	1.30389	1.49735	1.92449	1.12636	0.982822	1.19838	1.04125	1.12595	1.28774	1.07614	1.2353	-0.53873
DEFI6_HUMAN	1.26186	1.01609	1.24853	1.08695	0.818242	0.8886	0.961619	0.830599	0.857893	0.627983	0.772101	0.773677	0.966608	0.802566	1.23498	1.03569	1.04255	1.31495	0.777064	1.01104	1.09823	0.880706	0.586619
DEGS1_HUMAN	1.32307	1.28061	1.28225	1.32764	1.08133	1.18366	1.12486	1.16325	1.15488	0.897059	0.936585	1.02103	1.025	0.864947	1.01411	0.906999	1.01183	0.886108	1.24658	1.16028	0.77084	0.972923	0.148616
DEK_HUMAN	0.744176	0.859853	0.830051	0.815264	0.900941	0.860246	0.819534	0.850024	1.01978	1.04569	1.01123	1.00481	0.899144	0.840586	0.850529	0.850704	0.885361	0.824338	0.83706	0.737263	0.820364	0.950832	-0.258117
DEST_HUMAN	0.91742	0.965007	0.948684	1.09286	0.914725	0.879881	1.03609	0.95516	1.06945	1.0578	1.07771	0.964034	0.724658	0.413602	0.940485	1.03154	0.82898	0.872273	0.706093	0.868986	1.07422	1.00503	0.318962
DFFA_HUMAN	0.974846	1.03574	1.55625	1.17296	0.997531	0.912589	0.986112	0.978323	0.954596	0.898669	1.09757	0.970235	0.787214	1.23609	0.927754	1.1215	0.914986	0.972501	0.758589	0.71151	1.2446	1.28662	0.00993949
DGKZ_HUMAN	1.09025	0.965436	1.1881	1.02795	1.01336	0.830644	1.01397	0.976132	0.731529	0.902191	0.983969	0.776339	0.908473	0.715546	0.983794	0.966269	0.893301	0.906163	0.814253	0.738201	0.964132	0.949339	0.492527
DHB11_HUMAN	1.02163	0.982686	0.937086	0.888011	1.00121	0.939657	0.925851	0.845999	0.830558	0.871802	0.862435	0.837974	0.934373	0.869604	1.02021	0.992339	1.08341	0.929422	0.940127	0.688659	0.999304	1.1063	0.560879
DHB12_HUMAN	1.11911	1.07588	1.00843	0.985349	0.991044	1.07571	1.02951	0.977389	1.16306	1.09332	1.03763	1.10597	1.13717	1.19776	0.984877	0.980634	1.12139	0.906051	1.18423	0.927988	0.843915	0.979599	-0.332914
DHB4_HUMAN	1.03259	1.00349	0.909455	0.913084	0.989153	1.00668	0.936099	0.963597	0.912813	0.932396	1.05277	1.09613	1.29091	1.42921	1.02649	1.00091	1.04102	0.966162	1.1537	1.06655	1.109	1.17957	-0.460835
DHC24_HUMAN	1.04385	1.13289	1.1162	1.05686	0.966139	1.15738	1.0317	1.06269	1.12745	1.01576	0.916315	1.00247	0.972562	1.11777	0.994564	1.08684	1.09707	0.919797	1.06139	0.749382	1.28435	1.17092	0.214495
DHE3_HUMAN	1.11467	1.18306	1.05905	1.10583	1.107	1.20043	1.10301	1.12055	1.3192	1.22069	1.11856	1.34255	1.5725	2.58475	1.08963	0.989586	1.15227	1.00283	1.04278	1.21379	1.05673	1.18751	-0.519974
DHRS4_HUMAN	0.94801	1.02723	0.959617	0.949133	0.984897	1.12709	0.992893	1.05448	1.08694	1.12677	1.09707	1.1641	1.40639	1.69448	1.22137	1.12911	1.5771	1.64162	1.8286	1.99268	1.01978	1.19843	-0.290516
DHRS7_HUMAN	0.829288	0.968146	1.01689	0.903232	0.979137	1.15722	0.986525	1.02119	1.47382	1.11551	1.22763	1.39394	0.927076	1.14273	1.02549	1.03282	0.983533	0.878541	0.902329	0.736041	1.11407	1.11529	-0.379468
DHSO_HUMAN	0.930652	0.882614	0.918963	0.852452	1.01272	0.882145	0.932257	0.851931	1.07017	1.11601	0.982361	1.13533	0.622605	0.498596	0.79676	0.831288	0.817968	1.0104	0.693039	0.611163	0.830636	0.868298	0.0947041
DHX15_HUMAN	0.99638	0.979992	0.977044	0.935225	0.985596	1.02754	0.925386	0.98432	0.980163	1.01242	1.01301	0.940426	1.20986	1.04104	1.04497	0.969384	1.07477	1.02866	1.20571	1.0129	1.09177	1.16334	-0.0110346
DHX30_HUMAN	1.16951	1.30158	0.92597	1.0668	0.889389	1.01736	0.971203	0.930076	1.43033	0.881968	1.19929	1.04509	1.02559	1.00976	1.08156	1.07825	0.919178	0.983383	0.951627	0.685169	0.997719	1.0442	0.130328
DHX36_HUMAN	1.05369	0.838255	0.829063	0.868874	0.835411	0.739518	0.724797	0.823238	1.02469	0.917044	1.64057	1.04518	0.809012	0.866045	0.979625	1.03125	0.792786	0.710372	0.898566	0.734185	1.01538	1.03399	-0.344794
DHX9_HUMAN	1.022	0.978417	0.989965	0.998661	1.00913	1.07877	0.923932	1.0265	1.02018	0.954755	0.978164	0.868384	1.11171	0.904702	1.03515	1.03517	1.04405	1.00449	1.13123	0.87108	1.08152	1.0466	0.476977
DIAP1_HUMAN	0.999612	0.91198	0.934553	0.943337	0.921667	0.861888	0.901583	0.849065	0.900987	0.913937	1.03521	1.0157	0.806607	0.757042	0.930233	0.969797	0.83984	0.94214	0.661293	0.536674	0.971186	0.882423	0.181681
DIC_HUMAN	1.3092	1.27386	1.02614	0.982695	1.13756	1.18637	1.22983	1.0942	1.38118	1.14967	1.10234	0.968507	1.26569	1.31631	1.02611	0.994076	1.13906	0.931304	1.00007	0.857155	1.17411	1.04096	0.0859977
DIDO1_HUMAN	1.5841	1.90261	1.70299	1.77837	1.42317	0.869561	1.21858	1.2463	0.617339	0.876351	1.01166	0.708269	1.56167	1.10759	1.33293	1.21767	1.09998	0.991321	1.26375	0.92226	0.900738	1.04033	0.354452
DJB11_HUMAN	0.930113	0.903117	1.00631	1.04202	1.0767	1.16491	0.994517	1.07659	1.06657	0.916052	0.997003	1.08286	1.35851	2.16495	1.0503	1.03628	0.991097	0.967962	1.28692	1.34351	1.13543	1.17708	-0.502002
DJC10_HUMAN	1.03404	0.969458	0.768793	0.900127	1.02979	1.04796	0.8717	0.89757	0.946193	0.841605	1.08225	1.12355	1.12176	1.46455	0.964721	0.920255	1.10575	0.986052	1.05442	0.693684	1.02845	1.09999	-0.3884
DJC11_HUMAN	1.13732	1.09877	0.958242	0.920148	0.979718	0.81765	0.930495	0.905201	1.14113	1.16865	0.971296	0.78297	1.16895	0.980914	1.01917	0.96454	1.21156	0.950936	0.894889	0.633195	1.06878	1.14894	0.445232
DJC13_HUMAN	1.04489	0.988518	0.726047	0.805856	1.02914	0.983757	0.995056	0.89881	0.90113	0.591364	0.756557	0.861422	1.03177	1.22886	0.943759	0.97709	1.02297	1.01081	0.8751	0.549801	0.911374	0.84335	0.236316
DKC1_HUMAN	0.99067	1.0458	0.972864	1.02528	1.04648	1.08886	0.934146	1.06482	1.00678	0.948034	1.02198	0.952928	1.11907	1.00006	1.12063	1.04065	1.12692	1.03298	1.03337	0.730962	1.09431	1.15891	0.35354
DLDH_HUMAN	1.15877	1.26587	1.17678	1.20881	1.16153	1.23007	1.13682	1.19547	1.33576	1.40817	1.10152	1.28197	1.77339	2.84067	1.11546	0.996728	1.19113	1.01437	1.23195	1.47774	1.00112	1.14166	-0.503436
DLRB1_HUMAN	0.9106	0.820151	0.86611	0.866324	1.03489	0.968035	1.10634	1.01732	0.959378	0.759586	1.00153	1.09511	0.870935	0.855775	0.962502	1.12147	0.747994	1.02271	0.798751	0.944547	1.00346	0.993387	0.024358
DNJA1_HUMAN	0.972	0.975218	1.1261	1.12974	1.06759	1.21401	1.02414	1.1417	1.42576	1.52345	1.30171	1.37482	0.99052	1.14082	1.06932	1.08137	0.932329	1.04627	1.6278	2.32785	1.0369	1.02735	-0.470832
DNJA2_HUMAN	0.971033	1.0636	1.10858	1.1123	1.10256	1.1434	1.23651	1.20247	0.937532	1.07675	1.06461	1.13107	1.37113	1.89064	0.985629	1.01041	1.10203	1.05012	1.22008	1.44745	1.04357	0.944736	-0.527363
DNJA3_HUMAN	1.16282	1.11175	1.06233	1.10736	1.08943	1.15409	1.11815	1.15847	1.28076	1.29982	1.39222	1.4676	1.60288	2.52704	1.18596	0.993768	1.20181	1.07801	1.17281	1.2688	1.15201	1.24153	-0.636681
DNJB1_HUMAN	1.00865	0.924947	1.10807	1.07063	1.18357	1.61098	0.951854	1.04671	2.24964	3.0137	2.15235	2.80866	0.834766	0.913569	0.945081	1.09232	0.85035	0.970245	1.65301	3.77149	0.970498	0.937439	-0.559954
DNJC3_HUMAN	0.992068	1.04289	1.08864	1.11689	1.02877	1.11958	0.927189	1.02742	0.979194	0.989529	1.04536	1.07452	1.41548	1.99024	1.08004	0.999295	1.0831	0.942449	1.27839	1.29138	1.12896	1.22558	-0.498239
DNJC7_HUMAN	0.853305	0.957211	0.972963	0.932138	1.03921	1.11399	1.00971	0.980512	1.26628	1.17141	1.05235	1.02701	0.927985	0.886968	0.921029	1.02424	0.872002	0.949366	0.91659	1.04764	1.10583	1.09745	-0.0908274
DNJC8_HUMAN	1.04231	1.01448	1.17152	1.01424	1.05002	1.10526	0.99468	0.973508	1.14314	1.03185	1.09224	0.963293	0.831299	0.863634	0.926187	0.968524	1.01465	1.00925	0.949135	0.916652	1.02759	1.01197	0.153364
DNM1L_HUMAN	0.936224	0.862135	0.93948	0.875967	0.92174	0.842934	0.933598	0.870942	0.963269	0.920882	1.05316	1.02113	0.783582	0.892606	0.924878	0.996943	0.806923	0.949808	0.722802	0.732085	0.860046	0.879654	-0.0668355
DNMT1_HUMAN	1.27827	1.34707	0.957805	1.07397	0.903471	1.03475	0.972064	1.09361	0.780439	0.811765	0.855245	0.977683	0.82137	0.746716	0.965847	0.861394	1.01018	0.85994	0.955579	0.996073	0.917719	1.06902	0.281151
DNPEP_HUMAN	0.878483	0.897427	1.1384	0.989608	0.984565	0.800808	0.898821	1.00243	1.00896	1.11366	1.19459	0.792126	1.0205	0.87636	1.03777	1.06793	0.858422	1.09825	1.38728	1.57085	0.932567	1.14572	-0.110735
DNPH1_HUMAN	0.977926	0.923142	0.970019	0.96845	0.921389	0.938508	0.956659	0.961528	0.862806	0.852022	1.05515	0.84085	0.779492	0.571408	0.983871	1.01909	0.798155	1.02932	0.687406	0.773673	0.981697	0.918596	0.458221
DNS2A_HUMAN	1.13564	1.09024	1.06495	1.03503	0.897703	1.12762	1.10128	0.993398	0.865431	1.02293	1.02603	0.943109	1.27098	1.62209	1.04495	1.07506	1.03654	0.754934	1.01665	1.23085	1.14039	1.18889	-0.339416
DOC10_HUMAN	1.02879	1.04738	1.05871	1.05487	1.03486	0.980383	1.01151	0.93243	0.995252	0.936621	1.02794	0.88237	0.850712	0.736366	0.94594	0.946128	0.983191	0.973399	0.913685	0.622405	0.922122	0.930672	0.455115
DOC11_HUMAN	1.0654	0.962321	1.14913	1.06398	0.853349	0.898008	0.877468	0.915085	1.12131	1.2539	1.24754	1.1406	0.962519	0.877658	1.11684	1.03297	1.19465	1.27727	1.02039	1.03507	0.847302	0.818038	-0.0958754
DOCK2_HUMAN	0.934397	0.940203	0.764977	0.838214	0.972847	0.865691	0.926631	0.848059	0.883736	0.831055	0.842558	0.883304	0.790116	0.839438	0.928024	0.93297	0.895728	1.02343	0.690957	0.63738	0.877722	0.858917	0.464605
DOCK8_HUMAN	0.918518	0.918862	0.895699	0.958424	0.972534	0.906281	0.969775	0.953336	0.867205	0.871843	0.92836	0.908507	0.839075	0.78871	0.938681	0.970734	0.975379	0.982947	0.8159	0.615704	0.918504	0.896928	0.477934
DOK2_HUMAN	1.14676	1.04608	1.29313	1.16183	1.08511	1.03777	1.00144	0.825673	1.5518	1.49702	1.33968	1.34564	0.797547	0.693004	0.931998	1.04971	1.04283	1.01779	0.967375	1.2234	0.821933	1.06059	-0.185688
DOK3_HUMAN	0.847395	1.17061	0.695277	1.2304	0.76791	0.700222	0.962078	0.739599	0.88933	0.590868	1.18159	0.96814	0.800447	0.892103	0.830171	0.943728	0.937512	1.00434	0.662548	0.911317	0.790114	0.890943	-0.0288622
DOP2_HUMAN	1.04605	1.00069	1.04614	0.995617	1.0909	0.912931	1.12161	1.00951	0.798486	0.93086	0.934185	1.00662	0.71439	0.947299	1.01933	1.06373	0.962581	1.08646	0.771436	0.732419	0.79802	0.81112	0.250007
DOPD_HUMAN	1.08482	1.05518	0.983049	0.981083	0.924939	0.798927	0.9466	0.894147	0.824001	0.805945	0.864767	0.689238	0.69094	0.424891	0.883823	0.994683	0.859581	0.965269	0.689213	0.832051	0.807742	0.834623	0.674882
DP13A_HUMAN	0.96545	0.86558	1.01643	1.00262	0.936728	0.884028	0.975481	0.938251	0.969777	0.82572	1.12273	1.17653	0.83841	0.701602	0.884825	0.936265	0.964704	1.05038	0.766513	0.893103	0.918633	1.04686	-0.0527675
DPM1_HUMAN	1.21631	1.07559	1.04417	0.994643	0.966876	1.02893	1.08304	1.01272	1.07929	1.09155	1.06419	1.02804	1.16097	1.31362	1.05981	0.982219	1.20273	0.917648	1.18474	1.14436	1.01459	1.18109	-0.294622
DPM3_HUMAN	1.15381	1.07239	1.2107	1.0523	1.06741	1.15912	1.10324	1.09804	1.06302	0.923647	0.934552	0.883703	1.06887	1.34192	1.14078	1.04684	1.00777	0.94347	1.04548	0.807244	1.32636	1.3411	0.171608
DPOD1_HUMAN	0.972404	0.945406	0.65602	0.913721	0.906172	0.841748	0.937477	0.919346	0.667229	0.555411	0.624977	0.683775	0.868618	0.657364	0.933885	0.865356	0.893508	0.857049	0.817307	0.446862	0.971097	1.17567	0.600458
DPP2_HUMAN	0.959005	0.981516	0.938022	0.983549	0.974717	1.03329	0.937636	1.03968	0.898675	1.03672	1.1399	1.26542	1.37564	1.59636	1.07272	0.973638	1.08898	0.990613	1.3192	1.60268	1.11053	1.11678	-0.637581
DPP3_HUMAN	0.803208	0.833497	0.846975	0.752651	0.936599	0.859066	0.975829	0.892225	0.926894	0.682134	0.95877	0.83677	0.638976	0.334671	0.903413	0.873757	0.835273	0.944735	0.679232	0.668971	0.807599	0.866996	0.473532
DPY30_HUMAN	0.957114	0.992603	1.05219	1.00678	1.01096	0.978938	1.15877	1.02699	0.929155	0.945887	1.31464	1.27953	1.164	1.06062	1.02747	0.96767	1.02495	0.927499	1.04649	1.25896	1.0929	1.0145	-0.645331
DPYL2_HUMAN	0.932754	0.914216	0.971143	1.00714	1.01942	0.979025	1.03257	0.920978	1.02352	0.985669	1.00455	1.00599	0.846582	0.721468	0.899099	0.995542	0.805695	0.99157	0.803457	0.854824	0.902443	0.87059	0.179113
DREB_HUMAN	1.21948	1.02998	1.16199	1.0459	1.61999	1.59931	1.40102	1.74507	0.931502	0.869711	0.923169	0.864157	1.09794	0.927674	1.05244	0.968117	1.01433	0.964227	1.15877	1.06777	1.02625	0.969027	0.211239
DRG1_HUMAN	0.85008	0.711932	0.780167	0.696749	0.875709	0.825294	0.951527	0.824591	0.86503	0.963084	0.735714	0.840519	0.659943	0.661008	1.03794	1.04974	0.871119	0.979415	0.687642	0.629782	0.835066	0.845846	0.519332
DSRAD_HUMAN	0.980689	1.02623	0.973834	0.939271	0.998284	1.01864	0.908785	1.05907	0.984241	0.817756	0.814008	0.763011	0.9856	0.681516	1.0381	1.0227	1.01492	0.983294	1.00141	0.771132	1.03011	1.0796	0.805067
DUS23_HUMAN	0.864557	0.759437	0.833327	0.687334	0.95844	0.916444	0.920975	0.912007	0.966037	1.10097	0.880598	1.03678	0.51102	0.561534	0.963809	0.974366	0.805596	0.952602	0.786944	1.07169	0.832183	0.915768	0.0637307
DUS3_HUMAN	0.845026	0.866433	0.874925	0.977017	1.0286	1.0622	1.0467	0.997222	0.893175	0.887979	0.972064	1.04336	0.471115	0.327072	0.897036	0.967393	0.798326	0.995376	0.616633	0.677421	0.85406	0.877231	0.267014
DUT_HUMAN	0.994742	1.04345	0.984038	0.971757	1.02928	0.892314	1.02266	1.00279	1.02395	0.912506	1.18851	1.05535	0.941397	0.869731	0.941928	1.00354	0.941975	1.018	0.898686	1.018	0.925328	1.0598	-0.103228
DX39A_HUMAN	0.962295	0.993438	0.930628	0.92318	1.02386	1.0165	0.973753	1.04379	0.951402	0.941285	0.876485	0.859399	1.05989	0.889307	1.09087	1.05931	1.19176	1.11288	1.22697	1.09916	0.994614	1.09713	0.462984
DX39B_HUMAN	0.946507	0.967763	0.884855	0.925718	1.03609	1.01985	0.945917	1.0304	0.966092	1.07788	1.05405	0.974864	1.00983	0.653946	1.01719	0.953193	1.04707	1.00033	1.17452	1.22756	1.09778	1.07221	0.100595
DYHC1_HUMAN	0.961694	0.93227	0.952133	0.929552	0.96182	0.899183	0.976127	0.874628	0.985064	0.942228	0.966782	0.986417	0.802645	0.948357	0.895114	0.981036	0.858037	0.977707	0.76102	0.566359	0.823309	0.764976	0.0978401
DYL1_HUMAN	0.856716	0.8338	0.894784	0.928695	1.05068	0.761959	0.888316	0.916841	0.787236	0.963474	0.805055	0.866984	0.954173	0.987024	1.05328	1.06079	1.00407	1.04667	0.961013	1.06262	1.15433	0.896299	0.267427
DYN1_HUMAN	1.20308	1.13256	1.28137	1.03911	0.924425	0.794369	1.4134	1.08756	0.830197	0.952277	1.25567	1.2764	0.784473	0.709733	0.840939	0.837091	1.32777	1.23723	0.965458	1.11195	0.941217	0.858752	-0.0163885
DYN2_HUMAN	0.981729	0.932326	0.939116	0.925324	1.00783	0.935795	0.954596	0.950267	1.00731	0.929684	0.999837	1.03425	0.926915	1.04236	0.968264	1.0166	0.897516	0.963312	0.750354	0.693813	0.913823	0.936802	0.00566414
E2AK2_HUMAN	1.01997	0.970702	1.00042	0.887478	0.957869	0.94755	0.939145	0.894689	0.978948	0.84748	0.906931	0.906098	0.9309	1.26712	1.05048	1.07131	0.914056	0.967396	0.925268	1.1369	0.975409	0.954269	-0.106253
E41L2_HUMAN	1.10011	1.09401	1.13	1.09823	1.15998	1.21434	1.07964	1.18375	1.08821	0.964146	1.06161	0.977221	1.08558	0.828248	0.953221	0.976356	1.02007	1.03613	1.14354	0.973523	1.01384	1.10505	0.267353
EBP_HUMAN	1.07011	0.996072	0.789874	0.848001	0.807633	0.821199	0.901965	0.897565	0.827331	0.905938	0.775451	1.03359	1.09461	1.15094	0.862523	1.04431	1.06093	0.801517	0.839038	0.533503	0.907873	1.25458	0.0661393
EBP2_HUMAN	0.964318	1.02216	0.928043	0.951263	1.07061	1.2569	1.00684	1.10007	1.0208	0.931586	0.991717	0.837026	1.34378	1.09245	1.05798	1.09441	1.04073	0.926564	1.20995	1.04056	1.23461	1.505	0.11636
ECH1_HUMAN	1.12432	1.10865	1.10956	1.08388	1.0767	1.21639	1.05887	1.10566	1.41818	1.21324	1.15281	1.30284	1.65043	2.78649	1.05932	1.0006	1.15556	1.02314	1.14461	1.4215	1.13225	1.17222	-0.532976
ECHA_HUMAN	1.1563	1.22326	1.14825	1.17753	1.10625	1.19885	1.08112	1.08844	1.44955	1.27498	1.19395	1.1488	1.32356	1.47608	1.09638	1.00989	1.17099	0.973921	1.06316	1.1042	1.10103	1.19598	-0.357809
ECHB_HUMAN	1.11308	1.21728	1.05997	1.11964	1.13302	1.28646	1.13478	1.14424	1.35228	1.1515	1.0798	1.16745	1.55303	2.3391	1.11132	1.01952	1.17529	1.03278	1.11441	1.20431	1.17152	1.22122	-0.425856
ECHD1_HUMAN	0.99511	0.825079	0.89432	0.934284	1.07253	0.959368	0.99109	0.941119	1.03824	0.911402	1.13191	0.858722	0.901462	0.791441	1.06418	1.08538	0.915428	1.06968	0.891702	1.00414	0.897186	0.946155	0.295394
ECHM_HUMAN	1.07646	1.17769	1.0525	1.09167	1.1103	1.15118	1.12054	1.1496	1.43754	1.41721	1.31886	1.35228	1.53917	2.15941	1.15532	1.02071	1.09549	1.04925	1.10962	1.34987	1.08238	1.21162	-0.610919
ECI1_HUMAN	1.07836	1.10173	1.17889	1.24477	1.16672	1.2996	1.35295	1.17332	1.32533	1.34645	1.40637	1.61437	2.08443	3.14578	1.17234	1.12718	1.27431	1.0514	0.933663	1.38901	1.2867	1.31476	-0.554182
ECM1_HUMAN	0.983178	0.980931	0.945062	1.03497	1.00187	1.04987	0.985741	0.951691	0.984356	1.04476	0.991703	1.22415	1.08808	1.50997	1.01019	1.01371	1.02489	0.881617	1.16172	1.36876	1.16816	1.16113	-0.638773
ECM29_HUMAN	0.926104	0.903461	0.932552	0.868818	0.877588	0.889791	0.852383	0.790217	1.09185	1.05469	0.973678	1.02274	0.622748	0.851682	0.872307	0.946192	0.942099	1.11202	0.937126	0.619695	0.848988	0.803784	0.028544
EDC4_HUMAN	0.954426	0.983513	0.927739	0.96499	0.919365	0.959512	1.03793	0.946254	1.14659	0.962068	1.19805	1.05829	1.05872	0.772284	1.01018	1.0417	0.898847	0.993667	1.01785	0.868475	1.10708	1.07485	0.0470429
EDF1_HUMAN	0.874794	0.945883	0.810349	0.89409	1.08242	0.969001	0.966815	1.06236	0.91087	0.817278	0.946426	0.801922	0.700823	0.454656	0.961149	1.0008	0.911823	0.86034	0.833825	1.04505	1.06817	1.0509	0.460285
EEA1_HUMAN	0.839528	0.97117	0.913491	0.878033	1.05336	1.06241	0.934396	1.04882	0.935994	0.696059	0.777993	0.747915	1.07223	0.900118	1.02857	1.03281	1.15781	0.930906	1.25045	0.975586	1.17566	1.16755	0.423264
EF1A1_HUMAN	0.980177	0.909988	0.988338	0.940831	1.00584	0.935949	0.97718	0.939454	0.944072	0.935313	0.893161	0.864816	0.874282	0.729065	0.947649	1.00567	0.877035	0.990467	0.802429	0.745466	0.979836	0.918424	0.661305
EF1B_HUMAN	0.911881	0.930016	0.931757	0.943382	1.03475	0.937938	1.01707	0.970177	0.994405	0.946879	0.884271	0.980754	0.922473	1.1068	0.954245	0.999783	0.788539	0.979102	0.75327	0.950514	0.938166	0.895597	-0.0633635
EF1D_HUMAN	0.938411	0.931927	0.940576	0.906224	1.0077	0.926323	0.957093	0.970777	0.861322	0.789872	0.906069	0.857458	0.861344	1.32253	0.869226	0.952108	0.816473	0.899095	0.788217	0.896454	0.961776	0.840328	-0.201633
EF1G_HUMAN	0.911366	0.858723	0.904843	0.88137	0.943629	0.843301	0.921942	0.891182	0.793643	0.836929	0.874623	0.904018	0.783388	0.813348	0.944362	1.01692	0.880953	0.964979	0.77414	0.69057	0.978197	0.912285	0.444915
EF2_HUMAN	0.946425	0.889244	0.958785	0.926271	0.966374	0.877691	0.944718	0.895802	0.941005	0.937533	0.875942	0.850042	0.698268	0.467431	0.89913	0.99094	0.818653	0.976327	0.716048	0.663949	0.899062	0.854858	0.57065
EFGM_HUMAN	1.15817	1.13582	0.976519	1.12537	1.17074	1.12245	1.13896	1.11357	1.39323	1.36673	1.24125	1.17835	1.25392	1.44571	1.09881	0.987716	1.28993	1.02315	1.03428	0.836998	1.15434	1.28064	-0.245899
EFHD2_HUMAN	0.975403	0.863001	0.914595	0.81669	0.90158	0.803823	0.898138	0.860974	0.731577	0.66682	0.758896	0.477853	0.649421	0.368806	0.953726	1.04846	0.795876	0.973869	0.661501	0.505355	0.881855	0.762412	0.806004
EFR3A_HUMAN	0.900134	0.796767	1.08891	1.007	1.06475	0.976594	1.11333	1.08433	0.793979	0.791897	1.06265	0.938782	0.872618	0.874635	1.02655	1.01531	1.18499	1.33447	1.0795	0.916589	1.14316	1.03734	0.243078
EFTS_HUMAN	1.20753	1.35377	1.00587	1.08795	1.05609	1.14897	1.05771	1.07587	1.31705	1.29378	1.19337	0.993724	1.16392	1.37053	1.03453	0.988423	1.19521	1.03142	1.08526	1.22387	0.961105	1.10774	-0.239533
EFTU_HUMAN	1.22134	1.24932	1.17177	1.18204	1.10657	1.25749	1.11512	1.18744	1.38975	1.28454	1.14551	1.20075	1.36387	1.40923	1.11219	1.02287	1.21436	1.0107	1.13796	1.19203	1.10419	1.20347	-0.356353
EGLN_HUMAN	1.00846	1.02672	0.965694	0.883689	0.913576	0.851612	0.945658	0.870981	0.758291	0.464815	0.809216	0.750847	0.773965	0.589313	1.07084	1.03631	1.04569	1.00846	0.842619	0.56628	0.892281	1.07821	0.670506
EH1L1_HUMAN	0.984921	0.958219	1.03889	1.18044	0.987073	0.955692	1.05851	1.06794	0.856542	1.20898	1.05056	1.19653	0.989174	0.858634	0.86017	0.990936	0.999564	1.02486	0.925499	0.881939	0.975194	0.793945	-0.196451
EHD1_HUMAN	0.840161	0.843943	0.910962	0.951899	1.04213	1.01059	1.09586	1.05735	0.940354	1.08471	1.16413	1.39944	0.998524	0.7284	0.889904	0.98308	0.858195	0.969304	1.10646	1.15072	0.834743	0.920936	-0.490496
EHD4_HUMAN	0.919557	0.919819	0.974269	0.924836	0.925014	0.943543	0.956907	0.907066	0.984736	0.889944	0.873159	0.845171	0.676374	0.71727	0.881044	0.93449	0.812747	0.908169	0.669499	0.771988	0.847685	0.878323	0.441442
EI2BA_HUMAN	0.955487	0.931154	1.07167	0.803419	0.945369	0.864237	0.940519	0.944964	0.741203	0.690243	0.65959	0.739286	0.730133	0.821173	0.921267	0.992207	0.911834	1.08705	0.772129	0.713416	0.984458	0.936748	0.654987
EI2BB_HUMAN	0.789286	1.07713	1.07712	1.07932	0.854116	0.994629	0.968935	0.877178	1.08211	1.07137	1.00983	1.22387	1.12854	1.35021	0.987598	1.06417	0.905931	0.947149	0.961397	0.563677	1.10499	1.12947	-0.292695
EI2BD_HUMAN	1.04454	1.00349	0.612321	0.940254	0.790991	0.51983	0.809686	0.744462	0.76061	0.723855	0.795214	0.813622	0.781302	1.16386	1.01892	1.26323	0.85092	0.846195	0.512441	0.285857	0.814778	0.740701	0.264095
EI2BE_HUMAN	0.834855	0.884638	0.825543	0.878124	0.901762	0.834804	0.995603	0.938767	0.788183	0.881696	0.951647	0.718342	0.853035	0.888241	1.03786	1.05248	0.750869	0.995088	0.669914	0.547959	0.87814	0.869978	0.416493
EI2BG_HUMAN	0.83595	0.82353	0.980951	0.759734	1.0899	0.920739	1.12122	1.21643	0.937075	0.937815	0.891054	0.970191	1.08815	1.02673	1.20295	1.0817	1.10074	1.26483	1.03469	0.968997	1.02318	0.989397	0.290091
EIF1_HUMAN	0.952057	1.09461	0.992296	1.09079	1.1026	1.04498	1.226	1.11475	1.08855	1.07434	1.11868	1.13054	0.732609	0.394003	0.953536	1.02806	0.853532	1.03056	0.886087	1.11099	0.854746	0.865996	0.170586
EIF2A_HUMAN	0.923824	0.959264	1.00642	0.951618	0.953404	0.946299	0.985655	0.926863	0.919155	0.916405	0.830345	0.897455	0.798896	0.622573	0.89046	0.937376	0.890373	0.980488	0.69791	0.668584	0.954665	0.934629	0.584423
EIF3A_HUMAN	0.880956	0.863699	0.91751	0.851031	0.917656	0.927373	0.935411	0.937368	0.882112	0.827988	0.840467	0.833944	0.819539	0.934881	0.965889	1.01286	0.926172	0.970498	0.981625	0.978848	0.926853	0.983317	0.355617
EIF3B_HUMAN	0.887485	0.921798	0.820429	0.888207	0.953578	0.886698	0.989331	0.934191	0.827685	0.878996	0.892558	1.03284	0.875141	0.995219	0.934262	0.972639	0.886821	0.898229	0.914865	1.0203	0.972633	1.02197	-0.249903
EIF3C_HUMAN	0.872234	0.890289	0.927727	0.868712	0.945038	0.930352	0.944986	0.916304	0.941243	0.8929	0.977953	0.994153	0.871873	0.916423	0.949877	1.0098	0.924066	0.956099	0.97431	1.01236	0.990027	0.938665	-0.171473
EIF3D_HUMAN	0.858202	0.887679	0.830843	0.829637	0.948775	0.932994	0.968085	1.01164	0.95177	0.928956	0.791399	0.90449	0.888187	1.06337	0.943038	0.976598	0.906539	0.956868	0.942541	0.751527	0.87305	0.849035	0.156624
EIF3E_HUMAN	0.88517	0.883733	0.932875	0.873193	0.958118	0.934097	0.971854	0.924518	0.973192	1.0064	0.970868	0.872367	0.823031	0.945727	0.901955	0.975029	0.93979	0.945354	1.06775	0.93426	0.965513	0.905834	-0.0205854
EIF3F_HUMAN	0.945939	0.864059	0.932216	0.930986	0.998711	0.96119	0.994168	0.974616	0.894748	0.843809	0.960417	0.942642	0.9704	1.48956	0.917986	0.957314	0.904345	1.00062	1.01109	1.21187	0.970243	0.980204	-0.462871
EIF3G_HUMAN	0.879379	0.989486	1.04863	0.934431	1.09839	1.17629	1.12783	1.1771	0.965919	0.910433	1.03177	1.02788	0.942226	0.812036	1.0256	1.05686	0.884997	0.948558	1.02805	1.16549	0.899735	0.896077	0.000149909
EIF3H_HUMAN	0.991038	0.890159	1.07753	0.964579	0.969227	1.0125	0.932903	1.02122	0.886024	0.98385	0.798044	0.945383	0.962396	1.08566	0.989778	0.974864	0.984556	1.0438	1.05745	1.15705	0.995208	1.01004	-0.0186619
EIF3I_HUMAN	0.896418	0.8805	1.00056	1.0052	1.00703	0.969926	0.987969	1.02436	0.999796	0.915716	1.03121	1.09648	0.910423	1.00844	0.935609	0.976609	0.914908	0.941894	1.00321	1.21325	0.991153	0.970747	-0.533511
EIF3J_HUMAN	0.800683	0.920085	0.923801	0.884264	1.03883	0.949778	0.938925	0.94263	0.991127	0.908743	1.09735	0.992054	0.931991	0.55124	1.15335	1.15711	0.986727	0.993486	0.985197	1.12275	1.08445	1.04691	0.283383
EIF3K_HUMAN	0.877445	0.779918	0.941971	0.932962	0.946402	0.867951	0.894241	0.884526	0.88308	0.931819	0.817901	0.835953	0.710881	0.88727	0.882018	0.953996	0.880917	0.99001	0.86373	0.908348	1.00826	0.957181	0.293559
EIF3L_HUMAN	0.899414	0.878149	0.899153	0.872769	0.975264	0.988629	0.984847	0.951171	0.842423	0.812687	0.818481	0.787918	0.767711	0.701437	0.88565	0.910946	0.834532	0.963505	0.926507	0.870381	0.948912	0.867946	0.554118
EIF3M_HUMAN	0.943045	0.99668	0.907444	0.976614	0.90243	0.829589	0.975724	0.889896	0.874111	0.901031	0.618688	0.967201	0.835068	0.934174	0.895817	0.963979	1.00036	1.1259	1.04182	0.922959	1.00578	1.09699	0.379678
ELAV1_HUMAN	1.00974	0.998383	0.912485	0.968326	1.02542	1.09337	1.00363	1.08929	1.00652	0.938769	1.02338	1.00189	1.2992	1.08846	1.03579	1.01461	1.01991	0.990869	1.24739	1.21453	1.12185	1.17671	-0.167347
ELMO1_HUMAN	0.878467	1.01816	1.27117	1.012	1.22037	1.1333	1.18188	1.02005	0.978552	1.00177	1.12648	0.882954	0.835421	1.02399	0.989398	0.944456	0.870952	0.80461	0.404272	0.666255	0.940315	0.631225	0.0742134
ELMO2_HUMAN	0.986818	0.978499	0.804191	0.851236	0.974804	0.934962	0.935851	0.85402	0.684203	0.884713	0.978218	0.776156	0.885813	0.864235	0.896719	1.05201	0.956317	0.937722	0.78297	0.732143	0.96649	0.945383	0.375506
ELOB_HUMAN	0.848659	0.730115	0.817601	0.974658	1.01068	1.06016	1.07142	1.09296	1.07425	0.890936	1.01222	1.07134	0.894962	0.800907	1.01365	1.02825	1.08348	1.08244	1.05538	1.14027	1.03953	0.989765	0.0144432
ELOC_HUMAN	0.998589	0.91775	1.00322	1.05362	1.09684	1.04697	1.02217	1.04702	1.02963	1.04547	1.12141	1.08119	0.82587	0.614467	0.932064	1.03155	0.88611	0.961654	0.908114	1.01722	1.0404	1.03759	0.0769858
ELOV1_HUMAN	1.04213	1.14314	1.09758	1.03301	0.975901	1.13939	1.2522	1.22302	1.10358	0.711226	0.807912	0.975422	0.963368	0.800724	1.01804	1.02725	1.1455	0.912999	1.02282	0.834526	0.811716	0.897288	0.477575
EM55_HUMAN	1.06806	1.17703	1.03445	1.04371	1.06471	1.16979	1.15158	1.12564	1.09362	0.920996	1.02396	1.03645	0.892081	0.680835	0.651495	1.00122	0.977309	0.975755	0.976815	0.837565	1.0023	1.0863	0.20198
EMC1_HUMAN	1.13744	1.04593	0.975693	1.00471	0.918854	0.881821	0.9126	0.899305	0.904351	0.781536	0.989144	0.932562	1.06102	1.11989	1.08782	1.0384	1.0859	0.981282	0.966592	0.682923	0.95476	0.972002	0.231086
EMC2_HUMAN	1.21244	1.17817	1.20984	1.18808	1.32348	1.31617	1.21055	1.2257	1.05629	0.939116	1.13015	1.2498	1.31316	1.82342	1.14879	1.10362	0.980517	0.874813	1.13646	1.07417	1.26233	1.18986	-0.434601
EMC7_HUMAN	1.18353	1.05987	1.08186	1.04837	0.882574	0.915165	0.902993	0.926531	0.980087	1.1999	1.14444	1.43119	0.843377	1.82878	1.18368	1.2573	1.03725	0.876628	1.01351	0.937468	0.836193	1.20279	-0.536094
ENOA_HUMAN	0.934201	0.90069	0.98405	0.951044	1.01061	0.928758	1.00145	0.948237	0.942895	0.831031	0.879752	0.794394	0.732569	0.443619	0.888131	0.977087	0.788523	0.967752	0.700632	0.8055	0.880578	0.845015	0.598009
ENOPH_HUMAN	0.984357	1.02939	1.23934	1.31795	1.0059	0.8232	1.09067	0.965206	1.19768	0.891569	0.964138	1.55286	0.819134	0.588076	0.917787	1.02392	0.924457	0.900528	0.698262	0.834949	0.758845	0.729757	-0.01761
ENPL_HUMAN	0.990798	1.04438	0.9881	1.01666	1.02355	1.08534	0.978854	1.06703	0.968341	0.873058	0.9903	1.10794	1.40585	1.9045	1.06265	1.00974	1.074	0.972256	1.2489	1.38495	1.1583	1.17548	-0.466816
ENY2_HUMAN	1.04224	1.0064	0.888358	1.15042	0.865103	1.03145	0.856857	0.995512	0.822273	0.89148	1.02969	0.960588	1.11833	1.08431	0.96814	0.920859	0.98714	0.945949	0.99863	0.830535	1.10687	1.10349	-0.128555
EP15R_HUMAN	1.01807	0.880371	1.0673	1.0944	1.04735	1.04689	1.01444	1.07266	1.061	0.843966	1.04982	0.996211	1.09131	0.821932	1.10184	1.17789	1.00903	0.922805	0.852315	0.953435	0.835848	0.901739	0.309595
EPN1_HUMAN	0.999049	0.983429	1.08007	1.36512	0.965877	0.892029	0.95901	1.07422	0.923877	0.939632	0.9886	1.01925	0.917752	0.585589	1.00082	1.00901	0.994455	0.980473	0.821952	0.817394	1.09165	1.03213	0.384381
EPN4_HUMAN	0.872371	0.929849	0.936683	1.03351	0.921115	0.957376	0.965494	1.04927	0.551833	0.634207	0.581996	0.708243	0.997389	0.609617	1.13416	1.14935	1.06076	1.07008	1.10517	1.23126	1.3866	1.11737	0.504002
EPS15_HUMAN	0.965048	0.98992	1.08036	0.900734	0.876489	0.808567	0.846389	0.857721	1.12313	1.0846	1.15723	0.989103	0.892558	0.934796	1.02537	1.09531	0.87211	0.969787	0.816156	0.928639	0.790032	0.865988	-0.0794872
ERAP1_HUMAN	0.977944	0.99968	0.982885	0.998033	0.924187	0.979749	0.93455	0.965073	0.845815	0.746256	0.961237	0.947957	1.16901	1.27908	1.00811	0.936992	1.07742	0.996778	0.89561	0.608583	1.06312	1.0747	0.0210017
ERF1_HUMAN	0.943345	0.921081	0.86349	0.84375	0.925043	0.845203	0.919721	0.862922	0.907684	0.863469	0.993746	0.931511	0.766723	0.600098	1.02441	0.976041	0.871063	0.943182	0.805852	0.946766	0.850444	0.88765	0.359633
ERF3A_HUMAN	0.993941	0.986066	1.02572	0.992657	0.991271	0.917397	1.05059	0.976002	0.938479	0.974103	0.931825	0.957262	0.824852	0.811374	0.936029	0.994387	0.879274	1.00938	0.794304	0.9294	0.994887	0.987984	0.417139
ERG1_HUMAN	0.890804	0.915163	0.946523	0.911737	0.933206	1.04955	0.874577	0.885848	1.40375	1.43679	1.56702	1.83801	0.838978	0.845007	1.07152	1.01515	0.971676	0.842153	1.47351	1.18836	0.667221	0.907973	-0.604819
ERGI2_HUMAN	1.10948	1.16502	1.12023	0.966468	1.18335	1.21062	0.956535	1.19648	1.22984	0.806151	1.13792	1.18382	0.997253	1.03782	0.821809	0.754137	0.818248	0.901933	0.709077	0.667502	0.936303	1.39092	-0.127231
ERH_HUMAN	0.965231	1.02115	0.99509	1.03485	1.01473	1.17813	0.951372	1.08328	1.07671	0.981942	0.978289	1.01839	1.15462	0.855116	1.05773	1.04023	1.00828	0.942329	1.24578	1.34774	1.29113	1.11131	0.0107011
ERLN1_HUMAN	1.26563	1.22281	1.29904	1.15168	1.09137	1.23918	1.17166	1.13031	0.713933	0.716261	0.763079	0.759863	1.53322	1.89276	1.31193	1.19902	1.14386	0.910709	1.0957	1.00436	0.908135	1.10055	0.0529135
ERLN2_HUMAN	0.925732	0.953049	0.917102	0.945614	0.982692	1.0178	0.88029	0.950274	0.949312	0.917256	0.954437	1.07772	1.3732	1.54721	1.06899	0.995722	1.07027	1.00965	1.10433	1.06505	1.13932	1.15324	-0.365881
ERMP1_HUMAN	1.14942	1.10721	1.08924	1.03929	0.915087	1.08996	1.08301	1.00951	1.25788	1.0186	1.08431	1.09057	1.04221	1.18154	1.01992	0.95741	1.03282	0.864885	0.917428	0.674651	0.843869	0.988612	-0.0960881
ERO1A_HUMAN	1.05399	1.10825	0.979726	1.03539	0.938143	1.01909	0.962036	0.954493	0.885389	0.959399	1.10285	1.17118	1.26735	1.67945	1.01992	1.01688	1.07308	0.994898	1.37182	1.24282	1.09842	1.04178	-0.588714
ERP29_HUMAN	1.0608	1.09217	1.06651	1.13131	1.03449	1.06179	1.00657	1.03375	0.955325	0.907996	1.07619	1.11857	1.46935	1.98134	1.08339	1.01863	1.10126	0.986295	1.27429	1.4709	1.15131	1.15234	-0.490838
ERP44_HUMAN	0.956548	1.0036	0.947615	0.999917	0.958277	0.998128	0.971058	0.999713	0.940915	0.95346	1.08326	1.11237	1.41867	1.79706	1.0786	1.01406	1.073	0.960018	1.14157	1.25171	1.07973	1.08936	-0.514294
ES1_HUMAN	1.24392	1.28263	1.10061	1.2614	1.27305	1.47923	1.2753	1.39118	1.39496	1.26203	1.03318	1.27355	1.50759	2.07977	1.07126	0.96628	1.01103	0.868075	1.06986	1.06059	1.04693	1.20507	-0.402469
EST1_HUMAN	1.01454	1.03912	1.00375	1.04406	1.02255	1.0536	0.962702	0.990976	1.03403	0.988554	1.069	1.27822	1.43664	2.01156	1.01097	0.976068	1.10116	0.988403	1.24377	1.25289	1.13607	1.17959	-0.591224
ESTD_HUMAN	0.932815	0.902709	0.932272	0.93806	0.931227	0.890411	0.947565	0.88533	0.95488	0.939197	0.934178	0.898945	0.800539	0.615848	0.898152	0.991378	0.829161	0.979352	0.736422	0.746485	0.996589	0.966912	0.494713
ESYT1_HUMAN	1.09166	1.13757	1.03194	1.1126	1.07184	1.14497	1.04692	1.00518	1.18923	1.01481	1.1268	1.15042	1.05007	0.975452	1.06668	1.01571	1.06997	0.906405	1.01447	0.724298	0.988951	1.0483	0.011355
ESYT2_HUMAN	1.0974	1.09058	1.07486	1.06132	1.05603	1.13086	1.07033	1.05433	1.13539	1.02668	1.09163	1.13851	1.06193	0.986841	1.01779	1.01478	1.10087	0.941349	1.04224	0.784566	0.894648	0.933729	-0.0316493
ETFA_HUMAN	1.10909	1.16281	1.03011	1.16405	1.12907	1.29222	1.16838	1.1974	1.38104	1.39134	1.25902	1.3578	1.58038	2.20786	1.15103	0.993847	1.18573	0.977882	1.16326	1.38475	1.08638	1.12745	-0.609989
ETFB_HUMAN	1.0836	1.16741	1.07726	1.0707	1.18647	1.30195	1.14455	1.19305	1.34162	1.31846	1.22551	1.30714	1.52405	1.85296	1.08711	0.993278	1.13018	0.92796	1.11188	1.31436	1.16177	1.24863	-0.603176
ETHE1_HUMAN	1.04744	1.10933	1.03962	1.14187	1.08331	1.15226	1.07802	1.09972	1.2585	1.15601	1.13314	1.23653	1.1986	1.37029	0.989175	0.987482	1.0032	0.909456	0.921401	0.998899	1.01537	1.09348	-0.541999
EVI2B_HUMAN	0.878286	1.06829	0.968359	1.39955	1.18391	1.13404	1.11517	1.10396	0.993642	0.751808	0.978352	0.828159	1.01526	0.869484	0.983732	0.982648	0.96706	1.00929	0.984811	0.634886	1.08258	1.27402	0.366478
EVL_HUMAN	1.07497	0.936871	1.13349	1.02299	0.952689	0.994482	0.955909	1.08876	0.995115	1.15702	1.2162	1.32179	0.865697	0.976588	0.891693	0.982689	0.816331	0.953608	0.795812	0.764145	0.889295	1.0341	-0.444096
EWS_HUMAN	0.899126	0.996034	0.938135	1.10564	0.92806	0.946652	0.943249	0.990707	0.909374	0.862627	0.751913	0.828777	0.868437	0.722706	0.819418	0.825231	0.855582	0.938925	1.00619	1.18687	0.875518	1.03004	0.24987
EXOC1_HUMAN	1.24187	1.24899	0.67984	1.07086	1.08606	1.07186	1.01283	1.08217	1.03135	1.26225	1.0609	1.00128	1.03167	0.907933	1.13213	1.06326	0.934622	0.916107	0.730025	0.600533	0.972112	0.907715	0.231637
EXOC3_HUMAN	0.935892	0.91764	0.976129	0.706973	1.02058	1.11523	1.05751	0.840743	1.07295	1.13331	1.23772	1.30425	1.01004	0.900812	0.887697	1.00331	1.26312	1.37295	0.984242	0.880674	1.04702	0.920906	-0.20547
EXOC4_HUMAN	1.02172	1.05378	1.07555	0.983917	1.0136	0.903671	0.960127	0.957	0.863861	0.971431	0.941391	0.86601	0.975646	0.74204	1.10476	1.03682	1.03217	1.06022	1.06652	0.830577	0.912497	0.883969	0.632985
EXOC8_HUMAN	1.13889	1.10463	0.949313	1.03601	1.13719	1.08736	0.974427	0.930094	1.0345	1.08777	1.13382	1.19232	0.855963	0.713552	0.85904	1.00397	1.06617	1.07189	0.843773	0.798517	1.02222	1.12378	0.0697614
EXOS2_HUMAN	0.947539	0.906803	0.863531	0.892687	0.992191	0.941828	0.884621	0.991864	1.0728	0.970161	1.21508	1.00675	1.18374	1.82669	0.945322	0.912072	1.02528	0.979114	1.10157	1.21758	1.11891	1.106	-0.578439
EXOS3_HUMAN	1.11124	0.935833	1.04287	1.1532	0.959076	0.98196	0.968666	0.89814	1.00762	0.876497	1.14212	0.980418	1.22088	1.13958	1.09811	1.05241	1.08776	1.16924	1.09678	0.797333	1.07505	1.19416	0.0497052
EXOS4_HUMAN	0.965569	1.06586	1.01023	1.00422	0.954731	0.9941	0.972836	0.956618	0.996979	0.888806	1.13515	1.10074	1.19802	1.48527	1.01175	0.95992	1.0701	1.03632	1.14176	1.13371	1.23071	1.2793	-0.484721
EXOS5_HUMAN	1.14337	1.1924	0.914067	1.07062	1.08161	1.08222	0.726747	1.06561	0.91631	0.985077	1.1702	1.0277	1.03523	1.10157	0.884017	1.00373	0.859219	1.06246	1.13911	1.21058	1.38248	1.46284	-0.231854
EXOS6_HUMAN	0.884383	0.937785	1.01527	0.982732	0.972182	0.787698	0.813348	1.02024	1.11866	1.01753	1.0123	1.25141	1.28223	1.54013	1.26669	1.19669	0.834854	0.908753	0.931678	1.26101	0.844362	0.85193	-0.411412
EXOS7_HUMAN	1.11745	1.06342	1.17631	1.16922	1.17075	1.14706	1.12613	1.16906	1.23358	1.0988	1.25321	1.17407	1.13431	1.33746	0.956038	0.916579	1.00194	1.12135	1.16941	1.12097	1.17816	1.20142	-0.637105
EXOS9_HUMAN	0.785267	0.77215	0.780936	0.858537	0.792487	0.924618	0.953234	0.969707	0.727525	1.12501	1.32549	1.16868	0.956437	1.01818	0.850242	0.791499	0.922693	0.986934	1.22745	0.919864	1.17897	1.0196	-0.633144
EXOSX_HUMAN	1.22239	1.09914	1.12249	1.06088	0.887947	0.930233	0.859679	0.874532	0.72844	0.603946	0.788885	0.707339	0.987865	0.936747	1.22525	1.11467	1.06694	1.00446	0.755846	0.781335	0.93428	1.15638	0.574082
EZRI_HUMAN	0.95698	0.949552	1.01283	0.981619	1.0181	0.989938	1.0325	1.02442	0.928749	0.918781	0.939344	0.80473	0.850982	0.522705	0.931264	0.969954	0.873378	0.999281	0.786143	0.821186	0.909268	0.982797	0.618976
F10A1_HUMAN	0.908855	0.881084	0.969958	0.929437	1.03912	1.04919	1.03099	1.01927	1.08842	0.942811	0.947209	0.977111	0.836576	0.623103	0.952441	0.979071	0.905809	0.911929	0.876827	0.869222	0.992695	0.887768	0.369842
F1142_HUMAN	0.874778	0.862962	0.955641	0.926502	0.888536	0.78007	0.757984	0.886782	1.04766	0.969072	1.07807	1.05321	0.757461	0.514081	0.905615	0.933236	1.03951	0.971169	0.998688	1.13427	0.988273	0.993891	0.0340115
F136A_HUMAN	0.987875	1.00088	1.06623	0.971558	0.906221	1.00424	1.00493	1.16914	0.834222	0.902535	1.07315	0.983466	1.19556	1.50622	0.867974	0.940795	0.933641	0.823046	0.865168	1.0368	1.12601	0.858479	-0.438025
F16P1_HUMAN	1.06346	0.909909	0.771056	0.788772	1.22427	0.902186	1.01243	1.15483	1.02767	0.844464	0.84731	0.747753	0.795745	0.61921	0.862299	0.959174	0.891629	1.02394	0.767289	0.822294	0.755594	0.766419	0.544304
FA49B_HUMAN	0.93765	0.900076	0.957265	0.93794	0.999509	0.920624	0.999102	0.964661	1.08408	0.953534	0.945851	0.949365	0.574145	0.244133	0.876424	0.934676	0.812495	0.917501	0.652495	0.537657	0.822518	0.754345	0.410146
FA98B_HUMAN	1.03663	1.03965	1.2421	1.01643	0.90496	0.972596	0.934912	0.933021	0.880593	1.01367	1.00839	0.874381	1.15904	1.28169	1.04593	0.911901	1.09316	1.15462	1.15676	1.82018	0.896406	0.976984	-0.226365
FAAA_HUMAN	1.04979	0.850892	1.05968	0.977399	0.96101	0.946363	0.981979	0.84376	1.00607	0.943903	0.971522	0.920784	0.682749	0.345131	0.960106	0.938659	0.863816	0.889891	0.673852	0.641938	0.753386	0.765897	0.408865
FABP4_HUMAN	0.982021	0.898426	1.06557	0.980773	1.06381	0.940656	1.08258	0.996947	1.09906	0.813606	1.03216	1.20303	0.785434	0.576332	1.0046	1.033	0.729745	1.04648	0.974757	0.985349	0.981189	0.843027	0.0908674
FABP5_HUMAN	0.934584	0.88209	1.04744	1.00017	0.965432	0.914744	1.01278	0.984224	0.971756	0.870777	0.77344	0.831954	0.656427	0.412656	0.857276	0.94545	0.709569	0.953583	0.742979	0.818423	0.893235	0.871515	0.536881
FACE1_HUMAN	1.18287	1.23417	1.03232	1.10406	0.981429	1.11646	1.12369	1.06897	1.04473	1.04754	0.990399	1.00457	1.22194	1.22199	1.09559	1.02516	1.34533	1.07709	1.24036	0.934248	0.998397	1.12886	0.157832
FACR2_HUMAN	1.10858	1.16544	0.981552	0.872172	0.978739	1.0232	0.930688	0.971399	1.01883	0.807836	0.951072	0.753572	1.04127	0.827926	1.02158	1.07253	0.968477	0.935473	0.901153	0.521973	1.03192	1.02642	0.602412
FAD1_HUMAN	1.21842	1.17209	1.26161	0.82115	1.15805	0.985158	1.21352	1.05378	1.23273	1.27302	1.34232	1.27264	0.800635	0.898139	0.982302	1.08968	1.11454	0.919	0.905833	0.811667	0.974948	0.747375	-0.0936257
FAF1_HUMAN	0.84866	0.859676	0.781352	0.781947	0.985498	1.05919	0.94655	1.03544	1.00495	0.746297	0.817935	0.990275	0.77756	0.581331	0.926142	0.907127	0.918919	1.00131	0.762523	0.916038	0.940299	0.960859	0.366246
FAF2_HUMAN	1.13709	1.24744	1.10298	1.15029	1.11403	1.14843	1.0773	1.07783	1.28536	1.06178	0.873666	0.942646	1.05122	0.963455	1.05567	0.979414	1.00205	0.894815	1.05207	0.752552	1.04407	1.05455	0.437281
FAHD1_HUMAN	1.26994	1.22575	1.20534	1.27606	0.915855	1.0149	0.985151	0.97505	1.34134	1.33092	1.33132	1.54531	1.34132	2.03087	0.990737	0.911282	1.08054	0.889389	1.18327	1.24446	0.857813	0.921756	-0.702027
FAK2_HUMAN	0.878022	0.779281	0.782256	0.921366	1.00032	0.96703	0.88219	0.879263	1.01053	0.976081	0.924426	0.969705	0.736813	0.696978	0.924073	0.943801	0.907993	1.01624	0.708885	0.711432	0.909134	0.872606	0.25849
FAM3C_HUMAN	1.08833	1.03251	1.01288	0.857625	1.01467	1.11232	1.12637	1.0893	1.22957	1.02285	1.05601	1.10642	1.01401	1.4648	0.930455	0.884319	0.960026	0.970552	1.17182	1.03178	1.08867	1.11254	-0.510502
FAS_HUMAN	0.924743	0.867713	0.920408	0.87407	0.953188	0.889246	0.980022	0.908622	0.915122	0.983453	0.963693	0.9963	0.775219	0.945425	0.927592	0.992981	0.845281	1.00078	0.743891	0.72513	0.906667	0.848905	0.0245089
FBRL_HUMAN	1.038	0.95618	0.978248	0.971635	1.10651	1.12132	1.0555	1.13228	1.08011	1.04798	1.07289	0.974726	1.18114	1.02048	1.06969	0.997502	1.06411	1.01868	0.989278	0.644991	1.1136	1.19176	0.210385
FCERG_HUMAN	1.08054	1.04339	1.08484	1.16678	0.988889	1.14179	0.959499	1.08545	1.15572	1.02587	0.983784	0.972979	1.18341	1.11684	1.01184	1.02907	0.982005	0.949004	1.05583	0.796028	1.13282	1.08439	0.10804
FCGRN_HUMAN	1.01488	1.18366	0.93066	1.04891	0.987451	0.938931	1.13077	1.03073	0.796207	0.879946	0.982811	1.01341	1.05634	0.993116	1.15477	1.08678	1.107	1.04744	0.958287	0.758662	0.876909	1.01394	0.344028
FCHO2_HUMAN	0.907132	0.977417	1.01064	0.918513	0.975649	0.973351	0.93457	0.898016	1.13306	0.939344	1.14425	1.14723	0.99847	0.785763	0.955307	1.0854	0.851378	0.85254	0.791172	0.85052	0.815251	0.870374	-0.119016
FCL_HUMAN	1.14755	1.01752	1.15153	1.10505	1.30971	1.09156	0.954501	1.23891	0.825616	0.894125	0.760423	0.671161	0.543456	0.51473	0.843438	0.937548	1.07172	1.13386	0.797926	1.10574	0.950907	1.04189	0.512378
FDFT_HUMAN	0.988323	1.12654	0.815297	0.837561	0.844971	0.90862	0.78105	0.881899	1.07688	0.942824	1.0708	1.0369	0.855769	0.995173	1.00391	0.919054	0.96923	0.863852	0.973933	0.739252	0.893927	0.889154	-0.161216
FEN1_HUMAN	1.04002	1.10266	1.03203	0.987071	1.03293	1.06062	1.01669	1.02207	1.07711	0.81868	0.925278	0.770721	0.698823	0.487897	0.982708	0.981229	0.925819	1.07532	0.731188	0.687753	0.839136	0.93566	0.648064
FERM2_HUMAN	0.936029	0.959817	1.09031	1.05817	0.797693	0.769343	0.884647	0.803581	1.22628	1.33854	1.23821	1.12229	0.634745	0.374859	0.875529	0.990386	0.764666	0.924664	0.68178	0.605205	0.721725	0.832589	0.0486285
FGD3_HUMAN	1.0767	0.99921	1.1006	1.10121	1.10421	0.905846	0.957107	0.95724	0.963537	1.01491	0.905548	0.949611	0.888136	0.649972	0.803293	1.0351	1.02045	0.977813	0.836219	0.816616	0.947129	1.08897	0.476061
FHOD1_HUMAN	0.949876	0.732963	0.977651	0.908478	1.09315	1.08039	1.03287	0.999785	1.23172	0.849296	0.759993	0.861571	0.678016	0.864234	0.741997	1.0111	0.764191	0.834637	0.496042	0.721833	0.88138	0.963003	0.25473
FIP1_HUMAN	1.06402	1.21862	0.995833	1.04403	0.985813	1.12814	0.954192	1.07492	1.12537	1.38169	1.2843	1.22889	1.51211	1.50031	1.06536	1.05204	1.09704	0.982877	1.33042	1.46336	1.27983	1.19501	-0.599014
FIS1_HUMAN	0.991175	1.03911	0.931673	1.01836	0.95043	1.0128	0.956066	1.02916	1.09803	0.982659	1.22223	1.45057	0.95028	0.749794	0.905306	0.898675	1.02486	0.969208	1.14806	1.32	1.02364	1.06727	-0.488141
FKB15_HUMAN	0.895227	0.944299	0.843079	0.939177	0.978394	0.898508	1.00903	0.99057	0.839871	1.001	1.19557	1.23583	0.812179	0.961884	0.921368	0.987777	0.864482	0.958246	0.813458	0.998477	0.798784	0.911944	-0.561446
FKB1A_HUMAN	0.999754	0.927968	1.01751	0.947453	0.918275	0.874041	1.02286	0.949042	0.902253	0.841513	0.897703	0.858869	0.710001	0.444057	0.876581	0.960113	0.813753	1.00073	0.754252	0.815801	0.904017	0.805473	0.540046
FKBP2_HUMAN	0.898183	1.01161	0.960957	0.997128	0.932643	0.972846	0.951718	0.982607	0.920021	0.936737	1.10118	1.26406	1.4906	1.96149	1.17271	1.11115	1.03195	1.00167	1.20351	1.49233	1.11664	1.17113	-0.54576
FKBP4_HUMAN	0.999004	0.892973	1.10025	0.977036	1.1176	1.18692	1.1133	1.03198	1.06604	1.17702	0.980516	1.02123	0.750602	0.541166	0.914849	1.0187	0.868039	0.954339	0.98872	1.1299	0.917882	0.800521	0.121554
FKBP5_HUMAN	0.804357	0.915424	0.894238	0.871992	1.07327	1.12026	0.933689	1.07996	0.87557	0.877154	0.777878	0.641168	0.858331	0.839932	0.957687	0.912768	0.840439	0.930361	0.892687	1.05329	0.754934	0.878828	0.370007
FKBP8_HUMAN	0.88216	0.946163	0.895644	0.878315	0.979213	1.14746	0.939868	1.04003	1.12595	0.840286	0.886306	0.844621	1.0593	0.81432	1.01798	0.948908	1.03714	0.887327	0.929381	0.690991	1.03522	1.13603	0.463369
FKBP9_HUMAN	1.05271	0.821104	0.9357	1.01887	1.10114	1.18922	0.872847	1.15358	0.761839	0.861889	1.29026	1.47089	1.30209	1.33357	1.03775	1.24089	0.897609	0.904452	1.12607	1.17843	0.743266	0.902393	-0.651114
FL2D_HUMAN	1.11425	0.996502	1.26178	1.17317	1.05555	1.11458	1.11267	1.14594	0.81596	0.612002	0.690677	0.582502	1.5042	1.68395	1.04113	1.03113	1.09392	1.07675	1.43962	1.43891	1.20608	1.25566	0.0553804
FLII_HUMAN	0.941397	0.906036	0.904932	0.858631	0.872126	0.846269	0.893785	0.857189	1.02578	0.770535	1.00393	1.06809	0.900493	0.989491	0.919313	0.996058	0.868563	0.928861	0.742605	0.810344	0.901596	0.850317	-0.145906
FLNB_HUMAN	0.917654	0.872545	0.806632	1.00585	0.984662	0.943495	0.971315	0.967454	0.790041	0.743743	0.87774	0.898651	0.854909	0.71422	0.918565	0.977015	0.9286	0.964496	0.877726	0.811567	0.929253	0.94377	0.474795
FLOT1_HUMAN	1.04805	1.22966	1.21273	0.874055	1.28222	1.2292	1.09783	1.07176	1.11983	0.99861	0.944182	1.28589	1.48416	1.62196	1.18907	1.17433	1.19407	1.11885	1.56558	1.29527	1.0238	1.08855	-0.313961
FLOT2_HUMAN	1.12449	1.3438	1.01211	1.1101	1.15248	1.20307	1.05744	1.09281	1.01144	0.866383	0.983904	1.06519	1.20135	1.01442	1.00875	0.947042	0.972367	0.885479	1.07266	0.828315	1.05358	1.01558	0.116802
FMNL1_HUMAN	1.07173	1.0481	1.08614	1.05249	1.03588	1.01818	1.02498	0.928062	1.01643	1.06056	0.970485	1.07599	0.863467	0.775017	0.955028	0.958717	0.98659	1.02729	0.937229	0.741658	0.946777	0.913964	0.26405
FMNL2_HUMAN	0.970384	0.980721	1.16404	1.03261	1.2108	1.21634	1.08553	1.0376	1.3626	1.11324	1.43469	1.30547	0.969268	0.791674	1.01027	1.11756	0.935205	0.941878	1.07235	0.946096	0.855491	0.949317	-0.288104
FNTA_HUMAN	0.882679	0.890966	1.04028	0.859475	0.950379	0.874121	0.98102	0.818989	1.16137	0.712951	0.890426	1.08462	0.869216	1.05466	0.994602	1.01594	0.743758	1.08197	0.649026	0.826486	0.854897	0.935649	0.0307048
FPPS_HUMAN	0.906351	0.882573	0.947807	0.966628	0.899919	0.892715	0.996769	0.902465	0.949248	0.875119	0.947206	0.848427	0.66691	0.468222	0.893069	0.92281	0.834102	0.97147	0.692087	0.683769	0.922717	0.829957	0.494062
FSCN1_HUMAN	0.887694	0.857531	0.911407	0.903227	1.00548	0.932522	1.04121	0.950202	0.984032	0.939851	0.962355	1.01185	0.700962	0.473532	0.903327	1.00973	0.811953	0.979186	0.700574	0.813091	0.904338	0.869275	0.326581
FTO_HUMAN	0.941373	0.830073	0.94577	0.746786	0.846419	0.875067	0.876891	1.06566	1.23527	1.0906	1.30882	1.12947	0.74125	0.844396	0.927676	0.937559	0.945967	1.2003	1.13722	0.834245	0.936889	0.876703	-0.250221
FUBP1_HUMAN	0.873067	0.88985	0.936285	0.962409	0.969131	0.97451	0.917462	0.971742	0.812923	0.756147	0.837837	0.745206	0.824659	0.587403	0.951489	0.928723	0.99784	0.952492	1.17655	1.38719	0.995441	1.08984	0.266365
FUBP2_HUMAN	0.87808	0.910207	0.910419	0.96096	0.947584	0.979606	0.923277	1.01146	0.932768	0.879559	0.966104	0.915632	1.06617	0.94609	0.971889	0.936763	0.981546	0.94069	1.16944	1.19427	1.06253	1.11452	-0.104114
FUBP3_HUMAN	0.894827	0.97915	0.918524	0.924771	1.00066	1.04235	0.980714	0.975618	0.995076	0.930887	1.1076	0.876258	1.23208	1.15944	0.994958	0.966897	1.00375	0.962311	1.13415	1.3405	1.11481	1.20658	-0.257095
FUMH_HUMAN	1.15281	1.2092	1.09132	1.13371	1.11959	1.12423	1.13947	1.16939	1.38179	1.37124	1.14582	1.53366	1.56201	2.57129	1.11584	1.03267	1.198	1.02262	1.18633	1.37754	1.06659	1.19652	-0.592914
FUS_HUMAN	1.04048	1.05713	1.0619	1.08606	1.03041	1.11534	0.954493	1.0947	1.05667	0.915717	0.859102	0.813071	1.23425	0.752598	1.08905	1.04409	1.00012	1.02704	1.26	1.35793	1.14517	1.16533	0.385569
FXR1_HUMAN	1.00541	1.13508	0.920028	1.27077	1.06996	1.06478	0.949634	0.955716	1.10293	1.34388	1.2376	1.30273	0.954036	1.07633	1.02378	0.960327	1.0895	1.01353	1.14824	1.38072	1.26833	0.992853	-0.541541
G3BP1_HUMAN	0.979682	1.03763	0.938391	0.980618	0.988452	1.02253	0.965189	1.01477	1.0087	1.0452	1.00871	1.24093	0.814246	0.59503	0.981715	1.01818	0.96269	0.992427	1.14479	1.26512	1.04209	1.05983	-0.0715056
G3BP2_HUMAN	1.00025	1.01274	1.03719	1.07012	1.0633	1.03359	1.01325	1.06695	1.06268	1.02806	1.03284	1.22979	0.967143	1.05744	1.06118	1.10096	0.979818	1.0665	1.14527	1.3855	1.06538	1.06756	-0.43024
G3P_HUMAN	0.975003	0.893189	0.940909	0.932731	0.956652	0.928064	1.01105	0.921777	0.906401	0.833212	0.728413	0.650626	0.767004	0.613561	0.859106	0.967561	0.860469	1.04494	0.76983	0.843017	0.952456	0.894663	0.815846
G6PD_HUMAN	0.874246	0.865425	0.844418	0.905045	0.992651	0.915617	0.98925	0.936149	0.978951	0.916451	0.978509	0.971869	0.788316	0.628327	0.920861	0.995524	0.826111	0.987177	0.880206	0.906419	0.944285	0.920404	0.273752
G6PE_HUMAN	0.986014	0.975747	0.874163	1.00195	1.07136	0.979978	1.09734	1.0071	0.809617	0.647985	1.00881	1.11081	1.28599	1.53097	1.00627	0.974417	0.977968	0.916467	1.00483	0.777637	0.996482	1.12983	-0.289366
G6PI_HUMAN	0.954594	0.90981	1.00821	0.934371	0.955382	0.871936	0.945473	0.888351	0.89936	0.805554	0.807159	0.625679	0.666759	0.35662	0.888101	0.98435	0.822831	0.992007	0.735839	0.573667	0.825645	0.807224	0.737463
GAK_HUMAN	1.07304	0.810828	0.929576	0.78411	1.06921	0.888168	1.18475	0.926599	1.00314	1.13157	1.20929	1.11462	0.981998	1.17783	1.0475	1.09513	0.810429	0.924168	0.699352	0.775127	0.948618	0.825214	-0.254163
GALK1_HUMAN	0.780525	0.678533	0.607267	0.719103	0.855964	0.796525	0.917848	0.820416	0.784622	1.09939	0.956082	0.87194	0.747849	0.626717	0.973785	0.829286	0.96417	1.26145	0.860003	1.32336	1.17307	0.830515	0.0448688
GALM_HUMAN	1.05243	1.03871	0.991819	1.02085	0.890011	0.927825	0.932875	0.850602	0.958503	0.757676	1.03261	1.04953	0.689947	0.568987	0.932613	1.11826	0.828334	0.897117	0.695023	0.714615	0.72303	0.66107	0.236681
GALT2_HUMAN	1.08465	1.07519	0.914783	1.08251	1.04709	1.04664	1.06781	0.996916	1.12152	0.966037	0.763092	0.918486	1.16101	1.25371	1.02186	0.998403	1.06998	1.04807	1.09253	0.991278	1.01274	1.21279	0.232972
GANAB_HUMAN	1.01198	1.0553	0.995429	1.05028	0.983574	1.00635	0.939813	1.0223	0.867142	0.872282	1.02081	1.17302	1.40628	1.80086	1.09307	1.00628	1.06953	0.978585	1.14556	1.02661	1.09648	1.15785	-0.449406
GAPD1_HUMAN	0.848458	0.832622	0.616352	0.657017	1.0008	0.871285	0.883116	1.02278	0.966431	0.938341	1.05909	1.15649	0.914897	1.08711	1.15099	1.02467	0.729559	0.975652	0.654335	0.812761	1.0305	0.970501	-0.206743
GAPR1_HUMAN	1.01385	1.01461	1.12707	1.04844	1.10094	1.22857	1.05771	1.0962	1.10082	0.732601	1.07458	0.983054	1.02981	0.78578	0.989229	0.975542	1.00436	0.986055	1.20641	0.910946	1.07969	1.01777	0.205046
GAR1_HUMAN	0.879409	0.642231	0.787546	0.673113	0.636314	0.767658	0.894535	0.9524	1.06216	0.899029	0.874661	0.808526	1.04732	0.910871	0.977226	0.98317	1.13592	1.04975	0.99958	0.916253	0.958274	1.06821	0.20996
GARS_HUMAN	0.995642	0.9148	0.925412	0.96961	0.939027	0.950504	1.00214	0.875871	1.05398	1.12332	1.10225	1.07084	0.909992	0.991496	0.918734	1.00569	0.878763	0.982151	0.774342	0.756389	0.93575	0.918164	-0.210256
GATM_HUMAN	1.20561	1.18472	1.03334	1.15544	1.08361	1.11677	0.9761	1.10684	1.35406	1.23696	1.20867	1.27731	1.39642	1.9109	1.08511	1.08834	1.16309	0.957504	1.00094	0.989131	1.16954	1.29618	-0.464083
GBB1_HUMAN	0.994477	1.03768	1.02846	1.08918	1.12448	1.21196	1.061	1.0912	1.19837	1.06447	1.0603	1.14942	1.15505	1.08535	0.98133	0.94873	1.01698	0.972492	1.17508	1.18489	1.03071	1.05505	-0.48598
GBB2_HUMAN	0.987743	1.05848	0.934238	1.04258	1.13173	1.17049	1.05361	1.09354	1.13559	1.01185	1.06972	1.07406	1.12087	1.00852	1.01365	0.923629	1.02354	0.982471	1.10928	1.12587	1.03134	1.0811	-0.272261
GBB4_HUMAN	0.963143	1.01401	1.22795	1.08775	1.03726	1.10939	0.976084	1.02543	1.17358	1.04119	1.02136	1.13599	1.14725	1.10627	1.07792	1.0138	1.04713	0.997842	1.05149	1.14157	1.09213	1.01477	-0.307704
GBF1_HUMAN	0.957557	0.830906	0.679883	0.960116	0.981474	0.888828	1.13786	0.898652	0.753544	0.862611	0.873623	0.972453	0.794704	1.00579	0.906281	0.857614	0.975545	0.908566	0.682011	0.732755	0.858257	0.684782	0.0196952
GBG5_HUMAN	1.01189	0.993222	1.22151	1.10613	0.998009	1.32653	1.0673	1.36108	1.19355	1.12715	1.90696	1.33541	0.874893	0.757947	1.08493	1.0714	0.846763	0.738986	0.881453	0.692451	1.31867	1.34579	-0.290071
GCDH_HUMAN	1.07496	1.12497	0.897366	0.999407	1.0157	1.1087	1.12183	1.06112	1.57413	1.45175	1.34415	1.34701	1.62561	1.91208	1.18173	1.06219	1.20995	0.999212	1.41474	1.56539	1.21253	1.22282	-0.565657
GCN1_HUMAN	0.968611	0.912351	0.946873	0.883531	1.03251	0.896965	1.0432	0.933921	0.986806	1.01471	1.07911	1.04352	0.800893	0.965019	0.895261	0.983634	0.860746	1.03764	0.738451	0.59981	0.879993	0.722192	-0.0328837
GCP2_HUMAN	0.914318	0.888982	1.00057	0.836478	0.782455	0.864588	0.898279	0.804885	1.09252	0.869221	1.08301	1.02992	0.731182	1.04068	0.838815	1.03143	0.921028	1.00716	0.796687	0.903494	0.892483	0.819839	-0.26859
GCP60_HUMAN	0.89715	0.839575	0.875508	1.0039	0.934394	0.995145	0.910159	1.01555	1.06879	1.07944	1.18597	1.04803	0.771196	0.629916	0.957009	1.02961	0.894262	0.907074	0.768307	0.875669	1.19268	1.15878	0.0347642
GCR_HUMAN	1.13385	0.900325	1.08446	0.865269	0.831665	0.894281	0.938069	0.931664	1.03694	0.930671	0.6118	0.761593	0.794678	0.849863	1.01637	1.09393	0.895062	0.775573	0.639636	0.517275	0.796042	0.811199	0.582998
GDIA_HUMAN	0.848858	0.736855	0.886824	0.83101	0.998868	0.948617	0.948171	0.857701	0.931165	0.712532	0.726985	0.690545	0.653122	0.451001	0.869477	0.906031	0.741801	0.908421	0.757929	0.693059	0.799888	0.835501	0.642519
GDIB_HUMAN	0.964675	0.898429	0.972558	0.9216	0.983182	0.84117	0.966621	0.898368	0.829084	0.848941	0.825543	0.719116	0.686761	0.395281	0.857185	0.964428	0.825711	1.02344	0.713446	0.746681	0.87998	0.849824	0.682572
GDIR1_HUMAN	0.851795	0.802031	0.979472	0.853379	1.01144	0.972861	1.00757	1.00431	0.864323	0.852068	0.918769	0.869691	0.702828	0.454807	0.88073	0.996599	0.807309	0.985586	0.723325	0.755029	0.896861	0.842679	0.446404
GDIR2_HUMAN	0.93652	0.886996	0.946551	0.911334	1.03946	0.970227	1.0287	0.952486	0.876923	0.90535	0.757864	0.899287	0.769879	0.482696	0.875208	0.942935	0.828537	1.00424	0.692936	0.825296	0.86308	0.873822	0.560409
GDS1_HUMAN	0.984176	0.892739	0.957136	0.966891	1.00654	0.893497	0.974274	0.934345	1.03695	1.12386	1.14087	1.08652	0.754477	0.646594	0.971688	0.973658	0.794207	1.03978	0.685504	0.657857	0.847582	0.797135	0.0789968
GELS_HUMAN	0.888313	0.884252	0.934783	0.946692	0.948089	0.923387	1.00652	0.942585	0.922804	0.874742	0.895181	0.933397	0.794936	0.662003	0.906761	1.01586	0.809319	0.994085	0.768093	0.894937	0.906929	0.846007	0.42688
GFPT1_HUMAN	0.983608	0.855748	0.874059	0.881257	1.02967	0.892768	0.909451	0.887925	0.951251	0.831981	0.802607	0.876192	0.726436	0.956588	0.875573	0.969033	0.864432	1.0068	0.834294	0.870293	0.929095	0.916571	0.317282
GGACT_HUMAN	1.10493	1.09156	1.14459	1.03464	1.01438	0.906738	1.28305	0.936991	1.17596	1.0316	1.12752	1.34594	0.720759	0.420303	0.96449	1.03807	0.926223	1.05826	0.7347	0.860271	0.827102	0.87478	0.15334
GGH_HUMAN	1.05441	1.04919	0.945506	1.10864	0.831927	0.86553	0.872082	0.920408	0.751072	0.957843	0.93729	1.04829	1.65722	1.94187	1.26365	1.21719	1.59418	1.31867	1.66198	1.78114	1.15807	1.18336	-0.224616
GGT1_HUMAN	1.03512	1.00768	1.00455	1.04653	1.0027	1.10581	1.06361	0.927543	1.08515	0.835295	1.19567	1.10145	1.09984	1.00038	1.06309	1.03682	1.02457	0.961712	1.06061	0.844559	1.06592	1.12117	-0.134408
GHC1_HUMAN	1.12875	1.17191	1.25314	1.2895	1.08829	1.02763	1.10223	1.10873	1.23678	1.33083	1.06123	0.96509	1.19042	1.10172	1.07954	0.938915	1.20691	0.991851	0.935599	0.863142	1.10344	1.1387	0.224278
GID8_HUMAN	1.0407	1.13023	0.974654	1.01291	1.03075	1.12168	0.920103	1.03022	0.893992	1.07013	1.01393	1.18452	1.12858	1.77716	1.00137	0.984785	1.09229	0.996014	1.13957	1.34856	1.02339	1.04937	-0.60936
GILT_HUMAN	1.11233	1.01211	1.03142	1.10621	1.17259	1.24882	1.16277	1.18472	0.994335	0.991362	0.714722	0.923633	1.11372	1.22166	0.991589	1.02309	1.07459	0.984408	1.25824	1.26508	1.13991	1.10344	0.0969897
GIT1_HUMAN	1.06116	0.848143	1.02976	1.01749	0.882775	0.932704	0.987299	0.882225	1.08146	0.777761	1.2388	0.953945	1.22367	1.42362	1.34302	1.28647	1.20131	1.1542	0.94467	1.14953	1.16518	1.00566	-0.0533494
GIT2_HUMAN	0.962959	1.03987	0.884071	1.11621	0.967432	0.94183	1.0485	0.892555	0.880652	0.910783	1.12563	0.934403	0.965505	0.879965	1.05158	0.939276	1.29524	1.31435	1.12475	1.54587	1.29345	0.946539	0.0476712
GLCM_HUMAN	0.93367	0.86343	0.633149	0.721105	0.859678	0.885444	0.930455	0.991944	0.852855	0.74324	0.801449	0.945222	1.1381	1.38888	1.01577	0.99218	1.05916	1.03288	1.15817	1.28477	1.01015	1.10076	-0.185878
GLGB_HUMAN	1.06675	0.962663	0.872804	1.02417	1.0343	0.960375	1.0715	0.984381	1.05589	0.930262	0.760529	1.04276	0.63564	0.320227	0.936638	0.993956	0.907671	0.97847	0.862172	1.02376	0.935631	0.784967	0.441419
GLMN_HUMAN	1.10245	1.00514	1.02592	1.08135	0.840194	0.945828	1.0197	0.883473	0.891035	1.24012	1.17329	1.20817	1.00308	0.660631	1.29855	1.04694	1.71582	1.50919	1.36708	1.61842	1.06129	0.852044	0.0527581
GLO2_HUMAN	0.909008	0.870834	1.05024	0.697595	1.0812	1.01294	1.0369	0.940491	0.995694	0.923157	1.27273	1.17487	0.917734	1.13579	0.901742	1.11458	0.854496	0.999927	0.643407	0.844368	0.910245	0.961821	-0.368666
GLOD4_HUMAN	0.960965	0.894728	0.966603	0.914757	0.907623	0.868709	1.0052	0.838995	0.987506	0.827381	0.880168	0.809112	0.735147	0.518205	0.903341	1.08451	0.796044	0.990936	0.709345	0.744558	0.822926	0.8588	0.6216
GLRX3_HUMAN	1.02331	0.961239	1.07055	0.946145	1.07878	1.0351	1.09592	0.994773	1.13205	1.1433	1.25302	1.14066	0.791624	0.635299	0.923855	0.970664	0.866377	1.01374	0.867704	1.18888	0.867477	0.899835	-0.142841
GLRX5_HUMAN	0.877694	1.0434	0.752913	0.767458	1.11082	1.15585	1.14468	1.05698	1.24318	1.13037	1.25517	1.39992	1.02791	1.33948	0.945198	0.824974	0.820745	0.82436	0.841682	0.887182	0.833906	1.05717	-0.609711
GLSK_HUMAN	1.18768	1.19179	1.13366	1.19695	1.11387	1.23242	1.22256	1.118	1.36042	1.47809	1.16383	1.33215	1.42788	1.52219	1.11709	0.971878	1.25332	1.03517	1.11673	0.844737	1.18946	1.30598	-0.337102
GLU2B_HUMAN	1.02172	1.03185	1.03287	1.09967	1.09522	1.21319	1.0145	1.15794	0.914514	0.801149	0.88867	1.01474	1.53616	2.07025	1.10469	1.03559	1.03611	0.968231	1.23894	1.29708	1.16677	1.15865	-0.344771
GLYM_HUMAN	1.10476	1.14788	1.03299	1.06798	1.12696	1.20117	1.103	1.16031	1.32842	1.33031	1.26957	1.41382	1.59373	2.06685	1.1423	1.03228	1.19098	0.983955	1.12619	1.16836	1.13891	1.23245	-0.602754
GLYR1_HUMAN	1.2631	1.27468	1.11746	1.3302	1.06496	1.2263	0.978791	0.999337	1.05749	1.24639	1.01769	0.875643	1.19533	0.955213	1.10165	1.03234	1.22038	1.03784	1.1552	0.994151	1.03267	1.11918	0.355602
GMFG_HUMAN	0.860005	0.822656	0.836846	0.88424	1.04291	0.956579	0.928846	1.00984	1.11192	0.986336	0.876702	1.01419	0.717857	0.542142	0.889224	0.986328	0.796688	0.934894	0.674235	0.799	0.909125	0.834989	0.296183
GMIP_HUMAN	0.978521	0.869328	0.991932	0.928539	0.939266	0.873321	0.935184	0.938527	0.565969	0.980783	0.586286	0.99783	1.01274	1.11418	0.989111	1.10662	0.96475	0.88685	0.746883	0.757909	1.20475	1.07052	0.189165
GMPPB_HUMAN	1.08248	0.91548	0.724301	0.969775	0.901612	0.86511	1.03559	0.847635	0.924286	1.12253	0.953561	0.984788	0.895876	1.01862	1.17893	1.10906	0.890521	1.00853	0.834192	1.04126	0.907294	0.86593	0.055184
GNA13_HUMAN	1.10235	0.98485	1.14058	0.988311	1.14867	1.19915	1.06509	1.03571	1.11095	0.98106	1.12085	0.964508	1.23719	0.898722	1.00047	1.04154	0.95387	0.934106	0.941085	0.726346	0.940895	0.99872	0.189167
GNAI2_HUMAN	1.038	1.0874	1.02957	1.0701	1.08458	1.06033	1.01338	1.00041	1.01375	0.886476	0.973869	0.925491	1.01636	0.880075	0.965285	0.924475	0.993008	0.970915	1.00677	0.770924	1.02665	1.02757	0.44346
GNAI3_HUMAN	1.07758	1.14875	1.10627	1.06701	1.21884	1.16261	1.1409	1.06757	1.1707	1.05446	1.00777	0.98347	1.02898	0.998981	0.996548	0.962378	0.960142	1.00148	1.04603	0.837943	0.99114	0.911647	0.216698
GNAQ_HUMAN	1.19643	1.22589	1.21763	1.12957	1.42701	1.36272	1.35037	1.32624	1.21123	1.14493	1.17495	1.16722	1.08632	0.737976	1.04166	0.957454	1.12656	0.960501	1.05851	0.863207	0.999144	0.962315	0.177249
GNAS2_HUMAN	0.955697	1.03581	1.00818	1.01074	1.11055	1.24935	1.01021	1.07114	1.11245	1.14701	1.1074	1.13946	1.00328	0.808916	0.964901	0.940571	0.943032	1.01489	1.06525	0.820493	1.07709	1.11113	-0.0915407
GNL3_HUMAN	1.12839	1.07754	1.13652	1.09717	1.08472	1.11965	0.913931	0.963875	0.970294	0.510936	0.906353	0.658217	1.07756	0.773583	1.13184	1.03721	0.957719	0.836093	1.091	0.869257	1.0861	1.20402	0.524791
GNPAT_HUMAN	1.11025	1.0503	0.976471	1.12999	1.05472	1.13032	0.989304	1.07867	0.950381	0.759185	0.830413	0.582179	1.0707	0.762424	1.26467	1.07636	1.32155	1.18047	1.41792	0.850663	1.18399	1.00044	0.654555
GNPI1_HUMAN	0.833758	0.830033	0.988747	0.911528	0.844176	0.770948	0.995446	0.844052	0.807105	0.802743	0.892726	0.818019	0.499139	0.417277	0.859053	0.985475	0.727105	0.862536	0.602304	0.757138	0.87413	0.913353	0.418881
GNS_HUMAN	0.956643	0.911174	0.964243	1.00746	0.939146	0.942207	0.923979	0.989604	0.908943	0.941377	0.973054	1.08675	1.38165	1.66573	1.06397	1.00754	1.00173	0.912868	1.20551	1.44656	1.0692	1.1507	-0.481136
GOGA2_HUMAN	0.97736	1.30576	1.02679	1.12771	1.13289	1.18658	0.987335	1.03876	1.14216	1.01353	1.0562	1.21364	1.32727	1.3174	1.20034	1.08858	1.01725	0.880137	1.07247	1.07729	1.07069	1.2043	-0.290933
GOGA3_HUMAN	1.0098	1.11465	1.04484	1.12561	1.05943	1.13108	1.04239	1.0012	0.859088	1.02619	0.99474	1.44628	1.07581	1.29731	0.937865	0.966076	0.897786	0.98974	0.836186	0.908359	0.848296	0.898282	-0.56283
GOLI4_HUMAN	1.34899	1.2593	1.63876	1.52743	1.05536	1.22359	1.254	1.02084	0.933131	1.03658	1.25382	1.25001	1.16583	1.16565	0.972949	0.82432	1.07589	0.90335	0.974308	0.723366	1.25476	1.13993	-0.142541
GOLP3_HUMAN	0.972926	1.01317	1.0113	1.03254	0.917428	0.888201	0.995192	0.967267	0.818193	1.01079	1.00216	1.03218	1.11084	0.804807	1.12962	1.08447	1.17132	1.13518	1.26087	1.48369	1.0209	0.996844	0.0438692
GORS2_HUMAN	0.749577	0.749081	1.00749	0.788018	0.941682	0.99678	0.878045	0.756161	0.616021	0.753456	0.649389	0.881469	0.842131	1.05898	0.614726	0.93375	0.951325	1.05246	1.24616	1.47334	0.896511	0.744586	-0.211822
GOSR1_HUMAN	1.15037	1.18849	1.1114	1.15559	1.17398	1.37757	1.17881	1.41554	1.0608	0.952882	1.01656	0.901378	1.21868	0.809647	1.25016	1.13262	1.16556	1.1119	1.30809	1.13272	1.71359	1.547	0.398985
GPDM_HUMAN	1.09887	1.17355	1.01292	1.08731	1.02462	1.09534	1.01156	1.04011	1.10847	1.047	0.986714	0.874586	1.13064	0.912166	0.995969	0.968433	1.02488	0.928545	0.977237	0.910566	1.05901	1.10253	0.485622
GPNMB_HUMAN	0.983241	1.12414	1.03619	1.13787	1.0866	1.16886	1.0253	1.06334	1.11408	1.07603	1.06944	1.23962	1.23166	1.91592	1.04549	1.00727	1.16251	0.974532	1.33316	1.50338	1.12036	1.21799	-0.613517
GPX1_HUMAN	0.879098	0.848351	0.817432	0.797426	0.82431	0.818021	0.9167	0.87507	0.743428	0.732249	0.914125	1.03811	0.924629	0.927731	0.905788	0.96879	0.870997	0.903384	0.657325	0.703543	0.874991	0.918116	-0.0205044
GPX7_HUMAN	1.11523	0.994185	0.966149	1.04557	0.94062	1.04927	0.956117	0.898662	1.069	1.10474	1.18334	1.2374	1.21945	1.99525	1.05539	1.0966	0.940985	0.940248	1.24103	1.36682	1.00101	1.16688	-0.667521
GRAP1_HUMAN	1.1217	1.07888	1.09811	1.05893	1.04564	1.00553	1.04753	0.938507	0.787867	0.701042	0.993843	0.969362	0.923045	1.17851	0.92621	0.948895	0.855287	0.906956	0.745997	0.942197	0.962935	1.08565	-0.0782532
GRB2_HUMAN	0.9272	0.940437	1.05593	0.979903	1.00404	0.951801	1.00413	0.958825	1.0622	1.0476	1.16933	1.15877	0.880001	0.469006	0.937895	1.04546	0.894333	0.987613	0.886656	1.4342	1.02277	0.998782	-0.0385704
GRHPR_HUMAN	0.86549	1.02048	0.823835	0.874125	1.02787	1.00637	1.10166	1.07343	1.05333	0.983769	0.937737	1.02512	0.936998	0.843458	0.947474	0.937586	1.0642	1.03573	0.937159	1.00562	0.977234	0.961175	0.222749
GRN_HUMAN	0.914378	1.01139	1.05165	1.162	0.987665	1.06514	0.973465	1.05764	1.11267	1.18297	0.704207	0.553814	1.28318	1.64969	1.02196	1.06214	1.08193	1.07894	1.27036	1.25461	1.27949	1.28478	0.0683868
GRP75_HUMAN	1.17365	1.21035	1.16495	1.19405	1.18581	1.3515	1.14543	1.21652	1.51883	1.40319	1.21037	1.41527	1.47477	1.89055	1.09493	1.0037	1.14662	1.03292	1.19554	1.44787	1.1193	1.27146	-0.632355
GRP78_HUMAN	0.983878	1.02998	1.00861	1.01305	1.03026	1.12136	0.973964	1.05625	1.00283	0.87702	0.99086	1.12749	1.40494	1.95619	1.06508	1.02541	1.03278	0.929492	1.24433	1.4261	1.10515	1.18317	-0.496943
GRPE1_HUMAN	1.15784	1.15151	1.20849	1.15021	1.16159	1.19756	1.08366	1.16981	1.42655	1.27007	1.2528	1.44887	1.60701	2.79646	1.11587	1.01921	1.10233	0.984011	1.1402	1.33215	1.0359	1.23302	-0.587042
GRSF1_HUMAN	1.31701	1.55353	1.20675	1.32246	1.13202	1.11939	1.19774	1.12975	1.0011	1.37326	1.37081	1.1701	1.50185	1.67115	1.22532	1.15023	1.3817	1.21107	1.36704	1.47898	0.948062	0.994363	-0.357574
GRWD1_HUMAN	0.912583	0.960819	0.92854	0.894371	1.00649	1.17415	1.01736	1.0421	1.21614	1.14061	1.12255	1.33419	1.33251	1.09569	1.10561	0.923865	1.07616	1.10747	1.21354	1.5394	0.950306	1.00862	-0.49549
GSDMD_HUMAN	0.882391	0.801458	0.944072	0.987281	0.900607	0.920573	1.0359	0.939236	1.12194	1.10551	0.950698	1.11909	1.03749	1.15712	1.15969	1.04424	0.937251	1.1664	0.933688	0.919033	0.845921	0.821681	-0.163259
GSH1_HUMAN	0.947995	1.14778	0.934379	1.11477	0.992741	0.885358	0.982227	0.99082	0.898032	0.981672	0.817596	0.923052	0.589952	0.450187	0.951297	0.896537	0.776717	0.765041	0.663734	0.671359	0.855523	1.00773	0.422859
GSHB_HUMAN	1.02229	0.769731	1.0653	0.919436	0.96867	0.843042	0.988986	0.917862	0.855775	1.03466	1.2539	0.907206	0.744807	0.515327	0.967169	1.10424	0.852539	1.01115	0.782617	0.843184	0.892067	0.769403	0.173826
GSHR_HUMAN	0.953086	0.922265	1.02723	1.00451	1.1379	1.13474	1.10793	1.0183	1.33512	1.36233	1.09745	1.05068	0.968591	0.959137	0.968156	1.00634	0.894987	1.00048	1.00399	1.12849	0.962851	0.876973	-0.188788
GSLG1_HUMAN	1.01101	1.03724	0.968976	1.02788	1.01409	1.084	1.03975	1.02966	0.789928	0.492463	0.579274	0.695449	1.014	1.24874	0.997733	0.978062	0.941525	0.970974	1.04134	0.749812	1.13297	1.09374	0.354563
GSTK1_HUMAN	0.972596	0.98274	0.91	0.943261	0.990527	1.05783	0.973194	1.03218	1.19434	1.0927	0.950651	1.02884	1.16372	1.29556	1.11094	0.981907	1.09185	0.946101	1.07136	0.918988	0.99772	1.13432	-0.176947
GSTM1_HUMAN	0.886186	1.00561	0.859686	0.886347	0.745658	0.760624	0.88684	0.777921	0.866641	1.00377	1.05127	1.14334	0.660286	0.304893	0.888716	0.887077	0.911451	1.08249	0.677082	0.688929	0.952906	0.784118	0.18983
GSTM3_HUMAN	1.01039	0.988744	1.07798	0.952047	1.04479	1.00982	1.01227	0.996272	0.974277	0.855203	0.948796	0.720072	0.901838	0.616784	1.04893	1.08495	0.884737	0.980695	0.659191	0.583739	0.970924	0.769816	0.66897
GSTO1_HUMAN	0.95084	0.846278	0.97354	0.919788	1.02773	0.910333	1.01822	0.99697	0.980432	0.895919	0.9128	0.710327	0.675425	0.433692	0.879644	1.01281	0.730248	0.957869	0.687615	0.730658	0.880204	0.888479	0.584171
GSTP1_HUMAN	0.991172	0.983121	0.929379	0.962616	1.02087	0.970484	0.954327	0.931197	1.15947	0.99055	0.915332	0.985861	0.694876	0.485711	0.874089	0.945915	0.839814	1.02582	0.756878	0.854181	0.849768	0.824499	0.370255
GT251_HUMAN	1.06843	1.06743	1.04917	1.03027	0.988858	1.00369	0.954419	1.00479	0.967709	0.879103	1.02398	1.11389	1.2367	1.7085	1.04304	0.970961	1.06951	0.95175	1.12314	1.00704	1.15854	1.19863	-0.433275
GTF2I_HUMAN	1.00134	1.033	1.09489	1.05817	1.01423	1.04914	0.898598	0.948652	0.894902	0.798468	0.81129	0.700365	0.894842	0.703742	1.02527	0.984569	1.02323	0.94467	0.999953	1.02635	1.14343	1.17853	0.63072
GTR1_HUMAN	0.93517	1.11864	0.786558	1.01465	1.05213	1.0334	1.12713	1.15321	0.910738	0.935687	0.907976	0.911715	1.0685	0.742222	1.05495	0.966543	1.15264	0.880988	1.03946	0.822678	0.975458	1.06765	0.498499
GUAA_HUMAN	0.97834	0.939491	0.914015	0.895328	0.984407	0.908125	0.99904	0.975253	1.00934	0.980518	0.993969	1.04032	0.840886	0.806397	0.898278	0.91225	0.887348	1.00718	0.808296	0.927497	0.90576	0.912222	0.0495562
H10_HUMAN	0.909396	1.12541	1.28985	1.10576	1.09357	1.28279	1.08427	0.96957	0.932873	0.409001	0.608596	0.50205	1.06294	0.530236	0.773268	0.825806	1.07903	0.661533	0.854115	0.419957	0.763501	0.919562	0.545205
H14_HUMAN	0.941454	1.17128	1.23917	1.08361	0.968602	1.1988	0.977244	0.911056	1.02544	0.488542	0.658695	0.471734	0.938466	0.441459	0.674873	0.736707	0.998146	0.696118	0.803665	0.416827	0.792284	0.931828	0.562121
H15_HUMAN	0.893724	1.26226	1.31851	1.16309	0.993293	1.25102	0.908081	0.856912	1.02847	0.476379	0.656689	0.515957	0.900448	0.703259	0.573598	0.709676	1.03055	0.702556	0.804111	0.463605	0.661067	0.823692	0.391657
H1X_HUMAN	0.939399	1.12332	1.17053	1.15441	0.93636	0.982515	0.917965	0.955171	0.973657	0.702012	0.971451	0.772148	1.08424	0.483658	0.889176	0.990934	1.06677	0.854913	0.980682	0.824666	0.870637	1.01151	0.525883
H2A2C_HUMAN	1.2345	0.856127	0.968442	1.48649	1.00017	1.11049	1.08542	1.02802	0.861867	0.955609	1.09907	0.961229	1.24251	0.993462	1.00427	0.98214	1.17794	0.977595	1.08424	0.950624	2.31548	0.904834	0.0876964
H2AZ_HUMAN	0.884405	0.919094	0.74757	0.961592	1.00611	1.11325	1.19015	1.11014	1.03214	1.20459	1.33754	1.09669	1.27638	1.47112	1.05404	1.03338	1.1737	1.01583	1.38425	1.42841	1.17505	1.11963	-0.570642
H2AY_HUMAN	1.13051	1.22591	1.0777	1.20678	1.09929	1.20599	0.989934	1.0301	1.15038	0.998882	1.11415	0.949103	1.15844	0.777477	1.02286	0.976247	1.0093	0.968988	1.07862	0.865205	1.02609	1.11044	0.321466
H2B2F_HUMAN	1.11581	1.07182	1.11888	1.11385	1.02797	1.08507	1.00513	1.0324	0.979721	0.902952	1.07505	0.950554	1.16216	1.34866	0.946073	0.932767	1.01075	0.918418	1.13186	1.16004	1.06714	1.14044	-0.390348
H31_HUMAN	1.34741	1.88872	1.41778	1.4466	0.418833	1.03088	1.06469	1.0769	0.596683	1.5358	0.988283	0.793832	1.36423	0.77254	0.816121	0.584701	5.038	4.30996	5.3155	7.1301	1.53932	1.02928	-0.0236721
H32_HUMAN	1.80486	2.4502	2.06109	2.05021	1.147	1.79407	1.2432	1.43952	1.39039	1.25014	1.28512	1.03694	1.12694	0.776387	0.855946	0.774578	1.0764	0.799318	0.998626	0.633045	0.841618	0.923872	0.145782
H33_HUMAN	1.24363	1.723	1.96612	1.73325	0.909299	1.07313	1.25258	1.01932	0.757728	1.71368	1.58968	1.153	1.87088	1.03207	1.33127	0.99828	2.01776	1.5801	1.90061	1.5227	1.05138	0.880835	-0.0250514
H4_HUMAN	1.72412	2.12335	1.64463	1.78414	1.26101	1.62188	1.30301	1.28834	1.31821	0.93599	1.03439	0.822663	1.15731	0.781214	0.906991	0.780521	1.02441	0.750559	1.11393	0.913552	0.818357	0.948495	0.24777
H90B2_HUMAN	1.0777	1.28232	0.979736	1.21562	0.885204	0.922321	1.23366	1.03147	0.364937	1.8431	1.15938	1.43622	1.44048	0.926905	1.31337	1.11191	1.3977	1.13492	1.01488	1.15223	0.875077	0.919663	-0.133186
HAT1_HUMAN	0.913151	0.875769	0.866357	0.945586	0.950492	1.02679	0.935545	0.901055	0.787647	0.855122	0.777456	0.831208	0.692101	0.685828	0.940821	0.949859	0.880935	0.962579	0.826661	0.968639	0.882429	0.924057	0.469795
HAX1_HUMAN	1.11674	0.867873	0.937875	0.941007	0.793277	0.931506	0.812761	0.802198	1.28092	0.948899	1.50472	1.59699	1.42188	1.78904	1.05873	0.782577	1.37816	1.11693	1.16165	1.38606	1.16694	1.31757	-0.662261
HBS1L_HUMAN	1.0581	0.98731	1.20536	1.08715	0.932868	0.91892	0.862813	0.897923	0.859716	0.982343	0.899309	0.888118	0.933639	0.911906	0.975873	0.987178	0.895582	0.941677	0.847463	0.845846	0.894556	1.14685	0.271303
HCD2_HUMAN	1.17797	1.19554	1.08847	1.12553	1.1381	1.1956	1.13526	1.13586	1.43517	1.45134	1.22654	1.43192	1.5444	2.08982	1.06797	0.996135	1.11801	0.96449	1.12818	1.28361	1.01524	1.14037	-0.619553
HCDH_HUMAN	1.13818	1.12578	1.10004	1.06328	1.10244	1.1857	1.13735	1.14431	1.30771	1.5024	1.1922	1.51082	1.63619	2.61867	1.17114	1.06918	1.22698	1.06071	1.20584	1.36527	1.04537	1.14916	-0.599294
HCFC1_HUMAN	0.97095	0.975787	0.88721	0.935958	1.05502	1.1706	0.931157	1.05969	1.17095	1.04536	1.02621	0.990873	1.0586	0.949204	1.00793	1.02065	1.01698	0.980852	1.14646	1.06611	1.14413	1.15134	-0.0152315
HCLS1_HUMAN	0.928923	0.91129	1.01423	0.951659	0.997233	0.967648	0.99994	0.99417	0.916676	0.834722	0.889437	0.885846	0.789328	0.534941	0.93578	0.959403	0.804855	0.928038	0.80456	0.875429	1.00222	0.868993	0.514508
HD_HUMAN	0.87402	0.76174	0.821974	0.827463	0.822976	0.589068	1.01075	0.8073	0.762807	1.12252	0.797315	0.884824	0.806157	0.688703	0.994019	1.01453	0.967539	1.06511	0.625024	0.637525	0.748488	0.817515	0.405909
HDAC1_HUMAN	0.955969	1.13697	0.785161	0.971668	1.04383	1.06372	0.969168	1.03296	1.15108	0.985826	0.863411	0.786408	0.969179	0.9639	1.04676	0.963914	1.07372	0.965244	1.01575	1.01171	1.24394	1.14746	0.468219
HDAC2_HUMAN	1.03698	1.02858	0.965061	1.04333	1.13715	1.11804	0.997666	1.05746	1.00951	0.926703	0.968246	0.914015	1.12918	0.991828	1.02836	1.06081	1.01676	0.926567	0.9398	0.885402	1.0897	1.16206	0.397168
HDGF_HUMAN	0.849225	0.891268	0.886967	0.921137	1.04724	0.991274	1.04909	1.0109	0.969541	0.806701	0.899982	0.815396	0.810764	0.545719	0.935273	0.985128	0.822767	0.888801	0.775299	0.946614	0.906041	0.912024	0.525682
HDGR2_HUMAN	0.852097	1.04093	0.957209	1.00691	0.843742	1.14594	0.985855	1.12212	0.978488	0.918229	0.896409	0.954133	0.905198	0.729748	0.896049	0.904539	1.07566	1.09378	1.48678	0.606624	0.988415	1.20737	0.178726
HDHD2_HUMAN	0.894959	0.78651	1.05046	0.926519	0.958915	0.874485	0.910563	0.882846	0.976546	1.0715	0.960397	1.05177	0.701186	0.578742	0.844769	0.919929	0.930563	1.05049	0.814408	0.761695	0.854926	0.773089	0.141743
HEAT1_HUMAN	1.07865	1.08354	1.00865	1.01506	1.02707	0.98243	0.995285	1.01084	0.905879	1.15641	0.936718	0.705456	0.944152	0.595829	1.08849	1.03337	1.14305	1.04559	1.06844	0.506253	1.00297	0.928484	0.652515
HEAT3_HUMAN	0.922479	0.88971	1.17189	0.895411	0.880763	0.749195	0.953551	0.908324	0.747066	0.625437	0.817445	0.743867	0.615246	0.69691	0.739898	0.916396	0.772734	0.868483	0.74936	0.510402	0.824922	0.958773	0.410026
HEBP1_HUMAN	0.85348	0.894995	0.995519	0.953123	0.990809	1.10227	1.10044	1.22056	1.08149	1.0563	1.23412	1.29153	0.927611	0.699615	0.910316	0.9008	1.00715	1.04352	0.927747	1.04635	1.07038	0.936962	-0.276942
HEBP2_HUMAN	1.29276	1.00859	0.978113	0.968173	1.31549	1.04712	0.963775	0.89811	0.963325	0.807921	0.883982	0.826652	0.840911	0.722859	1.01255	1.15046	0.846116	1.01722	0.746105	0.859103	0.815123	0.785107	0.503292
HEM3_HUMAN	1.09525	1.13453	1.14183	1.05211	1.02052	0.875157	1.14335	0.932632	1.14086	0.89201	1.12804	0.964013	0.73858	0.475924	0.8788	0.936282	0.804027	1.06264	0.836622	0.853355	0.905146	0.912195	0.333155
HEM6_HUMAN	1.16725	1.04407	0.931954	1.04994	0.999893	1.00841	0.936574	0.953918	0.87659	0.972708	1.05451	1.14386	1.59009	1.24082	1.12585	1.19156	0.953495	0.901893	1.07205	0.90581	1.063	1.11076	-0.155622
HEXA_HUMAN	1.02464	1.01323	0.817365	1.04217	0.961639	1.03478	0.959779	1.00691	0.827789	0.991379	1.07658	1.13044	1.39809	1.5036	1.0979	1.12448	1.03647	0.923216	1.19748	1.27876	1.05362	1.0783	-0.482511
HEXB_HUMAN	0.952453	0.995912	0.911679	0.980655	1.0179	1.0497	1.00434	1.00396	1.00613	0.897079	0.962966	1.17434	1.22228	1.53855	1.00355	1.01214	1.03966	0.968625	1.19841	1.32551	1.06475	1.17353	-0.531403
HGS_HUMAN	1.03025	1.01811	1.00185	1.20548	1.17694	1.04403	1.35984	1.34168	0.748556	1.02878	0.747445	0.865383	0.755506	0.452508	0.878063	0.937989	0.930068	1.11157	1.24962	1.55594	1.26873	1.22497	0.273206
HIBCH_HUMAN	1.3078	1.1244	1.11918	1.27947	1.07747	0.991852	0.885332	1.06957	1.31012	1.5581	1.39622	1.33473	1.45421	1.48227	1.18597	1.18291	1.1131	0.715115	1.07055	1.11107	1.29977	1.42515	-0.432189
HIG1A_HUMAN	0.761271	0.874486	0.888175	1.07622	1.32438	1.19861	1.17888	1.15056	1.46833	1.66541	1.31443	0.766357	1.47103	1.98129	1.61116	1.30259	1.40303	1.17655	1.41808	1.26077	1.42859	1.01713	-0.138053
HIG2A_HUMAN	1.00034	0.943152	1.00267	1.05684	1.26343	1.04731	1.21531	1.17429	1.07337	1.15287	1.23075	1.01347	1.11577	1.26189	1.22378	1.15256	1.47762	1.46485	1.64199	1.13448	1.09664	0.929706	-0.0262149
HINT1_HUMAN	1.00237	1.02312	0.998165	0.878831	1.0365	0.919274	1.16932	1.08722	0.737465	1.00981	1.00791	1.05362	0.906283	0.464605	1.00844	1.06301	1.08252	1.15745	0.950458	1.44537	0.857424	0.796207	0.194703
HINT2_HUMAN	1.13463	1.24414	1.08091	1.06929	1.10526	1.16933	1.01734	1.03249	1.08028	1.18179	1.17037	1.358	1.39569	2.14231	1.02611	0.951314	1.17793	0.992673	1.04752	1.08697	1.08804	1.10309	-0.592608
HM13_HUMAN	1.12299	1.17503	1.15449	1.10391	1.0138	1.1578	1.05812	1.06806	1.19194	0.821456	0.770115	0.785826	1.00184	0.999309	0.996142	0.920662	0.953746	0.752385	0.947231	0.663142	0.907445	1.08253	0.430093
HMCS1_HUMAN	1.06114	0.987708	0.865496	0.926012	0.948331	0.789045	0.909496	0.859274	1.4159	1.20579	1.27044	1.4079	0.64504	0.7822	0.86109	0.925972	0.845744	0.990304	0.91973	1.02231	0.864085	1.01031	-0.337876
HMGA1_HUMAN	0.956962	0.959725	0.968527	0.982567	0.983527	0.968709	0.964572	0.989698	0.937639	0.892906	0.755228	0.729646	0.988391	0.516978	0.93816	0.923855	1.0047	0.918437	1.07897	0.856757	1.03192	1.0196	0.729028
HMGB1_HUMAN	0.966053	1.01214	0.995098	0.951361	1.03649	0.933823	0.996167	0.876745	0.856018	0.728824	0.887099	0.801911	0.84423	0.539627	0.880136	0.964982	0.884624	0.910829	0.777619	0.831623	0.985271	0.88838	0.639417
HMGB2_HUMAN	1.00698	0.929786	0.993018	1.01072	0.911931	0.899856	0.968682	0.876799	0.858369	0.652189	0.749296	0.70081	0.853558	0.491942	0.911751	1.06303	1.02445	0.967266	0.833438	0.88319	1.04269	0.842364	0.787432
HMGCL_HUMAN	1.15777	1.14161	1.07616	1.04071	1.06313	1.17677	1.12765	1.12342	1.27642	1.16342	1.31974	1.30665	1.42642	1.77982	1.14876	1.05025	1.24176	1.04694	1.21026	1.29618	1.15671	1.17219	-0.645624
HMGN1_HUMAN	1.0452	1.21114	1.12455	1.12302	1.26331	1.29907	1.0141	1.49809	0.812679	0.86805	0.817164	0.555823	1.11239	0.693671	1.05912	0.976958	1.02355	0.87288	0.967853	0.684558	0.837136	0.755127	0.519654
HMGN2_HUMAN	1.38584	1.54386	1.30043	1.50844	1.10602	1.10568	1.04906	1.18529	0.784143	1.00512	0.501586	0.499271	1.03585	0.7398	1.02655	1.15197	1.03395	0.90223	1.01672	0.950927	0.838554	0.87901	0.60885
HMHA1_HUMAN	0.98335	0.914909	1.00127	0.878744	1.03692	0.885403	0.912088	0.893849	0.922395	0.913393	1.09623	0.684406	0.893471	1.09748	0.90788	1.05745	0.893407	0.967963	0.737662	0.491198	0.893382	0.87672	0.21888
HMOX1_HUMAN	1.17803	1.29509	2.27173	2.70376	2.9638	4.66616	1.77719	2.01587	6.91981	7.68592	4.1918	5.34832	0.693354	0.495897	1.03016	0.959665	1.22786	1.06132	14.3761	15.8497	1.05687	1.11403	-0.392518
HMOX2_HUMAN	1.27075	1.17615	0.982573	1.08204	1.0232	1.10407	1.18072	1.03121	1.1578	1.00206	0.96238	1.0884	1.12142	1.37096	1.06622	1.10565	1.1405	0.891496	1.25937	0.82116	0.980839	1.25747	-0.0492957
HNRDL_HUMAN	1.00939	1.03979	0.977198	1.02378	1.00783	1.12039	1.00097	1.08155	0.972607	0.898516	1.02521	0.872962	1.23028	0.899756	1.03793	0.962079	1.03589	1.00762	1.20075	1.43993	1.11095	1.19244	0.0534575
HNRH1_HUMAN	0.965944	0.99433	0.959811	1.00623	1.04825	1.15039	0.988306	1.11159	1.06797	0.966731	0.981139	0.955345	1.30201	1.27905	1.00982	0.98726	0.965728	0.96258	1.2163	1.33438	1.11151	1.15147	-0.296583
HNRH2_HUMAN	1.048	1.09459	0.952	1.01749	1.01503	1.11525	0.879247	1.01272	1.10128	0.999976	0.783734	0.928691	1.15687	1.19741	0.959178	0.948015	0.980943	1.01855	1.29358	1.50047	1.18499	1.26717	-0.0992428
HNRH3_HUMAN	1.00538	1.04936	1.12088	1.13801	1.12334	1.29479	1.00392	1.23596	1.06999	1.17709	1.06234	1.18183	1.5105	1.71414	1.09919	1.10254	1.0106	0.970847	1.23686	1.51145	1.16655	1.29147	-0.529544
HNRL1_HUMAN	0.979734	1.05029	0.986466	1.05206	0.980695	0.995867	0.950897	1.01762	0.938445	0.88397	0.94221	0.894992	1.08368	0.886955	1.02007	0.956263	0.98099	0.996371	1.04704	1.13819	1.104	1.15234	0.311146
HNRL2_HUMAN	0.943181	1.03923	1.01872	1.03034	1.03773	1.1533	0.945706	1.08009	0.996903	0.894111	0.980181	0.93257	1.17309	1.04452	1.01176	0.968285	0.984852	0.993438	1.12716	1.22872	1.14764	1.21651	-0.0480696
HNRLL_HUMAN	0.954911	0.945142	0.760672	0.947412	0.896069	0.883625	0.889473	0.967976	0.80394	0.858681	0.86587	0.917425	1.11603	1.06957	0.965525	0.901065	0.900024	0.863882	1.10462	0.991598	0.933091	1.11043	-0.13808
HNRPC_HUMAN	1.08113	1.08534	1.0563	1.01402	1.06613	1.20071	0.95001	1.08534	1.13161	1.0614	1.05688	1.04847	1.44558	1.62292	1.0479	1.01717	1.04134	0.964907	1.19756	1.34417	1.15071	1.17044	-0.448459
HNRPD_HUMAN	0.96524	0.996597	0.89073	0.961544	0.977797	1.02697	0.916455	1.02547	0.947418	0.953169	0.868426	0.881364	1.10955	0.801831	1.00099	0.956636	0.988723	0.938213	1.06134	1.28399	0.997633	1.0928	0.223299
HNRPF_HUMAN	0.962685	1.00247	0.974069	1.02097	0.963485	1.01529	0.907134	1.05059	0.99101	0.980481	0.940478	0.924102	1.07357	0.969854	0.990292	0.933767	1.0242	0.979104	1.33716	1.54666	1.13869	1.19884	-0.117563
HNRPK_HUMAN	0.955495	1.01293	0.988528	0.972346	1.01399	1.05088	0.961744	1.04776	1.0547	1.04036	0.923698	0.869687	1.15229	1.17241	0.966485	0.96236	0.94621	0.929348	1.18613	1.33796	1.00208	1.04429	-0.203694
HNRPL_HUMAN	1.03567	1.03677	1.05091	1.09007	1.03839	1.15435	0.970924	1.10061	1.0976	1.01606	0.93608	0.846926	1.23712	1.03776	1.08667	1.02026	1.06585	1.04762	1.2548	1.36308	1.23444	1.20076	0.156633
HNRPM_HUMAN	0.997115	1.02884	1.03395	1.08263	1.01759	1.09735	0.944816	1.05558	1.02302	0.985736	0.837314	0.768888	1.31496	1.57419	1.00364	0.976777	1.01611	0.962127	1.18088	1.407	1.13592	1.15674	-0.166143
HNRPQ_HUMAN	1.0822	1.1315	1.02939	1.06034	1.05993	1.10922	1.04161	1.1086	0.967736	0.767477	0.995948	0.888702	1.07971	1.00872	1.04341	1.01974	0.985938	0.987521	0.982083	0.989299	0.987504	1.06459	0.372693
HNRPR_HUMAN	1.10837	1.10379	1.07409	1.0377	1.10864	1.17703	1.08717	1.21701	1.06195	0.855244	1.03238	0.854245	1.22725	1.10478	1.08496	1.04381	1.06508	0.93647	1.01492	0.830028	0.979465	1.04478	0.328885
HNRPU_HUMAN	1.10568	1.16054	1.14953	1.15681	1.09013	1.19952	1.06918	1.10771	1.09249	0.976042	1.00001	0.872125	1.23424	0.860557	1.04773	0.981698	1.00169	0.944345	1.1257	0.991689	1.14941	1.16261	0.427142
HP1B3_HUMAN	1.09848	1.23041	1.21387	1.19412	1.21184	1.24403	1.37117	1.2044	1.16955	1.16653	1.05168	1.185	0.946095	0.889046	0.916523	0.886103	1.14319	0.915678	1.04874	0.632369	0.877674	0.988773	0.0845716
HPBP1_HUMAN	0.992746	0.938721	1.04553	0.842886	0.788751	0.782814	0.80413	0.753397	0.945801	1.22275	1.1105	0.936213	0.557407	0.605631	0.801974	0.819347	0.864362	0.987825	0.570895	0.650388	0.856154	0.892053	0.0627772
HPCL1_HUMAN	0.894522	0.982188	0.876988	0.901744	0.916499	0.986692	0.994312	0.911319	1.0107	0.931733	0.913299	1.05072	1.00755	0.861023	0.892586	0.952203	1.03913	0.988007	1.30988	1.39676	0.96445	0.991253	-0.175105
HPRT_HUMAN	1.01691	0.914799	0.973949	0.936507	0.988296	0.883921	0.994858	0.927174	0.951856	0.958719	1.02095	0.893125	0.702221	0.486029	0.942737	1.0051	0.838927	0.892365	0.699546	0.551385	0.916502	0.902587	0.441333
HS105_HUMAN	0.905289	0.928025	0.934769	0.938785	1.0859	1.1157	0.965735	0.97239	1.33882	1.43442	1.10615	1.18362	0.787543	0.688972	0.959779	0.984009	0.881421	0.954251	1.28617	1.59255	0.983997	1.00565	-0.25451
HS2ST_HUMAN	1.02863	0.949178	0.851944	0.707029	1.04546	1.18725	1.14303	1.03927	1.06038	1.16871	0.949631	1.19615	1.40097	1.68535	1.24232	1.16607	1.16731	1.11259	1.18674	1.02856	1.14986	1.26337	-0.276282
HS71B_HUMAN	0.899865	0.968496	1.21996	1.32186	1.98985	3.96508	1.24237	1.26901	5.93993	8.04304	4.9697	6.86086	0.810967	0.608592	0.973093	1.01921	0.924197	0.96827	6.59116	14.848	1.02959	1.03293	-0.497743
HS90A_HUMAN	0.939268	0.915292	0.930209	0.952573	1.01169	0.975276	1.01116	0.964466	0.975396	1.02469	0.962287	0.931214	0.792086	0.666755	0.957936	1.01707	0.887715	0.993949	0.897696	0.973572	1.01167	0.966441	0.39328
HS90B_HUMAN	0.908231	0.889823	0.973574	0.965408	0.968323	0.964068	0.998759	0.93669	1.01981	1.07527	0.95252	0.903183	0.846525	0.895235	0.958285	1.00643	0.859739	0.97437	0.903904	0.897695	1.0163	0.960226	0.23319
HSDL2_HUMAN	1.26244	1.1875	1.11076	1.21804	0.936996	1.16766	1.08807	1.10753	1.42076	1.43607	1.33824	1.48097	1.47631	1.69446	1.22793	0.935869	1.42531	1.08932	1.4223	1.57031	1.09113	1.26185	-0.631632
HSP13_HUMAN	1.37023	1.20585	0.998061	1.12071	0.79231	0.984613	0.754584	0.740171	1.20241	1.16475	1.15658	1.41796	1.50161	1.49993	1.17902	0.976293	1.06737	0.792191	1.16713	1.52564	1.09329	1.16734	-0.494462
HSP74_HUMAN	0.88981	0.887154	0.960324	0.929403	1.03167	1.03189	0.986302	0.968464	1.01936	0.969922	0.900988	0.841633	0.800673	0.639409	0.918437	0.951551	0.872885	0.972621	0.893839	0.950901	0.89957	0.942709	0.474837
HSP7C_HUMAN	0.91783	0.978609	0.972306	0.975331	1.08189	1.12698	1.03283	1.0397	1.10157	1.07593	1.01208	1.02366	0.876256	0.604048	0.986122	1.01851	0.904597	0.976936	1.0476	1.35834	1.00383	0.998428	0.074715
HSPB1_HUMAN	0.937769	0.943928	0.980176	0.943375	1.07125	1.06169	1.07164	1.01402	1.13711	1.3071	1.11631	1.41038	0.924796	0.86022	0.966609	1.06587	0.838646	0.988103	0.879754	1.27676	0.94935	0.919537	-0.437022
HTAI2_HUMAN	1.02049	0.997782	1.00616	0.9692	0.973124	0.97257	0.826498	0.899494	1.09466	1.33877	1.15226	1.288	1.22466	1.20336	1.12347	1.05156	0.98876	1.07068	1.17335	1.33528	0.960868	1.11239	-0.591598
HTRA2_HUMAN	0.918102	1.06993	0.781053	1.01079	0.943021	1.115	1.21866	1.14421	0.819788	1.04431	1.40914	1.15316	1.41888	1.69054	1.04079	0.902549	0.918154	0.721988	0.944243	0.865047	1.05935	1.08792	-0.558913
HUWE1_HUMAN	0.917542	1.00665	0.933524	0.903798	1.01222	0.978149	0.952246	0.944783	0.926882	0.856842	0.851608	0.661942	0.726993	0.793336	0.917202	0.985686	0.934332	1.00628	0.925944	0.736879	0.87699	0.835375	0.690876
HXK1_HUMAN	0.911951	0.903431	0.822668	0.851895	0.908921	0.891706	0.873971	0.870731	0.758689	0.769814	0.820004	0.735685	0.73315	0.645072	0.934828	0.862389	0.997111	0.953334	0.818109	0.540711	0.926331	0.973319	0.636999
HXK2_HUMAN	0.649467	0.900985	0.779773	0.776736	0.841333	0.978737	0.863341	0.90491	0.9106	0.887026	0.612565	0.835193	0.79843	0.962087	0.806401	0.787774	0.868337	0.808574	1.10002	1.16903	0.709464	0.63383	-0.127484
HYEP_HUMAN	1.15722	1.11525	1.1371	1.1521	1.08937	1.14506	1.03811	1.02341	1.33811	1.09655	1.10232	1.18118	1.16126	1.20658	1.05054	1.0594	1.02771	0.837923	1.13379	0.787591	0.865133	1.03566	-0.215259
HYOU1_HUMAN	1.03423	1.05547	1.04807	1.04367	1.04768	1.05995	0.94685	1.05414	1.02103	0.890315	1.01889	1.17996	1.4328	2.11223	1.05391	0.989909	1.08304	0.973035	1.28792	1.44441	1.11726	1.17661	-0.519911
HYPK_HUMAN	0.876764	0.829996	0.897117	1.03972	0.89386	0.895993	1.05792	0.984683	0.891272	0.789088	1.17603	1.05614	0.725551	0.485743	0.717541	0.808924	0.848734	1.07869	0.754116	1.0805	1.00479	0.895374	-0.0444081
I2BP2_HUMAN	0.773807	0.846941	0.778829	0.833182	0.927179	0.919548	0.993596	0.976734	0.68895	0.613436	0.647576	0.437022	0.683718	0.461142	0.979012	0.881641	0.879925	0.879606	0.977805	0.994561	0.873948	1.00424	0.649585
ICAM1_HUMAN	1.004	1.04946	1.05286	0.982592	1.19869	1.32689	1.0805	1.16482	1.11325	0.823268	1.0246	1.05724	2.21064	1.22596	1.01831	0.960189	0.937651	0.936105	2.49988	1.9183	0.909512	1.13373	-0.220504
IDH3A_HUMAN	1.15864	1.10579	1.03848	1.1158	1.12085	1.21241	1.17663	1.20386	1.30451	1.27581	1.23244	1.24729	1.49226	1.60909	1.18886	1.07173	1.3157	1.04761	1.18801	1.35418	1.09295	1.21364	-0.507344
IDH3B_HUMAN	1.12018	1.08885	1.10324	1.04514	1.03674	1.27673	1.03277	1.0435	1.29705	1.15411	0.874623	1.01423	1.52763	1.99565	1.10624	1.02395	1.10308	0.988267	1.07965	1.23657	1.0273	1.18742	-0.300627
IDH3G_HUMAN	1.28608	1.42731	1.05003	1.19416	1.07909	1.18007	1.19854	1.11562	1.4816	1.4648	1.12942	1.40685	1.29356	1.53943	0.970998	1.01859	1.10212	0.996512	0.986861	0.985058	1.05847	1.17371	-0.366861
IDHC_HUMAN	0.975002	0.911064	0.90383	0.903717	1.00759	0.892927	1.00656	0.964826	0.944745	0.858123	0.981766	1.06105	0.712562	0.544642	0.92953	1.03141	0.803127	0.916776	0.717724	0.795537	0.936347	0.964236	0.290993
IDHP_HUMAN	1.12978	1.15981	1.0385	1.06786	1.09611	1.15619	1.15812	1.14945	1.28667	1.16573	1.11293	1.2329	1.37205	1.44373	1.11315	1.02393	1.10955	0.961261	1.01311	0.904204	1.11604	1.245	-0.303521
IDI1_HUMAN	0.976079	1.01709	1.19418	1.24419	1.17231	0.952432	1.07756	1.01596	1.05965	1.14132	1.08336	1.14076	0.91297	0.904005	0.963651	1.02384	0.816057	1.05974	0.769783	0.717003	0.983327	0.868401	0.0250676
IF16_HUMAN	0.951425	0.975392	0.893593	0.874709	0.905472	0.959836	0.959238	0.968473	0.727275	0.716236	0.669996	0.763582	0.929552	1.2553	0.932011	0.894372	0.921985	0.873326	0.742753	0.780829	0.724766	0.879777	0.148311
IF2A_HUMAN	0.955386	0.93172	0.965468	0.959105	0.943671	0.961994	0.914622	0.947047	0.924326	0.892998	0.902358	0.885284	0.85757	0.792158	1.01334	0.99944	0.96212	0.977386	0.941195	1.00347	0.993375	0.996251	0.601399
IF2B_HUMAN	0.944104	0.909626	0.896159	0.868341	0.952447	1.00345	0.945105	0.929754	0.869568	0.836968	0.82259	0.889866	0.863598	0.846499	0.963538	1.00794	0.944808	0.985335	0.901924	0.977705	0.955112	0.958057	0.538824
IF2B2_HUMAN	0.956136	0.957072	0.913601	1.04171	0.995253	0.984721	0.969039	0.985583	0.998885	0.935098	0.983951	1.0552	1.17708	1.51425	1.00507	0.942378	0.946731	0.928102	1.05389	1.23269	1.09459	1.13759	-0.513075
IF2B3_HUMAN	1.29963	1.03742	0.878476	1.20724	1.08056	0.869836	1.04277	0.887069	1.33486	1.15031	1.52419	1.82522	1.29302	1.68639	1.02539	1.00051	1.22587	0.981524	1.34778	1.66853	0.971379	1.02239	-0.755062
IF2G_HUMAN	0.930306	0.846336	0.932017	0.913328	1.00874	0.963349	0.890363	0.944632	0.875924	0.870676	0.926527	0.90331	0.828134	0.813433	0.975042	0.981732	0.907386	0.998398	0.882512	0.668264	1.04689	0.979727	0.39861
IF2P_HUMAN	0.83743	0.849211	0.734804	0.826369	0.97926	0.944138	1.09455	1.00464	0.755467	0.781245	0.836611	0.874791	0.89387	0.885384	0.992939	0.972282	0.977632	0.946254	0.752535	0.276733	0.947216	0.949551	0.351477
IF4A1_HUMAN	0.904909	0.878723	0.95287	0.881339	0.948486	0.896047	0.932729	0.90574	0.893271	0.84827	0.842685	0.814909	0.678908	0.560047	0.930725	0.961425	0.836735	0.967551	0.831935	0.818949	1.00067	0.9374	0.613835
IF4A2_HUMAN	0.934331	0.891728	0.922262	0.878639	0.970735	0.878053	0.954825	0.941468	0.84429	0.888353	0.815215	0.852611	0.78162	0.491469	1.03888	1.0943	0.951938	0.973173	0.894525	0.842353	0.973133	0.929427	0.704232
IF4A3_HUMAN	0.973235	0.919023	1.00627	0.970418	0.996674	1.11746	0.922438	1.02162	1.03536	0.981743	1.01146	0.929178	0.926984	0.954507	1.02305	0.983961	1.02715	0.980643	1.20662	1.17954	1.19845	1.19465	-0.0424826
IF4E_HUMAN	0.93401	0.972241	0.958102	0.895298	0.933136	0.905025	0.924397	0.917474	0.967846	0.786613	0.897251	0.883338	0.723329	0.59437	0.895906	0.94247	0.813827	0.999504	0.828649	0.862997	1.10231	1.12197	0.464764
IF4G2_HUMAN	0.914258	0.869384	0.944933	0.887652	0.983479	0.913888	0.920181	0.908403	0.955061	0.861787	0.845569	0.880713	0.792503	0.653551	0.942579	0.995642	0.889496	0.939951	0.911069	0.874096	0.929625	0.886947	0.622045
IF4G3_HUMAN	1.2264	1.04001	0.861244	1.13923	0.82797	0.821234	0.972294	0.88791	0.913728	1.43235	1.18519	1.39886	0.861791	0.823156	1.04981	1.06047	1.06303	1.0323	0.844643	0.879774	0.986613	0.943316	-0.202223
IF4H_HUMAN	0.876315	0.888654	1.02375	0.944233	0.985847	0.924806	0.986219	0.957164	1.02306	0.954672	1.03427	1.05207	0.863166	0.691835	0.942375	1.0221	0.83175	0.998753	0.768643	0.797343	0.961558	0.915089	0.190463
IF5_HUMAN	1.01607	0.962544	1.07066	1.02875	0.992012	1.03744	1.02311	0.9944	1.31684	1.28837	1.09602	1.12659	0.860072	0.864987	0.972341	1.08413	0.867529	0.964904	0.962619	1.11676	0.960836	0.957526	-0.158345
IF5A1_HUMAN	0.940677	0.905717	1.02131	0.974961	1.01628	0.967362	1.0512	1.00529	1.03781	1.04607	0.967407	0.99896	0.807823	0.643613	1.00015	1.06319	0.876745	1.0193	0.851289	1.11967	0.985158	0.862553	0.281993
IF6_HUMAN	0.968182	0.967671	1.01107	1.01639	0.996374	0.915118	0.952014	0.980461	1.18238	1.04754	1.21653	1.0666	0.922666	0.858505	0.920834	0.922422	0.912785	1.03928	0.859704	0.942849	1.04395	1.03908	-0.16595
IKIP_HUMAN	1.00012	0.976853	0.994497	0.810169	1.0628	1.24331	1.07752	1.1316	1.11354	1.14386	1.16368	1.00469	1.23153	1.20584	1.15892	1.05424	1.18417	1.07801	1.07717	1.09844	0.881435	1.09168	-0.202253
IKKB_HUMAN	0.874904	0.74239	0.82617	0.782109	0.88503	1.09599	1.04907	0.82555	0.997429	0.944955	0.942811	0.976306	1.00619	1.10456	1.16335	1.20192	1.23871	1.31452	0.953197	1.21236	1.00424	0.857092	0.0616768
ILEU_HUMAN	0.978982	0.891858	0.88069	0.879223	0.944558	0.868509	0.940166	0.861073	0.942926	0.958901	1.01217	1.02654	0.577828	0.115678	0.885528	0.897912	0.874232	1.02308	0.672761	0.656194	0.808539	0.79028	0.344993
ILF2_HUMAN	1.02022	0.989233	0.992116	0.97371	0.970306	1.04383	0.897287	0.948281	1.02561	0.910226	1.02752	0.914627	1.04855	0.859964	1.00822	0.985756	1.01789	1.02731	1.1184	0.998538	1.04764	1.12124	0.276852
ILF3_HUMAN	1.08526	1.08043	1.02016	1.04569	1.05133	1.12576	0.952641	1.07932	0.928676	0.878996	0.885122	0.842966	1.02298	0.743069	1.01865	0.999747	1.02008	0.97106	1.0532	0.931091	1.14145	1.12588	0.617822
ILK_HUMAN	1.03849	0.93108	0.949392	0.91763	0.975033	0.956556	0.9792	0.936795	0.984842	0.981057	0.803769	0.857312	0.757326	0.722541	0.88865	0.973644	0.86861	0.99341	0.722677	0.701936	0.953582	0.92534	0.602653
ILKAP_HUMAN	0.91091	0.899261	0.971303	0.958277	0.957104	0.972013	1.08053	0.95086	1.0206	1.13179	1.22924	1.13213	1.01098	1.00503	0.977455	1.0236	0.974478	0.954961	0.859612	1.06884	0.950198	1.04315	-0.538652
ILVBL_HUMAN	1.06062	1.03587	1.02433	0.964375	0.867107	0.9291	0.915874	0.882087	0.975686	0.900756	0.7007	0.669613	0.814779	0.953615	0.798422	0.964239	1.0317	0.905908	1.03342	0.690393	0.913124	1.06802	0.533175
IMA1_HUMAN	1.07226	0.970705	0.985066	1.04768	0.916359	0.946822	0.948804	0.981899	0.899137	0.809933	0.980378	0.875342	0.722247	0.497211	0.992028	1.01453	1.02193	1.06423	0.907352	0.763067	1.2028	1.16473	0.535302
IMA3_HUMAN	1.02721	0.962809	0.968052	0.989171	1.11541	1.0486	1.00108	0.98744	1.10144	1.18285	1.2112	1.24601	1.07098	1.18754	1.00451	1.01872	0.911	0.977724	1.0845	1.35411	1.00319	1.05798	-0.772563
IMA4_HUMAN	1.07866	1.04466	1.0116	1.08246	0.964908	0.975611	0.932977	0.973981	1.17337	1.31177	1.15528	1.19302	0.992326	1.059	0.950478	0.960466	0.942124	0.972599	1.03425	1.08225	0.931581	1.06718	-0.556204
IMA5_HUMAN	1.00936	0.888953	0.85639	0.850452	0.884859	0.936189	0.978852	0.869928	1.08533	1.16147	0.971136	0.96508	1.41664	1.36736	1.11027	1.21046	1.13213	1.20955	1.0897	0.872046	1.08471	0.946331	-0.0118227
IMA7_HUMAN	0.974211	0.875174	0.8908	0.94573	0.979795	0.901338	1.08056	0.928101	1.03749	1.44298	1.09725	0.684156	1.00908	1.01595	0.96974	0.966868	0.98472	1.00927	0.946402	0.961876	0.991778	1.03887	0.0955188
IMB1_HUMAN	1.01849	0.91379	0.99655	0.959085	0.996113	0.967852	0.964097	0.944369	0.955935	0.991335	0.945604	0.958718	0.840667	0.761808	1.00085	1.01364	0.928129	1.00617	0.891789	0.788492	0.990659	0.913698	0.486984
IMDH2_HUMAN	0.912777	0.909529	0.904863	0.916168	0.992771	0.940713	0.992726	0.968712	0.96119	0.922649	0.938109	1.06817	1.08686	1.53833	0.940077	1.00478	0.876949	1.02096	0.840219	0.957808	0.991716	0.994551	-0.425669
IMP3_HUMAN	1.11317	1.19312	1.28981	0.945113	1.32623	1.19359	1.15635	1.1206	0.990014	0.900326	0.849435	0.901222	1.06905	1.23982	1.00138	0.948113	1.17856	0.894068	1.16496	0.934407	0.891953	1.15035	0.160818
IMPA1_HUMAN	1.00484	0.945308	0.999362	0.955661	0.958555	0.893557	0.985527	0.915995	0.830948	0.757069	0.964865	0.96569	0.730067	0.432535	0.888963	1.02311	0.772862	0.901804	0.738719	0.799191	0.865197	0.892233	0.384072
IN35_HUMAN	0.907366	0.885943	1.07188	0.926525	0.971383	1.04785	1.02212	0.933282	0.850663	1.28284	1.20524	1.23459	0.695258	0.558239	0.970989	0.900776	0.976551	0.951484	0.873473	1.15582	1.00737	0.79148	-0.230754
INF2_HUMAN	1.01192	1.02487	1.03087	1.01366	1.00513	1.00565	0.983592	0.953612	0.954268	0.953291	0.987345	1.00409	0.810908	0.636648	0.962623	0.941213	0.961574	0.961343	0.920768	0.722534	0.926728	0.880897	0.36875
INT1_HUMAN	0.92348	0.755231	0.773623	1.03687	0.91708	1.12175	0.848612	1.03921	0.664196	1.24086	0.87338	0.600268	1.47216	0.884293	1.31476	1.31421	2.06981	1.57961	1.86584	1.01619	1.10745	0.832736	0.281902
INT2_HUMAN	1.17465	0.983313	0.990617	0.98773	1.0685	1.00244	0.874716	0.964627	1.05685	1.13773	1.05198	1.03412	1.0541	0.834189	1.06953	1.12451	1.21451	1.28436	1.09201	0.734673	1.12672	0.83077	0.341522
INT3_HUMAN	1.06962	1.14314	1.04283	1.05477	0.968922	0.929988	0.967385	0.995536	0.823953	0.999361	0.929528	0.830373	0.880384	0.521068	0.992657	0.911269	1.15362	1.08345	1.05559	0.469743	0.919527	0.94627	0.556941
INT4_HUMAN	1.05011	1.08618	0.895169	1.05929	0.933065	1.02677	0.853108	0.880548	1.02879	1.43861	1.34023	0.935612	0.833009	0.784522	1.08179	0.971304	1.07475	0.95806	0.812568	0.695345	0.919398	0.985655	0.00945276
INT5_HUMAN	1.18604	1.08815	1.16104	1.0494	1.07327	1.1167	1.01475	0.999159	0.775527	0.995332	1.03604	1.05211	0.81756	0.661538	1.01233	1.02363	1.18284	1.05214	1.13389	0.66676	1.0259	0.967063	0.300597
IPO4_HUMAN	1.06147	0.927452	1.02444	0.966023	0.886247	0.80572	0.972297	0.876762	0.766016	1.04174	0.999018	1.04583	0.771925	0.830927	0.933464	0.907978	0.950424	1.10125	0.685959	0.494925	0.842121	0.7724	0.129771
IPO5_HUMAN	0.924461	0.897639	0.932665	0.904477	0.96406	0.899317	0.929416	0.892606	0.937694	0.942381	0.881073	0.88552	0.687751	0.560464	0.919676	1.00191	0.873167	1.00046	0.839356	0.723806	0.916581	0.835978	0.538943
IPO7_HUMAN	0.951177	0.886944	0.906887	0.889382	0.917691	0.808248	0.948596	0.86867	0.899065	1.02586	0.901359	0.92092	0.75296	0.747051	0.960572	1.01006	0.905312	1.04385	0.730715	0.661077	0.969581	0.823811	0.438458
IPO8_HUMAN	1.0293	0.7784	1.51553	0.866777	0.906405	0.829719	0.990173	0.889879	0.968283	1.30955	1.01188	0.971028	0.802512	0.923869	1.21113	1.01311	1.0826	1.42502	1.21535	0.803536	1.10257	0.870708	0.141779
IPO9_HUMAN	0.918679	0.789502	0.889645	0.846686	1.03102	0.84354	0.998882	0.880838	0.993808	1.14662	1.03689	1.0461	0.705501	0.571634	1.08564	1.02425	0.899604	1.02029	0.691124	0.655456	0.841245	0.686467	0.22801
IPYR_HUMAN	0.885434	0.9054	0.905311	0.899767	1.04552	1.04181	1.05905	1.05324	1.0016	1.09711	0.989484	0.955769	0.790963	0.600921	0.891941	0.893601	1.02806	1.15626	0.9167	1.37588	0.879708	0.933925	0.0981496
IPYR2_HUMAN	1.05414	1.13302	1.04635	1.11365	1.11355	1.35224	1.19565	1.21455	1.30923	1.27756	1.20935	1.32162	1.58269	2.21813	1.10423	1.01006	1.20208	1.07661	1.11261	1.35548	1.06969	1.15136	-0.577191
IQGA1_HUMAN	0.993402	0.964675	0.987966	0.957855	1.02829	0.968931	1.05392	0.978518	0.961015	0.918329	0.920896	0.889883	0.733482	0.596921	0.879163	0.94585	0.842948	0.921196	0.722873	0.695025	0.830425	0.88909	0.466253
IR3IP_HUMAN	0.883534	1.00323	0.882186	0.790993	0.858876	1.11859	1.18923	1.01924	0.724062	1.43058	0.934009	1.43196	1.48596	1.13893	1.24383	1.30103	6.10506	1.68176	4.57665	4.19374	2.15387	1.14026	-0.0169469
IRF5_HUMAN	0.887738	0.714159	0.730745	1.00723	0.966472	0.854485	0.879724	0.841836	0.946848	0.862281	1.09369	1.08343	0.999604	0.910254	0.997208	1.04882	0.883379	0.843827	0.483232	0.525788	0.9049	1.00753	-0.0137923
IRGQ_HUMAN	0.98875	0.929201	1.06472	1.03006	1.0354	0.776986	1.05024	1.04047	0.950186	0.788641	0.898421	1.08124	0.913207	0.514274	1.01585	0.903244	0.91278	0.944977	0.730621	0.86984	0.875574	1.01587	0.4144
ISOC2_HUMAN	1.09907	1.0573	0.942725	1.03358	1.08056	1.22713	1.17116	1.21473	1.28292	1.62558	1.38831	1.43482	1.60666	2.27892	1.12356	1.01607	1.32774	1.18541	1.27537	1.49427	1.04119	1.08476	-0.655627
IST1_HUMAN	1.03743	1.00886	1.10501	0.978257	0.943074	0.881577	0.917814	0.887445	1.02327	0.927867	1.14001	1.02107	0.727048	0.788408	0.921252	1.00208	0.887912	1.08787	0.806969	0.886735	0.95045	0.909513	0.0759736
ITA5_HUMAN	1.0701	1.0748	1.09391	1.10403	1.1218	1.16504	1.06941	1.09032	1.06014	0.995906	1.01801	0.97034	1.02468	0.80858	1.02903	0.998262	1.02974	0.948609	1.09124	0.82562	0.95137	1.00003	0.383741
ITAL_HUMAN	1.06205	1.12589	0.961744	1.09075	1.07243	1.09736	1.03417	1.11135	1.19538	1.00663	1.08121	1.22904	1.09384	0.89073	1.05724	1.07583	1.05059	1.06103	1.16046	1.01304	1.11599	1.11339	-0.00589302
ITAM_HUMAN	1.10489	1.07457	1.14711	1.09394	1.11332	1.10662	1.07091	1.08309	1.0912	0.903224	1.00652	1.01923	1.03302	0.83568	1.0324	0.981172	1.08458	0.995885	1.14294	0.859783	1.02553	1.07673	0.405846
ITAV_HUMAN	1.0566	1.04337	1.16218	1.14195	1.1429	1.17248	1.17004	1.0447	1.19832	1.09635	1.14536	1.1491	1.03053	0.870426	0.948427	0.939012	0.978792	0.966676	1.01437	0.761323	0.969582	1.02378	-0.03604
ITAX_HUMAN	1.07332	1.05064	1.05972	1.0357	1.13413	1.14164	1.07167	1.11658	1.05769	0.922432	0.977547	0.991958	1.02237	0.844171	0.963622	0.91692	1.04634	0.993979	1.10874	0.852453	0.953323	0.993221	0.315382
ITB1_HUMAN	1.13052	1.14566	1.20021	1.17214	1.09495	1.1845	1.10924	1.14387	1.15683	0.902313	0.831367	0.828042	1.01311	0.910041	0.99194	0.927813	1.04335	0.95888	1.04059	0.790353	1.03152	1.01699	0.552088
ITB2_HUMAN	1.08494	1.10881	1.09835	1.11686	1.03134	1.10293	1.03459	1.05391	1.09889	0.871571	0.86674	0.833661	1.12794	1.15131	1.02945	0.975387	1.03277	0.877739	1.03927	0.76986	0.967518	1.07011	0.341478
ITB5_HUMAN	1.09649	1.09572	1.09883	1.12588	1.16438	1.16307	1.23426	1.16356	1.11356	1.06128	1.13282	1.17093	1.0409	0.838879	1.05083	0.975986	1.06371	0.944836	0.893098	0.594849	0.893849	0.917927	0.139785
ITB7_HUMAN	0.866856	0.945255	0.916244	0.988793	1.12788	1.3598	1.00322	1.05366	0.971362	0.833266	1.08696	0.986968	0.932907	0.794571	1.06044	0.961232	1.14241	0.893569	0.740895	0.458663	1.031	1.04279	0.210942
ITPA_HUMAN	0.93727	0.874302	0.800112	1.01399	1.06074	1.31182	1.50436	1.29946	0.975436	1.00768	0.823785	1.22988	0.749881	0.557213	0.807045	1.08375	0.562039	0.847217	0.620797	0.854336	0.731434	0.755126	0.0584026
ITPR1_HUMAN	1.18921	1.27163	0.806093	1.10245	0.992849	1.12357	0.971529	0.942514	1.14744	0.617334	0.882147	1.07765	1.09934	1.06471	1.08014	1.04011	1.09401	0.927443	1.00812	0.616323	0.872945	0.933806	0.23602
IVD_HUMAN	1.18164	1.24255	1.05419	1.13818	1.12416	1.24373	1.19822	1.14591	1.37687	1.20936	1.20148	1.31127	1.44495	1.83136	1.08895	1.03101	1.1341	0.986181	1.11898	1.13675	1.14089	1.25588	-0.531896
IWS1_HUMAN	1.02944	1.07389	1.05922	1.02978	0.905982	0.953521	0.913835	1.014	0.974218	0.913047	0.849496	1.06526	0.967356	1.03786	1.02983	0.830401	1.1437	1.08946	1.27809	1.09792	0.980161	1.04732	-0.0481277
JIP4_HUMAN	0.933146	0.833484	0.715485	0.844388	1.03618	0.955377	1.0037	0.999677	1.05127	0.89013	0.974363	0.937324	0.96456	0.843399	1.12194	1.13628	0.940964	1.04189	0.92053	0.61722	0.937532	0.805669	0.369018
K2013_HUMAN	1.26205	1.06864	0.734043	1.12041	1.02504	0.956339	1.00974	0.883419	0.874635	0.797987	1.09139	1.02022	1.32601	1.49457	1.17066	0.94987	1.08077	1.02426	0.985552	0.97932	1.21384	1.24965	-0.155668
KAD1_HUMAN	1.06125	0.95534	1.03643	0.980853	1.03519	0.804261	1.07904	0.917873	1.01582	1.00775	1.07352	1.08394	0.671816	0.590731	0.811659	0.937894	0.840177	0.962696	0.663558	0.770715	0.82107	0.834986	0.138494
KAD2_HUMAN	1.03612	1.04769	1.06625	1.03384	1.01391	1.07295	0.963689	1.05677	1.06548	0.963579	1.08247	1.03436	1.39649	1.5694	1.03032	0.95165	1.08715	1.02929	1.23616	1.27299	1.14168	1.12698	-0.452291
KAD3_HUMAN	1.19114	1.19907	1.05728	1.26512	1.08736	1.16336	1.06319	1.11483	1.21792	1.07848	1.2504	1.49068	1.44101	2.24869	1.0683	1.02415	1.19464	0.946714	1.14483	1.39054	1.10477	1.04808	-0.657572
KANK2_HUMAN	0.817341	0.904986	0.963663	1.05893	0.956252	0.93374	0.849436	0.870094	1.05693	0.788231	1.0497	0.992641	0.906766	1.09886	0.995273	1.04633	0.895794	0.83069	0.911011	1.00395	0.927297	0.913308	-0.330812
KAP0_HUMAN	0.979377	0.951105	1.00429	1.01358	0.982472	0.964372	0.937341	0.987669	0.901106	0.811554	0.834274	0.947864	0.840876	0.892075	0.922337	1.00089	0.934048	0.951193	1.03397	1.30066	0.998742	0.960161	0.0653695
KAP2_HUMAN	1.02046	0.94556	1.02357	0.97199	1.03748	1.01435	1.01785	1.04017	0.963584	1.02716	1.08882	0.990826	1.03774	1.00301	0.919443	0.935532	0.987258	0.981651	0.942383	1.12478	0.923081	0.9364	-0.414323
KAPCA_HUMAN	1.25652	1.09968	1.11072	1.05128	0.923526	0.935857	0.973673	0.964746	0.732501	0.740281	0.889901	0.736855	0.580441	0.364053	0.86588	0.994547	0.943456	0.952714	0.899486	0.573146	0.824697	0.771437	0.541315
KCAB2_HUMAN	0.991266	0.987843	0.883197	0.93482	0.969014	0.863242	0.981465	0.979008	0.935903	1.06067	0.821189	0.933895	1.13351	1.79408	0.970787	1.07115	0.925856	1.00993	0.796189	0.83324	0.863918	0.912661	-0.219622
KCC1A_HUMAN	0.870267	0.887209	0.855467	0.886272	1.06735	0.92046	1.05265	0.953242	0.991545	0.949091	0.930823	0.792919	0.809692	0.769145	0.903083	1.01429	0.838237	1.00651	0.601533	0.632982	0.878712	0.896923	0.482291
KCC2D_HUMAN	0.87926	0.82732	0.858979	0.890857	0.952441	0.924573	1.00138	0.969294	0.976334	0.925099	0.983733	1.15376	0.951379	1.05862	0.89526	0.936914	0.959966	1.06547	0.959395	1.20886	0.923689	0.984204	-0.530286
KCD12_HUMAN	0.915157	0.946303	0.884165	0.844058	0.997975	0.923618	0.964838	0.934572	1.0249	0.753376	0.922228	0.843993	0.58841	0.329885	0.974658	0.956089	0.939903	0.940396	0.687091	0.624711	0.948575	0.924121	0.583989
KCMF1_HUMAN	0.974924	0.910889	1.18367	0.912763	1.18295	1.02321	1.31849	0.892808	0.95267	1.14547	0.922192	0.91115	1.06164	1.16996	1.08498	1.05772	1.55567	1.61958	1.32106	1.48386	0.980505	0.880902	0.121502
KCNN4_HUMAN	1.18598	1.33261	1.01136	0.696793	0.584993	0.79351	0.642411	0.471478	0.702869	0.859884	1.04665	1.25158	1.2256	1.40775	1.21675	1.0278	1.27621	1.0517	1.65744	1.02926	0.812731	0.923351	-0.262435
KCY_HUMAN	1.0067	0.92454	0.939526	0.959716	0.979606	1.01616	0.972239	0.972758	1.00201	1.02388	0.929034	1.07984	0.753489	0.520771	0.939662	1.00141	0.87214	1.05977	0.824518	0.85106	0.867699	0.847111	0.295072
KDIS_HUMAN	1.08307	1.16046	1.16333	1.09742	1.21541	1.35053	1.34822	1.2268	1.15479	0.921729	1.06284	0.839307	1.03149	0.98771	0.976611	0.99289	1.18389	1.11742	0.909551	0.772073	0.799282	0.856253	0.341216
KDM1A_HUMAN	0.918369	0.861387	0.676214	0.82823	1.05245	1.08194	0.916093	1.02597	0.975332	0.898532	1.01968	1.01803	0.94783	1.26403	1.20666	1.08103	1.25893	1.06644	1.12062	1.07844	1.18674	1.11936	-0.113396
KDM3B_HUMAN	0.879887	1.0423	1.10468	0.918549	0.97522	0.827571	1.04736	1.01044	0.892935	0.855386	1.12007	0.619228	0.860214	0.864244	0.874364	1.05745	0.973128	0.933768	1.13492	1.05961	0.756592	0.86702	0.229387
KHDR1_HUMAN	0.910107	0.974758	1.02135	1.0016	1.09088	1.13455	1.09065	1.11568	1.04734	1.077	1.00246	1.11899	1.16574	1.07922	0.936316	0.925339	0.954912	0.970946	1.35934	1.21863	0.933627	1.02185	-0.463237
KINH_HUMAN	0.947287	0.960351	0.943127	0.92013	0.959299	0.954101	0.953648	0.894005	0.866452	0.834378	0.981483	0.977768	0.892516	0.913824	0.952712	0.999987	0.881294	1.00638	0.674099	0.497373	0.95217	0.93967	0.225741
KISHA_HUMAN	1.14	1.41931	0.880553	1.05815	0.918551	0.918727	1.24017	1.06645	1.31821	1.08624	0.86723	1.11191	1.30062	1.00799	1.25906	1.15536	1.56917	1.25311	1.34623	1.5057	0.947535	1.11188	0.282715
KLC1_HUMAN	0.913072	0.920583	0.994737	0.94928	0.887396	0.928006	1.09801	0.963051	0.754838	1.28068	1.09519	1.11738	0.998284	1.06168	1.00159	0.948508	0.973446	1.04036	0.908271	1.06569	0.984778	0.884092	-0.452515
KPCD_HUMAN	0.918621	0.776177	0.782087	0.815843	0.92001	0.974925	0.964691	0.85887	0.888139	0.758039	0.802464	1.04558	0.922834	0.846719	0.997454	1.02038	0.78148	0.961582	0.682162	0.57687	0.928038	1.18618	0.212326
KPYM_HUMAN	0.910337	0.944942	0.8943	0.902668	0.929262	0.908493	0.994267	0.926552	0.947594	0.888798	0.904714	0.973558	0.766279	0.617789	0.916449	0.993851	0.828535	0.982132	0.767494	0.741143	0.876094	0.870042	0.441398
KRI1_HUMAN	1.05837	1.23272	0.905661	0.99609	0.921436	1.06625	0.920617	1.0133	0.990001	0.93608	0.935677	0.905433	1.09853	1.00759	0.846786	1.01729	1.02037	0.899601	0.992693	0.639154	1.06115	1.14633	0.24555
KS6A1_HUMAN	0.997301	0.960542	0.969346	0.994988	1.04156	0.904025	0.977199	0.956477	1.03933	0.882861	0.868071	1.00444	0.747054	0.757904	0.932314	1.01356	0.849995	0.930598	0.620914	0.64113	1.04829	0.988979	0.407223
KTHY_HUMAN	0.972784	0.923156	1.0084	1.06462	1.1192	1.07292	1.08828	1.09401	1.03134	0.76391	1.00268	0.852367	0.918569	1.00656	0.888277	0.846139	0.866129	0.880141	0.806473	1.09026	0.94741	0.865404	0.00113987
KTN1_HUMAN	1.12783	1.23951	1.16961	1.1522	1.17704	1.30726	1.17954	1.19389	1.27646	1.0535	1.17915	1.24821	1.05774	0.677191	1.12724	1.08024	1.08409	0.929663	1.17064	0.922031	0.955398	1.14948	0.144669
KYNU_HUMAN	1.04372	0.932831	1.12102	0.918093	1.18075	1.02471	0.933175	0.994823	0.924257	0.954973	0.927705	1.03138	0.738743	0.56333	0.757413	0.999127	0.743703	0.983029	1.09534	0.721326	0.793331	0.79119	0.137419
LA_HUMAN	0.943565	1.03766	0.972584	1.01331	0.930365	0.955362	0.997087	0.910738	0.94345	0.99806	1.00941	1.10797	0.898642	0.775407	0.985317	0.974387	0.992427	0.951841	0.932516	1.11504	0.90983	0.998558	-0.0676712
LACB2_HUMAN	1.02498	1.07013	0.96288	0.936498	1.04524	1.05861	1.07168	1.03738	1.18509	1.15432	1.15914	1.36485	1.05275	0.965551	0.956824	0.988043	0.891416	0.976026	0.905625	1.00094	0.939626	1.06491	-0.480446
LACTB_HUMAN	1.04351	1.17994	0.993538	1.10643	1.04141	1.06347	0.952558	1.01263	0.942067	0.944464	0.885558	0.832939	1.09113	1.10895	1.0234	0.973363	1.05089	1.01457	1.09312	0.823812	0.965753	1.07751	0.36212
LAMP1_HUMAN	1.04143	1.07565	0.9427	1.10971	1.00097	0.983797	0.980514	0.924957	1.18754	1.22244	1.414	1.60862	1.59239	2.52624	1.05756	1.08364	1.20133	1.0978	1.21781	1.27233	1.12588	1.14142	-0.680181
LAMP2_HUMAN	0.978896	1.02784	0.903927	0.996028	0.925075	1.03719	1.01147	0.938231	1.1636	1.09076	0.916279	1.22139	1.40507	2.33821	1.01392	1.04176	1.13915	1.16068	1.17987	1.38268	0.936584	1.04229	-0.482811
LAP2A_HUMAN	1.12614	1.11929	1.10262	1.16075	1.05906	1.14745	1.09466	1.14597	1.2754	1.03072	1.23023	1.03254	1.03429	1.03368	1.0038	0.966308	1.05335	0.884741	1.03618	0.938357	0.856696	0.99517	-0.128657
LAP2B_HUMAN	1.46125	1.62833	1.57637	1.45867	1.1251	1.35683	1.2463	1.26298	1.42338	1.10278	1.09303	1.13576	1.09246	1.11778	0.991015	0.909663	0.988785	0.915551	0.914684	0.779892	0.824169	1.03677	0.0935414
LAR4B_HUMAN	1.19693	0.923477	1.03989	1.24191	1.02097	1.00526	0.802058	0.974846	0.854755	0.701165	0.87274	0.733701	0.914455	1.15539	1.04305	1.18949	0.876563	1.14378	1.04631	0.894538	1.01386	0.943089	0.288853
LARP1_HUMAN	1.14742	1.0225	1.09031	1.05962	1.0297	0.930179	1.02359	0.946545	0.941065	1.21329	1.11742	1.05466	0.908972	1.01537	1.05473	1.01533	0.987493	0.970044	0.980421	1.03141	0.993715	0.96648	-0.228561
LASP1_HUMAN	0.931038	0.830259	1.03656	0.955612	0.991611	1.02756	0.971641	1.0358	1.03536	1.08459	0.980212	0.93449	0.728558	0.516914	0.895886	0.963327	0.780471	0.933096	0.803219	0.756978	0.955145	0.868857	0.281093
LAT1_HUMAN	1.17366	1.18293	1.29147	1.47148	1.17817	1.18501	1.12709	1.16946	1.11002	1.07715	0.972138	0.764153	1.16942	0.845226	0.98488	0.979497	0.799853	0.886446	0.951472	0.639184	0.859222	1.01844	0.348213
LBR_HUMAN	1.20581	1.21916	1.10939	1.06667	1.14121	1.17247	1.07633	1.13079	1.19826	1.0982	1.11019	1.1921	1.08132	0.8845	1.05359	1.03639	1.00871	0.845329	1.1098	0.762282	0.816602	0.958222	0.0200911
LC7L2_HUMAN	0.992825	1.02287	1.08286	1.11723	1.09944	1.05401	1.02902	1.1519	1.13494	1.15463	1.21017	0.960144	1.20792	1.08279	0.913122	0.944847	0.906562	0.734932	1.41267	1.64589	1.04213	0.931458	-0.389036
LC7L3_HUMAN	0.904043	0.821323	0.992273	0.934572	0.979116	1.14544	0.9852	1.16063	0.891502	0.863963	0.80591	0.794288	1.11047	0.993532	0.933024	0.805779	1.0414	0.965884	1.40845	1.4315	1.08238	1.15515	-0.0440572
LCAP_HUMAN	1.03149	1.02532	1.04683	0.878107	0.980487	0.72381	1.00873	0.854353	0.720041	0.697534	0.826272	0.848992	1.002	1.25667	0.889455	0.859592	1.13049	1.04466	1.20402	0.865878	0.946198	1.03391	0.0489851
LCP2_HUMAN	0.942363	1.26716	1.02804	1.00515	0.745751	0.863412	0.858625	0.930271	0.917366	1.36118	1.28073	1.68404	1.51225	0.827612	1.0968	1.15216	1.13033	1.14748	0.84701	1.35936	0.970417	0.881546	-0.328318
LDHA_HUMAN	0.934541	0.899415	0.894882	0.882022	0.953151	0.873529	0.888133	0.918657	0.814048	0.781982	0.749204	0.67317	0.66149	0.38296	0.946481	1.02937	0.869169	1.02682	0.687394	0.547272	0.924114	0.838958	0.773452
LDHB_HUMAN	0.938558	0.900112	0.959398	0.952548	0.992704	0.936631	1.01046	0.966562	0.962333	0.929861	0.91756	0.769243	0.7546	0.416345	0.930394	1.01845	0.883983	0.973196	0.758967	0.649851	1.01447	0.862551	0.651464
LEG1_HUMAN	0.962952	0.946706	1.01338	1.0112	1.03615	1.06929	0.99666	0.984957	1.0315	0.932969	0.816097	0.744344	0.771569	0.371306	1.00082	0.992405	0.95053	0.963018	1.00779	0.653064	1.08245	1.07789	0.673419
LEG3_HUMAN	0.913369	0.949045	1.0295	1.0271	1.01409	0.951537	1.02784	0.98112	1.08437	1.03927	1.18607	1.07427	0.769488	0.597303	0.888541	1.01306	0.914373	0.958644	0.906625	0.979193	1.07386	0.918096	0.034361
LEG9_HUMAN	0.961272	0.935563	1.07205	1.10131	1.04945	1.09069	1.02375	1.01835	0.937445	0.906241	0.934749	0.868956	0.849758	0.631328	1.00831	0.898309	0.992818	0.953881	1.03021	0.984167	1.18241	1.15244	0.421533
LEMD2_HUMAN	1.29179	1.41346	1.19565	1.07087	1.07456	1.14525	1.20512	1.03598	1.24335	0.921385	1.1672	1.167	1.008	1.0341	0.978871	0.899125	1.35969	0.935595	1.22151	1.03056	1.41674	1.09985	0.0485147
LETM1_HUMAN	1.12056	1.24115	0.938646	1.02386	1.11512	1.14632	1.18495	1.12676	1.21744	0.961707	0.854714	0.708879	1.14126	1.16284	1.11267	0.936822	1.02529	0.903276	0.865953	0.572683	1.07827	1.16952	0.471106
LEUK_HUMAN	1.00184	1.08433	1.05685	1.20368	1.10167	1.16682	0.988277	0.971196	0.885081	0.944494	1.15079	1.07452	1.08287	0.77451	1.08874	1.03488	1.11423	1.02251	1.1782	0.723807	1.17473	1.13305	0.166119
LGUL_HUMAN	0.952543	0.895323	0.96102	0.966258	0.993661	0.885713	0.985851	0.935922	0.942358	0.869568	0.811753	0.831204	0.724443	0.452902	0.893136	0.976388	0.81641	0.954961	0.708765	0.85464	0.869625	0.831531	0.618265
LICH_HUMAN	1.10181	1.11707	0.972802	1.25346	1.08421	1.28512	0.947719	1.05172	0.835513	0.743132	0.558473	0.711958	1.07372	1.08503	1.02769	0.964528	1.22504	1.19755	0.851848	0.8518	1.12787	1.037	0.529442
LIMS1_HUMAN	0.888316	0.840424	0.935616	0.894017	0.945822	0.999932	0.996923	0.925971	1.18443	1.1615	1.00306	0.891734	0.863238	0.729078	0.940248	1.01358	0.815775	0.993013	0.813106	0.911298	0.952555	0.921453	0.218136
LIPB1_HUMAN	1.04327	1.02143	0.91479	0.975093	1.02491	1.05844	1.03732	1.01272	1.05324	0.961178	0.923874	0.948259	0.813049	0.936616	0.857266	0.995611	0.88218	0.875443	0.730896	0.919793	0.852882	0.890695	0.138928
LIPL_HUMAN	1.03479	1.07887	0.99266	1.21354	1.03262	1.15768	1.19006	1.26132	1.02879	0.825233	1.00917	1.14699	0.609982	0.544636	1.15136	1.0866	1.19661	1.13485	1.19424	0.948067	0.97515	1.16461	0.322456
LKHA4_HUMAN	0.96019	0.915711	0.952907	0.929125	0.922136	0.860537	0.971572	0.876505	0.84871	0.835003	0.8474	0.906349	0.563386	0.217023	0.90316	0.950079	0.925658	1.02581	0.763505	0.480714	0.969995	0.855844	0.545878
LMA2L_HUMAN	0.975612	0.995679	1.24637	0.980368	1.04426	1.03316	1.01492	1.06337	1.06242	0.968322	1.28776	1.22999	0.978637	1.16869	0.846432	0.835996	1.06132	0.839253	1.12578	1.10156	1.16986	1.29468	-0.628693
LMAN1_HUMAN	1.05411	1.17031	1.18045	1.04085	1.02203	1.13169	1.04898	1.0846	1.06735	0.862397	0.897453	0.951654	1.13975	1.29166	1.00693	0.937477	1.09262	0.911701	1.01564	0.851255	0.944023	1.12412	0.057097
LMAN2_HUMAN	1.0272	1.12252	0.981983	1.00613	0.978699	1.02577	1.09056	0.983528	1.0697	0.885698	1.00874	0.982761	1.17961	1.25812	1.04392	0.968818	1.03657	0.869245	0.970083	0.745333	0.976829	1.05409	-0.0191443
LMNA_HUMAN	0.932708	0.994569	1.02628	1.06944	1.07771	1.1641	0.957732	1.02709	1.05041	0.971744	0.982724	0.958709	1.19625	1.51979	0.997286	0.951652	1.01426	0.942656	1.19873	1.15556	1.18297	1.15009	-0.406284
LMNB1_HUMAN	1.00976	1.03464	1.03672	1.05337	1.0414	1.16452	0.960175	1.10943	1.08157	1.01488	1.0751	1.14282	1.47369	1.98991	1.04482	0.983518	0.999531	0.931357	1.24415	1.51596	1.22698	1.18182	-0.553141
LMNB2_HUMAN	1.01734	1.04813	1.07795	1.05928	1.02971	1.13606	0.926646	1.07116	1.10548	1.00183	1.12158	1.2097	1.48633	2.02064	1.03228	0.995777	1	0.96398	1.22312	1.47758	1.1723	1.24308	-0.591641
LONM_HUMAN	1.14579	1.21499	1.11426	1.15337	1.09937	1.17083	1.09031	1.07863	1.50547	1.44528	1.32715	1.30363	1.38483	1.63891	1.11329	1.00973	1.22682	1.06954	1.16993	1.05298	1.09316	1.19843	-0.523919
LPP_HUMAN	1.02334	1.29485	1.04279	1.12781	1.10058	0.954347	1.24726	1.08724	1.03066	1.5339	1.03706	0.97896	0.987841	0.894941	0.997897	1.17133	1.13759	1.146	0.99115	1.21921	0.842457	0.735665	0.158877
LPPRC_HUMAN	1.17555	1.20709	1.10171	1.11499	1.09244	1.17887	1.1452	1.12318	1.36277	1.2547	1.1342	1.0359	1.11371	1.08123	1.12455	1.02407	1.17462	0.992534	1.003	0.581324	1.08965	1.1728	0.221308
LPXN_HUMAN	1.4402	0.82986	1.03863	0.985368	0.993823	1.06679	1.06312	0.96884	1.98375	1.30677	1.22542	1.3161	0.764325	0.85316	0.921614	0.900389	0.755753	0.913393	0.817206	0.980028	1.03311	0.832043	-0.122808
LRC47_HUMAN	0.951774	1.05158	0.942742	0.821202	0.976636	0.787538	0.982396	0.929245	0.876878	0.594222	0.697242	0.716535	0.74368	0.476308	0.953554	1.00154	0.924053	0.969801	0.86918	0.911902	0.957861	1.00645	0.774374
LRC59_HUMAN	1.0907	1.1594	1.07838	0.990145	1.06523	1.18295	1.11665	1.00591	1.27892	0.922186	0.989608	1.03593	1.00382	1.01567	1.03953	0.98126	1.02499	0.821209	1.03073	0.732979	0.883175	0.969797	0.149403
LRC8A_HUMAN	1.13933	1.12979	1.23952	1.36634	1.03259	0.996568	0.905804	0.991629	1.19063	1.20328	1.14544	1.06398	0.911272	0.780247	0.848869	0.768066	0.997724	0.902254	0.777999	0.623568	0.907781	0.944707	0.0384559
LRC8C_HUMAN	1.11004	1.12016	0.897509	1.02935	1.23455	1.209	1.11954	1.01706	1.12577	1.19061	0.963755	0.992991	1.0202	0.99389	1.00364	0.97951	1.06989	0.835064	1.01846	0.59164	0.978107	1.03778	0.186602
LRCH4_HUMAN	1.21024	1.20178	1.53168	1.21483	1.12879	1.18989	1.15364	1.09649	0.916616	0.855348	0.836395	0.99234	1.07297	1.02443	0.979123	0.841048	1.44396	1.27023	1.07253	0.855578	0.899538	0.952448	0.305245
LRP1_HUMAN	1.13017	0.967287	0.972847	1.15637	0.897952	0.899184	0.934554	0.982079	0.879819	0.624067	0.870379	0.816966	0.854003	0.784487	0.986253	0.98957	1.1333	0.996433	0.863303	0.756455	0.990523	1.17809	0.564562
LRRF1_HUMAN	0.952411	0.972567	1.10955	1.00191	1.00992	1.05236	0.977986	1.13431	0.888889	0.886119	0.778792	0.604019	1.02927	0.893297	0.921837	1.02895	0.872825	0.93511	0.888077	1.12494	1.20231	0.897509	0.498619
LSM2_HUMAN	1.08056	1.05713	0.850562	0.997172	1.02145	1.06813	1.07811	1.06484	0.995117	0.861947	1.02961	1.17681	0.860588	0.488092	0.993234	0.944252	1.00495	1.00881	0.958424	0.9899	0.991784	1.0425	0.231882
LSM3_HUMAN	0.97073	0.83534	0.781519	0.927182	1.00477	0.953057	0.936484	0.903445	0.970294	0.873838	0.997335	1.01554	0.872843	0.572709	1.01471	1.02863	1.07989	1.05398	1.0869	1.28555	1.13669	1.09872	0.176895
LSM4_HUMAN	0.946787	0.932982	0.900693	0.910642	0.87369	1.03853	0.977201	1.02914	0.980499	0.489251	0.59212	0.673031	0.742154	0.543826	0.949913	0.929698	0.942267	0.904241	0.976597	0.794685	1.03081	1.01711	0.699835
LSM5_HUMAN	1.03337	1.05989	1.09136	1.08063	1.13233	1.15488	1.09353	1.31224	1.21236	1.20584	1.15965	0.998544	0.728615	0.680896	1.04983	0.970187	1.10437	1.06928	1.30304	1.3472	1.46038	0.97993	0.0970783
LSM6_HUMAN	0.937224	0.906803	1.0551	0.956324	1.0761	1.1649	0.893916	1.06137	0.984594	0.906852	0.979669	0.76677	0.807844	0.500406	1.08513	1.02876	0.956584	0.960061	0.98656	1.10044	0.952683	1.15949	0.448302
LSM8_HUMAN	1.03726	1.07735	1.09114	1.0168	0.987669	1.11326	1.02821	1.10699	0.961882	1.1761	1.01293	1.00078	0.870284	0.645974	0.675407	1.10126	0.917557	0.944027	0.959582	1.15459	0.673158	1.02338	0.0165599
LSP1_HUMAN	1.0019	1.23632	0.855795	0.949295	0.998696	1.12771	0.966644	1.07818	0.892185	0.545422	0.661243	0.500949	0.660959	0.340876	0.920078	0.949757	0.950141	0.932709	0.813789	0.400443	0.888388	0.928954	0.740132
LTOR1_HUMAN	1.03812	1.09256	1.0143	0.979276	1.03438	1.09404	1.09304	0.912484	1.20239	1.11362	1.06793	1.24124	1.3001	1.66421	1.00016	0.962993	1.07213	1.02604	1.22402	1.12231	0.962165	1.04538	-0.596235
LTOR2_HUMAN	1.07067	1.02423	0.922485	0.989374	1.13605	1.23264	1.0017	1.05659	1.16512	1.17073	1.04402	1.31996	1.37595	1.6981	1.00617	1.03388	1.05352	1.02307	1.2942	1.6924	0.952998	1.07024	-0.618066
LTOR3_HUMAN	0.93809	1.22816	0.925486	0.953149	1.0499	1.05963	1.04272	0.943618	1.23082	1.50974	1.41124	1.73746	1.39606	1.75961	1.09937	1.15044	1.10852	1.07757	1.37074	1.71044	0.876636	1.04885	-0.757901
LTOR5_HUMAN	0.83782	1.18384	0.950006	0.983682	1.24951	1.26729	1.10222	1.084	1.38558	1.09938	0.924116	1.06053	1.15569	1.53514	0.854656	0.97981	0.786464	0.92918	1.08684	1.40908	0.800406	0.89891	-0.382657
LYAG_HUMAN	0.995767	0.955962	1.00643	1.00616	0.956734	0.971019	0.95928	0.99527	1.0421	0.944881	1.06443	1.19813	1.2935	1.54171	1.06756	1.07172	1.07092	1.02953	1.2034	1.44937	1.01041	1.07787	-0.555457
LYAR_HUMAN	1.30555	1.49321	1.48029	1.26224	1.1591	1.39899	1.10131	1.21768	1.0396	0.7772	0.881872	0.90319	1.15219	0.805591	1.02007	1.00693	0.964436	0.72448	0.82198	0.546337	1.00355	0.996207	0.373854
LYN_HUMAN	1.1113	1.1652	1.14492	1.11881	1.0637	1.10539	1.07149	0.937501	1.23076	1.0011	1.00414	0.969937	0.962644	0.647912	0.975161	0.946333	1.02324	0.966383	0.932863	0.649853	0.986762	1.00446	0.46064
LYPA1_HUMAN	1.08851	0.979401	1.039	1.06206	1.05928	0.98304	1.05159	1.03101	1.09387	1.09187	0.990803	1.03038	0.826937	0.744827	0.952521	0.98522	0.869163	0.942436	0.734086	0.914687	0.960977	0.946298	0.249354
LYPA2_HUMAN	0.900494	0.960745	1.05815	1.08427	1.1108	1.16475	1.10045	1.00458	1.02638	0.952534	1.09472	1.22935	0.672179	0.632514	0.870451	0.895341	0.938967	1.01699	0.878898	1.23633	0.766317	0.886648	-0.173464
LYPL1_HUMAN	1.14486	0.938959	1.07975	1.13584	0.996428	0.919983	0.873328	0.979687	1.01039	1.03389	1.17098	1.05285	0.921186	0.911346	0.95499	0.999116	0.93473	1.02217	0.766076	0.695743	0.93321	0.938316	-0.00177179
LYRIC_HUMAN	1.09694	1.10988	1.0785	1.11713	1.02588	1.15736	1.02583	1.07539	1.07724	0.844569	0.859541	0.963004	0.950315	0.710765	0.980421	0.948255	1.00897	0.846653	0.988992	0.683478	0.895481	1.0175	0.46324
M2OM_HUMAN	1.13323	1.114	0.982543	1.05487	1.02969	1.09307	1.085	0.989934	1.22664	1.1073	0.999579	1.00903	1.21805	1.31111	1.15933	1.0744	1.14439	0.977536	0.955267	0.603005	1.12321	1.1658	0.154086
M4K4_HUMAN	0.900563	0.935266	0.883	0.817715	1.14713	1.09318	1.13126	1.07111	0.935993	1.09527	0.85979	0.921222	0.96947	0.825595	0.995191	1.02513	0.958853	0.949845	0.919307	0.730887	0.934737	0.965036	0.389971
MA2A1_HUMAN	1.0589	1.06418	0.996312	0.938096	0.9233	0.959382	1.04003	0.939837	1.09996	1.16934	0.960486	0.959394	1.15752	1.42818	1.01657	0.969107	1.36964	1.24829	1.19038	0.96999	0.842505	0.914308	-0.0841734
MA2B1_HUMAN	0.986931	0.996231	0.914884	0.959747	0.892073	0.948305	0.943093	0.940697	0.809439	0.799739	1.00119	1.0679	1.19105	1.49591	1.0783	1.03166	1.02671	0.979251	1.14838	1.23266	1.03503	1.06828	-0.431383
MA7D1_HUMAN	1.24718	1.15491	1.36396	1.30209	1.01412	1.04522	1.20228	1.09306	1.395	1.45117	1.45445	1.51858	0.854871	0.716597	0.93127	1.07748	0.993119	0.938873	0.797413	0.653726	0.864101	0.57461	-0.142832
MACF1_HUMAN	1.16664	1.05471	0.935963	1.04048	0.937066	0.964747	0.889081	0.903818	0.966481	0.642639	0.661137	0.855312	1.03794	0.748959	1.1244	1.09147	1.07898	1.13291	1.12566	0.988767	1.11086	1.06272	0.661364
MAGT1_HUMAN	1.10817	1.03727	0.974295	0.987253	0.982917	1.03907	0.925209	0.950998	0.972369	0.797879	0.910476	0.985473	1.07937	1.29059	1.01139	0.956557	1.1268	0.924348	1.11653	0.792265	1.03065	1.01933	-0.0568038
MAK16_HUMAN	1.08716	1.09677	0.953883	0.955696	0.933298	0.951986	0.833291	1.04666	0.907659	0.973718	1.07569	1.04632	1.39568	1.32183	1.08592	1.03505	1.04685	0.978304	1.03632	1.0446	1.05986	1.17758	-0.261867
MANF_HUMAN	0.925956	0.977011	1.00045	1.01224	1.06256	1.07999	0.983057	1.07	0.87343	0.71502	0.920134	0.843029	1.32	1.71559	1.06241	1.00271	1.08879	0.940134	1.27608	1.38713	1.16664	1.14081	-0.252768
MAOM_HUMAN	1.17723	1.24881	1.16107	1.18132	1.19144	1.26288	1.1655	1.18208	1.46557	1.46536	1.32339	1.45369	1.64369	2.35894	1.09835	1.02522	1.20573	1.00387	1.19861	1.15063	1.01251	1.20844	-0.593972
MAOX_HUMAN	0.902744	0.91971	1.01962	0.988452	1.01191	0.950347	0.939847	1.03919	0.978735	1.00986	0.909283	0.965767	0.790006	0.481398	0.976816	0.912014	0.91371	1.05859	1.07384	0.827379	0.991345	0.842315	0.393747
MAP11_HUMAN	0.965441	1.09536	0.961385	0.998525	1.16774	1.24643	1.27641	1.20397	1.29443	1.16802	0.837975	0.766163	0.826142	0.517016	1.01749	1.07492	0.981229	1.03384	0.974506	1.04359	1.07475	1.01638	0.583539
MAP1S_HUMAN	1.11657	1.13476	0.924781	1.03941	0.987512	0.961959	0.967046	0.949765	0.948274	1.01486	0.961915	1.00342	0.856624	0.980565	0.987713	1.00224	0.954285	1.02885	0.671258	0.753672	0.901238	0.891601	0.233322
MAP2_HUMAN	1.46488	1.31233	1.52445	1.30884	0.871287	0.894055	1.3214	0.919998	1.06537	0.827351	1.01418	0.859656	0.585247	0.0933311	0.593943	2.32659	1.22525	1.25736	0.831516	0.93211	0.75132	0.735215	0.468402
MAP4_HUMAN	1.05437	1.09822	0.959201	1.08082	1.00003	1.01623	1.10258	1.03593	1.2261	1.0476	1.14042	0.928794	0.779011	0.507094	0.966721	1.06116	0.849787	0.899282	0.721199	0.67022	0.882918	0.909996	0.372602
MARE1_HUMAN	0.995651	0.970094	0.990457	1.0231	0.979118	0.92866	1.01388	0.964714	0.98294	0.874892	0.986839	1.04936	0.732761	0.516006	0.918896	1.02317	0.811992	0.952295	0.791089	0.85044	0.931291	0.927357	0.319169
MAT2B_HUMAN	0.931284	0.892034	0.919836	0.945164	0.947581	0.931044	0.99663	0.932646	1.03929	0.901322	1.00765	0.947406	0.775909	0.618384	0.969328	0.94988	0.991124	0.936607	0.838865	1.41712	0.942823	0.988265	0.113458
MATR3_HUMAN	1.07185	1.10232	1.12691	1.15294	1.06025	1.15766	0.975309	1.13366	1.08335	1.03375	1.08082	0.943334	1.37617	1.33614	1.05496	1.01706	1.03528	0.985524	1.24758	1.35967	1.06121	1.11922	-0.299098
MBB1A_HUMAN	1.11225	1.10457	1.04396	1.01275	1.06605	1.11506	1.03117	1.07075	0.855282	0.84213	0.85938	0.737002	0.935143	0.640743	1.0033	0.96266	1.10375	0.898919	0.863036	0.157331	0.90822	0.967465	0.55318
MBD2_HUMAN	1.09705	0.980952	1.12091	1.16581	1.03293	1.13115	0.962395	1.1597	1.08753	1.1008	1.06656	0.967492	1.04383	0.615608	0.971145	0.91712	0.682198	0.993402	1.11623	1.1272	1.32346	1.12441	0.103524
MBD3_HUMAN	1.11798	1.20546	1.32772	1.13363	1.09997	1.13689	0.930851	1.0156	1.30777	1.10142	1.31922	1.10777	1.04557	0.996562	0.93928	0.939501	0.950203	0.934214	1.18214	1.24126	1.14271	1.17118	-0.347196
MBNL1_HUMAN	0.941332	0.957896	0.9731	0.986475	1.00786	0.887205	0.870826	0.851814	0.866831	0.962785	0.838813	0.739487	1.0714	0.938046	0.858275	0.723691	0.982746	0.896608	1.03755	1.2431	1.01695	1.02424	0.0517653
MCCA_HUMAN	1.09355	1.32162	1.28081	1.0797	1.13772	1.15648	0.977022	1.21013	1.41773	1.32423	1.17979	1.32511	1.3977	1.48801	1.12146	1.05816	1.22711	0.981259	1.06771	1.11997	1.04933	1.13103	-0.408417
MCCB_HUMAN	1.21339	1.21263	0.974035	1.08532	1.12875	1.20735	1.20531	1.1062	1.27447	1.50723	1.19621	1.46185	1.54484	2.1728	1.1066	0.996162	1.33855	1.01232	1.24251	1.3829	1.23232	1.23934	-0.605334
MCM2_HUMAN	0.816352	0.824075	0.886729	0.857539	0.86303	0.836026	0.889905	0.895405	0.781682	0.704103	0.829217	0.705447	0.693087	0.763522	0.866795	0.933504	0.934172	0.914802	0.95668	1.00071	0.941358	1.03556	0.385915
MCM3_HUMAN	0.85339	0.841797	0.835854	0.863577	0.887479	0.898372	0.914777	0.935535	0.788105	0.703233	0.910503	0.75818	0.745236	0.819978	0.903842	0.886786	0.959591	0.940919	1.1412	1.23326	0.915357	1.08338	0.0615613
MCM4_HUMAN	0.856839	0.901178	0.894823	0.944002	0.937042	0.918651	0.945213	0.960351	0.810344	0.723602	0.821972	0.681739	0.778729	0.96772	0.931564	0.897738	0.94623	0.887334	1.0557	1.09542	0.962099	1.04551	0.23354
MCM5_HUMAN	0.881727	0.865349	0.77012	0.788547	0.887721	0.890195	0.911541	0.883325	0.701474	0.63586	0.72102	0.597998	0.681317	0.822161	0.900776	0.864036	0.900963	0.90576	0.926124	0.780838	0.855706	1.01717	0.534111
MCM6_HUMAN	0.837162	0.902605	0.922246	0.959869	0.912639	0.884973	0.935934	0.980478	0.790985	0.740037	0.7929	0.672944	0.718915	0.790367	0.905883	0.884346	0.915715	0.946165	1.02397	1.08617	0.94188	1.08583	0.386371
MCM7_HUMAN	0.802058	0.857892	0.922424	0.874585	0.90021	0.853187	0.892302	0.926079	0.740906	0.609016	0.743291	0.636245	0.708342	0.792871	0.900915	0.861856	0.91968	0.839649	0.972533	0.93603	0.899267	1.03655	0.450294
MCTS1_HUMAN	1.06147	1.12332	1.25505	0.939238	0.833502	0.79627	0.864675	0.90364	1.1066	1.02627	0.862178	0.885091	0.758704	0.70516	0.897379	0.928958	0.869853	1.02214	0.711806	0.827393	0.869142	0.90049	0.414112
MDHC_HUMAN	0.935102	0.876994	0.963818	0.913755	0.95634	0.875894	0.957259	0.91761	0.915798	0.7924	0.908422	0.768973	0.706582	0.420249	0.904603	0.997276	0.799782	0.988483	0.699935	0.679283	0.907132	0.848042	0.63024
MDHM_HUMAN	1.16651	1.20138	1.10073	1.16257	1.11531	1.25633	1.10852	1.18131	1.40074	1.27314	1.25089	1.41912	1.67226	2.63496	1.06741	1.00815	1.13877	0.970436	1.12657	1.32722	1.05601	1.15512	-0.584823
MDN1_HUMAN	1.118	1.0424	0.759366	0.971388	1.05243	1.00655	0.993589	1.05906	0.88361	0.971551	0.951194	0.816376	0.898568	0.612028	0.972406	1.02322	1.01613	1.02044	0.946845	0.54621	0.877288	0.90061	0.565157
MED24_HUMAN	1.30129	1.4101	1.00904	1.04801	0.865934	0.925418	0.948305	1.29192	1.15219	1.20113	0.736398	0.933976	0.897916	0.992788	1.06122	0.905553	1.12941	0.911879	1.50954	0.994706	1.03931	1.24362	0.231297
MEF2D_HUMAN	0.905015	1.002	0.697427	0.920184	0.96924	0.992374	0.856685	0.843631	1.09387	1.02966	1.09855	1.28696	0.779532	0.752642	0.998776	0.924876	0.835233	0.855703	0.668245	0.719131	0.995997	1.06718	-0.165686
MEMO1_HUMAN	1.15007	1.07815	1.111	1.06175	1.00848	0.8833	1.19914	0.976788	1.00334	1.05087	1.11503	0.983795	0.721125	0.458864	0.944108	0.980158	0.852666	0.878464	0.728092	0.864867	0.797126	0.764633	0.282088
MESD_HUMAN	1.04205	1.04968	1.01353	0.971543	0.98602	1.0583	0.960828	0.9814	1.03501	0.681099	0.902311	0.8638	1.36444	1.76136	1.14788	1.12679	0.908111	0.789687	1.00108	1.20728	1.08299	1.18228	-0.178006
MET7B_HUMAN	1.21877	1.16875	1.24144	1.21363	1.1323	1.16	1.1358	1.06452	1.21505	1.02717	1.04815	1.06068	1.15931	1.07012	1.08952	1.0046	1.02912	0.822794	1.13642	0.801393	0.995318	1.11613	0.104829
METK2_HUMAN	0.919079	0.859109	1.02113	0.96693	0.994038	0.904712	0.992353	0.884744	0.926603	0.869678	0.890755	0.783829	0.71713	0.621092	0.895494	0.963408	0.808561	0.905114	0.783452	1.20247	0.91317	0.957758	0.334159
MFF_HUMAN	1.12017	1.13632	1.08804	1.06065	0.921214	0.925771	0.943505	0.972302	1.22332	1.24252	1.12438	1.11246	1.33389	0.855142	1.03542	1.08274	1.13766	0.919329	1.08079	0.729637	1.00708	1.07821	0.132875
MFS10_HUMAN	1.11134	1.17099	1.05297	1.10016	1.153	1.09353	1.08068	1.02024	1.1857	1.09547	1.27293	0.825664	0.732289	0.426279	0.757186	0.828208	0.914762	0.511827	0.653325	0.524975	0.813621	1.29443	0.19147
MGAT1_HUMAN	1.1219	1.41743	1.08723	1.0708	0.950969	1.09385	0.982446	0.855627	1.48681	1.05174	1.13582	1.50285	0.966192	1.30637	0.980406	1.05905	0.98587	1.07914	1.12035	0.847748	0.851657	0.95094	-0.359944
MGN2_HUMAN	0.903547	0.903044	0.948335	0.9176	1.04623	1.15946	0.982917	1.03264	0.825095	0.939079	1.09394	1.00186	0.851152	0.750489	1.02767	0.910352	0.989939	0.990015	0.92347	0.728876	1.12205	1.19503	0.103405
MGST1_HUMAN	1.10966	0.934224	0.896843	0.965243	1.03676	1.02153	0.907703	0.991749	0.959715	0.861947	0.814215	0.720206	1.0675	1.02656	0.995674	0.966638	0.997619	0.971466	1.12858	0.865497	0.976898	1.11669	0.452815
MGST3_HUMAN	0.79473	0.955895	0.866427	1.28631	0.980941	0.840459	1.10075	0.951429	0.724955	1.59823	0.973958	1.08933	0.871408	0.490873	0.954224	0.779429	1.42095	1.26718	1.47654	1.29335	1.44625	0.947075	0.0383358
MIA3_HUMAN	1.0195	0.997757	0.965782	1.15249	1.12062	1.22536	0.966019	1.15662	1.06472	0.729494	0.813881	0.690026	0.94159	1.15554	1.05521	0.943418	0.871382	0.9552	1.21832	0.87081	1.06731	1.06272	0.260203
MIC13_HUMAN	0.951297	0.917962	0.931892	0.958153	0.885811	0.966672	0.833023	0.919573	1.26125	1.03456	0.943234	1.2279	1.21772	1.46252	0.895761	0.941304	0.897743	1.02878	1.17708	1.1622	1.00454	1.08068	-0.572895
MIC19_HUMAN	0.97842	1.04796	1.05776	1.07544	1.05499	1.12989	0.930642	1.0825	1.12792	0.923592	1.03046	0.982298	1.33693	1.46798	1.08197	1.0317	1.07013	0.923278	1.15245	1.01182	1.24342	1.13538	-0.234257
MIC60_HUMAN	1.09087	1.2437	1.09468	1.08346	1.06444	1.13118	1.09562	1.11298	1.28664	1.18011	1.20087	1.29547	1.40878	2.16588	1.07825	0.970676	1.06469	0.918017	1.03294	1.16127	1.06275	1.16488	-0.567259
MICA1_HUMAN	1.01346	0.957853	0.955288	0.98426	0.952333	0.822323	1.0243	0.843503	0.859938	0.958729	0.885466	0.938157	0.740487	0.81249	0.938081	0.955609	0.889634	1.02759	0.67073	0.791834	0.836947	0.778906	0.348076
MIF_HUMAN	0.933247	0.826408	0.861151	0.860267	0.990054	0.884897	0.979933	0.905811	1.00786	0.867495	0.795631	0.719949	0.734411	0.2996	0.875939	0.983699	0.818032	0.946061	0.672118	0.772164	0.881019	0.868728	0.692699
MINP1_HUMAN	1.76168	1.29159	1.30605	1.51372	1.1085	0.95729	0.847972	1.30448	1.09078	0.906046	0.781162	1.10178	1.15904	1.44831	1.16934	1.06266	0.985347	0.903417	1.51642	1.65315	0.902133	1.24213	-0.0748186
MIRO2_HUMAN	1.27068	1.06285	0.942018	0.93421	1.03942	0.91738	0.969029	0.952244	0.963445	0.917233	0.909496	0.774172	0.952469	1.02507	0.938262	1.08883	1.09461	0.954722	0.634216	0.298427	1.02824	1.07523	0.450977
MK01_HUMAN	0.83216	0.790196	0.847722	0.889332	0.875682	0.829086	0.909545	0.850325	0.909337	0.859278	0.798639	0.813191	0.608556	0.432019	0.906002	0.960914	0.846487	1.00744	1.03563	1.04728	0.927785	0.951225	0.405908
MK14_HUMAN	1.01986	0.956978	0.966415	0.864196	0.889783	0.962508	0.897578	0.859965	0.981849	0.996017	0.890973	0.910781	0.659007	0.976783	0.948285	1.09723	0.677887	1.02314	0.682662	0.675191	0.923842	0.871361	0.166196
MK67I_HUMAN	1.19014	1.25682	1.09804	1.10522	1.00837	1.18157	1.00418	1.05796	1.08907	1.00953	0.940645	0.938616	0.865524	0.615015	0.911152	0.966453	1.07862	0.876607	1.01601	0.650189	0.966592	1.16364	0.437461
ML12A_HUMAN	0.979435	0.965893	0.988143	1.04029	1.03148	1.04199	1.05385	0.990378	1.02709	1.00271	0.888886	1.13257	1.10019	1.80835	0.89571	0.993052	0.854734	1.00711	0.84531	1.37499	0.97142	0.99124	-0.503276
MLEC_HUMAN	1.07355	1.03043	0.997273	0.966162	1.02579	1.21752	1.03084	1.03379	1.06665	0.854368	0.892833	0.90661	1.07644	1.24371	0.980161	0.91714	1.02886	0.861321	0.917702	0.660473	0.845792	1.01955	0.0609644
MMP14_HUMAN	1.02671	0.987936	1.09624	1.14585	1.09314	1.10445	1.07148	0.979404	1.13141	1.01657	1.04007	0.855563	1.14238	0.939222	0.988417	0.981338	1.08697	1.04013	0.930977	0.798988	1.01344	1.14765	0.438074
MMP9_HUMAN	1.00558	0.942184	0.991551	0.953996	0.990337	1.08669	0.888611	1.02379	0.896511	0.80169	0.753634	0.755338	1.21001	1.08868	1.14022	1.06494	1.29868	1.19122	1.72155	1.49368	1.04681	1.28995	0.128469
MMS19_HUMAN	1.04878	0.969021	0.745801	0.937087	1.07284	0.953222	1.0213	1.00173	0.974365	1.04767	1.20457	1.07817	0.781622	0.941997	0.82752	1.01437	0.971519	1.07525	0.77526	0.543151	0.918387	0.747242	-0.0662394
MOB1A_HUMAN	0.815622	0.877023	0.9047	0.912019	0.91455	0.816024	0.935693	0.869489	0.807155	0.83818	1.06585	1.04025	0.531817	0.400191	0.866134	1.03447	0.79908	0.915277	0.646623	0.736435	0.976926	0.956813	0.195544
MOES_HUMAN	0.973328	0.89823	1.00445	0.966812	1.03527	1.00526	1.0402	1.01541	1.00692	0.924962	0.933634	0.812083	0.863383	0.474493	0.916693	0.986284	0.867296	0.963686	0.839299	0.818943	0.970114	1.00213	0.605255
MOGS_HUMAN	1.18886	1.19227	1.00534	1.07199	0.936484	0.932295	1.03792	1.02408	0.914986	0.803368	0.924815	1.08122	1.06715	1.14406	1.02099	0.899956	0.968986	0.806992	0.85017	0.567047	0.75408	0.946068	0.0418216
MORC3_HUMAN	0.969404	0.976728	0.862877	1.05377	1.00847	1.12656	0.959844	0.891252	0.991754	0.969516	1.00368	0.664111	0.776725	0.697952	0.992279	1.01403	1.08183	1.0896	0.943745	0.721175	1.08984	1.28909	0.534214
MOT1_HUMAN	1.08415	1.14147	1.49203	1.42772	1.06779	1.07583	1.02684	0.970061	1.10544	1.03815	1.08735	1.04692	0.954462	1.16219	1.25329	1.0296	0.86226	1.00747	0.857432	0.829246	1.01882	0.928788	0.0392502
MOT4_HUMAN	0.904852	0.889037	0.95579	1.0099	1.02148	1.00622	1.10179	0.996063	0.916178	0.761171	0.820611	0.860017	1.23804	0.976213	1.05981	1.05788	1.0158	1.00778	1.11067	0.871786	1.11062	1.21836	0.40063
MOV10_HUMAN	0.637975	0.973211	0.913126	0.931958	0.916862	0.836353	0.957052	1.02112	0.934604	0.591945	0.997315	0.632826	0.767274	0.786087	0.94093	0.949984	0.807044	0.870757	0.654404	0.72652	0.935294	0.861399	0.431127
MP2K2_HUMAN	0.842016	1.06192	0.960339	0.826129	0.84329	0.87685	1.00695	0.804483	0.866671	0.852273	0.853057	0.863059	0.706023	0.631071	0.978669	1.0159	0.783985	1.07365	0.729073	0.745642	1.20162	0.925201	0.502994
MPC2_HUMAN	1.09475	1.08767	1.69169	1.40304	1.27232	1.11951	1.413	1.18598	1.05699	1.32893	0.849408	0.957284	1.19396	1.21413	1.1209	1.22287	1.09556	0.980351	0.811138	0.9295	1.24873	1.31304	0.292093
MPCP_HUMAN	1.1419	1.11929	1.08582	1.07417	1.04543	1.06637	1.10689	1.05056	1.21057	1.21608	0.974217	0.925637	1.2114	1.41645	1.15663	1.03361	1.06538	0.95871	1.01417	0.639993	1.22452	1.16738	0.112059
MPP10_HUMAN	1.05558	0.923613	0.9322	1.02951	1.05017	1.15647	1.04234	1.04238	1.1715	1.27038	1.3085	1.36163	1.24239	1.47496	0.999034	1.12098	1.15701	1.05092	1.22428	1.3922	1.41828	1.5856	-0.604284
MPP8_HUMAN	1.53893	1.26689	1.25837	1.31189	1.08204	1.17337	1.07356	1.12313	1.3998	1.20924	1.18316	1.01582	1.0982	0.726117	0.982758	1.06521	1.01336	0.915186	1.02515	0.596595	0.892572	1.00373	0.274053
MPPA_HUMAN	1.13471	1.13974	1.06459	1.12695	1.04301	1.15659	1.06983	1.16397	1.36004	1.50732	1.35598	1.51822	1.49064	2.04324	1.12683	1.0534	1.20478	1.04834	1.26143	1.2761	1.0486	1.19562	-0.716999
MPPB_HUMAN	1.12681	1.15679	1.05838	1.05541	1.09742	1.21802	1.12103	1.13057	1.43295	1.27924	1.26737	1.27229	1.35252	1.65284	1.11766	1.01485	1.16121	0.973324	1.13564	1.21718	1.1048	1.09821	-0.59823
MPRD_HUMAN	0.923743	0.888673	0.960784	0.934039	1.05643	1.17664	1.05458	1.06892	0.979029	0.898525	0.876878	0.834057	1.07275	1.16948	1.00798	1.04137	1.04357	0.960519	0.995102	0.877389	1.02473	1.04954	0.195725
MPRI_HUMAN	1.00879	1.06101	1.04428	1.05599	0.996326	1.06269	1.00202	0.994551	0.973091	0.901375	0.970541	0.928947	0.964848	0.994996	1.03916	1.02652	1.03674	0.993224	1.11711	0.87628	0.937229	1.02455	0.336703
MRC2_HUMAN	0.940506	1.08757	0.88511	1.13763	1.01654	0.985153	1.02437	1.02876	0.794117	0.70234	0.845293	0.697058	0.956737	0.668193	1.05989	1.0138	1.01626	1.00668	0.635073	0.272458	1.01666	1.10227	0.623973
MRE11_HUMAN	1.05809	0.994569	0.988366	1.10834	0.971826	1.0179	0.882363	0.962369	1.09185	1.0145	1.02593	1.17703	1.13717	1.2477	1.07445	1.02381	0.989295	0.944836	1.08189	1.21261	1.06726	1.04805	-0.583707
MRRP1_HUMAN	1.13688	1.15406	0.969801	1.0335	1.07418	1.08585	1.08409	1.12886	1.27112	1.07294	1.11656	0.921701	1.25326	1.40385	1.05083	1.016	1.15947	0.976981	1.07203	1.00061	1.09038	1.35254	-0.0620212
MRT4_HUMAN	0.911761	0.830087	0.874385	0.891335	1.05775	1.16457	1.00887	1.08175	0.934296	0.670896	0.894814	0.860838	0.93243	0.773598	1.02991	0.938154	1.0731	1.09518	1.08721	0.87746	1.03537	1.02995	0.400728
MSH2_HUMAN	0.840077	0.831006	0.880456	0.892063	0.905068	0.901636	0.972959	0.983289	0.932902	0.859323	0.977048	0.866734	0.733588	0.770151	0.958174	0.893332	1.14214	1.13386	1.19315	1.25118	0.918499	1.01762	0.0863898
MSRA_HUMAN	0.75349	0.883756	1.07093	0.958508	1.0352	1.12781	1.03384	0.925353	1.00475	0.98522	0.959056	1.15114	0.712847	0.716759	0.655028	0.74727	0.907072	0.987913	0.964578	0.966831	0.870532	0.752835	-0.266795
MSRE_HUMAN	1.27934	1.13507	1.65347	1.48331	0.938865	0.86681	1.17288	0.949875	0.8655	1.14372	1.40989	1.76878	0.956023	1.01503	1.11654	1.01077	1.31001	1.27053	1.11706	1.10389	1.01389	0.999341	-0.348139
MTA2_HUMAN	1.0748	1.16276	1.40732	1.11723	1.18745	1.33549	1.14166	1.2388	1.21187	0.742578	0.90565	0.479156	0.81188	0.652362	1.04162	0.982926	1.06871	0.906145	0.931935	0.530313	1.3663	1.43072	0.581331
MTCH1_HUMAN	1.15102	1.09048	0.792239	0.995118	0.903605	0.951748	1.00274	0.888504	0.989354	1.71608	0.817746	0.808041	1.26687	0.982231	1.21705	1.33084	1.31122	1.0273	1.20087	0.755511	1.1402	1.04695	0.342422
MTCH2_HUMAN	1.07321	1.05238	1.08361	0.979843	1.02716	1.05695	1.09009	0.966811	0.915451	0.83632	0.782633	0.675219	1.09362	0.983529	1.01262	0.972531	1.08857	0.911392	0.9228	0.580098	1.07746	1.13004	0.613151
MTDC_HUMAN	1.09586	1.22046	1.01347	1.23009	1.03433	1.2035	1.19562	1.22792	1.23536	1.48812	1.44755	1.49542	1.6519	2.42	1.19374	1.0407	1.46971	1.26351	1.44715	1.69549	1.20118	1.33024	-0.659408
MTOR_HUMAN	1.10734	1.03093	1.02207	1.11486	1.09344	1.10424	1.10277	1.06087	0.907621	1.00719	1.11348	1.09143	0.909249	0.836832	0.986981	1.09402	1.01076	1.01397	0.992823	0.746953	0.953778	0.818019	0.11533
MTPN_HUMAN	0.91079	0.903405	1.01816	0.941726	0.905509	0.922761	0.947409	0.924436	0.960081	0.97234	0.987261	1.05088	0.714304	0.524316	0.854804	0.893007	0.756683	0.91627	0.681543	0.793124	0.956517	0.84532	0.147263
MTSS1_HUMAN	0.927029	0.927863	0.813103	0.947088	0.969387	0.979356	0.964437	0.930188	0.923761	0.949569	0.83289	0.881163	0.948196	0.968951	0.878682	0.923492	0.936512	1.04918	1.03077	0.508067	1.02728	1.03551	0.270602
MTX2_HUMAN	1.04556	0.94649	0.871169	0.966124	1.05181	1.13768	0.99123	1.09971	1.14486	1.05948	1.17119	1.25903	1.4981	1.72074	1.0973	1.06195	1.13746	0.999124	1.17371	1.29841	1.12671	1.05709	-0.579923
MUTA_HUMAN	1.3025	1.05607	1.09082	1.2735	1.34946	1.2241	1.2233	1.36292	1.38556	1.29396	1.09222	1.18301	1.40569	1.28315	1.23355	1.34084	1.24984	1.02757	1.26883	1.01278	1.17948	1.2369	0.110772
MVP_HUMAN	0.95081	0.965836	1.04831	1.02975	1.00189	1.00013	1.03405	0.991077	0.980675	0.986045	1.02126	0.952019	0.916826	0.989575	1.00555	1.0416	0.919981	1.01007	0.920496	0.909787	1.04111	0.936804	0.179118
MX1_HUMAN	0.909412	1	0.76754	0.865344	0.89843	0.96439	0.911865	0.841599	0.91629	0.663449	0.935352	1.0565	0.818015	1.12731	0.973744	1.0376	0.931396	0.968018	0.830843	0.792398	0.914236	0.889839	-0.114661
MY18A_HUMAN	1.12353	1.14178	0.905066	1.11642	0.929086	0.848575	0.868713	0.835541	0.967977	0.910443	0.883843	1.04245	0.811411	1.49773	0.798676	0.845063	0.913008	1.03138	0.903567	0.921165	0.802243	0.743095	-0.340086
MYCBP_HUMAN	0.961226	0.859597	0.949882	0.91753	1.01607	1.11886	1.04127	1.12559	0.849967	1.0851	1.24357	1.43934	1.03366	1.26	0.913198	0.900069	0.989379	1.11184	1.22278	1.65424	0.905425	1.02432	-0.754024
MYDGF_HUMAN	1.04088	1.08582	1.02082	1.06989	1.0443	1.07591	0.938333	1.13426	0.786007	0.794881	0.964219	0.947795	1.28945	1.55901	1.15337	1.05774	1.0391	0.940737	1.16964	1.32048	1.13206	1.07748	-0.251945
MYL6_HUMAN	0.934435	0.897657	0.980871	0.981858	1.03386	0.957846	1.04264	0.960502	0.971319	0.85018	0.996474	0.95795	1.02719	1.35438	0.922804	1.00118	0.815334	0.981636	0.781636	1.07445	0.944155	0.972876	-0.346596
MYO1C_HUMAN	1.21936	1.24941	1.0151	1.15439	1.06366	1.10048	1.25303	0.985991	0.820353	1.15993	1.05695	1.14059	0.795398	0.648174	0.998162	0.869043	0.939013	0.99383	1.03766	0.85257	1.1254	1.01606	0.133073
MYO1E_HUMAN	0.908351	0.872282	0.894005	0.890003	0.939468	0.841359	0.905486	0.836343	1.0322	1.07796	1.06399	1.12944	0.770383	0.730538	0.96868	0.973757	0.897051	0.952499	0.773629	0.795022	0.869811	0.864251	-0.0621663
MYO1F_HUMAN	1.05819	0.974525	1.05141	0.881123	0.972547	0.911946	0.988601	0.93669	1.06604	0.947332	1.06358	1.14869	0.78803	0.850916	0.973987	1.00215	0.975961	1.01667	0.883277	0.754119	0.888538	0.842128	0.0205257
MYO6_HUMAN	0.969611	0.960818	0.837658	0.930788	1.01242	0.873304	1.00334	0.927331	0.808027	0.813323	1.01353	0.902594	0.621232	0.674335	0.842842	0.928918	0.80611	0.921727	0.693	0.598041	0.754705	0.808708	0.246886
MYO9B_HUMAN	1.04101	0.936556	1.38664	0.959696	1.02451	0.949924	1.02608	0.88685	0.895641	0.904269	0.977671	0.985876	0.736411	1.04618	0.992329	0.656686	0.772031	0.754921	0.692279	0.718151	0.70304	0.686864	-0.135906
MYOF_HUMAN	1.03461	1.16916	0.73725	1.04183	1.05138	1.03677	1.05782	0.98712	1.01386	0.639911	0.758285	0.625698	1.08221	0.9824	1.0217	0.999386	1.03009	0.959824	0.933444	0.62112	0.963499	1.01242	0.627644
MYPT1_HUMAN	0.910922	0.906001	0.77681	0.892378	0.817311	0.865191	0.823163	0.8386	0.933507	0.758339	1.16511	1.23554	1.16092	0.867783	1.04845	0.992882	1.06	0.992861	1.1031	1.19602	1.08748	1.17669	-0.296205
NAA10_HUMAN	0.915267	0.974019	0.985328	0.889821	1.07658	1.02863	1.08074	1.12591	0.959144	0.828239	0.794428	0.961511	0.863899	1.12916	0.968707	1.08819	0.88304	1.15043	0.900717	0.926011	1.1084	0.9576	0.236523
NAA15_HUMAN	0.926676	0.920888	0.980014	0.826469	0.913821	0.834095	0.914998	0.847284	0.770629	0.833504	0.807617	0.794216	0.621262	0.648569	0.841317	0.951989	0.822141	0.967368	0.6759	0.513054	0.810023	0.815819	0.524209
NAA25_HUMAN	1.2341	0.90572	1.30958	1.00646	0.786765	0.723625	0.862718	0.632348	0.848238	0.854803	0.823478	0.684636	0.710624	0.540319	1.0286	1.13231	0.826271	0.945917	0.607394	0.49283	0.760463	0.683592	0.537282
NAA50_HUMAN	0.81531	0.850089	0.782597	0.726473	0.965189	0.854906	0.792055	0.961112	0.917798	1.22158	0.899259	0.945435	0.732064	0.643196	0.923549	0.925248	1.05428	1.096	0.902372	1.03462	0.980605	0.973595	0.152736
NADC_HUMAN	0.862555	0.828628	0.962394	0.875059	1.03193	0.971652	0.992221	0.973077	0.946735	0.96989	0.958388	0.82828	0.829323	0.62271	0.974309	1.06292	0.921546	1.04513	0.769616	0.860634	0.937161	0.905586	0.55377
NAGAB_HUMAN	0.966364	0.981711	0.956459	1.03281	1.01482	0.988703	0.932114	0.982052	0.969801	0.894471	1.01164	1.04966	1.27968	1.67091	1.05558	0.985832	1.0559	1.076	1.24098	1.55758	1.21541	1.25021	-0.427475
NAMPT_HUMAN	0.862812	0.909907	0.841158	0.944478	0.94686	0.863023	0.889896	0.869784	0.945197	0.994101	0.907008	0.817506	0.875296	0.571633	0.942802	1.04065	0.847654	0.988113	0.959978	1.00202	0.914015	0.811619	0.469995
NASP_HUMAN	0.92426	0.945946	1.06834	0.933413	0.928834	0.938909	0.959494	0.946407	0.887882	0.807545	0.913198	0.804621	0.752192	0.71751	0.921442	0.911492	0.84775	0.929518	0.857247	1.06292	0.922634	0.966356	0.380902
NAT10_HUMAN	1.30534	1.25759	1.25951	1.13715	1.07327	1.12909	1.03668	1.01177	1.13369	0.854312	1.00365	0.879704	0.921618	0.73984	1.05317	0.985331	1.05432	1.03402	0.915175	0.415813	0.973319	1.04416	0.50375
NB5R1_HUMAN	1.12491	0.998925	0.822457	0.930477	1.0787	1.01814	0.789185	1.01275	1.13174	0.99627	0.829527	0.747096	1.01044	0.833161	0.9999	1.01923	1.27413	0.951233	1.14678	0.724729	1.12733	1.2529	0.532699
NB5R3_HUMAN	1.14466	1.19297	1.09256	1.06891	1.14096	1.17966	1.11244	1.06383	1.07394	1.00761	0.972708	0.942209	1.13121	1.0466	1.03012	0.996108	1.04947	0.890652	1.01204	0.725116	0.950249	1.01209	0.300876
NBAS_HUMAN	1.13906	0.938315	0.868307	0.97706	0.874259	0.901638	0.966231	0.983969	0.906197	0.69672	0.889781	0.806157	1.05485	0.869508	1.05307	0.957747	1.23675	1.03523	1.04156	0.573343	1.26704	1.2259	0.491809
NC2A_HUMAN	1.19686	1.04656	1.13671	1.12506	0.962331	0.851087	1.04262	0.940431	1.12156	1.19357	1.19676	1.08021	0.866727	0.652641	0.939781	0.978327	1.01373	1.13372	1.06992	1.14514	0.942413	0.968494	0.0559856
NC2B_HUMAN	0.977226	0.930407	0.983099	0.915209	1.01862	1.03614	1.03273	1.04581	1.05398	1.17061	1.13477	1.14258	0.914524	0.838953	1.00765	0.973195	1.12343	1.17904	1.17477	1.54482	0.934653	0.859397	-0.249732
NCBP1_HUMAN	0.974491	0.919633	0.967081	0.979722	0.954633	0.947038	0.915998	0.965451	0.893515	0.992819	0.850393	0.854763	0.858058	0.793896	1.00551	0.989525	1.14501	1.07186	1.30899	1.0723	1.04762	1.01753	0.326583
NCEH1_HUMAN	1.36995	1.36117	1.39735	1.19718	0.93742	1.11492	0.914743	1.05131	1.36288	0.857299	0.914822	0.730544	0.987725	0.945931	1.0148	0.98248	1.23559	0.974576	1.14495	0.777021	0.761364	0.81374	0.416421
NCF4_HUMAN	0.867785	0.775799	1.09393	0.858754	0.935737	0.99061	0.953274	0.704224	0.973712	1.20823	1.05097	1.07955	0.71378	0.858548	0.953496	1.32833	0.853751	0.962285	0.708581	1.1555	0.916554	0.916651	-0.122686
NCK2_HUMAN	0.890906	0.832742	0.928182	0.959816	1.02846	1.02876	1.16102	0.991344	0.927238	0.97041	1.14603	1.11195	0.963414	0.843397	1.08525	1.12941	1.04994	1.189	0.873515	1.35264	0.795242	0.957523	-0.0992876
NCKPL_HUMAN	0.916118	0.905274	0.878701	0.935963	0.909839	0.849729	0.966828	0.875758	0.743699	0.967526	1.05437	1.17997	0.748922	0.818604	0.946047	1.02781	1.19056	1.25156	1.04071	0.910014	1.07227	0.886569	-0.0506432
NCLN_HUMAN	1.1735	1.08169	0.887008	0.968252	0.929478	1.00604	0.993055	0.902911	1.13426	0.924778	0.949324	1.12498	1.18958	1.03792	1.07777	0.987545	1.12239	0.926419	0.991283	0.630915	0.867862	1.03247	0.130602
NCOA5_HUMAN	1.0476	0.982895	0.908085	0.942373	1.06217	1.04747	1.0084	1.05632	0.830607	0.845912	1.04485	1.12245	1.27847	1.1774	1.22022	1.17764	1.08648	0.969678	1.10018	1.263	1.09496	1.1199	-0.173958
NCPR_HUMAN	1.18035	1.20173	1.15612	1.15898	1.07289	1.21828	1.10819	1.10535	1.25597	1.07612	1.08188	1.12607	1.05739	0.99922	1.04701	1.00804	1.03598	0.880264	1.1682	0.838287	0.927229	1.08843	0.00310985
NDK3_HUMAN	1.04313	0.982416	1.0407	0.772618	1.04132	0.936999	0.927019	0.925584	0.921452	0.750443	0.932817	0.83025	1.09423	1.46	0.999285	0.92599	1.04257	0.98645	0.951368	0.701924	1.26154	1.11408	0.0121453
NDKA_HUMAN	0.884881	0.956066	0.975659	0.961163	1.13166	1.08307	1.12565	1.09239	1.06029	1.05504	0.883244	0.766967	0.85512	0.669038	1.01318	1.10954	0.946627	1.03112	0.856061	1.01791	0.943837	0.915292	0.623227
NDKB_HUMAN	0.96002	0.885741	0.938768	0.958135	0.996491	0.92592	0.992484	0.956149	0.9411	0.870048	0.89264	0.799129	0.800691	0.539633	0.916427	1.02826	0.798907	0.964986	0.698775	0.727134	0.957262	0.867332	0.640331
NDUA4_HUMAN	1.22354	1.22392	1.12849	0.83502	1.08427	1.22721	1.11446	1.15995	1.13721	0.988451	1.33253	1.16163	1.12528	0.957887	1.04374	1.03104	1.06212	0.777685	1.09411	0.795361	1.14917	0.994238	-0.118856
NDUA5_HUMAN	1.31238	1.42268	1.34785	1.59237	1.18296	1.10051	1.19825	1.19036	1.12967	1.92606	1.25339	1.37243	1.60313	2.47959	1.12886	0.936424	1.17524	1.02389	1.06685	1.2635	0.900532	0.986216	-0.49911
NDUA6_HUMAN	0.93871	1.04033	0.951408	0.882394	1.1059	1.15321	1.03113	1.11322	1.23186	1.11493	1.04633	1.34649	1.34266	2.25481	1.05994	0.980402	1.02505	0.974048	0.977856	0.877069	1.15622	1.29582	-0.496463
NDUA8_HUMAN	1.07706	1.17039	0.934696	1.12009	1.10126	1.11044	1.13198	1.18062	1.37323	1.5277	1.12566	1.43445	1.53354	1.84495	1.03046	0.970133	1.13158	0.977616	1.06815	1.38364	1.01218	1.19434	-0.585752
NDUA9_HUMAN	1.33808	1.42073	1.13546	1.21149	1.04854	1.02003	1.19438	1.11598	1.33716	1.25306	1.1269	1.29961	1.37932	1.5819	1.1773	1.06033	1.22852	1.15071	1.02357	0.715418	0.978667	1.09026	-0.115194
NDUAA_HUMAN	1.05973	1.00049	1.03373	0.990292	1.14327	1.17567	1.30857	1.19383	1.20456	1.34203	1.09218	1.19626	1.47826	1.44327	1.10833	1.05678	1.21524	1.09425	1.13428	1.05784	1.10621	1.29041	-0.289591
NDUAC_HUMAN	1.10439	1.05453	0.9425	1.05257	1.06558	0.986354	1.02887	0.999615	1.19077	1.19893	0.991762	1.29213	1.42175	2.33052	1.01881	0.950252	1.03623	0.962683	0.927286	0.7997	1.02824	1.12037	-0.446575
NDUAD_HUMAN	1.32006	1.2669	1.04755	1.19487	0.997886	1.02614	1.10007	1.03371	1.37721	1.90514	1.52126	1.79941	1.58512	1.65414	1.19466	1.10626	1.22845	1.06575	1.0197	0.985519	1.14203	1.18974	-0.552927
NDUB1_HUMAN	1.23525	1.11249	1.09958	1.20603	1.09166	1.07938	1.07956	1.08499	1.62468	1.10742	1.00084	0.71536	1.14643	1.02459	1.27682	1.03567	1.04991	0.84777	0.665857	0.707491	1.04276	0.994547	0.468618
NDUB4_HUMAN	1.2576	1.06393	1.06041	1.08086	1.15105	1.01262	1.18687	0.777841	1.29261	1.11297	1.26536	1.16997	1.10639	1.00557	1.01004	0.88854	0.837415	0.876769	0.898638	0.783492	0.966935	1.0567	-0.178352
NDUB5_HUMAN	1.32287	1.00329	1.13719	1.03629	1.06053	1.02732	1.07922	0.925565	1.20825	1.04133	0.851007	1.02429	1.31808	1.27853	1.0352	1.01629	0.887539	1.06855	0.709999	0.801352	0.963965	0.978885	0.134477
NDUBA_HUMAN	1.17107	1.21321	1.09491	1.12188	1.01	1.05248	0.970694	1.13037	1.11782	0.998566	1.07059	1.14628	1.11515	1.40085	0.960639	0.970853	1.01462	0.920864	0.968186	0.992152	1.12695	1.07373	-0.405006
NDUS1_HUMAN	1.18597	1.18557	1.03638	1.09292	1.04124	1.1746	1.06401	1.08258	1.43217	1.27113	1.28329	1.4772	1.56845	2.56043	1.11886	0.991532	1.20287	0.991103	0.991445	1.18206	1.10645	1.24379	-0.571181
NDUS2_HUMAN	1.05071	1.10467	1.09884	1.05242	0.987276	1.08923	1.11804	1.06306	1.18395	1.14492	1.14455	1.16928	1.10731	1.36937	1.00159	0.939973	1.19486	0.987553	0.993833	0.760974	1.00801	1.09373	-0.347969
NDUS3_HUMAN	1.18467	1.05356	1.05128	1.03778	0.985145	0.986141	1.01049	1.05618	1.24382	1.16611	1.31866	1.54945	1.55629	2.56359	1.09067	1.02454	1.12788	0.955133	0.962063	0.960598	0.972009	1.22629	-0.585533
NDUS8_HUMAN	1.21151	1.32408	1.11841	1.16577	1.15017	0.987443	1.12665	1.07168	1.12986	1.23513	0.887191	1.54987	1.65773	2.72603	1.14227	1.08047	1.0589	1.02815	0.98543	1.26625	1.06052	1.18827	-0.463023
NDUV1_HUMAN	1.37662	1.3265	1.09506	1.11887	1.05528	1.13863	1.20365	1.26063	1.12507	1.08293	1.18073	1.2	1.59076	2.30421	1.12749	0.969483	1.23727	1.01552	1.12038	1.13586	1.0365	1.17252	-0.411749
NDUV2_HUMAN	1.12443	1.18101	1.03255	1.08117	0.906877	1.03131	0.978517	1.07655	1.50982	1.07469	1.26326	1.52933	1.59474	2.87324	0.981535	1.07163	1.12561	1.0654	1.10377	1.29719	1.09834	1.22836	-0.570076
NEB2_HUMAN	0.977849	1.04351	1.10039	1.18274	1.07826	1.1512	0.985178	1.13431	1.15377	0.876443	1.0686	1.02959	1.06342	1.0927	0.936951	0.928559	0.987627	1.00723	1.15571	1.08967	1.1511	1.08499	-0.237989
NECP2_HUMAN	0.77773	0.817782	0.89735	0.755216	1.12175	1.00281	0.988269	0.945284	1.07912	0.98642	1.1108	1.28631	0.816937	0.547725	0.879007	0.975289	0.745225	0.95829	0.865192	1.05069	0.796345	0.908844	-0.215564
NECT2_HUMAN	0.885328	0.984954	0.982128	1.1048	1.05798	1.12256	1.12679	0.870813	0.988775	1.02613	1.37938	0.999785	1.26351	0.753048	1.10156	0.976196	1.16427	0.873727	1.02418	0.791792	0.917009	1.04455	-0.00822097
NEDD8_HUMAN	0.96526	1.00262	1.24843	1.02815	0.621176	0.755011	0.901952	0.776114	0.723455	1.03492	0.851679	1.03152	1.02122	0.498458	1.16017	1.15797	0.843263	1.03624	0.763009	0.942962	0.96003	0.858952	0.333381
NEK9_HUMAN	1.12994	1.05454	1.01407	0.960757	0.869551	0.696454	0.856263	0.767206	0.933855	0.982359	0.791371	0.760835	0.978635	0.977104	1.16747	1.13542	0.631747	0.954323	0.615074	0.686749	1.02522	0.916505	0.437925
NELFB_HUMAN	1.17017	1.07569	0.897287	1.089	1.02016	0.791325	1.00285	0.859827	0.950002	0.903513	0.899027	0.79302	0.828332	0.798563	0.964682	1.14964	0.96931	0.956509	0.975204	0.844831	0.948241	0.990067	0.64276
NELFD_HUMAN	0.822165	0.93325	0.93417	0.966203	1.03482	0.98101	1.01591	1.02586	0.462758	1.02451	1.04392	1.16914	0.905702	0.760984	1.22896	1.17564	1.44505	1.03276	1.21154	1.16973	1.07267	1.08482	0.0250667
NEMO_HUMAN	1.15835	1.09213	1.50467	1.21442	0.858641	0.910222	0.908226	0.78922	1.18706	1.50546	1.30887	1.27886	1.12502	1.02724	1.13577	1.08344	0.964299	1.0941	0.833805	1.29257	0.97196	0.785906	-0.273298
NENF_HUMAN	0.918829	1.12477	0.703622	0.992273	0.89024	0.992946	0.878136	0.947558	1.00348	0.744556	0.900156	1.10273	1.29693	1.77049	1.04282	1.01887	0.967204	0.943686	1.16358	1.22716	1.0309	1.17331	-0.389871
NEST_HUMAN	0.779658	0.974659	0.877525	1.03414	1.05864	1.20646	0.905722	1.03995	1.17566	0.874295	1.09609	1.17963	0.964694	0.806572	1.00754	1.0104	1.03764	0.991719	1.23347	1.20657	1.08558	1.2096	-0.203874
NEUA_HUMAN	0.945621	1.02391	0.833686	1.08921	0.95169	1.01838	0.876962	0.93637	0.781279	0.876272	0.893246	0.838563	0.953433	0.989949	0.990458	0.964035	0.866974	0.870378	0.832849	1.06064	0.913937	1.083	0.0810959
NEUG_HUMAN	1.02819	0.737856	1.74087	1.1246	1.23151	0.843099	1.314	1.31725	0.79371	0.927692	1.28049	1.41174	0.790518	0.415037	0.882275	1.04084	0.958015	1.00067	0.69448	0.723306	0.818162	0.748177	0.0196501
NEUL_HUMAN	0.844098	1.04058	0.783399	0.908572	0.985505	1.05341	1.00577	0.963246	1.18582	1.13247	0.986737	1.15654	1.23156	1.35661	1.07371	1.02928	1.02548	0.914287	0.956202	0.988629	0.969341	1.08851	-0.372813
NEUR1_HUMAN	0.906952	1.00402	0.899198	0.740778	0.949313	1.0297	1.00922	1.03214	0.956448	0.922251	1.17874	0.980025	1.0756	1.07426	1.12955	1.08934	1.22221	1.20915	1.5052	1.55042	1.24633	1.04319	-0.158683
NFKB1_HUMAN	0.952584	1.03477	0.716974	0.793457	0.845311	0.661927	0.992789	0.752922	1.07043	1.3143	1.1178	1.0052	1.04918	1.10723	0.964004	1.03478	0.941368	1.10937	1.38439	1.25746	0.916793	0.760873	-0.273765
NGAP_HUMAN	0.995212	1.16317	1.2354	0.890569	1.05088	0.74731	0.967613	0.927464	0.831153	0.908913	1.15657	1.22049	0.715234	0.704495	0.887285	0.936254	1.05793	1.17706	0.82233	0.83366	0.924735	0.950616	0.0335593
NH2L1_HUMAN	0.993824	0.985045	1.01794	1.09142	1.08618	1.0657	0.951392	1.00996	1.16275	1.05478	1.15954	1.00766	1.29171	1.47544	1.02309	1.05872	1.07715	0.926547	1.25904	1.30903	1.20194	1.25555	-0.466977
NHLC2_HUMAN	0.932813	0.91345	1.00401	0.914658	0.936913	1.01025	0.923581	0.812971	1.28917	1.28479	1.19594	1.2962	0.837209	0.644806	0.95334	1.09638	0.809054	0.906163	0.705163	0.665719	0.760991	0.889801	-0.113286
NHP2_HUMAN	0.910749	1.12968	1.07276	1.15609	1.07819	1.30069	0.984849	1.17672	1.25961	1.47472	1.01077	1.04433	0.997309	1.31441	0.928675	0.864884	1.04049	1.14646	1.25119	1.4259	1.32071	1.58441	-0.296091
NIBAN_HUMAN	0.76818	1.04573	1.02712	0.855626	1.03849	0.931153	0.976582	0.887667	0.861176	0.907368	0.922109	0.847897	0.800086	0.793335	0.952079	1.0144	0.843337	1.02882	0.671551	0.548448	0.942852	0.963722	0.427356
NIBL1_HUMAN	0.910265	0.949486	0.96343	0.952945	0.897564	0.838696	0.992148	0.884112	0.886625	0.859691	0.914191	0.867992	0.708736	0.541673	0.884289	0.929476	0.853145	0.987974	0.693673	0.596478	0.865267	0.917553	0.524134
NICA_HUMAN	1.1912	1.11698	1.01688	1.03872	0.932045	0.996318	1.11496	1.02091	1.03266	0.927332	1.07298	1.07858	1.04093	1.05444	1.02413	0.941686	1.02419	0.947046	0.80285	0.763856	0.92591	0.927622	0.0532038
NIF3L_HUMAN	0.851699	0.975371	0.940043	1.00197	0.94961	0.855844	0.959612	0.836329	1.10267	1.06688	1.0975	1.13773	0.860522	0.803989	1.1451	1.04725	0.92922	0.976139	0.864963	0.974093	1.28487	0.956533	0.0235012
NIT1_HUMAN	1.066	0.851613	1.09835	1.09299	0.919378	0.878686	1.0345	0.945277	0.823685	1.16712	1.15835	1.07087	1.11357	0.724449	1.07585	0.967226	0.952452	0.933217	0.900646	1.10953	0.91764	0.851543	-0.0945109
NIT2_HUMAN	0.922106	0.755729	0.834942	0.887046	0.996067	0.929274	1.0563	0.945178	0.941861	1.05153	0.785753	0.894954	0.75542	0.544612	0.949328	0.962137	0.808672	0.941433	0.691698	0.824324	0.788071	0.81391	0.443683
NKRF_HUMAN	1.12246	1.05296	1.02174	1.14912	1.06608	1.13603	0.861118	1.11346	0.930459	0.792801	0.798548	0.560091	1.10699	1.00207	1.08069	1.10138	0.978881	0.875081	0.904593	0.613034	1.20037	1.10602	0.581021
NLRX1_HUMAN	1.66656	1.30082	1.11063	1.24816	1.10064	1.04716	1.17626	0.943627	2.01339	2.0507	2.07006	1.39648	1.18567	1.29214	1.07969	1.05392	1.35826	1.04778	1.14628	0.676623	1.03495	1.11443	-0.257144
NLTP_HUMAN	0.986934	0.982504	1.00927	1.07481	1.0617	1.16373	0.98444	1.09444	1.08884	0.944149	0.922521	0.931514	1.21899	1.35321	1.03135	0.990827	1.03077	1.00903	1.23092	1.37724	1.11455	1.17095	-0.238932
NMT1_HUMAN	0.970712	0.936254	1.02978	1.01225	0.945618	0.931049	0.943432	0.937963	0.893698	0.802905	0.861577	0.838451	0.812858	0.46256	0.837448	1.02799	1.12701	1.17452	0.892742	0.8011	0.923746	0.929357	0.641662
NNRE_HUMAN	1.05218	1.02801	0.849426	1.03176	1.00129	0.932411	0.992361	1.00351	1.04159	0.973511	1.18863	0.955166	0.934904	0.892249	0.976525	0.98194	0.878122	0.998103	0.817935	0.752596	0.875209	0.937977	0.0778971
NNTM_HUMAN	1.15417	1.21769	1.16421	1.21036	1.14377	1.1962	1.23989	1.11609	1.45323	1.18834	1.03215	1.07055	1.16511	1.28639	1.08387	0.975894	1.08784	0.8997	0.862306	0.601236	1.16425	1.18003	0.117942
NOC2L_HUMAN	1.03037	0.928599	0.869503	1.02817	1.01908	0.926237	0.905043	0.908388	1.07007	1.03089	0.818607	0.596905	0.753338	0.601272	0.882217	0.885466	1.01359	0.959791	1.15554	0.805591	0.94199	0.998317	0.600423
NOC3L_HUMAN	1.46454	1.10499	1.06274	1.42364	1.04643	1.22473	1.02579	1.14477	0.998392	1.01742	0.826456	0.804236	0.840754	0.807804	0.879713	0.942607	1.07926	1.00015	1.48029	0.656241	0.94043	0.933385	0.300794
NOG1_HUMAN	1.00811	1.02284	1.03511	1.06392	0.911269	1.02692	0.978772	0.914909	0.876021	0.629374	0.852181	0.916863	0.977854	1.06386	0.860658	0.99506	0.890972	0.828473	1.27028	0.575033	1.10275	1.06089	0.0865347
NOG2_HUMAN	1.29073	1.04349	1.13274	1.12739	1.15178	1.19496	0.928596	1.01975	1.00627	0.97832	0.907663	0.859813	0.852893	0.50927	0.994271	0.885795	0.855935	0.90261	1.09543	0.885482	0.853628	1.27904	0.364409
NOL11_HUMAN	1.08006	1.11308	0.954752	0.980446	0.919899	0.979804	0.889801	0.887457	1.09083	1.17879	0.975135	0.832356	1.04913	0.890407	0.981375	0.927494	0.919577	0.905374	0.796704	0.838169	0.988296	0.975917	0.322568
NOL6_HUMAN	0.979233	1.05093	1.05345	1.00994	1.09753	1.07352	0.960268	1.06823	0.871035	0.753839	0.817003	0.711792	0.958459	0.710263	1.14534	1.0383	1.27085	1.04373	1.14413	0.699001	1.12604	1.12619	0.700332
NOL9_HUMAN	0.990634	0.904168	0.920425	0.847535	0.976808	1.01953	0.84486	1.06069	0.770391	0.84381	0.830196	0.374153	0.964589	0.820452	1.20776	1.12422	1.17442	1.19865	1.25289	1.02632	1.04093	1.11923	0.591114
NOLC1_HUMAN	1.13313	1.1209	1.23804	1.18727	1.16272	1.17339	1.02381	1.13416	1.21549	1.15526	1.0475	1.12839	1.49723	0.992446	1.04526	0.941364	1.28529	1.05854	0.590585	0.127143	1.17758	1.23779	0.24396
NONO_HUMAN	0.963292	0.978787	0.985451	0.997853	1.03943	1.11153	0.952937	1.06819	1.09812	1.04365	0.949102	0.998827	1.26289	1.14862	1.01454	0.970929	1.01704	0.954302	1.20553	1.26117	1.2046	1.21247	-0.207918
NOP2_HUMAN	0.971832	0.972378	1.27829	0.741868	1.03449	1.19012	1.06082	1.11513	1.02203	0.873274	0.977933	0.766051	1.05879	1.15291	1.03453	1.02612	1.16332	0.983823	0.9906	0.751126	0.847393	0.80693	0.222175
NOP56_HUMAN	1.01011	0.873637	0.980117	0.839346	0.873443	0.937356	0.830552	0.814943	0.98815	0.792766	0.949156	0.682552	0.959921	0.935375	0.935921	0.97699	0.965625	0.857088	0.863057	0.332052	0.960789	1.00028	0.37761
NOP58_HUMAN	1.07025	1.05005	1.0541	0.980282	0.974728	1.00322	0.849608	0.916396	0.97798	0.831481	0.846757	0.651194	0.84006	0.863181	0.918677	0.959999	0.979643	0.890497	1.04778	0.778479	0.971448	1.09232	0.580728
NP1L1_HUMAN	0.948565	0.996214	0.931041	0.915417	0.990874	0.93286	1.0712	0.989904	1.04697	0.981201	0.977751	1.04696	1.0129	1.16557	0.958878	1.02357	0.828042	0.983896	0.814985	0.876932	0.902639	0.902596	-0.208819
NP1L4_HUMAN	0.928813	0.888241	0.884705	0.960879	1.01003	0.928561	0.971131	0.944631	0.967539	0.915503	1.0707	1.1851	0.95098	1.12874	0.942212	1.04612	0.863383	0.978821	0.810984	0.791274	0.932674	1.0233	-0.426967
NPC1_HUMAN	1.12259	1.23629	1.59406	1.03061	0.884046	1.03708	1.17577	0.851291	1.21094	1.33805	1.52233	1.36317	1.62098	2.04285	1.23244	1.14009	1.12845	0.750349	0.656583	1.09739	1.18474	1.07229	-0.453069
NPC2_HUMAN	0.994244	0.991383	1.10414	1.09079	1.07763	1.05906	1.004	1.15911	0.899224	0.804559	0.795259	0.860475	1.04402	1.2175	1.08105	1.09205	0.934461	0.921051	1.2846	1.31729	1.09633	1.20018	0.0357625
NPL4_HUMAN	0.769605	0.893363	0.854549	1.07476	1.04611	1.0735	1.02511	1.10091	1.00609	0.827746	0.952184	0.83453	0.94775	0.733158	1.29379	1.20891	0.72438	0.910158	0.960347	1.05904	0.888452	0.850225	0.328155
NPM_HUMAN	1.00892	1.03668	1.08958	1.06549	1.09945	1.18678	1.02184	1.18792	1.02246	0.994753	0.893904	0.942049	1.33384	1.54836	0.967845	0.923394	0.99381	0.944906	1.24761	1.43116	1.05952	1.12406	-0.342467
NPM3_HUMAN	0.98284	1.129	1.13204	1.10933	1.1644	1.20812	1.02231	1.09583	1.15941	1.03385	1.16416	1.04986	1.01502	1.35412	0.99269	1.02199	1.0102	0.939814	1.18997	1.36632	0.903428	1.08862	-0.551196
NPTN_HUMAN	1.31404	1.31261	1.49015	1.34475	1.03471	1.07946	1.01793	0.994088	1.10697	0.850881	1.01374	0.842909	1.20615	1.19489	0.89692	0.977741	1.14528	0.978318	1.09384	0.906119	0.895256	0.978973	0.170531
NQO1_HUMAN	0.808233	0.977994	0.920245	0.93287	0.992129	1.04569	1.06175	0.9273	1.02469	1.10983	0.975603	1.18284	0.523069	0.413576	0.680077	0.942568	0.479384	0.910933	0.698601	0.679631	1.33371	1.05165	0.0302176
NRBP_HUMAN	1.15599	0.954667	1.17735	1.04447	0.979149	0.917754	0.923801	0.935753	1.19726	1.22499	1.15159	1.23621	0.720223	0.662509	1.00248	1.01433	0.864403	0.951153	0.882799	0.972868	0.878113	0.857454	-0.0856617
NRDC_HUMAN	0.950119	0.994756	0.956415	0.960346	0.960328	0.74556	1.03141	0.905717	0.919414	0.995063	0.935335	0.83004	0.637178	0.4832	0.979384	1.04472	0.821375	0.9942	0.746825	0.765932	0.864294	0.866806	0.554997
NSDHL_HUMAN	1.30168	1.32226	1.19006	1.13144	1.0001	1.04069	1.08864	0.973713	1.19435	1.12295	1.04494	1.15456	1.13371	1.19521	1.17886	1.03923	1.39953	1.20137	1.392	1.0358	0.880725	1.09664	0.0559361
NSF_HUMAN	0.873367	0.90704	0.896963	0.917254	1.01465	0.990419	1.00263	0.971883	0.90174	0.914169	0.973025	0.922402	1.0371	0.940102	1.02202	1.01362	0.998767	0.961643	0.989697	0.828103	1.05123	1.025	0.282559
NSUN2_HUMAN	0.937059	0.973417	0.848906	0.979462	0.94265	0.971579	1.01245	0.958938	1.05944	0.818676	0.710294	0.780535	1.02588	1.07541	0.948675	0.992367	0.890213	0.917352	1.01415	1.17997	0.823891	0.911624	0.227413
NSUN5_HUMAN	0.98822	1.08095	0.999708	1.01055	0.974064	0.881008	0.838386	0.931783	0.862304	0.842074	0.932366	0.804581	0.725514	0.612112	0.882911	1.03799	1.17136	1.01906	0.788306	0.637922	0.701172	0.931359	0.55222
NT5D1_HUMAN	0.912519	0.860818	1.1271	0.924762	1.2957	1.12536	1.21519	0.906661	1.09843	1.12563	1.36578	1.39309	0.800751	0.557806	0.971851	1.01231	1.11812	1.10564	0.949276	0.943722	0.8905	0.784437	-0.148609
NTAL_HUMAN	0.945441	1.03914	1.14945	0.956009	1.15813	1.13933	1.00753	0.884715	1.18353	1.10154	1.08822	1.15559	1.16424	0.961406	1.03734	0.998843	1.0206	1.00454	1.06981	0.827532	1.03184	1.1469	-0.0960506
NTF2_HUMAN	0.997989	0.980384	0.863869	0.963061	0.996922	0.839081	0.966532	0.93198	0.901646	0.758041	0.692228	0.733982	0.73377	0.515376	0.929191	1.02275	0.73591	0.989999	0.705612	0.759501	0.852035	0.820749	0.769374
NTM1A_HUMAN	0.983282	1.57238	1.15919	0.993362	0.92626	0.893055	0.967358	0.787209	1.00435	1.10091	0.975214	1.05557	0.747835	0.660502	0.937257	0.911791	0.722652	0.779384	0.492475	0.623614	0.843649	0.907208	0.187874
NU107_HUMAN	0.990294	1.02442	0.959881	1.01493	1.02902	1.01396	1.01032	0.963307	1.13525	0.958765	1.022	0.912942	1.00264	0.901517	0.964837	1.01364	0.999143	0.956319	1.0179	0.921773	0.896194	0.998423	0.381206
NU133_HUMAN	0.957348	0.968206	0.782337	0.893137	1.05367	1.06188	0.9964	1.02219	1.00324	0.780833	0.911588	0.607295	1.05739	0.721054	1.04604	0.96052	1.07121	0.960498	1.01203	0.982379	1.26339	1.22296	0.586613
NU153_HUMAN	1.25721	1.19979	0.996458	1.23338	1.07077	1.2179	0.994234	1.1735	0.871027	0.802348	0.577465	0.401716	1.29807	1.00136	1.12269	1.03601	1.17682	0.992375	1.29529	1.16565	0.919733	1.07143	0.54553
NU155_HUMAN	0.91891	0.886464	0.888749	0.887053	1.02462	1.03795	0.935442	1.02369	0.989419	1.01176	0.933817	0.743124	1.09642	0.967025	1.05785	1.06444	0.929194	1.01356	1.08546	0.93719	1.00323	1.00367	0.394323
NU160_HUMAN	0.971492	0.95015	0.924635	0.894696	1.06501	1.01128	0.919757	1.07063	1.09619	0.933157	1.07879	0.904946	1.02563	0.986118	1.15191	1.04385	1.1436	1.05476	1.18442	0.944236	1.14475	1.02517	0.256837
NU188_HUMAN	0.954718	1.07706	1.05506	0.942851	0.976977	0.980494	1.02854	0.932381	1.1223	0.957964	0.814986	0.971495	1.03118	0.925387	1.11219	1.18666	1.39504	1.17636	1.38843	1.21101	1.1631	1.1037	0.374789
NU205_HUMAN	1.00439	0.919159	1.02076	1.03188	1.0056	0.987102	0.942979	0.993584	0.958374	1.03331	0.963217	0.822821	1.05664	0.955192	1.04246	1.01603	1.10023	1.09008	1.24841	0.893088	1.03295	0.915454	0.34723
NU214_HUMAN	1.10901	1.03623	1.02429	0.987136	1.02042	1.11593	1.0615	1.11509	1.09542	1.08666	0.913209	0.961765	1.26691	1.06345	1.07727	1.07323	1.01129	1.01658	1.20325	1.10629	0.898384	1.01269	0.136473
NUCB1_HUMAN	1.07416	1.16856	1.13727	1.12022	1.01537	1.07724	1.01498	1.02783	1.04972	0.922274	1.00089	1.05557	1.32417	1.73654	1.01306	0.949287	1.01239	0.912525	1.10169	1.04845	1.06746	1.09109	-0.396726
NUCB2_HUMAN	0.994725	1.08381	1.04161	0.998938	1.09789	1.12107	1.03731	1.14248	0.974327	0.922113	1.06214	1.23635	1.6257	2.18748	1.03001	1.05101	1.07908	0.952059	1.20469	1.48569	1.10693	1.19061	-0.522631
NUCL_HUMAN	0.972198	1.03215	0.994158	1.00716	1.02817	1.10472	0.982097	1.07796	0.925179	0.936595	1.00301	0.948111	1.17163	0.945751	0.973305	0.940337	1.02309	0.946138	1.09135	0.736408	1.03454	1.0918	0.164156
NUDC_HUMAN	1.02095	1.03464	1.08397	1.0378	0.973173	0.942534	1.00446	0.937702	0.919472	0.934257	0.813369	0.787031	0.88217	0.668503	0.905624	1.05309	0.814019	0.974974	0.912535	1.08919	1.11081	0.869183	0.565696
NUDC1_HUMAN	1.10083	0.935504	0.957748	0.912687	0.934545	0.946628	0.957009	0.914422	1.02195	0.800606	1.05174	1.0072	0.867875	0.675103	0.911308	0.958857	1.02514	1.06723	0.848018	0.985962	0.763899	0.806028	0.216103
NUDT5_HUMAN	0.957696	0.993902	0.925822	0.918411	0.913073	0.820854	0.986939	0.921578	0.906843	0.989599	1.04872	0.947099	0.807544	0.573438	0.914844	0.964886	0.901895	1.00435	0.737461	0.968822	0.880472	0.891383	0.307495
NUFP2_HUMAN	0.827025	0.867119	0.928341	0.959744	1.02027	1.04149	1.00574	1.0354	1.05711	0.960153	0.853431	1.11675	0.998321	0.836993	0.965542	1.03692	0.867895	0.961152	1.23926	1.13014	1.04746	1.12473	-0.0888902
NUMA1_HUMAN	1.0812	1.11262	1.18395	1.11791	1.06804	1.1615	0.953819	1.11332	1.13056	0.9105	0.981391	0.808701	1.01122	0.808329	1.03817	0.997136	1.03926	0.972069	0.989736	0.762777	1.06483	1.11226	0.583727
NUP37_HUMAN	1.08764	1.06688	1.04354	1.17285	1.02273	1.05026	0.953816	1.07879	1.043	0.930297	1.12905	1.11349	1.22842	1.22633	1.00756	0.940247	1.07652	0.946659	1.07713	1.14173	0.885081	1.19065	-0.474044
NUP43_HUMAN	0.975621	0.784351	0.833413	0.75023	0.901964	1.1025	0.878797	0.963505	1.18495	1.02993	1.13766	1.0213	1.11868	1.78555	0.956436	0.932864	1.42307	1.24909	1.32893	1.49416	1.02019	1.10378	-0.441103
NUP50_HUMAN	1.05741	1.1013	1.13848	1.08886	1.06454	1.08803	0.989071	1.05969	1.11892	0.997994	1.09276	0.829439	1.00973	0.923009	0.990272	0.928273	0.993483	0.939594	1.09273	1.04444	1.03283	1.19413	0.228507
NUP53_HUMAN	0.885242	0.791408	0.885539	0.724065	0.867201	0.922162	0.869788	0.909445	1.17231	1.21405	1.31112	1.17288	1.46157	1.68604	1.11955	1.1142	0.93412	0.908688	1.17886	1.23611	1.29263	1.34276	-0.529597
NUP62_HUMAN	1.06737	1.12995	1.05016	0.905924	1.11466	1.00464	1.0013	1.16802	1.53226	1.0852	1.19735	0.798825	1.85518	1.90469	1.44808	1.29196	1.06041	1.12091	1.22065	1.42368	1.29769	1.34221	-0.0731472
NUP85_HUMAN	1.04756	1.06763	1.02809	1.00905	0.902807	0.892324	0.955186	0.887791	0.784769	0.857415	0.755642	0.837511	1.0547	0.88502	1.11919	1.11562	1.26122	1.3881	1.11553	1.10864	1.32976	1.06934	0.513905
NUP88_HUMAN	0.964522	0.95275	0.894309	0.801251	1.01648	1.08749	0.9659	1.13721	1.03962	1.06722	0.969904	0.848124	1.16308	1.2636	0.977193	0.950811	1.00594	0.866752	1.04451	0.95566	1.08083	1.09878	-0.134794
NUP93_HUMAN	1.0384	1.05638	1.02298	0.964675	1.01345	1.07976	0.938035	1.03553	0.937328	0.863522	0.962497	0.929873	1.06856	1.10032	1.01594	1.01825	0.994129	1.00608	1.11857	1.01482	1.02646	0.997245	0.0395113
NUP98_HUMAN	0.960942	0.907958	0.882624	0.926487	1.03782	1.08494	0.979526	1.0825	0.861032	0.738362	0.906881	0.722371	1.12108	0.952652	1.04607	0.983221	0.951576	0.944478	1.06416	1.14231	1.2651	1.23784	0.274378
NXF1_HUMAN	0.992599	1.02153	0.818062	0.931863	0.834225	0.909329	0.770542	0.829598	0.890448	0.685274	0.852285	0.697161	0.902242	0.774275	1.0463	1.01794	0.844243	0.915726	0.861654	0.575973	1.18828	1.34647	0.482047
OAS2_HUMAN	0.867052	0.699228	1.08216	0.829049	0.986129	0.962087	0.913479	0.919722	1.0082	1.06557	0.999572	0.983562	0.883565	1.40197	0.855265	0.952018	0.857925	0.945558	0.772694	0.874379	0.883258	0.886123	-0.466322
OAS3_HUMAN	1.05781	0.964143	1.07871	0.835925	0.827215	0.912183	0.872437	0.887803	0.784361	0.652232	0.67891	0.525783	0.692557	0.977989	0.973551	1.00216	0.807303	0.862247	0.631091	0.531878	0.876499	0.802021	0.559917
OAT_HUMAN	1.10534	1.22772	1.01624	1.05859	1.04036	1.12539	0.984349	1.00586	1.28824	1.39411	1.26253	1.27431	1.16954	1.48728	1.12561	1.04878	1.23059	1.07054	1.30856	1.36094	0.98085	1.16217	-0.632184
OCAD1_HUMAN	1.21688	0.981512	1.07848	1.11261	1.10939	1.19957	1.03916	1.11194	1.22684	1.16435	0.968952	1.05561	1.40499	1.52339	1.073	1.01834	1.1316	0.97067	1.13016	1.10622	1.15865	1.16506	-0.258021
ODB2_HUMAN	1.08819	1.23979	0.954344	1.05126	1.04925	1.16645	1.09803	1.01712	1.33341	1.16402	1.13155	1.38017	1.62918	2.14839	1.0717	1.00565	1.24779	0.96114	1.15198	1.35108	1.01023	1.26459	-0.535957
ODBB_HUMAN	0.998069	1.12585	1.3157	0.93365	1.15221	1.16279	1.10803	1.057	1.62538	1.48853	1.5521	1.61958	1.41292	1.61337	0.818725	1.01046	1.17499	1.10949	1.10964	0.985666	1.26674	1.26897	-0.627973
ODO1_HUMAN	1.13508	1.22333	1.01299	1.08772	1.07907	1.14724	1.13001	1.0591	1.4211	1.36873	1.25334	1.36611	1.53657	2.17458	1.12219	1.00774	1.15823	0.981344	0.999636	0.748632	1.06274	1.24003	-0.450931
ODO2_HUMAN	1.21707	1.22242	1.05558	1.22359	1.09725	1.18387	1.08081	1.08188	1.43172	1.38671	1.11132	1.33576	1.64231	2.99011	1.13089	1.00227	1.14047	0.997464	1.17305	1.28688	1.09621	1.27558	-0.504556
ODP2_HUMAN	1.19252	1.2874	1.07898	1.12803	1.0874	1.25127	1.1924	1.11673	1.55509	1.43285	1.19242	1.34266	1.62522	2.01421	1.12637	1.04952	1.13919	1.03949	1.09354	1.24143	1.0626	1.24993	-0.479254
ODPA_HUMAN	1.09601	1.24997	1.0908	1.14409	1.01531	1.15326	1.1197	1.11292	1.29572	1.26657	1.11468	1.23482	1.40381	1.721	1.06149	1.0011	1.22184	1.00781	1.1065	1.26293	1.11818	1.28217	-0.49549
ODPB_HUMAN	1.19843	1.13223	1.07293	1.18276	1.13681	1.26667	1.19172	1.15385	1.58045	1.48441	1.18865	1.41538	1.49589	2.05442	1.13359	1.04727	1.12372	1.00637	1.13332	1.1628	1.1178	1.24272	-0.542007
ODPX_HUMAN	1.21924	1.35089	1.2357	1.22681	1.2121	1.3364	1.16882	1.29649	1.19027	1.49886	1.27044	1.37306	1.47875	2.28034	1.15519	0.986307	1.05295	1.00192	1.12555	1.33626	0.963692	1.12148	-0.616932
OFUT1_HUMAN	0.933002	1.00872	0.891042	1.03269	1.04157	1.07502	1.15927	1.08278	0.868761	1.04978	1.26527	1.18711	1.45712	1.76325	1.26312	1.07363	1.38461	1.1135	1.55157	1.60681	1.35831	1.07064	-0.463057
OGFR_HUMAN	0.918412	0.805701	0.898272	1.01729	1.02639	1.02887	0.967539	0.911419	0.758562	0.834725	0.901866	0.893062	0.946529	0.833839	1.19931	1.00258	0.811259	0.913945	0.811392	0.833347	0.896534	0.967779	0.297982
OGT1_HUMAN	1.04044	1.0369	0.998577	1.08778	1.05437	1.07785	0.993042	1.02733	0.890785	1.0151	0.858425	0.809427	0.995512	0.757468	1.05492	1.04461	1.15857	0.979915	1.10276	0.765373	1.02107	1.12745	0.66818
OLA1_HUMAN	0.978483	0.958369	1.01049	0.970829	1.02211	0.968638	1.02512	0.985715	0.930208	0.861312	0.929651	0.882121	0.774002	0.52808	0.921683	1.01518	0.850155	0.973433	0.795222	0.764993	0.926249	0.914982	0.566081
OPA1_HUMAN	1.08581	1.05781	1.03479	0.984872	1.02814	1.14245	0.971015	1.03505	1.05901	0.985187	0.997253	0.878917	1.24144	1.01074	1.05546	1.02578	1.01304	0.931443	1.05971	0.957904	1.01516	1.1639	0.281544
OS9_HUMAN	0.981741	0.807898	0.979796	1.14272	1.04536	1.12771	1.01178	0.933985	0.957843	0.901091	1.12504	1.3226	1.46577	2.02551	1.23391	1.11549	1.02033	1.00088	1.33878	1.40194	1.22786	1.30246	-0.570627
OSBL8_HUMAN	1.19904	1.06805	1.06419	1.0444	0.947565	1.07346	1.08248	0.897734	1.20245	0.97562	1.02215	1.09653	1.22358	1.17767	1.16166	1.02491	0.989767	0.785493	0.873935	0.658673	0.87853	1.05531	0.0169352
OSBL9_HUMAN	1.0693	1.11559	1.29	0.914133	0.883332	0.716962	0.905593	0.980134	1.18131	1.06515	1.05723	1.48943	0.849448	0.647672	1.0351	0.988277	0.963674	0.975263	0.70688	0.817062	0.859296	0.945286	-0.0213483
OSBP1_HUMAN	0.884411	1.04082	0.893128	0.785573	0.96723	0.917756	1.01312	0.953253	0.940574	0.994062	0.793233	0.829182	0.999787	0.891101	0.932834	0.93529	0.93931	0.858921	1.0306	1.213	0.974651	1.1511	0.206603
OSGEP_HUMAN	0.796772	0.615787	0.915511	0.704471	0.764587	0.809652	0.782063	0.654856	1.06466	0.940882	1.18155	0.837758	1.22442	0.899393	1.49579	1.15105	1.70228	1.52042	1.7164	1.68352	1.24737	0.787448	0.0503101
OST48_HUMAN	1.05123	1.06961	0.980892	0.925894	0.982536	1.06658	1.01581	0.986638	1.06158	1.02416	1.11283	1.13881	1.24429	1.44223	1.0245	0.963394	1.07398	0.833835	1.01768	0.743548	0.894989	1.0672	-0.415215
OSTF1_HUMAN	0.959243	0.973709	0.893288	0.913878	0.961315	0.917489	1.07529	0.909283	0.896139	1.00931	1.04446	1.00372	0.781931	0.650553	0.86878	1.05626	0.840674	0.992427	0.769961	0.910529	0.843896	0.842332	0.169256
OTUB1_HUMAN	0.970289	0.90659	0.957174	0.977784	0.964074	0.84354	1.0144	0.93406	0.886048	0.917092	1.00279	0.937699	0.745298	0.580886	0.915214	1.01182	0.821698	0.992999	0.697584	0.86646	0.855206	0.877539	0.36087
OXLA_HUMAN	0.94083	1.07639	0.977749	1.01016	0.944757	1.08029	0.888198	1.04408	0.940414	0.93467	1.0073	1.22719	1.49368	1.4943	1.17916	1.13408	1.06248	1.03465	2.06603	2.05151	0.983246	1.03231	-0.380972
P3H1_HUMAN	0.987603	0.983994	1.01374	0.968691	0.969735	0.978011	0.921808	0.996964	0.908335	0.856347	1.02848	1.15109	1.25792	1.65465	1.04278	1.01285	1.03628	0.955628	1.19649	1.20164	1.15106	1.16458	-0.522762
P4HA1_HUMAN	0.958973	1.10182	1.05079	1.05451	1.01419	1.1075	0.950291	1.03231	1.20081	0.938997	1.15349	1.16523	1.24244	1.85199	1.0719	1.03314	1.04362	0.93219	1.38812	1.3425	1.1263	1.22381	-0.587919
P4K2A_HUMAN	1.01546	1.13022	0.752202	0.862793	0.882754	0.972331	1.06084	0.853188	1.01141	0.796481	0.983884	0.983931	1.12455	1.16052	1.0342	0.94776	0.980549	1.06647	1.03883	0.836529	0.941636	0.953322	-0.00502423
P4R3A_HUMAN	1.01635	0.964154	1.04011	1.04268	0.940178	0.889723	0.914463	0.887547	0.96621	0.947708	1.03865	1.13707	0.920284	0.714445	1.06491	0.973286	0.998225	0.934489	1.0759	1.0351	0.985303	1.1784	0.0133631
P5CR2_HUMAN	1.19518	1.19428	1.01604	1.05695	1.01173	1.04485	1.0732	1.00773	1.08301	1.21512	1.14742	1.15701	1.33059	1.78786	1.1323	1.08799	1.17515	1.03647	0.972176	0.984572	1.08067	1.14005	-0.389812
P5CS_HUMAN	1.15031	1.23	1.01558	1.08415	1.04445	1.17757	1.11603	1.08894	1.32618	1.3837	1.28319	1.18985	1.4429	1.3894	1.21005	1.07288	1.19189	1.0582	1.05345	0.904342	1.15881	1.37258	-0.233869
P66B_HUMAN	1.13247	1.30192	1.22692	1.3409	1.11008	1.11375	0.882803	1.05196	1.10548	0.774421	0.977857	0.633999	1.22509	1.18016	1.09017	1.00772	0.863478	0.802758	1.10711	1.03044	1.11394	1.04243	0.24244
P85A_HUMAN	1.24965	1.03357	0.905078	1.07223	0.847673	0.855467	1.0097	0.97634	0.877925	1.23842	1.28688	1.09761	1.23825	1.27306	1.10851	1.08926	0.869758	1.01294	0.661004	0.988954	1.07176	0.998168	-0.279573
PA1B2_HUMAN	1.14665	0.989641	1.04807	0.996349	0.937164	0.764744	0.888978	0.828716	0.910019	0.988795	0.922471	1.09597	0.794736	0.445537	0.897558	1.00712	0.942748	0.987801	0.776417	1.06435	0.856251	0.931645	0.274842
PA1B3_HUMAN	1.13306	1.15886	1.11586	0.863108	1.11153	0.993835	0.941329	0.918651	0.770148	0.913732	0.954004	0.993367	1.2639	0.515371	1.00421	1.30054	0.873009	1.06922	0.821413	1.00202	0.912388	0.827097	0.415841
PA2G4_HUMAN	0.948806	0.963558	0.929971	0.929062	0.964845	0.935681	1.01572	0.992075	0.848234	0.934229	0.841234	0.86097	0.90388	0.634736	1.01423	1.04261	0.890612	0.953342	0.784456	0.943666	0.9837	0.936178	0.695334
PABP1_HUMAN	0.97855	0.999148	0.993058	0.967533	1.05293	1.01586	1.02435	1.01094	0.957732	0.922307	1.05633	1.05578	0.848302	0.848468	0.994358	0.99773	0.92396	1.00642	1.00151	1.17905	1.02203	1.063	-0.0974721
PABP2_HUMAN	1.03723	1.08061	0.922341	0.933075	1.15396	1.10387	0.987775	1.16495	1.12822	1.00625	1.11373	1.09495	1.24037	1.12374	1.12778	1.01708	1.0269	0.963691	1.13169	1.14631	1.18142	1.22264	-0.216366
PABP4_HUMAN	0.999132	0.995917	0.956424	1.00543	1.05892	1.03869	0.996763	1.013	1.00992	0.971935	0.997281	0.997411	0.911449	0.901281	0.993114	1.01303	0.954334	1.00611	1.03688	1.34448	1.01294	1.04204	-0.0697524
PACN2_HUMAN	1.02475	0.944885	1.12146	1.06949	0.99705	1.03555	1.00147	1.02977	1.01628	0.964983	1.07566	0.899603	0.824526	0.788402	0.871799	0.973977	0.824439	0.932092	0.731258	0.80051	0.956804	0.862733	0.192977
PAF1_HUMAN	0.950846	0.936722	0.793064	0.857899	1.02734	1.02405	0.953583	0.900622	1.17839	1.14072	1.07069	1.29077	1.10542	1.37497	0.949137	0.950555	0.983131	0.966626	1.06924	1.07919	1.19333	1.12941	-0.633218
PAIRB_HUMAN	1.04456	1.05967	1.1235	1.07884	1.03568	1.02814	1.11469	1.1115	0.878709	0.822257	0.939525	0.952666	0.904919	0.928789	1.05936	1.12417	0.918547	1.04161	0.888281	0.894287	0.893535	1.01711	0.430816
PAK2_HUMAN	0.9557	0.91719	0.975923	0.95498	1.00302	0.936095	1.05184	0.964457	0.951181	1.02423	0.930348	0.901361	0.755691	0.507247	0.896807	0.997811	0.839576	1.01552	0.742493	0.833398	0.874152	0.890557	0.472001
PAPOA_HUMAN	0.923058	0.888223	0.970299	0.81366	0.978702	0.854534	0.892387	0.910509	0.982951	0.99384	0.935487	1.06964	0.611254	0.629266	0.944188	1.03692	0.844056	0.733923	0.88309	1.14307	0.758918	0.832372	-0.0310283
PAPS1_HUMAN	0.84065	0.836376	0.84841	0.826629	0.962018	0.865583	0.828702	0.802526	0.824363	0.800601	0.813231	0.737604	0.728099	0.741273	0.861939	0.822794	0.895017	0.786982	0.530221	0.852094	0.961614	0.970981	0.415945
PARK7_HUMAN	0.931044	0.939544	1.03917	0.989468	1.06209	0.98919	1.06985	1.05004	0.90612	0.936929	0.94937	0.910456	0.810558	0.53455	0.944095	1.0072	0.820968	0.929919	0.713223	0.816323	0.88851	0.823426	0.444418
PARN_HUMAN	1.19695	0.83233	0.827321	0.904291	0.911755	0.906579	0.862281	0.930698	1.11602	0.887289	0.973991	1.09613	1.1878	0.835415	0.828872	1.03922	1.19742	1.03692	1.00516	0.984583	1.1578	1.21528	0.112434
PARP1_HUMAN	0.923007	0.883499	0.88601	0.861848	0.926515	0.952008	0.820691	0.810227	0.774258	0.624217	0.651922	0.608059	0.819252	0.894696	0.854628	0.861986	0.885219	0.81554	0.490537	0.376758	0.774233	0.914222	0.514485
PARP9_HUMAN	1.08886	0.968202	1.07809	0.925794	0.775698	0.887357	1.02364	0.747893	1.03526	1.14878	1.15311	0.856707	1.05559	1.45905	1.33448	1.26466	0.96378	1.26442	1.22973	0.949178	0.948101	0.843118	-0.0781623
PARVG_HUMAN	0.906705	0.954958	0.935645	0.99429	0.970958	0.794349	1.01084	0.89956	0.770369	1.34169	1.14785	1.48623	0.9954	0.903343	1.03125	1.07251	0.949817	1.12853	0.812548	0.73201	0.920725	0.965057	-0.307245
PAXI_HUMAN	0.918791	0.808627	1.23023	0.99985	1.1333	1.28342	1.30085	1.02704	1.02953	1.14825	0.915883	0.871438	0.637367	0.501384	0.977799	0.996127	0.77743	0.948893	0.768379	0.648465	0.93356	0.901285	0.327678
PBDC1_HUMAN	0.991553	0.951801	0.955156	1.03336	0.937473	0.874172	0.90699	0.971229	1.00836	1.02601	1.15217	1.09912	0.77457	0.68645	0.977437	1.09312	0.715988	0.928206	0.77831	0.943014	0.995483	1.03196	-0.0286537
PCAT2_HUMAN	1.05326	0.985458	1.04668	0.998302	0.997804	1.05246	0.955656	0.956581	0.93802	0.806689	0.726197	0.850839	1.11597	1.31609	1.18117	1.19999	1.00641	0.875456	0.985101	0.738212	0.940778	1.09235	0.277524
PCBP1_HUMAN	0.877727	0.92029	0.907373	0.931967	0.964567	0.917076	0.960443	0.958302	1.05636	1.06964	0.895604	0.868306	0.837144	0.872561	0.871385	0.951186	0.826155	1.04336	0.840666	0.905286	0.929168	0.920847	0.279243
PCBP2_HUMAN	0.922046	0.90143	0.966501	0.958821	0.985638	0.963674	0.982909	0.984337	0.898219	1.0317	0.92326	0.844111	0.981823	0.899278	0.952736	1.01129	0.888107	0.991618	0.837346	0.984462	0.902738	0.86733	0.358271
PCCA_HUMAN	1.03978	1.1419	1.02839	0.861623	1.08463	1.02527	1.02225	0.921468	1.31458	1.16027	0.96383	1.24783	1.57442	2.4974	1.06824	0.829311	0.926045	1.15211	1.44011	1.16952	0.918529	0.873778	-0.48584
PCKGM_HUMAN	1.09513	1.22274	0.901069	1.08584	1.11922	1.15547	1.15845	1.15375	1.32548	1.18922	1.07891	1.22492	1.52438	1.70741	1.31483	1.06667	1.12971	1.02114	1.11953	1.13245	1.19764	1.23657	-0.303335
PCM1_HUMAN	0.934527	0.936161	0.964429	0.935426	0.974252	0.942042	0.991045	1.00273	0.848184	0.759637	0.673224	0.595802	0.893732	0.985713	0.940028	0.994977	0.791574	0.968294	0.793277	0.835861	0.932889	0.984417	0.634664
PCNA_HUMAN	0.844483	0.891508	0.935264	0.939106	0.914185	0.898865	0.93491	0.965285	0.800901	0.718452	0.836424	0.785004	0.595856	0.554944	0.924686	0.958731	0.769309	0.924721	0.870872	0.932657	0.907905	1.00101	0.457167
PCNP_HUMAN	1.09322	1.16837	1.2	1.34709	1.03031	1.01658	0.825158	0.984459	0.799675	0.804376	0.81527	0.805083	0.860803	0.436227	0.857566	0.939567	0.81482	0.834599	0.788283	0.900042	1.22109	0.8839	0.438547
PCP_HUMAN	0.987854	1.2147	0.983375	0.970169	0.872249	0.953621	1.08383	0.969246	0.922304	0.851529	1.28696	1.37227	1.23392	1.59136	0.944722	0.930623	1.08238	1.17541	1.23668	1.46011	1.09846	1.29639	-0.646059
PCY1A_HUMAN	1.05771	1.01451	1.0206	1.02569	0.901991	0.919109	1.11025	0.903486	1.0255	1.30992	1.21813	1.37407	0.734702	0.622631	0.82282	0.761239	1.00277	1.0255	0.974473	1.42889	0.929088	0.915396	-0.351188
PCYOX_HUMAN	1.0483	1.08046	0.999094	0.883066	1.04539	1.03734	0.800141	0.810272	0.903992	0.710236	1.02736	0.888086	1.21095	1.73127	1.03589	1.02519	1.21941	1.10942	1.03703	0.852281	1.07705	1.09862	-0.168134
PCYXL_HUMAN	0.995192	1.04694	0.85128	0.763819	1.02816	0.907517	0.947462	0.915376	0.838173	1.04132	0.969783	1.01073	1.17114	1.33516	1.04539	1.04992	1.22212	0.905125	0.974277	0.830694	1.07366	1.19436	-0.102267
PDC10_HUMAN	0.91711	0.900405	0.772216	0.731852	0.977832	0.909657	0.947508	0.956162	0.860031	0.854867	0.902183	0.926942	0.648093	0.455755	0.90169	1.10457	1.09697	1.20425	0.800308	1.16486	0.929412	0.867776	0.380504
PDC6I_HUMAN	0.955822	0.906428	0.989416	0.970607	1.0289	1.0169	0.999063	0.992923	1.10198	1.07611	1.06477	1.08834	0.848755	0.922359	0.911424	0.994816	0.834154	0.956199	0.752558	0.848402	0.920157	0.912544	-0.172507
PDCD5_HUMAN	0.843437	0.842674	0.887531	0.895704	1.04934	1.01016	1.0669	1.04007	0.821067	0.801765	0.779725	0.789371	0.785191	0.464538	0.981049	1.01238	0.88515	0.976943	0.859765	1.07467	0.880659	0.904021	0.549666
PDCD6_HUMAN	0.944441	0.937034	0.932056	0.917101	0.855222	0.907574	1.04366	0.928358	1.02845	0.931715	0.885008	1.25351	1.15754	1.69797	0.855419	0.9018	0.886326	0.928403	0.961513	1.47103	0.910822	0.942819	-0.58812
PDE12_HUMAN	1.47092	0.998831	0.938486	1.11138	1.17235	0.940592	0.899346	0.893819	1.02404	1.15983	1.10188	1.04024	0.978071	0.974198	1.105	1.11751	1.00803	1.04621	0.868038	0.846523	0.92278	0.968741	0.149375
PDIA1_HUMAN	1.00122	1.03201	1.03606	1.04716	1.01441	1.068	0.969971	1.03419	0.923977	0.853291	0.973632	1.06226	1.41718	1.86883	1.09465	1.02279	1.06968	0.96862	1.26446	1.31356	1.16094	1.12907	-0.419176
PDIA3_HUMAN	1.00483	1.04918	1.02705	1.03873	1.02995	1.07169	0.960947	1.05397	0.926212	0.866132	0.952227	1.07656	1.39225	1.81057	1.04736	0.988507	1.03724	0.95439	1.24382	1.32614	1.12734	1.14879	-0.441626
PDIA4_HUMAN	0.973834	1.0267	0.992385	1.00314	1.032	1.07306	0.952659	1.07257	0.920812	0.798166	0.936504	1.02158	1.48008	1.9866	1.07176	1.01528	1.03738	0.953253	1.24529	1.30779	1.14451	1.19209	-0.384662
PDIA5_HUMAN	0.840501	0.869344	0.958567	0.909118	1.05724	1.02514	0.953079	1.06885	0.988152	0.797761	1.00614	1.22284	1.20956	1.71964	1.05895	0.975261	1.11312	0.916545	1.22256	1.0157	1.03773	1.05451	-0.526256
PDIA6_HUMAN	0.957912	1.03577	1.01279	0.996829	1.0283	1.09032	0.964004	1.06198	0.998482	0.878216	1.0692	1.17013	1.3909	1.95683	1.03275	1.02297	1.04561	1.00107	1.2293	1.28274	1.04756	1.1499	-0.547363
PDIP2_HUMAN	1.32797	1.33146	1.1134	1.15801	1.07022	0.977799	1.15947	1.10281	1.4233	1.22722	1.33654	1.49221	1.37165	1.86947	0.925273	0.873862	1.16086	0.99201	0.903209	0.883966	1.05443	1.19443	-0.505639
PDIP3_HUMAN	1.08913	1.10793	1.15652	1.10728	1.02179	1.25005	1.04237	1.13848	0.923018	0.776758	0.842907	0.708826	1.05033	1.17964	1.14153	1.10232	1.09261	0.948636	0.804847	0.618052	0.890033	1.11543	0.440564
PDLI1_HUMAN	0.859289	0.981588	0.83788	0.878044	0.951301	1.0414	0.972529	1.07156	0.860538	0.808282	0.747576	0.763358	0.844214	0.591898	0.938896	0.994232	0.820196	0.970807	0.843422	0.947628	1.04326	1.00747	0.636727
PDLI4_HUMAN	0.934242	0.97959	1.25796	1.20896	0.939164	1.06047	1.18596	1.06776	1.25222	1.19969	1.03431	1.09927	0.640275	0.647382	0.852772	0.635805	0.84236	1.21487	1.03127	1.42588	0.899464	0.743263	-0.106828
PDLI5_HUMAN	0.930981	0.918786	1.0238	1.00393	0.961239	1.02428	0.970278	1.00464	1.32711	1.26109	0.747399	0.800481	0.727501	0.539692	0.879612	0.965782	0.835297	0.968999	0.860721	0.863834	0.972078	0.926995	0.459161
PDLI7_HUMAN	0.898874	0.967726	0.974759	0.982822	0.992121	0.989571	1.0066	0.970298	1.04481	0.98393	0.965161	0.865468	0.660309	0.413972	0.794418	0.86602	0.852488	0.901312	0.919085	1.40466	0.891473	0.950941	0.142948
PDP1_HUMAN	1.28841	1.48689	1.26217	1.22842	1.19603	0.8111	1.14165	1.07615	1.4778	1.47138	1.07233	2.12171	1.50599	2.20427	0.957889	0.776661	1.05833	1.08859	0.936577	0.849552	0.962531	1.19133	-0.526113
PDS5A_HUMAN	1.00999	1.01584	0.902544	1.06048	0.941009	0.950682	0.993609	0.960876	0.80443	0.844722	0.81762	0.66354	0.547571	0.719911	0.966566	0.843796	1.22817	1.05151	0.981969	0.522758	0.782223	0.844248	0.534216
PDXK_HUMAN	0.926896	0.793037	0.890986	0.855273	0.942573	0.855202	0.996957	0.913288	1.0561	1.22671	1.19634	1.07953	0.784434	0.500014	1.10361	1.04785	0.92022	1.10741	0.830387	0.990286	1.08971	0.844259	0.110552
PEA15_HUMAN	0.917721	0.906582	0.88636	0.933484	1.01742	0.968618	1.12779	1.07399	1.13764	1.36783	1.38012	1.52038	0.742824	0.41487	0.977081	0.98582	0.947475	1.14482	0.894979	1.0865	0.861611	0.776109	-0.216328
PEBB_HUMAN	0.919793	0.974407	1.04277	0.967128	1.02142	1.02859	0.963202	1.04638	0.94476	0.855809	1.00924	0.863952	0.886526	0.749572	0.977248	0.826553	0.919484	0.993185	0.935446	1.00671	1.03056	1.16478	0.280287
PEBP1_HUMAN	0.86636	0.887256	0.886013	0.847222	0.921143	0.865519	1.01958	0.956524	0.918402	0.841406	0.898288	0.882226	0.729164	0.464345	0.902945	1.01429	0.77551	0.988125	0.661392	0.807301	0.800215	0.768463	0.489741
PECA1_HUMAN	1.01221	1.11992	1.04522	1.1156	1.19013	1.2554	1.04702	1.08616	1.19976	0.999514	1.14669	1.12639	1.11213	0.87616	1.00324	0.975571	1.03548	0.988196	1.0777	0.832437	0.998247	1.05903	0.00999439
PEF1_HUMAN	0.98539	1.01166	1.09616	0.969361	1.13247	1.03431	0.954278	0.763969	0.917643	1.02841	1.1813	1.30744	0.987543	1.48324	0.899005	0.919347	0.749468	1.01695	0.760315	1.27271	0.866873	0.750969	-0.681942
PELP1_HUMAN	1.04329	1.17209	1.29166	1.01667	1.01706	0.969312	1.0834	0.999002	0.985718	1.26373	0.883332	1.03922	0.986934	0.916939	1.00574	0.989849	1.12465	1.02191	1.39217	1.23023	1.00853	0.998065	0.0458445
PEPD_HUMAN	0.931807	0.890359	0.954543	0.898389	0.996532	0.944064	0.972792	1.00753	0.951456	0.953749	0.889165	0.75354	0.720157	0.615073	0.916322	1.04705	0.828963	1.00273	0.8557	0.99126	0.823265	0.742645	0.5034
PESC_HUMAN	1.0516	1.02439	0.969814	0.850452	1.04047	1.10621	0.968426	1.0476	0.981203	0.663609	0.835562	0.764337	0.95295	0.909318	1.13666	1.06634	1.01742	0.920686	0.952562	0.595558	0.977154	1.04475	0.599835
PFD1_HUMAN	1.36112	0.852304	1.06976	1.26809	1.00829	0.88434	0.93585	0.898612	0.992924	0.834763	0.870079	0.421258	0.776297	0.704033	0.936646	0.98884	0.799002	1.00133	0.522023	0.792263	0.93227	0.84424	0.590921
PFD2_HUMAN	0.869242	0.819368	0.714493	0.818203	1.07017	1.03897	1.04747	1.00844	0.964918	0.998856	0.985188	0.958556	0.707859	0.56831	0.909836	1.01976	0.76482	0.961566	0.700433	0.777622	0.90277	0.850624	0.228116
PFD3_HUMAN	0.824689	0.816877	0.842911	0.888803	1.07712	1.03051	1.12057	1.09797	0.931399	0.936575	0.92911	0.814815	0.931504	0.594961	1.00263	1.03664	0.825909	0.943078	0.762433	0.906971	1.02233	0.931741	0.481453
PFD4_HUMAN	0.994082	0.737298	1.12186	1.38041	1.21401	0.983969	1.08231	0.9215	1.10049	1.044	1.211	1.1566	0.890425	0.864511	1.0755	0.914668	1.17338	1.02858	0.943195	1.02689	1.07333	1.0675	-0.102418
PFD5_HUMAN	1.12771	1.04674	1.04552	0.973308	1.03103	0.908286	0.966812	0.973487	0.989944	0.933747	1.00307	0.980071	0.736874	0.636675	0.924949	0.990614	0.833817	0.900981	0.744375	0.7946	0.957328	0.906087	0.354403
PFD6_HUMAN	0.731516	0.750417	0.798034	0.765913	0.941751	0.988135	1.04139	0.967863	0.950796	0.963919	0.977132	0.987072	0.732546	0.695735	0.912368	0.962844	0.717822	0.974313	0.678827	0.919162	0.938507	0.978041	0.0183386
PFKAL_HUMAN	0.935852	0.930147	0.981918	0.874782	0.975344	0.892047	1.0009	0.880069	0.860613	0.79776	0.931225	0.845974	0.803281	0.873514	0.944579	1.03485	0.846266	1.00671	0.750579	0.663376	0.879038	0.834255	0.437296
PFKAP_HUMAN	0.856728	0.86523	0.847327	0.831079	0.935467	0.856818	0.934535	0.836417	0.84566	0.805057	0.783265	0.784969	0.672669	0.674733	0.891497	0.966176	0.799231	0.982004	0.585927	0.470842	0.813471	0.793746	0.559708
PGAM1_HUMAN	0.933195	0.905009	0.903463	0.937574	0.934055	0.84977	0.966314	0.913022	0.905048	0.773466	0.875831	0.824659	0.724544	0.402052	0.920566	1.04494	0.811214	0.981262	0.735402	0.796248	0.910957	0.890251	0.635723
PGAM5_HUMAN	0.980554	1.00605	0.984496	0.998309	1.17503	1.23579	1.18192	1.1855	1.02192	0.902446	0.975199	0.94525	1.24461	1.56317	0.996122	0.9662	0.933369	0.942245	1.03691	0.919725	1.1728	1.32337	-0.201917
PGES2_HUMAN	1.25832	1.2156	1.13081	1.12233	0.886394	1.121	0.99068	1.00382	1.04919	0.985193	1.10519	1.2729	1.08813	1.43477	0.964535	0.787349	1.01815	0.89774	1.02788	0.930723	1.19631	1.47313	-0.431239
PGH1_HUMAN	1.02364	0.990378	1.01399	1.01346	1.01397	0.983367	0.969581	0.973827	0.952189	0.904697	0.989638	0.983198	1.07603	1.28614	1.00412	0.962796	0.998075	0.878097	0.823125	0.602135	1.06855	1.06158	-0.0485982
PGK1_HUMAN	0.971386	0.926545	0.970019	0.95803	0.989242	0.897744	0.972696	0.937769	0.964585	0.919754	0.870074	0.935219	0.71308	0.414252	0.882498	0.972128	0.783961	0.914421	0.697154	0.739726	0.872059	0.849119	0.481348
PGM2_HUMAN	0.939952	0.89597	0.984873	0.938506	1.01016	0.908337	0.964265	0.927955	0.806031	0.7798	0.8377	0.712092	0.741134	0.419179	0.923939	1.00042	0.812261	0.904737	0.71302	0.657697	0.934143	0.881683	0.694417
PGPI_HUMAN	0.958687	0.925363	0.906832	0.912323	0.953137	1.06608	0.954336	1.00849	1.17525	0.890967	1.23178	1.09872	0.847848	0.802553	1.05747	1.03849	0.771787	0.93345	0.518831	0.553349	0.826319	0.73705	0.0197184
PGRC1_HUMAN	1.04728	1.22643	0.971268	1.02892	0.961705	0.976857	0.926995	1.04366	0.91341	1.17	0.966877	0.975004	1.04556	1.16036	0.927219	1.03326	1.25209	0.946445	1.28351	1.16016	1.0559	1.28313	-0.10488
PGTA_HUMAN	0.788279	0.894722	0.820415	0.859736	0.861655	0.896559	1.06896	1.0991	0.684529	0.650575	0.90063	0.880604	0.790063	0.628058	1.02727	0.908935	0.752547	1.13762	0.683847	0.694369	0.799334	0.776831	0.367039
PHB_HUMAN	1.05442	1.03473	1.10006	1.06829	0.98814	1.06097	0.907274	1.05203	1.00432	1.04091	1.09645	1.19035	1.44689	2.02566	1.06949	1.03404	1.04321	0.988507	1.19139	1.30752	1.1064	1.1541	-0.566928
PHB2_HUMAN	0.999112	0.962557	0.927912	0.94795	1.01571	1.06381	0.915142	0.977374	0.96614	0.963154	1.06659	1.10773	1.4023	2.26253	1.04313	0.9587	1.00075	0.908428	1.15694	1.38348	1.12941	1.16311	-0.543853
PHF5A_HUMAN	1.05091	1.04217	1.13334	1.11117	1.00028	1.1427	0.922784	1.0281	1.04839	0.978491	0.868299	0.683434	1.20882	1.44631	1.02316	1.01948	0.897922	0.884906	1.26205	1.2883	1.22301	1.10805	-0.0670748
PHIP_HUMAN	1.47797	1.40573	1.78673	1.22734	1.32541	1.2406	0.954951	1.15221	1.00521	0.894161	0.84779	0.820205	0.977575	0.790829	1.02157	1.02169	1.05235	0.904824	0.648393	0.300241	1.07364	1.07312	0.440622
PHP14_HUMAN	0.9678	0.780121	0.911141	0.835544	1.14248	1.13553	1.05047	1.03566	1.30931	1.30806	1.34971	1.3201	0.653011	0.693022	0.638016	0.846145	0.700765	1.0098	0.584908	0.735072	0.715913	0.875641	-0.290004
PI42A_HUMAN	1.12459	0.864061	0.905929	1.06354	0.875543	0.91373	1.05239	0.983927	1.08089	1.01936	1.28502	1.27432	0.984002	0.950491	1.00483	1.02878	1.01697	1.10388	0.986059	0.876063	0.920438	0.985511	-0.370159
PI4KA_HUMAN	1.04574	0.980959	1.0861	0.910823	1.10347	0.934243	1.0835	0.924544	0.979795	1.02846	1.16228	0.905088	1.24504	1.22756	1.45114	1.30375	1.07907	1.0383	0.902736	0.33451	0.997956	0.931905	0.247594
PICAL_HUMAN	0.999215	0.995812	1.01207	0.935069	1.10342	1.08581	1.18303	1.15804	0.869201	0.92057	1.02703	0.824589	0.687576	0.339213	0.981842	0.963977	0.962999	1.07226	0.762163	0.640852	0.858694	0.943836	0.514908
PIGS_HUMAN	1.26803	1.00399	1.01635	0.965821	1.06233	0.983539	1.00403	0.973744	1.25674	1.03288	1.05129	0.928602	1.20146	0.992108	1.1386	0.962944	1.17736	0.998126	0.966951	0.872438	0.930656	0.86897	0.333934
PIMT_HUMAN	0.879908	0.918204	0.928287	0.827233	0.974816	0.966307	1.02526	1.0326	1.02695	1.00557	0.8721	0.96886	0.889109	0.737713	0.958081	0.998383	0.8273	0.972922	0.775834	0.937391	0.879645	0.841003	0.338775
PININ_HUMAN	0.99304	1.05198	1.12033	1.07822	1.03191	1.12968	0.91411	1.10198	1.03675	0.976788	1.07569	1.12593	1.31276	1.58391	1.02545	1.00089	1.05558	1.03549	1.24813	1.00178	1.27142	1.28749	-0.446261
PINLY_HUMAN	1.0223	1.04673	1.12051	1.08132	1.06468	1.2211	1.00708	1.14021	0.987097	0.882258	0.792069	0.722821	1.32135	1.09432	0.961625	0.955259	1.0683	0.956596	1.36571	1.51938	1.10586	1.09569	0.0957757
PIPNB_HUMAN	0.972557	0.901931	1.06322	1.0003	1.00842	0.888632	1.00733	0.937315	0.819624	0.793745	0.867325	0.736604	0.680046	0.471768	0.924529	0.947704	0.827953	0.934306	0.669852	0.5827	0.767258	0.90317	0.604207
PKHO2_HUMAN	0.919244	0.852491	1.02845	0.948609	0.927037	0.964649	0.962748	0.946547	1.17409	1.03349	1.28198	1.2504	0.806691	0.876951	0.87006	0.893557	0.797717	0.878825	0.841911	1.13247	0.860482	0.920365	-0.573519
PKN1_HUMAN	1.02449	0.977805	1.09217	0.969939	0.912058	0.823933	0.950565	0.871019	1.03306	1.06	1.18221	1.0317	0.656867	0.513946	0.880399	1.00117	0.823915	1.00198	0.628643	0.51185	0.824329	0.845449	0.190088
PLAP_HUMAN	1.00395	0.917093	1.47943	1.03461	1.0363	0.990623	1.11646	1.10306	1.04151	0.932317	1.22949	1.04317	0.687067	0.660995	0.922186	1.00228	0.943306	0.992269	0.621662	0.521203	0.875013	0.952254	0.164574
PLBL2_HUMAN	1.14162	1.05348	0.997982	1.08603	1.13979	0.984001	1.03115	1.00406	1.00005	1.00048	0.916195	1.22117	1.03689	1.4566	1.05283	1.00621	1.09095	0.869827	1.06822	1.1173	1.02732	1.11514	-0.448596
PLCB2_HUMAN	0.945459	1.10241	1.06647	0.827221	0.947869	0.985427	0.911708	0.955317	0.97806	0.747115	1.03068	0.941938	0.616034	0.450598	0.87048	1.04133	0.786507	0.836101	0.616223	0.490072	0.943974	0.98323	0.362202
PLCB3_HUMAN	1.0195	0.813335	0.962494	0.891456	1.14598	0.998417	1.24777	1.06448	0.961307	1.0781	1.09523	0.823325	0.557658	0.517733	0.961169	0.953468	0.870014	1.11527	0.718727	0.8502	0.868749	0.939032	0.333881
PLCG2_HUMAN	1.04619	0.920823	0.844757	0.931964	0.915108	0.813076	0.859568	0.776871	0.733661	0.811391	0.781899	0.813737	0.71919	0.761271	0.98047	1.06134	0.817174	1.01941	0.735955	0.735076	0.878527	0.914716	0.56249
PLD3_HUMAN	0.978794	1.06647	0.99747	1.0549	0.984952	1.00225	0.887379	0.924997	0.896063	0.895526	0.957327	1.08439	1.54828	1.98343	1.12289	1.10236	1.07416	1.15116	1.11542	1.14072	1.05191	1.12509	-0.344864
PLEC_HUMAN	0.810325	0.898587	0.837852	0.908032	0.906054	0.914456	0.905492	0.892017	0.833149	0.781557	0.874449	0.886045	0.860785	0.698811	0.910176	0.929609	0.944349	0.935657	0.966393	0.766463	0.923494	0.979397	0.454145
PLEK_HUMAN	1.08732	1.15892	1.00235	1.03998	0.9991	1.05136	0.97893	0.965289	1.21571	1.3613	1.18144	1.30181	1.37617	1.01758	0.973773	0.944334	0.963732	1.03852	1.08519	1.43769	0.977082	0.963126	-0.458752
PLIN2_HUMAN	0.942386	1.16393	1.0181	0.886032	1.00387	1.06592	0.943361	1.08089	1.13492	1.08587	1.32136	1.53499	0.805099	1.01989	0.827332	0.920162	0.776307	0.915357	1.19977	1.87663	0.866395	1.04753	-0.622437
PLIN3_HUMAN	0.954873	0.871424	0.95443	0.902994	0.981278	0.889329	0.965356	0.931831	0.962171	0.886192	0.937351	0.796153	0.722346	0.507945	0.909308	0.980562	0.822068	0.98946	0.75588	0.832902	0.922935	0.845382	0.576511
PLOD1_HUMAN	1.03488	1.05218	0.989036	0.96637	0.925518	0.997701	0.912512	0.983317	0.939394	0.813241	1.00974	1.08021	1.22369	1.58479	1.07073	1.02478	1.11632	0.995995	1.11792	0.99595	1.155	1.22335	-0.33213
PLOD3_HUMAN	1.0538	1.06925	1.05381	1.07154	0.99909	1.09382	0.928444	1.01764	0.965513	0.995348	1.07347	1.19856	1.28627	1.76332	1.0677	1.01643	1.10138	1.01578	1.23632	1.11775	1.18522	1.21754	-0.554996
PLRG1_HUMAN	0.919287	0.966047	0.899365	0.872014	1.03989	1.08727	0.97302	1.03288	1.05255	0.962939	1.01355	1.14698	1.01493	1.08843	1.05111	1.01382	1.02344	1.0433	1.08464	1.06568	1.02296	1.16543	-0.385782
PLRKT_HUMAN	1.05381	1.12161	1.72399	1.23051	1.079	1.3474	0.942471	1.19179	1.14227	0.897691	0.857211	1.17503	1.17113	1.41377	0.942283	0.978076	0.975956	0.956101	1.11503	0.898831	1.13192	1.21551	-0.158075
PLSL_HUMAN	0.934509	0.870437	0.966039	0.96655	1.0091	0.92637	1.04241	0.948982	0.913743	0.881316	0.927524	0.818492	0.713331	0.418535	0.924031	1.01477	0.819783	1.02396	0.756737	0.695828	0.910108	0.859891	0.576417
PLXB2_HUMAN	1.13517	1.10652	1.07685	1.10224	1.01222	1.02057	1.07822	1.00043	0.994431	1.02602	1.0514	1.00862	1.07303	1.02413	1.02613	0.981428	1.06842	1.03442	1.11262	1.04351	1.05123	1.13449	0.0842805
PML_HUMAN	0.950555	0.971847	0.967149	0.880139	0.940033	0.968754	0.923962	0.998415	0.884313	0.74897	0.88229	0.652887	0.996944	0.948209	1.02543	1.02135	0.982038	0.978889	1.25337	1.30418	1.35087	1.33648	0.238632
PMVK_HUMAN	0.939615	0.937002	1.26241	0.913674	1.12996	1.16974	0.955081	0.976251	1.0277	1.02552	1.21069	1.13632	0.774616	0.657631	0.862493	0.948747	0.713461	1.05697	0.656299	0.846102	0.805718	0.847574	-0.100483
PNCB_HUMAN	0.914048	0.791052	0.90817	0.916591	0.89873	0.862288	0.968473	0.892687	0.821676	0.953694	1.09368	1.00088	0.701378	0.486398	0.94716	0.980171	0.896622	1.03187	0.722565	0.741121	0.926726	0.812862	0.220678
PNKP_HUMAN	0.97675	0.541645	0.845117	0.985378	1.00316	0.91171	1.05623	0.821616	0.804257	1.17054	1.37643	0.932901	1.10555	1.14044	0.981239	0.905772	1.13502	0.924903	1.00142	1.16475	0.866242	0.880512	-0.461968
PNPH_HUMAN	0.92223	0.862853	0.955707	0.898417	1.00249	0.865544	1.01948	0.924122	0.93901	0.988825	0.904418	0.867611	0.718546	0.412454	0.909652	1.00819	0.882605	1.0356	0.746587	0.73771	0.877215	0.859594	0.555083
PNPO_HUMAN	0.960776	0.953357	1.03004	1.06247	0.961065	0.881064	1.05776	1.02256	1.00624	0.89591	0.851004	0.709771	0.684539	0.765567	1.0471	1.0415	0.817173	1.02335	0.660356	0.701437	0.897896	0.885726	0.649975
PNPT1_HUMAN	1.23276	1.37057	1.13839	1.17449	1.07717	1.24107	1.0626	1.12444	1.50541	1.35415	1.26207	1.43685	1.44453	2.25263	1.01439	0.946155	1.17651	1.02804	1.13855	1.45095	1.11658	1.08165	-0.619798
PO210_HUMAN	1.39351	1.40972	1.07741	1.14201	1.15148	1.31228	1.2119	1.2454	1.36396	1.13869	1.23715	1.21836	1.21449	1.25734	1.05246	0.996576	1.05953	0.83994	1.02191	0.6249	0.871624	1.01504	-0.0945934
POP1_HUMAN	0.872769	0.898805	0.734146	0.81811	0.919386	0.906181	0.948033	1.0332	0.857065	0.534451	0.713491	0.463132	0.867122	0.779357	1.08298	1.08209	0.954972	0.885174	0.443153	0.186026	1.08547	1.10832	0.649819
PP1A_HUMAN	1.02623	1.03043	0.965884	1.02408	0.988785	1.01047	0.998422	0.997724	0.9874	1.01694	1.00407	0.976229	0.972229	0.712709	1.01721	0.996444	1.02197	0.991212	1.00603	0.907663	1.00482	1.06942	0.504448
PP1B_HUMAN	0.902801	0.932821	1.2007	0.965809	0.983687	0.921549	1.01575	0.958258	1.05671	0.967289	0.925187	0.840088	0.894645	0.79085	0.993003	1.01625	1.0501	1.10453	0.968605	0.80193	1.01382	1.06333	0.617709
PP1R7_HUMAN	0.887666	0.837851	0.952178	0.889769	0.914949	0.855564	0.822621	0.787297	0.921821	0.789915	1.02256	0.792679	0.738521	0.603688	1.04188	0.991812	0.839433	0.965239	0.667913	0.734071	0.928474	0.819105	0.469754
PP1R8_HUMAN	0.722769	1.01338	0.822323	1.03402	0.946044	1.012	1.0968	1.04722	0.86581	1.04184	1.24303	1.12988	0.778222	0.746682	0.925718	0.953112	0.953592	1.03959	1.07677	1.14768	0.96135	0.92188	-0.321246
PP2AB_HUMAN	0.908139	0.921816	0.862433	0.914844	0.939932	0.937855	0.954439	0.908888	0.977218	0.936766	0.889688	0.952471	0.848111	0.846759	0.940027	1.01524	0.861006	0.965669	0.846982	1.02372	0.950631	0.963406	0.249171
PP2BA_HUMAN	0.944228	0.881169	1.01243	0.849754	1.05148	0.953923	0.970239	0.934382	0.862696	0.784363	0.879181	0.826445	0.872716	0.797806	0.890569	0.938714	0.837296	0.868778	0.74944	0.869633	0.9108	0.939892	0.447708
PP4C_HUMAN	0.839916	0.856237	0.703485	0.70018	0.907406	0.902199	0.888122	0.893574	0.936335	0.999083	1.01236	1.02521	0.784238	0.770217	0.885248	0.933704	0.836703	1.03671	0.864255	0.81903	0.862708	0.955897	-0.103697
PP6R1_HUMAN	0.881166	0.927583	0.987247	0.956357	0.921547	0.929212	1.00322	0.894788	0.990784	0.969797	1.04155	0.810941	0.789003	0.786426	0.982403	0.976658	0.979982	1.21325	0.789877	0.860833	1.10419	0.7084	0.387686
PPAP_HUMAN	1.16946	1.04349	0.970267	1.03237	0.867666	0.827368	0.833577	1.04234	0.899987	0.886128	1.00473	1.18854	1.65734	2.05724	1.03717	0.943752	1.19411	1.05376	1.15734	1.31721	0.88526	1.02673	-0.42599
PPCE_HUMAN	0.942122	0.884156	0.876618	0.906944	0.88895	0.824651	0.945049	0.878473	0.914525	0.912893	0.933342	1.05915	0.729321	0.589794	0.89577	1.03869	0.862794	1.05722	0.748159	0.812403	0.840769	0.853067	0.279935
PPCS_HUMAN	0.908019	0.823108	0.951462	0.886306	0.942881	0.8344	0.914687	0.894817	0.819419	0.853985	0.900303	0.758871	0.605021	0.352662	0.906028	0.999983	0.814942	0.940649	0.70192	0.667537	0.870073	0.852854	0.576457
PPGB_HUMAN	1.01517	1.06864	0.968716	1.04578	1.00568	0.986039	0.937602	0.97741	0.808609	0.924155	0.7674	0.865699	1.06364	1.21492	0.967259	0.908393	1.05936	1.08717	1.25904	1.33068	1.09671	1.05579	-0.0349852
PPIA_HUMAN	0.861851	0.88651	0.861827	0.858559	0.983251	0.935853	0.97658	0.932705	1.01565	0.896728	0.916403	0.937547	0.737564	0.532772	0.878514	0.961999	0.797725	0.984521	0.741164	0.900268	0.894126	0.888024	0.374811
PPIB_HUMAN	1.01095	1.03983	0.993145	1.02589	1.08263	1.13112	1.02113	1.11769	0.934079	0.84189	0.902591	0.962201	1.30141	1.5774	1.04284	1.01064	1.08239	0.968231	1.21373	1.28312	1.18174	1.19054	-0.258087
PPIC_HUMAN	1.0073	1.09071	0.829927	0.961187	0.94608	0.927071	0.854549	0.953839	0.85443	0.86099	0.95975	1.08692	1.02925	1.27302	0.918751	0.981674	1.31242	1.20242	1.41729	1.11551	1.10767	1.08698	-0.214572
PPID_HUMAN	0.854416	0.852913	0.897856	0.851787	1.063	1.04681	1.03028	1.01659	1.20055	1.39035	1.12544	1.16664	0.804342	0.843156	1.03603	1.05965	0.83656	0.962538	0.858976	1.05435	0.959387	0.928884	-0.228851
PPIE_HUMAN	0.894273	0.900795	0.943183	1.00665	1.11417	1.08424	0.967536	1.066	1.0053	0.948948	0.853256	1.06547	0.895127	0.737105	0.986614	1.00099	0.977537	1.05619	0.957445	1.10481	1.13989	1.09012	0.255007
PPIF_HUMAN	1.11598	1.17632	1.05987	1.13075	1.14081	1.31762	1.09425	1.20923	1.26185	1.08429	1.10516	1.20773	1.58054	2.39725	0.962259	0.922408	1.02842	0.908457	1.22945	1.32228	1.01615	1.1478	-0.543278
PPIG_HUMAN	1.06591	1.0172	1.1114	1.05602	1.08092	1.00831	0.892405	1.04832	0.91721	0.706224	0.854071	0.697436	1.41044	1.29031	0.987283	0.912596	0.932854	0.968522	0.879719	0.801812	0.994661	0.921827	0.202841
PPIH_HUMAN	0.913664	0.895993	0.924643	0.940528	0.978968	0.99446	0.945021	0.998113	1.04919	1.05853	0.909318	0.934835	0.744748	0.63085	0.922581	0.946945	0.814828	0.952334	0.750348	0.965698	0.888895	0.889602	0.285821
PPIL1_HUMAN	0.927666	0.988414	1.03845	0.917379	1.02488	1.04922	0.931099	1.06028	1.02299	0.872832	0.80647	0.890928	0.8291	0.701786	0.960675	0.967183	1.04721	1.09909	0.934857	1.01638	0.995977	0.860869	0.59435
PPIL4_HUMAN	0.791377	0.815256	0.574903	1.11832	0.947958	1.13586	0.94728	1.10538	0.985268	1.04942	1.25576	1.09103	1.01386	0.808072	1.09537	0.999245	1.14942	1.00824	1.29554	1.41638	1.29211	1.0819	-0.237961
PPM1G_HUMAN	0.946385	0.883949	0.966676	0.905545	0.972898	0.980681	0.972343	0.982511	1.0165	0.961077	1.04546	0.810812	0.811536	0.701335	0.938751	0.958305	0.919468	0.895483	0.783115	0.926369	0.944254	0.779094	0.362574
PPME1_HUMAN	0.952486	0.938363	0.996351	0.798162	0.912405	0.93958	1.00299	0.859771	1.10513	1.54125	1.00699	1.31074	0.55022	0.457931	1.33542	1.12695	0.738541	0.900236	0.75111	0.788361	1.02598	1.23809	0.0835444
PPP5_HUMAN	1.05748	0.978405	0.983988	1.05481	0.891004	0.953733	0.885894	0.928856	0.904074	0.910331	1.12409	1.20764	0.708298	0.812737	0.809376	1.0689	0.79081	0.965659	0.780229	0.747165	1.00764	0.809297	-0.194951
PPP6_HUMAN	0.867078	0.823173	0.688139	0.610985	0.890739	0.844416	0.816774	0.670745	0.81875	0.926616	0.778844	0.940569	0.941667	1.14823	1.12177	1.06431	0.97112	0.965913	0.853757	0.96731	1.24219	0.899475	0.0145833
PPR18_HUMAN	0.75297	0.930466	0.925442	0.702204	1.07869	1.10109	1.06247	1.01458	0.99713	0.947192	1.07492	1.13004	0.834857	0.890481	0.993096	0.954824	1.00173	0.965693	1.1554	0.897912	0.849908	0.919164	-0.254421
PPT1_HUMAN	1.0098	1.00032	1.03144	1.09575	0.990851	1.00411	0.941165	0.987895	0.907149	0.888302	0.953011	0.994211	0.899261	0.82314	1.04703	1.02002	1.04348	0.979897	1.17321	1.38181	1.12204	1.1101	0.0579942
PR38A_HUMAN	1.07975	1.02098	1.00216	0.839347	0.977424	1.08295	0.797969	1.01885	0.930918	0.838164	0.91624	1.0256	1.0402	0.932847	1.06437	1.03871	1.04696	0.974689	1.25921	0.932523	0.914822	1.21176	0.0803313
PR38B_HUMAN	1.07637	1.09543	0.953615	1.14461	1.02386	0.980609	0.895475	1.07114	1.15983	0.995843	0.868045	0.758151	1.12087	0.944596	1.07505	1.15365	0.930403	0.829118	1.18018	0.961198	1.12364	1.04847	0.487383
PR40A_HUMAN	1.01248	1.02186	0.954152	0.973989	0.964418	1.07564	0.911424	0.996341	1.02714	0.946876	0.920252	1.06693	1.28594	1.58398	1.14104	1.0185	1.189	1.05601	1.24324	1.46756	1.19095	1.16997	-0.332679
PRAF3_HUMAN	0.996539	1.09933	0.960048	0.986779	1.14251	1.37999	1.1605	1.21748	1.26298	1.06789	1.01748	1.08792	1.12873	1.03679	1.23462	1.07645	1.13884	0.862836	1.17397	0.851307	0.889798	0.920953	0.0809636
PRC2C_HUMAN	1.14651	1.00435	1.05252	1.17154	1.17771	1.14459	1.19431	1.21945	0.916589	0.817509	0.755373	0.901743	0.979951	0.574906	1.02626	1.16042	0.995499	0.984898	1.26498	0.701073	1.01011	1.13355	0.572793
PRDX1_HUMAN	0.873006	0.975146	0.903503	0.920075	1.02654	1.00864	1.00681	0.964251	1.03523	1.03854	0.953795	0.983547	0.881169	0.700016	0.98775	1.02066	0.918655	0.939676	0.937978	1.10419	1.02967	0.914501	0.241891
PRDX2_HUMAN	1.02844	0.978908	1.09238	1.0289	0.994204	0.939526	1.02924	0.947743	0.994232	1.01103	1.08941	0.98049	0.778192	0.515376	0.963298	1.01789	0.871407	0.998943	0.804712	0.879256	0.959054	0.902275	0.336676
PRDX3_HUMAN	1.18386	1.29631	1.16833	1.2005	1.14827	1.22718	1.18369	1.21886	1.28787	1.17958	1.1834	1.46139	1.72706	2.52222	1.14827	1.05046	1.15526	0.938502	1.10567	1.24131	1.08936	1.12494	-0.533917
PRDX4_HUMAN	1.08994	1.10191	1.03002	1.03541	0.971233	1.00493	0.909393	0.928537	0.834506	0.665478	0.858782	0.830092	1.57449	2.27627	1.12348	1.09331	1.10979	0.942525	1.10966	1.04304	1.07193	1.19572	-0.205776
PRDX5_HUMAN	1.05769	1.06788	1.00161	1.06628	1.05301	1.02249	1.1104	1.04756	1.25236	1.17339	1.42822	1.5335	1.03744	1.11627	0.990814	0.964496	0.998392	1.01776	0.933078	1.04007	0.829399	0.861256	-0.640557
PRDX6_HUMAN	0.915151	0.866588	0.898124	0.911635	0.965867	0.878784	0.998489	0.904798	0.925035	0.907929	0.938684	0.915294	0.746901	0.49821	0.911798	1.01448	0.78878	0.998074	0.713188	0.760774	0.875318	0.862937	0.462074
PREP_HUMAN	1.30645	1.22194	1.08633	1.23883	1.12938	1.08285	1.18313	1.07495	1.33165	1.32168	1.28703	1.31238	1.47526	1.80889	1.04826	1.03529	1.15839	0.959017	1.0157	0.749768	0.967969	1.16569	-0.401274
PRKDC_HUMAN	1.07897	1.02184	1.04015	1.00363	0.965711	1.00309	0.919128	0.912629	0.933709	0.815038	0.865349	0.771627	0.85088	0.822094	0.976682	0.941123	0.976142	0.869323	0.722918	0.386348	0.797375	0.866172	0.497365
PRKRA_HUMAN	1.10703	1.17303	1.31767	1.07313	0.881834	0.883346	1.07719	0.989209	0.824917	1.12688	1.11474	1.07563	1.16879	1.22983	1.10941	1.06942	1.07378	1.07129	0.813836	0.737806	0.98936	1.00677	-0.0150389
PROSC_HUMAN	1.05158	0.899505	1.00048	1.06226	0.942979	0.919515	0.928452	0.878227	0.915058	0.853828	0.961245	0.830113	0.835166	0.770574	0.936035	1.00988	0.972643	1.06053	0.883815	0.993103	0.948625	0.865894	0.494553
PRP16_HUMAN	0.939219	0.973359	0.952448	0.937815	0.947519	0.791581	0.849522	0.891099	0.806176	0.954678	1.03715	0.942874	0.82005	0.523146	1.09976	0.985553	1.21006	1.14124	1.22098	0.811159	0.89971	0.934287	0.347383
PRP17_HUMAN	0.830564	0.881314	0.736325	0.702113	1.05282	1.05985	1.01085	0.89333	0.95423	0.918086	1.22403	1.25385	0.924222	1.26209	1.11786	1.13759	0.962645	0.87438	0.802215	0.882091	1.02239	1.12035	-0.440169
PRP19_HUMAN	0.993113	1.01448	0.931185	0.977709	1.02437	1.10091	0.95502	1.0394	1.03883	0.962986	1.03533	1.03695	1.28134	1.25328	1.04034	0.970362	1.00873	0.932551	1.172	1.17658	1.12378	1.17093	-0.394953
PRP31_HUMAN	1.09227	1.17509	1.03935	1.06792	1.02407	1.0337	0.969002	0.956742	1.04229	0.97426	0.958717	0.834486	1.20979	1.17639	1.08049	1.06033	1.0471	1.00715	1.06367	1.07029	1.04677	1.19803	0.272859
PRP4_HUMAN	0.981291	1.01408	0.976102	0.995375	1.02847	1.1442	0.993636	1.05834	1.03961	0.876541	1.02888	1.13133	1.05176	0.955763	1.10765	1.10515	0.991794	1.00709	1.14444	1.11609	1.03379	1.14707	-0.11205
PRP6_HUMAN	1.00113	0.916503	0.7434	0.995045	0.961314	0.977346	0.869426	1.00145	0.871879	0.608745	0.663205	0.633124	1.22538	0.943	1.13069	1.01887	1.06655	0.910874	0.816231	0.706959	1.19325	1.00437	0.604152
PRP8_HUMAN	1.06068	1.01444	1.07041	1.01436	0.973776	1.04715	0.957019	1.01276	1.06278	0.877966	0.880014	0.8881	0.863749	0.789748	1.02001	0.962596	1.0119	0.956289	0.989956	0.811913	0.920826	0.938798	0.629096
PRPF3_HUMAN	1.24543	1.27216	1.13073	1.1146	1.13367	1.1946	1.13517	1.13619	1.13548	0.650563	0.819792	0.876167	0.882496	0.864551	1.0001	1.05252	1.07656	0.914084	0.836882	0.486292	1.00164	1.00958	0.540017
PRPS2_HUMAN	1.02043	1.09073	0.982466	0.934993	0.941651	0.850168	1.03279	0.89638	0.951997	0.961113	1.0452	0.879713	0.866411	0.820682	1.00298	1.01442	1.04476	1.13026	0.947652	0.949712	0.992496	0.876601	0.49473
PRS10_HUMAN	0.980801	0.947215	1.01769	1.03586	1.00195	1.07188	0.986519	0.969339	1.14115	1.03446	1.04801	1.04889	0.983738	1.09959	0.963294	1.00932	0.912948	0.949638	0.942273	1.00929	1.04396	1.04886	-0.455258
PRS4_HUMAN	0.993525	1.06682	1.10445	1.05324	1.08196	1.16954	1.00266	1.12888	1.23765	1.06634	1.03817	1.09211	1.00698	1.01678	0.957358	0.993262	0.985052	1.01226	0.922346	0.858462	0.96623	1.03069	-0.0310034
PRS6A_HUMAN	1.00366	0.976381	1.01591	0.972386	1.08169	1.06564	0.99427	1.0228	1.22559	1.17051	1.04295	1.22963	1.02233	1.1778	0.973639	1.02853	0.932701	1.02362	0.941842	1.09131	0.946001	0.976905	-0.557383
PRS6B_HUMAN	0.930201	0.933689	1.01112	0.971166	1.08809	1.1499	1.04901	1.04935	1.10058	1.14332	1.21884	1.29057	1.09571	1.22966	0.973768	1.01158	0.951954	0.975907	1.02583	1.08165	1.01051	1.00305	-0.859775
PRS7_HUMAN	0.958527	0.967652	1.01873	1.00242	1.07695	1.15265	1.00903	1.0813	1.10273	1.06021	1.01188	1.08712	1.0322	1.21099	0.986152	1.01652	0.903747	0.96	0.933633	1.00605	0.982958	1.03523	-0.492721
PRS8_HUMAN	0.924144	0.966374	0.987558	1.00654	1.03355	1.10682	0.98987	1.01731	1.20597	1.12672	1.12059	1.2011	1.04009	1.33215	0.944741	0.971428	0.950205	0.988319	1.01347	1.09602	1.08242	1.15094	-0.732912
PSA_HUMAN	0.974993	0.906037	1.01288	0.907987	0.979284	0.924148	0.965578	0.894979	1.00208	0.91928	0.959383	0.944555	0.674969	0.432608	0.854752	0.920051	0.792383	0.950286	0.684642	0.533585	0.875922	0.888694	0.388236
PSA1_HUMAN	0.987568	0.94867	1.01035	0.993535	1.06067	1.02622	0.950721	1.03295	1.01779	0.942853	0.989995	0.909357	0.856849	0.688598	0.971583	1.00583	0.974632	1.00046	0.926577	1.00457	1.04691	1.02116	0.493742
PSA2_HUMAN	0.968566	1.05001	0.913344	0.967952	0.965503	0.98517	1.03272	0.991352	0.994562	1.14967	1.0597	1.06488	0.948174	0.664504	1.0254	1.06421	0.966399	0.975894	0.91606	1.05503	0.933651	0.97934	0.174991
PSA3_HUMAN	0.901645	0.904338	1.03643	1.00783	1.00384	1.04433	0.907207	0.950912	0.979445	1.00148	0.961631	0.900212	0.822664	0.624557	0.977154	1.02822	0.848065	0.930606	0.846026	0.858739	1.00163	1.05729	0.399587
PSA4_HUMAN	0.938963	1.01887	0.963564	0.94952	0.996933	1.05771	1.0093	0.993382	1.12748	1.06776	1.0491	0.991574	0.867023	0.617598	1.0069	0.98621	0.975461	0.998171	0.926695	0.941837	1.01121	0.935882	0.339292
PSA5_HUMAN	0.982223	0.987712	1.14155	1.04808	1.04716	1.04334	1.0171	1.01648	1.12803	1.08186	0.933922	0.933154	0.864538	0.681276	0.960398	0.988519	0.918085	0.978972	0.914135	1.05454	0.974643	0.974832	0.395908
PSA6_HUMAN	0.889759	0.857591	0.979902	0.945578	1.02879	1.06669	0.960888	1.02831	1.04768	0.977827	0.975567	0.926429	0.880125	0.615507	0.92003	0.959248	0.905931	0.897501	0.868768	0.951872	1.05175	1.04207	0.310972
PSA7_HUMAN	0.940082	0.974835	0.9836	0.982786	1.01319	1.04592	0.960599	1.0069	1.03422	0.991176	1.04054	0.909788	0.855712	0.672791	0.959964	0.98227	0.919794	1.0105	0.93175	0.979129	1.00973	1.00057	0.370215
PSB1_HUMAN	0.982996	0.940712	1.04994	0.993152	1.10371	1.06915	1.01963	0.974553	1.04146	0.962735	1.0113	0.888693	0.842284	0.599596	0.992788	0.979987	0.927192	0.962835	0.899682	0.843345	0.984358	0.998307	0.492244
PSB10_HUMAN	0.999129	0.9734	0.967435	1.00371	1.04016	1.03578	0.938075	0.981173	0.877094	1.03948	1.1099	0.951643	0.814703	0.55991	0.943816	0.918005	0.965695	0.986145	0.871728	1.00699	1.11253	1.00796	0.209432
PSB2_HUMAN	0.995395	0.971079	1.03691	1.02372	1.06035	1.11009	1.0358	1.03549	1.08027	1.06193	1.04566	0.991569	0.860031	0.623533	1.04664	1.05302	0.975101	1.00544	0.879182	0.763134	1.09641	1.02345	0.432825
PSB3_HUMAN	1.01339	1.00431	0.98717	1.01816	1.04166	1.10185	0.986564	1.04081	1.00671	1.05676	0.976055	1.0116	0.830325	0.580164	0.967176	0.947608	1.01065	1.03888	0.901307	0.987888	0.997666	1.0438	0.359623
PSB4_HUMAN	0.913611	0.890086	0.941536	0.897786	0.998865	1.06735	1.02946	0.999073	1.1575	0.934126	0.984575	0.84775	0.862484	0.637001	0.929988	0.916396	0.881074	0.948786	0.863105	0.948961	0.934967	0.976368	0.399192
PSB6_HUMAN	0.945248	0.985154	1.03885	1.03954	1.11762	1.15092	0.960032	1.11657	1.01686	0.960053	1.07529	0.935442	0.904982	0.621159	1.00113	1.04279	0.868877	0.914828	0.929323	0.958678	1.14915	1.01922	0.300136
PSB7_HUMAN	0.965702	0.88843	0.993009	1.07451	1.04093	1.15082	1.07161	1.03108	0.998395	0.94351	0.903936	0.958599	0.95886	0.731433	1.04018	1.0415	1.06915	1.06376	1.05398	1.06018	1.00085	1.035	0.463193
PSB8_HUMAN	0.966801	0.955666	0.95184	0.962373	1.03259	1.0265	1.05607	1.02816	1.02275	0.912106	1.07057	0.927841	0.903075	0.602977	0.987685	0.967275	0.942398	0.937627	0.918745	0.924906	1.04049	1.07172	0.404526
PSB9_HUMAN	0.853636	0.903923	0.894946	0.923628	1.02722	1.08939	0.990452	0.995862	1.04462	0.919015	1.03798	0.942458	0.771679	0.538097	0.958036	0.982991	0.923152	0.942073	0.771038	0.839455	1.00568	0.964131	0.344489
PSD11_HUMAN	0.959951	0.933889	1.00042	0.999773	1.00421	1.02809	0.921456	0.941938	1.08484	1.10699	1.13221	1.1036	1.00765	1.06613	0.989528	1.00335	0.950299	0.970176	0.896383	0.877223	1.05326	1.09156	-0.436238
PSD12_HUMAN	0.925874	0.874388	0.890771	0.853123	1.0758	1.11208	0.922062	0.94761	0.968903	0.98114	0.930384	0.905191	0.896586	0.995165	0.934838	0.969948	0.942215	0.964203	0.949876	0.86346	0.951319	1.00482	0.0242022
PSD13_HUMAN	0.962036	0.942488	0.96002	0.923966	0.971342	1.05213	0.926568	0.957756	1.05421	1.06416	1.09873	1.07685	1.04087	0.999758	1.03307	0.991713	0.922815	1.04765	0.851592	0.740374	1.12307	1.03827	-0.101245
PSDE_HUMAN	0.908498	0.94499	0.940664	0.984238	1.03285	1.13234	0.93891	0.946268	1.29403	1.23937	1.21423	1.19932	1.04765	1.55233	0.929025	0.937532	0.917933	0.97286	0.885387	0.898107	1.00738	0.988607	-0.628008
PSIP1_HUMAN	1.13881	1.42591	1.14989	1.23364	1.01693	1.1813	1.06879	1.15687	1.12428	0.865345	0.996462	1.15703	0.982251	1.29314	0.965793	0.99455	1.05445	0.91228	1.05481	0.938546	0.919602	0.98928	-0.146203
PSMD1_HUMAN	0.963942	0.9252	0.984513	0.995529	1.02939	1.02005	0.94728	0.970053	1.05502	1.1214	1.04709	1.10027	0.952319	1.33037	0.954025	0.990291	0.991337	0.998641	1.01651	1.01198	1.03709	1.00601	-0.681525
PSMD2_HUMAN	0.979235	0.966685	0.988142	1.01434	1.00617	1.07591	0.980565	1.01412	1.12746	1.14972	1.1194	1.16714	1.07066	1.07841	1.06402	1.05631	1.016	1.02113	1.04351	1.01929	1.06554	1.00473	-0.590189
PSMD3_HUMAN	0.970211	0.956524	0.956703	0.965	0.959227	1.00238	0.903803	0.904329	0.92643	0.948166	0.93059	0.960533	0.9262	1.03761	0.985565	1.01489	0.913203	0.977054	0.823912	0.738601	0.924817	0.90612	0.110185
PSMD4_HUMAN	0.853183	0.945878	0.960382	0.980611	0.988928	1.11315	0.946133	1.02805	1.18027	1.00467	1.06981	1.08514	0.984881	1.09771	0.978166	1.01547	0.920337	0.954967	0.965464	0.988528	1.05056	1.08674	-0.444884
PSMD5_HUMAN	1.05571	1.06813	1.16248	0.963976	0.883125	0.864905	0.993645	0.923562	0.923022	1.0953	1.01203	1.02597	0.703795	0.834832	0.829286	1.02459	0.839526	0.954589	0.743936	0.749988	0.910715	0.982749	0.0787246
PSMD6_HUMAN	1.04578	0.970382	0.992445	0.993261	0.982462	0.995581	0.908336	0.930388	1.0426	0.983399	0.975604	1.08846	0.957946	1.05618	0.96314	0.985838	0.999189	1.01278	0.992375	0.904641	1.15135	1.12001	-0.163286
PSMD7_HUMAN	0.9014	0.978868	0.928618	0.939386	1.07139	1.03854	1.02975	1.01892	0.954715	1.18918	1.14567	1.24611	1.02776	1.17213	0.992271	1.0288	1.02114	1.06472	1.11317	0.903977	1.02707	0.969465	-0.654551
PSMD8_HUMAN	0.951344	0.992081	0.98391	0.989446	0.961733	0.97883	0.94397	0.955421	1.11597	1.19421	1.23115	1.20986	1.27768	1.46306	1.10731	1.19524	1.1212	1.16157	1.16796	1.12868	0.99624	0.920893	-0.546544
PSME1_HUMAN	0.967355	0.865184	0.945426	0.904326	0.985617	0.915766	0.973594	0.90591	0.91421	0.810477	0.95911	0.779023	0.700313	0.364421	0.902271	0.992153	0.86561	0.980627	0.75819	0.566444	0.981627	0.888441	0.591254
PSME2_HUMAN	0.984226	0.880299	0.981275	0.893805	0.95494	0.891543	0.98758	0.950582	0.847282	0.823336	0.956113	0.732069	0.726259	0.356271	0.922922	0.915929	0.862292	0.961198	0.717243	0.597567	0.919045	0.812393	0.609583
PSME3_HUMAN	1.01139	0.864223	0.917733	0.879795	0.834655	0.867104	0.834343	0.824246	0.897809	0.969431	1.03335	1.01841	0.669241	0.538375	0.847308	0.793347	0.920794	0.862972	0.882105	1.0814	0.779287	0.813221	-0.0900923
PSME4_HUMAN	0.990553	0.890311	0.889334	0.917823	0.922065	1.01571	1.11222	0.913654	1.20679	1.32376	1.07762	1.03039	0.860844	1.04736	1.03487	1.16923	1.16162	1.09356	1.09411	0.67023	0.786966	0.819277	0.0135672
PSMG1_HUMAN	0.95082	0.895149	1.03179	0.894284	0.872623	0.842653	1.01894	0.891463	1.13907	1.26572	0.950193	1.0044	0.648451	0.502078	0.994947	0.979443	0.958702	0.939422	0.676919	0.690582	0.870568	0.792632	0.313496
PSPC1_HUMAN	0.842181	0.947117	0.878302	0.922456	0.96807	1.08033	0.93745	0.975073	1.16923	1.039	1.17056	1.14195	1.25724	1.0821	0.987126	1.00289	1.05009	0.970987	1.34364	1.54637	1.0182	1.13733	-0.463811
PTBP1_HUMAN	0.923075	0.946086	0.932124	0.965078	0.985912	0.992144	0.964069	1.00308	0.891504	0.890722	0.906777	0.944443	1.11794	0.812849	0.961065	0.957006	0.962963	0.950184	1.03186	1.01301	1.06889	1.06611	0.292739
PTBP3_HUMAN	0.989898	0.912317	0.901934	1.03253	0.83933	0.856774	0.816619	0.801143	0.87495	0.844812	0.891984	0.817049	1.21114	1.2622	0.975493	0.917762	0.953423	0.945528	0.937483	0.892954	1.29883	1.09639	-0.00660777
PTCD3_HUMAN	1.29609	1.22809	1.18116	1.18199	0.975173	1.06936	1.02396	0.996832	1.27517	1.42257	1.26048	1.29189	1.11931	1.15406	1.10629	1.00344	1.13393	0.985415	0.999807	0.914707	1.23562	1.1161	-0.269631
PTH2_HUMAN	1.2665	1.20323	1.20693	1.17443	0.955235	1.06186	0.977477	0.981153	1.21398	0.890498	0.80944	0.973094	1.06025	1.06752	0.975656	0.988166	1.12401	0.8032	1.07579	0.880912	0.849887	0.881261	0.239191
PTMA_HUMAN	1.05709	0.982796	1.07821	1.04733	1.23207	1.2354	1.10657	1.08485	0.897978	0.884998	0.851895	0.618253	0.910529	0.413751	1.24099	1.66363	0.969297	1.17707	1.14495	1.16486	0.897061	0.834689	0.614498
PTN1_HUMAN	1.01951	0.990042	0.937587	0.99413	1.03575	1.09301	1.04155	0.982905	1.02565	0.761405	0.697082	0.770836	0.959847	0.756378	0.984914	0.92356	1.09379	0.999581	1.04262	0.720169	0.974254	1.34744	0.623344
PTN11_HUMAN	0.949399	0.930486	0.788763	0.841793	0.880722	0.772889	0.900548	0.987121	0.94531	1.02216	1.0292	1.06768	0.7763	0.554662	0.787048	0.922789	0.799922	0.802396	0.751533	0.925156	1.0878	0.943673	0.0193801
PTN12_HUMAN	0.904436	0.89209	0.806892	0.71829	0.968176	0.948024	0.996898	0.967767	1.00271	0.999478	1.01775	0.725664	0.988419	0.919131	1.03398	1.13415	0.853503	0.899479	0.703373	0.685278	0.893856	0.936973	0.375088
PTN6_HUMAN	0.977041	0.918363	1.04096	0.985265	0.989161	0.950511	1.01084	0.977488	0.994362	0.944126	1.03754	1.07728	0.75066	0.858407	0.921073	1.02882	0.965706	1.08492	0.932771	1.02105	0.935695	0.914308	-0.0505426
PTPRC_HUMAN	0.974021	1.01331	0.935762	0.95748	1.02647	1.09579	1.02562	1.02055	0.947048	0.740563	0.860116	0.771381	1.0456	0.835887	1.00402	0.935688	1.00014	0.968243	0.95589	0.693244	1.00932	1.03088	0.63628
PTPRE_HUMAN	0.973254	0.945016	0.905885	0.92761	0.952197	1.06983	0.975811	0.848556	1.16293	1.19527	1.11168	1.41831	0.66322	0.719492	1.03341	1.12875	0.977688	1.03626	0.957354	0.949472	0.859642	0.811404	-0.217042
PTPRJ_HUMAN	1.07538	1.09966	0.782751	0.917728	0.967248	0.846431	0.905593	0.862023	0.720301	0.468532	0.719223	0.867934	0.73727	0.568467	1.00717	0.960855	1.05602	0.998933	0.973749	0.788021	0.951101	1.00298	0.574292
PTSS1_HUMAN	1.22295	1.16265	1.11983	0.961479	0.910316	1.00038	0.963717	0.975323	1.19924	0.855369	0.949555	1.09311	1.21358	1.28713	1.12358	1.00022	1.17417	0.875801	1.10419	0.588119	0.822982	1.10542	0.0476675
PUF60_HUMAN	1.01103	1.00155	1.02537	1.02264	0.988458	1.0797	0.965513	1.01777	1.01568	0.960772	1.05761	1.01043	1.00338	0.770069	0.987384	0.94936	0.984939	0.935127	1.08811	1.19631	1.07515	1.15009	0.00270503
PUM3_HUMAN	1.21058	1.17996	1.02793	1.15095	1.04355	1.12089	1.04057	1.09787	1.01088	0.669681	0.820312	0.518952	0.826754	0.753274	0.966756	0.992886	0.97732	0.965584	0.694855	0.189625	0.820226	1.0327	0.615351
PUR2_HUMAN	0.967913	0.915296	0.942962	0.931814	0.963064	0.868876	0.979147	0.948578	0.922398	1.02534	0.988481	1.0093	0.828495	0.75423	0.86727	1.00523	0.817808	0.934544	0.70179	0.702642	0.820414	0.876679	0.157638
PUR4_HUMAN	0.842688	1.23903	1.51253	0.957908	0.922256	1.02388	0.988648	0.968766	0.949877	1.02756	1.09348	1.14632	0.820376	0.680711	0.980135	1.05647	0.823781	0.825062	0.751458	0.696416	0.897297	0.928855	0.0640159
PUR6_HUMAN	0.95562	0.867757	0.905824	0.907377	0.977352	0.872223	0.947055	0.90851	0.858379	0.860072	0.873257	0.796526	0.854265	0.859075	0.929379	1.03398	0.859636	0.982377	0.694222	0.583692	0.92284	0.901096	0.540434
PUR8_HUMAN	0.996515	0.908197	0.887166	0.937156	0.893538	0.814216	0.989748	0.945414	0.74713	0.981399	0.895164	0.935848	0.603158	0.434385	0.921832	0.969866	0.894726	1.05765	0.753503	0.880819	0.968538	0.833283	0.411997
PUR9_HUMAN	0.966177	0.906037	0.991395	0.930597	0.998183	0.921053	0.991077	0.955903	1.00001	0.891761	1.00818	1.01579	0.75803	0.653726	0.921582	0.993505	0.81277	0.972336	0.735831	0.719852	0.875229	0.862799	0.272453
PURA_HUMAN	0.868304	0.924664	0.940174	0.851359	1.12912	1.18161	0.984494	1.18527	0.844924	0.841632	1.08333	1.01295	0.941725	0.9461	0.908248	0.985257	0.924336	1.02114	0.899892	0.979162	0.798561	0.980245	-0.190065
PURA2_HUMAN	0.955125	0.942149	0.940506	0.926156	0.943663	0.854874	0.897816	0.801264	0.966063	0.858061	1.03877	1.07209	0.603267	0.292138	0.827851	0.964526	0.87237	0.975123	0.675695	0.535603	0.806589	0.812516	0.287507
PURB_HUMAN	0.888296	0.970589	0.942762	0.939325	0.682378	0.960258	0.929337	0.973743	0.928894	1.10253	1.09443	0.906083	0.998464	0.969084	1.01446	1.07606	0.887483	0.995982	1.04028	1.14636	0.888477	0.867965	-0.224683
PWP1_HUMAN	1.08605	1.22562	0.940231	1.09605	0.991433	0.798567	1.16393	0.916886	0.762305	0.986716	1.01773	0.880639	1.25049	1.22632	1.00253	0.904328	1.26785	1.16565	1.3258	1.41348	0.917922	1.10917	-0.0537684
PWP2_HUMAN	1.06564	1.06095	1.00668	1.08114	1.02028	0.969758	0.902492	0.93697	1.12655	0.954583	1.07538	0.974102	0.99895	0.8378	1.07188	1.05751	0.950742	0.941984	1.02554	0.770873	0.937627	1.03817	0.326367
PX11B_HUMAN	0.910935	0.903692	0.997271	0.928322	0.962006	0.887316	0.805836	0.866584	0.824273	0.757549	0.636553	0.542869	0.892397	0.581239	0.913878	0.947778	1.04602	1.08358	1.17092	0.60108	1.21186	1.00168	0.691705
PXMP2_HUMAN	1.08719	0.966684	1.2373	1.08459	1.33677	1.39183	1.50179	1.27934	0.692499	1.18133	1.09767	1.10187	1.2115	1.08627	1.24997	1.06403	1.07871	1.1113	1.05406	1.05204	1.54509	1.2033	0.0518649
PYGB_HUMAN	0.968115	0.881237	0.810476	0.864593	0.905988	0.837578	0.958152	0.8239	0.856796	0.636244	0.788331	0.685419	0.567369	0.439565	0.908208	1.01918	0.861766	0.968242	0.68938	0.576596	0.876104	0.874736	0.720538
PYGL_HUMAN	0.964608	0.927252	0.892116	0.854636	0.957144	0.863953	0.96747	0.859734	0.881209	0.915681	0.893129	0.836654	0.661558	0.32611	0.932478	0.998163	0.910363	1.01529	0.724786	0.662071	0.908752	0.938352	0.607629
PYR1_HUMAN	0.916031	0.816004	0.765653	0.794969	0.914881	0.821281	0.951095	0.890373	0.84614	0.706983	0.943951	1.05164	0.787523	0.902966	0.93575	1.05318	0.916211	1.0188	0.833556	0.824388	0.89465	0.870438	0.0268355
PYRG1_HUMAN	0.989593	0.916133	0.981731	0.963743	1.0148	0.929567	0.959	0.977622	0.974078	0.937171	0.953754	0.926017	0.896984	0.901696	0.915811	1.00652	0.884077	0.983802	0.802952	1.00109	0.962821	0.961384	0.28111
QCR1_HUMAN	1.14136	1.24687	1.10661	1.15848	1.0992	1.25258	1.24185	1.15945	1.52974	1.27348	1.21235	1.26972	1.63441	2.80913	1.11704	0.991391	1.19129	1.0085	1.13923	1.34426	1.10721	1.22831	-0.49545
QCR2_HUMAN	1.12404	1.17018	1.10633	1.17509	1.10751	1.19576	1.21638	1.14299	1.31945	1.36586	1.22502	1.38505	1.74338	2.67608	1.18783	1.02565	1.20377	0.990791	1.11369	1.35976	1.13137	1.21384	-0.544264
QCR6_HUMAN	1.06289	1.16757	1.09515	1.1214	1.00272	1.13943	1.0337	1.10047	0.977511	1.1268	1.21559	1.22366	1.53685	1.8499	0.999618	0.96269	0.959212	0.861345	1.10025	1.14751	1.08459	1.1548	-0.619761
QCR7_HUMAN	1.17708	1.27644	1.07671	1.01945	1.08076	0.990862	1.08798	1.10293	1.38844	1.08562	1.06691	1.12375	1.53482	2.4348	1.02241	0.986088	1.0364	0.989908	1.03058	1.26322	1.19579	1.26593	-0.395391
QCR8_HUMAN	1.1348	1.20221	1.21087	1.38245	1.15564	1.03963	1.32886	1.22492	1.10869	1.33993	0.864549	0.978716	1.25702	1.27521	1.02815	0.953765	1.19686	0.926265	0.955122	0.797962	0.984156	0.716169	0.148976
QCR9_HUMAN	0.693986	1.05589	1.03383	1.00918	0.846444	0.856417	0.890569	0.920401	0.929539	0.899264	0.957137	0.895634	1.17536	1.4916	1.08563	1.07135	1.13269	1.13381	1.07389	0.791222	1.13642	1.23217	-0.0598284
QKI_HUMAN	0.9013	0.96005	0.830462	0.8992	0.858876	0.876219	0.887514	0.911535	0.853379	0.999799	1.03854	1.15759	0.886721	1.06355	0.913162	0.872209	1.03619	0.873085	0.948469	1.31052	0.931438	0.902572	-0.607546
RAB10_HUMAN	1.09564	1.14643	1.13966	1.10532	1.10633	1.1446	1.07957	1.11005	1.20749	1.07464	1.0986	1.08513	1.06433	0.946869	1.02315	0.994272	0.944401	0.852424	0.992752	0.862918	0.990805	0.957818	0.0173634
RAB13_HUMAN	0.989664	0.964484	0.97619	0.895	0.905458	1.054	0.968342	0.936034	1.12976	0.853836	0.800709	0.884352	0.941637	0.916783	0.976324	0.981843	0.929951	0.926793	0.963971	0.774185	0.958421	1.06637	0.503277
RAB14_HUMAN	0.899141	0.927266	0.826741	0.880144	1.02515	0.983233	0.981559	0.970761	0.940283	0.867393	0.786639	0.78081	0.997807	0.967968	0.980699	0.965742	0.921387	0.926504	0.897212	0.799284	0.940127	1.02962	0.566819
RAB18_HUMAN	1.08292	1.04468	1.07756	1.06876	1.05238	1.13583	1.01696	0.96815	1.20683	0.88491	0.930774	0.981444	0.98996	1.04236	1.03252	0.982296	1.00008	0.948665	1.00943	0.824299	0.834294	0.989371	0.206514
RAB1A_HUMAN	1.06406	1.00087	1.01035	1.0022	1.01084	1.09091	0.998435	0.974196	1.096	0.992564	0.942838	0.93007	1.07309	1.0605	1.0119	0.98576	1.00296	0.949992	1.04409	0.917093	0.919421	1.03888	0.183994
RAB1B_HUMAN	1.07128	1.01461	0.984063	1.04694	0.968148	0.966336	0.949508	0.990705	1.00386	0.937046	0.656603	0.832877	0.892648	0.882526	0.892005	0.940352	0.866691	0.876168	0.915167	0.783393	0.913483	0.989083	0.585274
RAB21_HUMAN	1.08956	1.10838	1.02381	1.05984	1.03259	1.12052	1.08161	1.01342	1.1809	0.991895	1.02692	1.05562	1.13503	1.04252	1.0757	1.02597	1.06443	0.992135	1.04308	0.902537	0.991734	1.03891	0.186967
RAB2A_HUMAN	1.03903	1.01897	0.939389	0.943293	0.981646	1.0279	0.994882	0.959488	1.07815	1.01916	0.926771	0.98317	1.00918	0.900635	0.991816	0.958935	0.996466	0.939712	1.04665	0.843105	0.935329	1.0164	0.334833
RAB31_HUMAN	1.19837	1.17471	0.91718	1.08366	1.00036	1.10531	0.995346	0.972036	0.98259	0.87831	0.92817	0.930536	1.03145	0.973063	1.00199	1.062	1.08446	0.942981	0.902813	0.719198	0.929849	1.01902	0.437257
RAB32_HUMAN	1.17138	1.21599	1.0402	0.91208	1.02196	1.00305	0.960676	0.89439	1.05397	1.0661	1.22878	1.37589	1.20771	1.32418	1.19349	1.18236	1.17883	1.15423	1.21975	1.19163	0.786196	0.979113	-0.459855
RAB5C_HUMAN	1.05745	1.00487	1.00425	0.983297	0.955859	1.01698	0.982598	0.978069	0.97428	0.99047	0.865611	0.980409	0.999508	1.12391	1.04319	1.02366	0.960489	0.913642	0.939797	0.87749	0.923127	1.07401	0.107678
RAB6A_HUMAN	1.06262	1.04202	0.99316	1.04906	1.0612	1.11316	1.01889	1.00131	0.986303	0.844668	0.841425	1.02967	1.08234	1.35827	0.965515	0.92066	0.964836	0.941989	0.981508	0.928669	0.957884	0.965776	-0.215586
RAB7A_HUMAN	0.991316	1.03429	0.944605	0.938904	1.11825	1.19264	1.08048	1.0555	1.18291	1.06003	1.01635	1.07859	1.09615	1.00037	1.01014	0.977044	1.05697	0.920322	1.1063	1.05186	0.895186	0.975288	-0.166655
RAB7B_HUMAN	0.989586	1.01308	1.15774	1.01796	0.997987	1.0484	1.05422	1.03655	1.10448	0.780495	0.818912	0.807961	0.89711	1.04947	0.940571	0.893581	0.889365	0.799631	0.972882	0.656414	0.894049	1.09704	0.293794
RAB8A_HUMAN	1.01586	1.03981	1.19321	1.18742	0.934703	1.12078	0.940404	1.10035	0.939376	0.861139	0.82017	0.789243	1.10929	1.14528	1.07565	1.04249	1.06201	0.989877	1.0223	0.753416	1.03371	1.10983	0.387179
RAB8B_HUMAN	1.13889	1.20796	1.03617	1.21244	0.921169	1.06937	0.876631	0.940485	1.03887	0.955251	1.12381	1.18246	1.1033	0.939339	1.05844	0.973963	1.19724	1.10162	1.0307	0.975996	1.0579	1.18887	-0.0233201
RABL6_HUMAN	1.23669	1.37204	1.22606	1.19552	0.90803	0.73545	1.22668	0.920658	0.788365	1.27337	0.984078	1.2124	1.15455	1.15236	1.03787	1.0394	0.93021	1.09428	0.739786	0.945609	0.966012	1.06914	-0.00771911
RAC1_HUMAN	1.10999	1.06943	0.897725	1.27715	1.16553	1.26522	1.18961	1.17372	0.784292	1.08969	1.00124	0.945405	0.883048	0.473151	1.04393	1.03461	1.13864	0.965589	0.909131	0.720356	1.05712	0.958782	0.427841
RAC2_HUMAN	0.986761	0.988796	0.953426	0.948182	1.06406	1.12989	1.07189	1.07234	1.15109	0.998411	0.953457	0.92201	0.771173	0.756732	0.960351	0.965333	0.937274	0.900498	0.898199	0.770797	0.948113	0.92215	0.370794
RACK1_HUMAN	0.910179	0.919549	0.94622	0.907385	0.923364	0.874684	0.960174	0.949717	0.887656	0.780275	0.803177	0.854982	0.79466	0.599691	0.946543	0.983175	0.87493	0.983223	0.98115	1.07133	0.917796	0.921272	0.532124
RAD21_HUMAN	0.90886	0.939997	0.797713	0.877791	0.962935	0.915161	0.932126	0.948942	0.967216	0.933109	1.10156	1.04372	1.25376	1.2981	1.40153	1.16411	0.961089	0.973918	0.965956	1.00819	1.07006	1.15616	-0.128855
RAD50_HUMAN	0.910283	0.952825	0.970039	1.01251	0.967811	1.07808	0.865653	0.993751	0.941457	0.719569	0.915561	0.874136	1.08454	1.11157	1.01593	0.930901	1.03263	0.979172	1.07156	1.15849	0.975958	1.01645	-0.0447704
RADI_HUMAN	1.0179	0.94608	1.03623	0.999828	1.09673	1.07059	1.06564	1.03794	1.06389	0.976201	1.12788	0.929352	0.918947	0.549722	0.946579	0.979184	0.877316	0.916005	0.840188	0.876136	0.862948	0.949018	0.301108
RAE1L_HUMAN	0.843159	0.946629	0.794079	0.742231	1.01724	1.01664	1.04484	1.06199	1.07082	1.03947	1.02726	1.08954	1.16509	1.00555	1.01338	1.03617	1.00287	1.00341	1.13459	1.3931	1.12339	1.2443	-0.222911
RAGP1_HUMAN	1.00867	0.99827	0.959156	0.962534	0.981473	0.972641	0.978405	0.999258	0.921915	0.983957	1.06477	0.970822	1.08929	0.906151	0.989264	1.0269	0.999163	0.935378	1.09464	1.06324	0.942823	0.99601	-0.0683336
RALB_HUMAN	0.94876	0.937435	1.13926	0.9957	1.06832	1.08194	0.991573	1.05545	1.24247	1.06155	1.04006	1.02183	1.03021	0.909305	1.01931	0.941474	0.997113	0.994815	1.03991	0.8681	0.997565	1.07605	0.0972783
RALY_HUMAN	1.09321	1.09368	1.08792	1.0959	1.0404	1.16058	0.912373	1.03429	1.11173	0.958102	1.11411	1.0109	1.37754	1.60298	1.06221	0.990293	1.00767	0.935833	1.05238	1.04373	1.09829	1.13261	-0.391667
RAN_HUMAN	0.980504	0.913719	0.962154	0.92881	0.987187	0.945723	0.971259	0.978042	0.886695	0.840221	0.931421	0.772972	0.78521	0.475764	0.893389	0.992048	0.875451	0.940357	0.76049	0.743805	0.957012	0.888476	0.641467
RANG_HUMAN	0.927266	0.955006	0.90866	0.972092	1.04156	1.00763	1.04404	1.08948	0.847228	0.935417	0.821117	0.967923	0.777734	0.532414	0.852832	0.828954	0.91167	1.0106	0.783514	1.08337	0.799924	0.863417	0.28743
RAP1A_HUMAN	1.07468	1.10562	1.01239	1.22133	1.0926	1.19142	1.12703	1.04849	1.20611	0.864021	0.668092	0.771175	0.966567	0.8501	1.00679	0.923018	0.944153	0.918716	0.905644	0.764978	1.14306	1.18779	0.608448
RAP1B_HUMAN	1.07351	1.10114	1.14103	1.09076	1.14027	1.15121	1.11127	1.08872	1.10528	1.12078	1.03616	1.03011	0.997819	0.811652	1.02678	1.01688	1.08776	0.999373	1.07715	0.914201	1.12556	1.06942	0.390138
RAP2B_HUMAN	1.05591	1.16133	1.04041	1.07707	1.13586	1.2871	1.05712	1.0406	1.29778	0.763651	0.944519	0.922867	0.975731	0.908358	0.970698	0.93721	1.0495	1.00763	1.03352	0.789914	0.959578	1.00054	0.360836
RASA1_HUMAN	1.17151	0.814453	1.05659	0.920559	0.890387	0.857834	0.778994	0.808915	0.982826	1.04112	0.855008	1.06614	0.729895	0.693394	0.855046	0.963387	0.807647	0.94976	0.587476	0.633461	0.691598	0.6799	0.137559
RASN_HUMAN	1.15426	1.12447	1.06456	0.982858	1.03295	1.16421	1.05772	1.00704	1.02822	1.06722	1.01201	1.12871	1.0373	0.74472	0.95502	0.9897	1.09189	0.985958	1.01326	0.889802	1.01228	1.02703	0.224459
RAVR1_HUMAN	0.84699	0.906342	0.891023	0.851773	0.963452	0.88105	0.886198	1.01775	0.841439	0.850947	0.710055	0.861861	0.986676	1.24235	0.943719	0.910974	0.871641	0.908067	1.2451	1.24494	0.788621	0.87167	-0.203314
RB11B_HUMAN	0.997497	1.03713	1.05994	1.01407	1.07229	1.06803	0.992566	1.04846	0.984229	0.832887	0.890913	0.885904	0.854922	0.692396	0.914718	0.875935	0.981967	0.902331	0.952484	0.747931	1.05279	1.00931	0.512012
RB12B_HUMAN	1.29529	1.17704	1.28098	1.23369	1.17633	1.32872	0.898758	1.27371	1.12103	1.32799	1.30524	0.915786	1.66739	1.39195	1.1378	1.19334	1.11204	1.11374	1.4964	1.38601	1.29413	1.33968	-0.199474
RB3GP_HUMAN	0.969662	0.999238	0.974483	0.964647	0.907107	0.891817	1.00937	0.870616	0.698586	1.11243	0.918719	0.991735	0.982111	1.20517	1.02485	1.05325	1.26556	1.26826	0.993673	1.4977	0.879145	0.885728	-0.131978
RBBP4_HUMAN	0.99495	1.04717	0.959031	1.08845	0.964588	1.15426	1.15803	1.1752	0.866478	1.01766	1.00718	1.06041	1.27136	1.16787	1.03582	0.960075	1.06876	1.08391	1.23475	1.49986	1.08181	1.07279	-0.297516
RBBP5_HUMAN	1.05342	1.00939	0.989279	0.969118	0.989944	1.00036	0.882605	0.872014	0.92087	0.753175	0.914088	0.85252	0.93056	0.867222	0.995752	1.01997	1.33795	1.27088	1.00598	0.714995	1.14345	1.15598	0.507404
RBBP7_HUMAN	0.90196	0.917798	0.907339	0.95183	0.970679	1.01597	0.97583	1.00768	0.881473	0.857174	0.929392	1.04669	0.980972	0.990253	0.994315	0.931031	0.937161	0.957869	1.01654	1.11437	1.03216	1.08193	-0.279761
RBG1L_HUMAN	1.02058	0.964332	0.984577	0.822518	1.04648	1.14167	1.17996	0.975184	0.859703	0.866145	0.965107	1.135	0.757152	0.58534	0.916946	0.880601	0.697599	0.732889	0.624893	0.683759	0.897199	1.00005	0.083823
RBGPR_HUMAN	0.929894	0.824463	0.948755	0.961713	0.946861	0.817509	0.965661	0.903024	0.904126	0.768975	0.801238	0.859717	0.744121	0.974018	0.917672	1.07244	0.86003	0.978451	0.705653	0.742231	0.934891	0.835686	0.400025
RBM10_HUMAN	1.00509	0.984218	0.937819	0.938235	1.03172	1.04152	0.923047	1.09035	1.09997	1.00312	1.02527	0.827579	1.15977	1.01386	1.02217	0.991413	1.09486	0.981161	1.18158	1.20796	0.996583	1.05239	0.0925209
RBM12_HUMAN	0.829784	0.809084	0.834712	0.832899	1.04742	1.01033	0.944383	0.917553	1.15155	0.742694	1.12815	0.875793	0.726875	0.994996	0.941359	0.895154	0.995476	0.824572	0.950983	1.68555	0.737245	1.21798	-0.231771
RBM14_HUMAN	0.99214	0.993366	1.04102	1.01568	1.00794	1.08981	0.955101	1.0328	1.08628	0.915021	1.0373	0.844937	1.29831	1.45314	1.03303	0.989752	1.01736	0.959506	1.25082	1.28609	1.21917	1.20041	-0.251386
RBM15_HUMAN	1.00368	1.21099	0.988234	1.08443	0.947902	1.05253	0.871819	1.02104	0.998081	0.794652	1.12853	1.18505	1.26102	1.32653	1.05137	1.02738	1.09284	0.962041	1.19313	1.25361	1.09933	1.13793	-0.461294
RBM19_HUMAN	1.03929	1.13869	0.854526	1.02536	1.02696	1.16311	0.96182	1.07845	1.26417	1.34672	0.984773	0.953961	1.20278	0.990107	1.12941	0.946576	1.10523	0.938414	1.17767	0.950756	0.914673	1.29095	0.10023
RBM22_HUMAN	1.03813	1.15955	1.00625	0.960066	1.09141	1.13807	1.04906	1.06099	0.971791	0.980686	0.846598	0.949132	0.923701	0.85139	1.00577	0.973756	1.17079	1.03619	1.18669	1.31551	1.09783	1.20907	0.276651
RBM25_HUMAN	0.939499	0.930807	1.0275	1.00942	1.04335	1.18127	0.964037	1.09467	1.17172	1.11728	1.10798	1.10022	1.27483	1.37956	1.01177	0.94573	1.03917	1.03356	1.20494	1.35457	1.24137	1.19469	-0.554515
RBM27_HUMAN	1.12858	1.08116	1.10278	1.13593	0.966043	1.07229	1.01815	1.06604	0.908573	1.10772	1.22404	1.05967	0.966574	0.925289	0.897754	0.863426	1.18976	1.26912	1.39099	1.34499	1.19917	1.63581	-0.164543
RBM3_HUMAN	0.944345	1.06522	0.966979	1.08416	0.985155	0.937647	0.979368	1.05449	0.915282	1.17642	1.12015	1.04718	1.18138	0.607976	1.0375	0.990483	1.04472	1.00757	1.21737	1.54894	0.989594	1.07426	-0.0406373
RBM39_HUMAN	0.981505	1.03095	0.988302	1.02573	1.05719	1.06584	0.953085	1.06131	1.04004	0.961445	0.954875	0.968436	1.10381	1.02462	1.03491	0.962079	0.749815	0.570671	1.15547	1.14998	1.02397	1.20189	-0.197721
RBM4_HUMAN	0.957467	0.992508	1.08488	0.994977	0.989259	1.06723	0.938449	1.06305	1.01094	0.979702	1.03926	0.842817	1.13892	0.991577	1.01151	1.0004	0.969617	0.967643	1.21574	1.2445	1.07945	1.1745	-0.0171235
RBM47_HUMAN	0.945013	0.883314	0.811528	0.99662	0.893236	0.950891	0.92081	0.93072	0.92245	0.738179	0.76485	0.598052	1.40461	1.03395	1.09017	1.05631	1.00598	0.927781	1.11575	0.960905	1.00062	1.13531	0.396823
RBM8A_HUMAN	1.0806	1.1344	1.11973	1.16881	1.13503	1.29684	1.00386	1.2783	0.941396	0.816998	0.74204	0.859486	0.912089	0.904291	0.964775	0.954004	0.833991	1.00161	1.09283	1.32247	1.17996	1.19188	0.226573
RBMX_HUMAN	1.10917	1.11132	1.22886	1.13207	1.01714	1.15628	1.05261	1.19784	1.05295	0.998466	1.01165	1.09508	1.06686	0.778026	1.08986	1.05182	1.03931	0.974594	1.13191	1.11624	1.09773	1.13321	0.254909
RBP2_HUMAN	0.999326	1.06953	1.03948	1.06847	0.988561	1.06918	0.95922	0.996044	0.89823	0.779589	0.760449	0.748929	1.04352	0.964235	1.02852	1.01068	0.988122	0.991024	1.12495	0.844131	1.05085	1.08255	0.577175
RBP56_HUMAN	1.02139	1.00998	1.0118	1.18302	0.978779	0.955891	1.01867	1.01866	0.853042	0.919733	0.744305	0.907089	1.06534	0.676271	0.939812	0.88724	0.883237	0.977808	1.30974	1.55485	1.03331	1.02523	0.11905
RCC1_HUMAN	0.948501	1.05555	0.917096	0.958013	1.10485	1.09171	0.972666	1.06697	1.01676	0.873618	0.826269	0.818889	1.06136	0.861786	0.961524	0.978182	0.919342	0.968158	1.00742	0.735914	0.997512	1.03363	0.585826
RCC2_HUMAN	0.912932	0.896611	0.998395	0.959415	0.972319	0.91628	0.982586	0.974855	0.979402	0.948477	0.951107	1.01783	0.946633	0.798742	0.961768	1.04948	0.883393	0.968883	1.02187	1.5231	0.987238	0.980817	-0.0865537
RCN1_HUMAN	0.97547	0.990163	1.06882	1.07777	1.09429	1.14405	1.02501	1.14558	0.976327	0.939162	1.14556	1.22787	1.48585	1.72558	1.05154	1.00241	1.00871	0.90394	1.28489	1.40197	1.01768	1.08614	-0.627091
RCOR1_HUMAN	0.960033	0.987299	0.61348	0.977147	0.982135	0.972535	0.99866	1.01798	0.955133	1.06112	1.12045	1.21123	1.27019	1.41616	1.17995	1.33061	1.12222	1.00438	1.13261	1.14584	1.04464	1.24841	-0.330146
RD23B_HUMAN	0.897332	0.950438	1.08786	0.98627	0.982274	0.997278	0.98388	0.93925	0.928461	0.853796	0.988203	0.917619	0.784586	0.542362	0.941115	1.01118	0.927179	0.940452	0.875938	1.01551	0.996382	0.936054	0.389461
RDH13_HUMAN	1.33946	1.36036	1.338	1.15204	1.07803	0.995875	1.26305	0.935834	1.34338	1.21371	1.23156	1.60209	1.2175	0.933666	1.23186	1.0892	1.1831	1.14162	1.27766	1.16356	1.27332	1.19231	-0.141043
RECQ1_HUMAN	0.752703	0.839913	0.668649	0.737455	1.05229	0.865513	0.999145	0.916779	0.902311	0.87078	0.752717	0.588085	0.806888	0.791413	0.970466	0.906174	0.796819	0.988089	0.901099	1.34476	0.951003	0.911258	0.298152
RED_HUMAN	1.12972	1.19782	0.919465	1.09787	1.05575	1.09891	0.983262	0.967127	1.26848	1.25794	1.23493	1.31601	0.876457	0.940311	0.984742	0.972144	0.876085	0.953051	1.11891	1.02372	1.1257	1.2181	-0.389741
REEP5_HUMAN	0.906078	0.738994	1.00009	1.02651	1.00335	0.993029	0.918866	1.19447	1.24025	0.93154	0.755233	0.93305	0.90394	1.03006	0.884895	1.01266	0.989208	0.826881	0.970472	0.932916	0.76498	0.880826	0.0855421
RENR_HUMAN	1.17637	1.16228	1.19114	1.27429	0.907189	1.04678	0.962072	0.917901	1.38551	1.04756	1.42676	1.9648	0.938659	0.999372	1.12762	1.04078	1.01434	0.896415	1.28148	1.56878	0.943218	1.16316	-0.602354
RENT1_HUMAN	0.897352	0.902782	0.929042	0.966417	0.946947	0.942027	0.961323	0.958257	1.00708	0.903306	1.01505	0.916331	0.852213	0.718248	1.02834	1.04641	0.927197	0.966377	0.967253	0.973078	1.03159	1.08242	0.389381
REPS1_HUMAN	1.0731	0.924511	1.16968	1.053	1.00143	1.04542	1.01174	1.04927	1.23907	1.04053	1.22255	1.31161	1.11236	1.0545	0.952172	0.992665	0.973106	0.959172	1.01861	0.877559	0.95465	1.04032	-0.507145
RFA1_HUMAN	0.895546	0.838828	0.821045	0.809055	0.982264	1.06738	0.914859	0.943117	0.985904	0.743973	0.751758	0.628589	0.866204	0.975948	0.957302	0.981436	0.890253	0.957785	0.851013	1.01197	0.956464	0.946773	0.464269
RFA3_HUMAN	1.15428	1.03856	1.17779	1.05691	1.01486	0.890854	1.14668	1.11138	1.0017	1.07755	0.89062	1.07812	0.792798	0.718669	0.946631	0.986352	1.02921	0.990001	0.985583	1.27685	0.87284	0.926071	0.186881
RFC2_HUMAN	0.819331	0.868809	0.717643	0.771233	0.93649	0.90623	1.01902	0.884206	0.922793	0.700793	0.906997	0.577472	0.795599	0.772467	0.795675	0.940761	1.11143	1.23158	1.25046	0.858383	1.27973	1.10747	0.38221
RGS10_HUMAN	0.960712	0.879957	0.902464	0.918561	0.961321	0.925434	0.998092	0.883536	0.810158	0.768685	0.756087	0.798943	0.595118	0.29959	0.853338	0.935802	0.81936	1.00708	0.787023	0.816884	0.867492	0.849259	0.593079
RHG01_HUMAN	0.903344	0.860537	0.936405	0.882611	0.887828	0.831172	0.924422	0.930388	0.965093	0.919432	0.970833	0.840845	0.6657	0.233133	0.900208	1.0104	0.962451	1.09478	0.840808	0.720619	0.8387	0.754329	0.518257
RHG04_HUMAN	0.965739	0.84594	0.586894	0.801538	1.06878	0.955469	1.02461	0.958183	0.902048	0.887652	1.00044	0.989886	0.935781	0.840628	0.928609	1.01224	0.836489	0.949115	0.762161	0.738918	0.864225	0.982814	0.0890956
RHG09_HUMAN	1.12393	0.931726	1.0949	1.10921	0.99044	0.807331	1.04212	0.953335	0.828163	0.989026	1.22285	0.845931	0.963584	0.976966	1.05243	1.04255	1.13633	0.801661	0.831143	0.811343	0.724986	0.775661	0.0787221
RHG17_HUMAN	1.00526	1.00465	1.00187	1.10482	1.28741	1.01288	1.06252	1.03576	0.962892	0.951248	1.07913	0.904842	0.902701	0.692509	1.0757	1.09801	0.941118	1.06233	0.981646	1.25427	0.939961	0.927502	0.304442
RHG18_HUMAN	1.02743	0.867419	0.97956	0.84046	0.936563	0.832653	0.899963	0.858005	0.818147	0.595634	0.851148	0.663541	0.493242	0.2328	0.880684	0.993809	0.78463	0.938717	0.554689	0.615304	0.735014	0.828703	0.621496
RHOA_HUMAN	1.01763	1.02947	1.09112	1.02254	1.03766	1.15042	1.17932	1.03743	1.17673	1.117	0.924138	0.955194	0.870629	0.651391	0.939671	0.980839	0.90644	0.944138	0.878976	0.737386	0.976335	0.987966	0.422239
RHOC_HUMAN	0.996513	0.971439	1.03425	0.967579	0.958893	1.04976	1.24796	0.917198	1.56623	1.05267	1.27036	1.26855	0.736081	0.675834	0.868163	0.937243	0.859244	1.00504	0.756254	0.614103	0.833254	0.773232	-0.0307711
RHOG_HUMAN	0.967977	1.10773	0.97191	1.03026	1.06089	1.05133	1.0378	1.00953	1.02016	0.918951	0.896855	0.883914	0.888018	0.760982	0.955186	0.950021	1.00224	0.965246	0.97856	0.720349	1.00006	1.00398	0.611966
RIC8A_HUMAN	1.00065	0.985206	1.06078	0.966605	0.939479	0.822567	0.928804	0.872185	0.890115	1.16289	1.27017	1.05389	0.704393	0.84858	1.08255	1.04038	0.938474	1.09666	0.758197	0.759404	0.877024	0.870018	-0.047645
RINI_HUMAN	0.924478	0.911618	0.940264	0.957977	0.990503	0.961852	1.01683	0.937612	1.04406	0.900951	0.99604	0.979252	0.759067	0.665456	0.894782	0.980305	0.810328	0.99144	0.714285	0.708335	0.883881	0.87221	0.2987
RISC_HUMAN	0.986793	1.0681	1.06116	1.12792	1.09101	0.931521	1.05742	0.902491	0.775209	0.961462	0.866756	1.20413	1.13845	1.10649	0.964486	1.0763	1.15776	0.92402	1.24962	1.30472	1.08737	0.955569	-0.236301
RL10_HUMAN	0.910583	0.933636	0.87451	0.93584	0.957387	0.98376	0.970064	1.0481	1.00606	0.857371	0.798066	0.835621	1.01151	0.889514	0.92215	0.958827	0.813737	0.856229	0.998736	0.995465	0.926206	0.945171	0.344769
RL10A_HUMAN	0.90217	0.825565	0.944165	0.822488	0.946805	0.934115	1.05004	0.951474	0.967938	0.775785	0.77176	0.755464	0.805717	0.657914	0.900139	0.959604	0.85525	0.915607	0.795318	0.836913	0.914967	0.918163	0.726547
RL11_HUMAN	0.963205	0.967314	1.01443	0.958697	0.962131	0.979625	0.85921	0.87823	0.877993	0.79259	0.833544	0.779963	1.13733	1.17779	0.930925	0.978147	0.896384	0.930817	0.834875	0.865291	1.03348	0.979608	0.172303
RL12_HUMAN	0.924221	0.893435	0.879544	0.851236	1.01105	0.993858	0.927418	0.966785	0.942333	0.835648	0.943405	0.743906	1.0504	1.00644	0.975264	1.01157	0.942176	1.00797	0.971243	1.04806	1.01429	1.03848	0.298361
RL13_HUMAN	0.915283	0.898492	0.941097	0.91701	0.943835	0.936689	0.935463	0.940435	0.915873	0.741275	0.793715	0.786416	1.02062	0.699269	0.899648	0.929471	0.875355	0.88437	0.944089	0.893464	0.943584	0.955042	0.666748
RL13A_HUMAN	0.951797	0.89118	0.945171	0.962897	0.976599	0.992778	0.924302	0.976898	0.944056	0.836404	0.796406	0.700655	1.05227	0.924787	1.00187	1.0323	0.852062	0.896039	0.927905	0.977279	1.08327	1.04968	0.561099
RL14_HUMAN	0.76458	0.792428	0.791224	0.820001	0.822279	0.827684	0.919183	0.737733	0.847674	0.671269	0.748535	0.872281	0.92904	1.50186	0.700447	0.779921	1.03323	0.892024	0.67208	0.58679	0.774116	0.781922	-0.200646
RL15_HUMAN	1.00135	0.953285	1.00418	1.00288	0.856477	0.878011	1.04527	0.997929	0.850166	0.993496	0.892317	0.79471	1.07406	0.940543	1.02654	1.00882	0.932354	0.928359	0.954494	0.892388	1.02705	1.00372	0.515862
RL17_HUMAN	0.924602	1.04625	0.957394	0.945186	1.04698	0.968682	1.00039	0.930647	0.895821	0.918359	0.902782	0.951259	1.06356	0.904216	0.935353	0.964738	0.950837	0.943637	1.03204	1.09168	0.853364	0.878123	0.0859559
RL18_HUMAN	0.901434	0.823004	0.922803	0.767306	0.949092	0.933201	0.973945	0.992317	0.975139	0.894799	0.897526	0.69653	1.01876	0.823165	0.910828	0.976726	0.874242	0.826793	0.96757	0.981186	1.03606	1.05095	0.406206
RL18A_HUMAN	0.908988	0.804021	0.850813	0.817203	0.957866	0.767198	0.952235	0.837925	0.792208	0.991833	0.899713	0.794029	0.846634	0.667023	0.852955	0.866826	0.889054	0.828866	0.972221	0.923591	0.957013	0.943222	0.284846
RL19_HUMAN	0.845628	0.82972	0.890704	0.994432	0.983574	0.96309	0.910548	0.974276	0.939304	0.743985	0.799606	0.887057	0.99671	0.754379	0.911412	0.928923	0.894406	0.979095	1.04539	1.14954	0.896529	1.05761	0.232071
RL1D1_HUMAN	1.07298	1.0194	1.05512	1.03354	1.03736	1.1262	0.93269	1.01156	1.0173	0.985756	0.966487	0.85093	1.02364	0.67972	0.98774	0.9351	0.994656	0.882553	1.03019	0.686136	0.952798	1.13248	0.464708
RL21_HUMAN	1.1027	1.09454	1.10366	1.06156	0.998636	0.911963	1.03088	1.03508	0.877324	0.776563	0.763068	0.815091	1.045	0.699394	0.964062	0.995003	0.955363	0.876966	0.967261	1.04612	1.02486	1.02224	0.647619
RL22_HUMAN	0.910263	0.992664	1.04285	0.947475	1.04765	0.95343	0.922081	0.97186	1.02471	0.733444	0.876181	0.794867	1.01887	1.0813	0.930082	0.971659	0.919915	0.921271	0.839192	0.763201	1.00335	0.968173	0.36488
RL23_HUMAN	0.892724	0.939151	0.860402	0.823365	1.01762	0.986071	1.00565	1.01698	1.11152	0.817574	0.943607	0.943196	0.800865	0.870225	0.883917	0.946091	0.882094	0.953569	0.789722	0.690752	0.912987	0.960144	0.260807
RL23A_HUMAN	0.984177	0.930029	1.04438	1.03485	0.967114	1.01122	1.0531	1.02649	0.923724	0.878939	0.832967	0.790372	1.13723	1.10204	0.970131	1.00798	0.93472	0.942017	1.02577	0.971171	0.995067	0.972288	0.30182
RL24_HUMAN	0.803969	0.787954	0.797657	0.798642	0.871338	0.839416	0.884102	0.816294	0.99909	0.940636	0.821911	0.862999	0.901224	0.89906	0.845806	0.94562	0.836768	0.82548	0.797654	0.747974	0.832448	0.870291	0.150203
RL26_HUMAN	0.892194	0.942134	1.04564	0.947198	0.94309	0.982286	0.941391	1.00474	0.810632	0.674752	0.619895	0.526959	0.945047	0.748983	0.92346	0.980962	0.835822	0.86783	0.788312	0.766275	0.879878	0.847945	0.765802
RL27_HUMAN	0.931638	0.927452	1.01232	0.963096	0.951478	0.923263	0.953737	0.904385	0.843374	0.675411	0.783906	0.575119	1.04195	0.738405	0.89535	0.958732	0.884751	0.864689	0.872557	0.704705	0.957953	0.942981	0.734067
RL27A_HUMAN	0.922732	0.868775	0.913871	0.892137	0.972361	0.949604	0.988874	0.94545	0.904754	0.935189	0.987366	0.811967	1.03431	0.836972	0.94811	0.932012	0.948636	0.907477	0.973018	0.821361	0.986093	0.997958	0.407476
RL28_HUMAN	0.975553	1.00021	1.13256	1.04427	0.969866	1.01243	0.983366	1.0214	0.869345	0.763072	0.802395	0.772633	0.987181	0.839623	0.857152	0.96846	0.880512	0.863	0.899496	0.825299	0.986597	0.982782	0.524589
RL29_HUMAN	0.896876	0.775616	0.96021	0.925173	0.960144	0.956158	1.00876	0.998547	0.874914	0.79238	0.740431	0.729764	1.08562	0.773865	0.933734	0.952467	0.856621	0.960166	0.992396	0.951379	1.02342	0.899056	0.560307
RL3_HUMAN	0.947282	0.916693	0.959818	0.933891	0.940142	0.975326	1.00256	1.01501	1.02241	1.06184	0.988214	0.915686	1.20142	1.03633	0.985554	1.01067	0.930908	0.933929	1.06789	1.03081	1.04659	1.00984	-0.0753777
RL30_HUMAN	1.00307	0.95472	0.905465	0.955996	0.96291	0.933802	0.898741	0.854973	0.800992	0.662023	0.609667	0.530387	1.12933	1.33084	0.933597	0.975926	0.869442	0.899471	0.859588	0.818541	1.07131	1.09583	0.313579
RL31_HUMAN	0.929253	0.998178	1.14395	1.09359	1.03525	1.06118	0.927187	1.06327	0.865389	0.710465	0.76191	0.6346	0.928417	0.857487	0.857832	0.862716	0.908704	0.915875	0.948321	0.835037	1.01049	0.930891	0.510992
RL32_HUMAN	0.923575	0.939254	0.959717	0.989614	0.952023	0.968538	0.964331	0.955637	0.923567	0.888663	0.742384	0.767731	1.17143	1.27753	0.949006	0.975561	0.870715	0.976443	0.924058	0.980965	1.07538	1.0529	0.124181
RL34_HUMAN	0.893737	0.845579	1.04922	0.909493	0.968452	1.02859	0.990912	1.1476	1.03743	0.883591	0.953258	0.776355	0.957438	0.683644	0.833332	0.94102	0.929092	0.860688	0.85346	0.761516	0.969957	0.916765	0.452275
RL35_HUMAN	0.831409	0.911722	0.886727	0.835437	0.916296	0.91625	0.935256	0.891291	0.748705	0.623288	0.806333	0.56891	0.985982	0.549271	0.901926	0.843249	0.917241	0.864406	0.842522	0.635908	0.889359	0.869102	0.72341
RL35A_HUMAN	0.963618	0.935328	1.09081	1.01087	0.903531	0.919643	0.99853	0.86268	0.942527	0.784093	0.783592	0.701899	0.877959	0.735632	0.849451	0.880259	0.935509	0.955559	0.940507	0.871273	0.939422	0.918341	0.685226
RL36_HUMAN	0.935564	0.896917	0.968373	0.923748	0.919154	0.860853	0.895057	0.91986	0.975341	0.823778	0.720319	0.60492	1.0473	0.934962	0.95224	0.980059	0.765736	0.894395	0.890951	0.797314	1.05201	1.0286	0.618374
RL36L_HUMAN	0.857092	0.86945	0.940291	0.84164	0.912737	0.954555	0.924435	0.979547	0.960325	0.759257	0.871612	0.717516	0.970117	0.840295	0.888436	0.964146	0.706347	0.689114	0.948958	0.827896	0.991596	0.938293	0.284976
RL37A_HUMAN	0.882591	0.889896	0.989247	0.945488	0.989083	0.969291	1.06193	1.03532	1.02021	0.912473	0.711014	0.701428	1.01908	1.02763	0.87529	1.01965	0.842118	0.877758	0.914922	0.780661	1.05511	0.991982	0.489232
RL38_HUMAN	1.03736	1.07288	0.94902	0.96824	0.99677	1.02754	0.972086	0.857199	0.989328	0.89124	0.855973	0.911776	1.03998	1.03349	0.944955	1.01169	0.936228	0.940199	1.09443	1.16889	0.958592	1.04075	0.0708473
RL4_HUMAN	0.975965	0.999081	1.00714	0.99854	0.998861	1.00302	1.00539	0.99507	0.950362	0.882109	0.882793	0.769098	1.06003	0.788234	0.956085	0.975202	0.923548	0.957342	0.95586	0.913562	1.01305	1.02996	0.749268
RL5_HUMAN	0.94262	0.9126	0.930458	0.973028	0.965118	0.962577	0.956158	0.943094	0.865171	0.78584	0.749907	0.643605	0.913992	0.624007	0.9314	0.968426	0.883649	0.916181	0.896308	0.83737	0.961753	0.956333	0.84265
RL6_HUMAN	0.931815	0.947396	0.974137	0.987667	0.93809	0.97033	0.969589	0.973209	0.868954	0.807066	0.84112	0.757279	1.19263	0.937069	1.00302	1.00701	0.96936	0.943435	0.984997	0.960982	1.01251	0.999864	0.513158
RL7_HUMAN	0.919456	0.842602	0.892107	0.887923	0.9239	0.867856	0.913537	0.881781	0.785084	0.834003	0.802649	0.782888	0.97565	0.760396	0.939781	1.00613	0.943799	0.863308	1.04794	1.10626	1.04897	1.00636	0.380454
RL7A_HUMAN	0.764078	0.714866	0.848201	0.812281	0.823474	0.78387	0.910914	0.803977	0.965447	0.801678	0.796524	0.647106	0.853525	0.870593	0.803565	0.934128	0.874538	0.893374	0.762285	0.733873	0.937881	0.824502	0.507568
RL7L_HUMAN	1.06455	0.98898	0.939772	1.08483	0.94881	1.03445	0.919856	1.05411	1.02964	0.973877	0.857248	1.03101	1.0464	1.84185	1.08035	1.0644	0.989677	0.829105	0.932511	0.605171	0.86557	0.931911	-0.248141
RL8_HUMAN	0.868876	0.852155	0.9394	0.898536	0.957198	0.920167	0.999836	1.05095	1.06596	0.989244	0.931111	0.911383	0.899465	0.725283	0.848807	0.909698	0.861811	0.918228	0.983614	1.07959	1.03153	0.975844	0.144508
RL9_HUMAN	1.0358	0.974262	0.98943	0.938576	1.06307	0.958702	0.972375	1.04734	0.938792	0.952682	0.939779	0.907226	1.02469	1.20804	0.973355	0.974717	0.975975	1.04261	0.969264	1.07495	0.942442	0.985228	-0.111819
RLA0_HUMAN	0.901154	0.897643	0.914482	0.87432	1.02206	0.995333	0.949183	0.99925	0.927102	0.854688	0.95399	0.893685	1.05159	1.2585	0.963163	0.998092	0.957189	1.0218	0.92367	0.972963	0.961933	0.999427	-0.181774
RLA1_HUMAN	0.893055	0.805401	0.899334	0.933176	0.817696	0.890228	0.888838	0.88497	1.19691	1.19949	1.10524	1.23589	1.37947	1.65145	1.22829	1.07578	1.31136	1.25599	1.29426	1.68944	1.09459	0.887819	-0.42551
RLA2_HUMAN	0.899048	0.951652	1.00574	0.986341	1.14188	1.02161	1.08852	1.06385	1.08101	1.1013	0.970745	0.989032	1.18536	1.47354	0.944911	1.01872	0.933232	0.967222	1.08176	1.25167	1.00472	0.939566	-0.434568
RM01_HUMAN	1.15183	1.20265	1.21972	1.18797	1.01158	1.16158	1.00832	1.16096	1.54361	1.78609	1.44022	1.64733	1.61491	2.3311	1.12614	1.11138	1.22881	1.14886	1.10494	1.28972	0.925958	1.01552	-0.642278
RM04_HUMAN	1.18737	1.19543	1.11294	1.11481	1.04473	1.00903	1.08122	1.13041	1.21519	1.19751	1.16749	1.3379	1.41478	1.86949	1.00149	0.968047	1.14882	0.98326	0.941683	0.959974	0.920288	1.20335	-0.499941
RM10_HUMAN	1.57869	1.43125	1.38255	1.22563	1.41568	1.08618	0.880244	0.995126	1.47915	1.54635	1.59126	1.80529	1.51685	1.862	0.986932	1.05914	1.08463	0.878999	0.911416	0.957863	0.878975	1.1151	-0.560237
RM11_HUMAN	0.961486	1.17539	0.995061	0.917866	1.02853	1.21811	1.11218	1.22389	1.40079	1.15154	1.28263	1.33713	1.35621	2.1991	1.10845	1.11444	1.20579	0.913855	1.38048	1.14467	0.982899	1.15835	-0.58763
RM12_HUMAN	1.09774	1.19383	1.03033	1.18416	1.18561	1.36924	1.15922	1.25879	1.3504	1.07125	1.25257	1.3331	1.6917	2.68922	1.12619	1.03004	1.24252	0.996467	1.17071	1.32531	1.11898	1.15753	-0.529302
RM13_HUMAN	1.31696	1.18149	1.10524	1.16487	1.01008	0.908675	1.10105	1.08553	0.878479	1.14296	1.25998	1.41695	1.3361	1.99657	1.03598	1.01722	1.1162	0.97376	1.0988	1.00944	1.14309	1.3007	-0.583593
RM14_HUMAN	1.12944	1.13735	1.05318	1.18267	1.03845	1.20035	1.07876	0.967705	1.25	1.10234	0.975287	0.980007	1.18625	1.71785	1.05564	0.999813	1.01069	0.849173	0.917649	0.924209	0.967686	1.21157	-0.24967
RM15_HUMAN	1.31491	1.31021	0.964057	1.16335	1.07856	1.22057	1.15914	1.11047	1.35322	1.39759	1.26162	1.27632	1.61711	1.98435	1.203	1.10393	1.19279	0.9531	1.08889	1.11333	1.06814	1.16351	-0.443307
RM17_HUMAN	1.42503	1.31962	1.06119	1.19861	1.26527	1.15683	1.36949	1.23893	1.00027	1.18011	1.26056	1.49822	1.3797	2.07705	1.05954	0.995672	1.14138	0.95828	1.02418	0.893539	1.01913	1.10897	-0.50684
RM19_HUMAN	1.10887	1.20064	0.984526	1.11489	0.972285	0.942316	0.933089	0.8856	1.05458	1.2253	1.27943	1.43586	1.31166	1.58094	1.17085	0.931211	1.24456	1.14518	1.04995	1.15682	1.09997	1.24829	-0.606727
RM23_HUMAN	1.33875	1.41401	1.08497	1.14792	1.08371	0.933177	1.05726	1.10363	1.02411	1.3073	1.24236	1.71861	1.54719	2.4379	1.12333	0.991567	1.33375	1.41271	1.29449	1.91313	1.0976	1.09247	-0.607496
RM24_HUMAN	1.19474	1.28035	1.08088	1.17626	1.00523	1.07533	1.05588	1.04665	1.26363	1.01095	1.07007	1.17702	1.55039	1.69576	1.10231	1.0758	0.983764	0.743132	0.937111	0.947152	1.06657	1.11221	-0.281729
RM28_HUMAN	1.11183	1.16344	1.11882	1.07186	1.12157	1.20187	1.07074	1.12055	1.34508	1.14426	1.19967	1.27191	1.30204	2.01466	1.13279	1.07336	1.05052	1.02023	1.0038	0.94971	1.14978	1.35935	-0.474959
RM37_HUMAN	1.17822	1.2498	1.04098	1.14387	1.01532	1.06576	1.06914	0.947922	1.23221	0.967015	0.938275	0.996365	1.29859	1.44289	1.21976	0.995503	1.13138	0.946239	0.930177	0.696819	1.00794	1.23027	0.120115
RM38_HUMAN	1.22032	1.27838	1.16138	1.12595	1.04358	1.05596	1.08558	1.0091	1.20664	1.23706	1.18366	1.26585	1.54596	2.2518	1.16345	1.0333	1.07908	0.935264	0.672431	0.576074	1.05913	1.36965	-0.305705
RM41_HUMAN	1.07339	1.08757	1.12624	1.24611	1.24021	1.22096	1.17958	1.09294	1.35958	1.45245	1.2531	1.48964	1.36265	2.47123	1.06735	0.936736	1.05477	1.06908	1.04042	1.07683	0.645595	1.3319	-0.602619
RM44_HUMAN	1.38113	1.457	1.08268	1.30806	1.1194	1.15234	1.14862	1.14457	1.24849	1.21552	1.06826	1.23956	1.35712	1.8548	1.08093	1.0052	1.3917	1.04975	1.12295	1.15613	1.08864	1.31543	-0.298366
RM49_HUMAN	1.07183	1.15974	0.773918	0.979832	0.923852	1.14455	1.20568	0.916297	1.14145	1.08408	1.37072	1.4603	1.52148	2.26753	1.02899	0.978969	1.02941	1.01624	0.983118	1.24125	1.21538	1.20203	-0.636444
RM50_HUMAN	1.33847	1.21349	1.31388	1.29322	0.841292	0.757011	1.00848	1.11399	0.579779	1.07924	1.02603	1.63895	1.59566	2.26825	1.19729	1.07416	1.45744	1.02398	1.53209	1.41695	1.25204	1.15702	-0.478917
RM53_HUMAN	1.15384	1.74696	1.18717	1.54085	1.11775	1.23432	1.24858	1.31224	1.40736	2.59326	1.77447	2.70042	1.48628	1.497	0.977786	0.770401	1.36195	1.14467	1.41278	1.99405	1.05167	1.1663	-0.679743
RMD1_HUMAN	1.20358	1.17499	1.06004	1.18654	0.996525	1.0242	0.993715	1.01205	0.972139	0.894485	1.03134	0.891154	1.21348	1.2961	0.952564	0.939548	1.12846	1.06558	1.20841	1.10555	1.10752	1.17596	-0.0593404
RMD3_HUMAN	1.10944	1.01195	1.05751	1.03999	1.03934	1.00642	1.12645	1.07169	0.900557	0.938712	0.939712	0.687469	1.13109	0.85943	1.09385	0.910512	1.18175	1.0399	1.07508	0.861291	1.14086	1.03951	0.671635
RN213_HUMAN	0.872692	0.887603	0.70206	0.916676	0.911402	0.865796	0.932994	0.896597	0.71587	0.908766	0.999346	1.08272	1.10257	0.998466	1.29672	1.19823	1.15875	1.14112	1.10974	1.02286	0.969633	0.887134	0.0276859
RNPS1_HUMAN	1.06545	0.963949	0.948597	1.12294	1.06205	1.2869	1.13014	1.18298	1.13083	0.999196	0.843378	0.985912	1.41351	2.0295	1.12618	1.02546	1.24916	1.07463	1.34015	0.969455	1.10983	1.29342	-0.229657
RNT2_HUMAN	0.944825	1.00079	0.972411	1.02368	1.06204	1.03605	1.06129	1.13473	0.858686	0.91072	0.882646	1.04249	1.13163	1.13082	0.961646	0.881129	1.03044	0.930788	1.2963	1.5618	1.10155	1.13357	-0.269312
RO52_HUMAN	0.89785	0.929344	0.94783	0.934087	0.938543	0.980909	1.03734	0.931913	0.877055	0.860229	0.78166	1.15216	0.888125	0.943492	1.04533	1.09352	0.953284	1.05672	0.878524	1.22708	1.00391	0.902141	0.00990933
RO60_HUMAN	0.89754	0.985491	0.903048	0.909884	0.906826	0.903954	0.977741	0.916068	0.95282	1.02539	1.03101	0.938371	0.665247	0.40038	0.924907	0.942269	0.981168	0.930858	0.838952	0.622972	0.94709	1.01666	0.389043
ROA0_HUMAN	1.00463	1.1142	1.00069	1.06934	0.995587	1.05479	0.943907	1.05938	0.914167	0.860451	1.01445	0.996167	1.40371	1.26163	1.08695	0.995539	1.01617	1.03653	1.21778	1.25917	1.06142	1.14477	-0.214227
ROA1_HUMAN	0.974824	1.1059	0.974836	1.01456	1.05299	1.08307	1.05352	1.16983	0.968541	1.02585	1.03992	1.12314	1.3137	0.852725	1.07212	1.03603	1.09316	1.00945	1.3037	1.43941	1.12723	1.1936	-0.0748523
ROA2_HUMAN	1.05417	1.06621	1.0711	1.07463	1.07683	1.19513	1.04413	1.17337	1.09022	1.08871	1.15097	1.25293	1.27493	0.829929	1.05215	0.996941	1.082	0.980617	1.30258	1.60898	1.18577	1.16973	-0.272993
ROA3_HUMAN	1.06507	1.08923	1.02147	1.09049	1.07354	1.14297	1.02849	1.14514	0.959735	0.977113	0.942009	0.936489	1.42006	1.13339	1.10013	1.03183	1.09009	1.00255	1.27006	1.52645	1.12421	1.16755	-0.0372318
ROAA_HUMAN	1.00824	1.07833	0.953519	1.05769	1.01705	1.13056	1.02471	1.12067	0.919944	1.03184	1.00605	1.17904	1.26975	0.841188	1.10738	1.04667	1.16707	1.12021	1.34818	1.61513	1.11479	1.17931	-0.103143
ROCK1_HUMAN	0.935468	0.903997	0.832192	0.611148	0.975943	0.785112	0.87058	0.975053	0.849004	1.09342	1.11625	1.236	0.83258	0.759281	0.914435	0.976401	0.828499	1.0233	0.668866	0.541574	0.998319	0.817405	-0.0968303
RPA2_HUMAN	1.09368	1.15538	1.10591	0.944939	0.935069	0.972658	0.969131	0.999806	0.978251	0.93509	0.906307	0.762361	1.02604	0.642314	0.718079	0.817188	1.32716	1.28505	1.26982	1.48081	1.02793	1.3339	0.252251
RPAB1_HUMAN	0.959777	0.976719	0.919182	1.00461	1.031	0.945807	0.839779	1.12043	1.17214	0.93216	1.23966	1.22554	1.22847	1.56427	0.841576	0.96798	0.671906	0.903013	1.10465	1.21207	1.27846	1.06927	-0.662102
RPAB3_HUMAN	1.1425	1.03672	1.23692	1.13409	1.3203	1.38971	0.900651	1.13642	1.03191	0.829023	1.0652	1.03135	1.14572	1.16336	0.915142	0.862056	0.857354	0.817403	0.844601	0.90206	0.833661	0.966711	-0.194497
RPAC1_HUMAN	1.03086	1.13574	0.919263	0.901158	1.16951	1.22338	1.08581	1.07134	0.948789	0.827543	1.03458	1.03195	1.10285	1.36807	0.950743	0.985017	0.845833	0.90057	1.00552	1.01391	1.00884	1.14205	-0.347477
RPB1_HUMAN	1.02886	0.973106	0.623154	1.02961	1.00634	1.05794	0.829904	0.987468	1.02868	1.00801	0.941263	0.963236	0.902254	0.796909	0.991672	0.972006	1.1458	1.01656	1.08882	0.870833	1.16766	1.09383	0.245719
RPB2_HUMAN	0.91679	0.950869	0.91965	0.978293	0.980685	1.0747	0.974747	1.0357	1.00847	0.909422	0.798952	0.807373	0.9541	0.838692	1.00308	1.02576	1.01217	0.991616	0.883192	0.802215	0.971707	0.991848	0.783848
RPB3_HUMAN	1.00987	1.10832	0.95793	1.05112	1.16703	1.1615	0.945025	1.15948	1.12184	1.1325	1.09187	1.09115	1.35293	1.96884	1.04976	1.11283	0.96329	0.9444	1.09958	1.23104	1.12767	0.992129	-0.50102
RPE_HUMAN	0.919394	1.00135	0.889683	1.00984	1.03097	0.971163	1.01494	1.02625	0.956471	0.885258	0.821567	0.872867	0.758587	0.631712	0.904533	1.06475	0.74086	0.928487	0.714581	0.735552	0.81083	0.779303	0.5076
RPF2_HUMAN	1.15801	1.0643	0.986081	0.922019	1.15483	1.13206	1.10311	1.0316	1.24701	1.21655	1.19134	1.06302	1.05729	0.951649	0.908219	0.812949	1.15932	1.05806	1.36695	1.04546	0.966563	1.24604	-0.189085
RPN1_HUMAN	1.18623	1.22132	1.07531	1.05293	1.0399	1.11976	1.06095	1.03388	1.10526	0.934584	0.996389	1.08551	1.20328	1.23345	1.05181	0.968796	1.10745	0.881342	1.05458	0.770731	0.957532	1.13017	-0.0159835
RPN2_HUMAN	1.13934	1.18385	1.09221	1.02678	1.04995	1.1344	1.09835	1.02621	1.14826	1.04611	1.09921	1.10761	1.21246	1.36523	1.05044	1.00382	1.0822	0.860528	0.990816	0.670925	0.86342	1.00497	-0.18755
RPP30_HUMAN	1.06951	0.888508	1.10235	1.01306	0.924397	0.937192	0.818669	0.919964	1.11628	0.835474	1.05279	1.12481	1.39614	1.25219	1.2435	1.16008	0.988091	0.984926	1.04696	0.88865	0.977531	1.17719	-0.110837
RPR1B_HUMAN	0.955322	0.939727	0.886208	0.880369	0.991316	1.00752	0.862942	0.907323	1.1025	1.02022	1.15475	1.16119	0.754623	0.691005	0.962172	0.925873	0.924693	0.946096	0.992435	1.52441	1.01465	1.14122	-0.262219
RPRD2_HUMAN	1.16294	1.07449	1.10062	1.02593	1.02411	0.883203	1.04987	1.16077	1.14249	1.10465	1.12594	0.743814	0.76036	1.01153	0.829524	0.798768	1.18503	1.00923	1.09953	1.32626	1.49646	1.13634	0.0795001
RRAGA_HUMAN	0.846124	0.904783	0.953708	1.00969	0.778027	0.823486	0.697327	0.791728	0.818774	1.38183	1.21995	1.25274	1.13701	1.59491	0.852869	1.18155	0.963283	0.924952	1.09153	0.616042	1.08939	0.921772	-0.539607
RRAGC_HUMAN	1.03405	0.784754	0.952739	0.943978	0.88501	0.865944	0.887066	0.857992	0.849661	1.01008	0.890738	1.17592	1.19615	1.90131	0.856406	1.07255	0.956992	1.06748	0.913977	0.982518	0.895113	0.931361	-0.48609
RRAS_HUMAN	1.07609	1.00408	0.890652	1.07174	1.03993	1.07531	1.09076	1.0097	0.978734	0.954213	0.938755	1.05736	0.980012	0.946844	0.916566	0.968564	0.933707	0.958985	0.950324	0.683306	0.96175	1.09907	0.132195
RRBP1_HUMAN	1.01812	1.09664	1.26079	1.09836	1.02305	1.07956	0.992113	1.05366	0.866806	0.780789	0.498623	0.272296	0.774669	0.756801	1.08929	1.07987	1.22942	0.960223	0.996553	0.359335	1.05781	1.08449	0.76475
RRP1_HUMAN	0.983298	1.04982	0.976856	0.993909	0.781118	0.994332	1.01736	1.00383	1.38301	1.06444	1.3521	1.17961	1.07289	0.773055	1.17336	1.03897	1.80926	1.39962	1.74012	1.14276	1.17339	1.21221	0.0435108
RRP12_HUMAN	1.09886	0.981751	1.06705	0.993633	1.01633	0.999588	0.9559	0.994907	1.04435	1.05232	0.993468	0.823431	0.805513	0.563917	0.951357	0.943448	1.08075	0.910038	0.874639	0.215915	0.938542	0.969271	0.458141
RRP15_HUMAN	0.932144	1.03245	0.988433	1.14792	1.07708	1.26283	1.06426	1.08057	1.2127	1.10929	0.974225	0.930409	1.07081	0.562547	0.990509	0.912248	1.0554	0.854002	1.09878	1.10897	1.13261	1.23915	0.28297
RRP8_HUMAN	1.19666	1.0844	0.93645	1.19075	0.906337	0.956916	0.910012	0.930461	0.974882	0.763772	0.984503	0.787662	0.879899	0.648345	1.03605	1.00192	1.07696	0.930624	0.825689	0.583464	1.03633	1.13523	0.588439
RRS1_HUMAN	1.09929	1.05966	1.04762	1.08845	1.07198	1.15725	0.967679	1.15148	1.15228	1.03796	1.22375	1.11777	1.20304	0.900649	0.983306	0.961978	1.00845	0.935874	1.10682	0.953435	1.07913	1.08725	-0.209534
RS10_HUMAN	0.970382	0.922513	0.996163	0.968556	0.973831	0.908747	0.967388	0.983905	0.885368	0.816075	0.954699	0.96592	0.95963	1.06133	0.944334	1.01981	0.867244	0.936597	0.886808	0.72282	0.992559	0.9606	0.0567186
RS11_HUMAN	0.819089	0.816948	0.950544	0.844177	0.934293	0.917369	0.977485	0.925258	0.98827	0.922039	0.893353	0.762949	0.847158	0.915091	0.883932	0.967863	0.862521	0.894103	0.926289	0.965842	0.868229	0.85051	0.228012
RS12_HUMAN	0.788281	0.786844	0.872872	0.865027	0.919497	0.911726	0.94159	0.903253	0.983225	0.927802	0.80478	0.848711	0.850628	0.861194	0.934823	0.944021	0.852528	0.882278	0.915741	1.13523	0.929466	0.978748	0.120833
RS13_HUMAN	0.918761	0.92716	0.930965	0.86974	0.910927	0.848581	1.02935	0.937982	0.869579	0.648668	0.70633	0.551708	0.797409	0.552327	0.891221	0.98595	0.960024	0.964538	0.83139	0.86224	0.845802	0.893317	0.871421
RS14_HUMAN	0.877903	0.918349	0.962577	0.927488	0.981323	0.928999	1.02727	0.91702	0.846366	0.632779	0.725467	0.689507	0.889995	1.07946	0.924416	0.968663	0.866314	0.923485	0.841897	0.768557	0.99162	0.926177	0.449543
RS15_HUMAN	0.948842	1.06352	1.09216	1.06088	1.17056	1.24907	1.34693	1.17618	0.879363	1.10766	0.788603	0.761494	1.08316	0.919185	0.961457	0.934563	1.03103	0.934682	0.960138	1.11909	0.938455	0.888258	0.337211
RS15A_HUMAN	0.948547	0.868699	0.918946	0.908491	0.913219	0.884996	0.900105	0.852416	0.769583	0.755079	0.737029	0.731112	0.913419	1.04663	0.948846	0.97541	0.878143	0.882381	0.876133	0.753334	0.932529	0.96846	0.415426
RS16_HUMAN	0.961841	0.875913	0.884801	0.92032	0.896649	0.86216	0.878967	0.754007	0.866921	0.612806	0.785792	0.706738	0.882237	1.09139	0.841762	0.924996	0.928257	0.96472	0.887235	0.829924	0.829467	0.89366	0.265106
RS17_HUMAN	1.00832	1.03406	1.03334	1.06963	1.04984	0.995758	1.02945	0.986149	0.988427	0.762689	0.855766	0.770377	1.01071	1.04155	0.9417	0.993245	0.906973	0.99792	0.93365	0.95197	0.885296	0.916543	0.45546
RS18_HUMAN	0.910584	0.902451	0.975191	0.910451	0.974139	0.929046	0.958616	0.975563	0.79086	0.719507	0.782031	0.654997	0.853443	0.754959	0.915399	0.997622	0.87515	0.897583	0.910278	0.890165	0.945784	0.912534	0.715059
RS19_HUMAN	0.961487	0.926489	1.00921	0.994976	0.982231	1.03715	1.0394	1.01724	0.832493	0.701081	0.774818	0.788435	0.795791	0.732989	0.927459	0.98696	0.897188	0.909852	0.894874	0.870459	1.02879	0.996875	0.603626
RS2_HUMAN	0.868991	0.855683	0.867532	0.831882	0.900207	0.848628	0.992691	0.955097	0.934353	0.730039	0.819003	0.744833	0.865368	0.869885	0.930372	1.0071	0.936469	0.904429	0.822876	0.772536	0.923996	0.920604	0.699798
RS20_HUMAN	0.937877	0.951035	1.01349	0.928631	0.934652	0.940347	0.943109	0.848928	0.834269	0.753918	0.879314	0.823874	0.917829	1.00019	0.957523	1.01713	0.892199	0.893342	0.817246	0.753074	0.992696	0.93275	0.370794
RS21_HUMAN	0.937595	0.930673	0.982736	0.921547	0.946865	0.93673	0.965456	1.01024	0.990346	0.82038	0.912538	0.82422	0.863473	0.672814	0.94987	0.985572	0.900688	0.911818	0.972947	1.06328	1.1339	1.01004	0.497486
RS23_HUMAN	0.872624	0.914442	0.943439	0.895507	0.881543	0.81373	0.811616	0.698922	0.686103	0.728339	1.06532	0.982503	0.895296	0.986667	0.842953	0.780538	0.872999	0.859594	1.0391	1.0937	0.906171	0.903243	-0.515903
RS24_HUMAN	0.871392	0.915567	0.926932	0.896971	0.827203	0.842844	0.993305	0.830206	0.879225	0.765616	0.704126	0.702124	1.01409	1.10643	0.963728	0.953668	0.903705	0.884675	0.891724	0.822106	0.989304	0.909914	0.407214
RS25_HUMAN	0.870869	0.83485	0.870101	0.872141	0.875757	0.855059	0.928583	0.854318	0.869123	0.679168	0.823551	0.727109	0.910881	0.876172	0.874566	0.951476	0.836698	0.84199	0.825483	0.78684	0.911228	0.912637	0.543383
RS26_HUMAN	0.949148	0.937966	0.954781	0.863135	0.894464	0.912494	0.89587	0.986605	0.917296	0.839256	0.929247	0.893207	1.05092	1.04509	0.956672	1.09138	0.847475	0.913862	1.04138	1.00645	0.878989	0.915327	-0.0379614
RS27_HUMAN	0.881755	0.799035	0.935549	0.931675	0.877526	0.94543	0.832128	0.762798	0.892828	0.761781	0.734354	0.781663	1.08815	1.18924	1.04044	1.02583	0.830002	0.969429	0.915951	0.547136	1.06859	1.02995	0.21538
RS27A_HUMAN	0.911107	0.881951	0.875794	0.883978	1.02705	1.10122	1.04787	0.953617	1.23635	1.26962	1.37117	1.34314	0.804129	0.928067	0.862239	0.960141	0.747232	0.989794	1.03613	1.63233	0.872037	1.04444	-0.580159
RS28_HUMAN	0.814092	0.91079	0.834074	0.839928	0.96237	0.921725	0.910903	0.913065	0.830676	0.679733	0.760046	0.776476	0.736325	0.562406	0.889227	0.916753	0.87775	0.925314	0.868065	0.99484	0.956492	0.957544	0.565439
RS3_HUMAN	0.914374	0.878488	0.885115	0.883989	0.957705	0.896546	0.888315	0.906676	0.822709	0.791865	0.793225	0.718708	0.910073	1.12026	0.947435	0.965721	0.890312	0.938047	0.90182	0.994828	0.947399	0.990249	0.219226
RS30_HUMAN	0.70115	0.605012	0.846247	0.865557	0.962832	0.728972	1.03045	0.931249	0.957698	0.560095	0.826816	0.565511	0.736689	0.706811	0.877185	1.02215	0.522774	0.74637	0.782332	0.782259	1.18161	1.27741	0.337509
RS3A_HUMAN	0.882831	0.864473	0.97784	0.905493	0.919921	0.870848	0.974307	0.938166	0.928541	0.809916	0.893201	0.824104	0.937106	0.908904	0.888739	0.975286	0.913349	0.940033	0.885966	0.784141	0.954066	0.923636	0.527386
RS4X_HUMAN	0.843196	0.83884	0.879222	0.799115	0.930161	0.839403	0.992925	0.906863	1.02781	1.01374	0.893657	0.837629	0.852323	0.990722	0.887685	0.940374	0.90672	0.940893	1.00878	1.00485	0.923217	0.938497	0.00248546
RS4Y1_HUMAN	1.11243	1.02599	1.10261	1.01779	0.87836	0.726314	0.945784	0.890982	0.837133	1.32912	1.25187	1.04757	0.954374	1.06925	1.06696	0.950454	1.00811	1.01995	1.17161	1.20597	0.912049	0.960052	-0.389412
RS5_HUMAN	0.952947	0.871366	0.85014	0.825964	0.921733	0.88938	0.976531	0.929582	0.935831	0.837941	0.798665	0.790176	0.864816	1.08323	0.928793	0.998967	0.881613	0.913207	1.01389	0.942476	0.874583	0.915791	0.192668
RS6_HUMAN	0.901988	0.928131	0.992933	0.954522	0.952619	0.957884	0.933701	0.951363	0.944104	0.747853	0.90758	0.785184	0.951088	0.796723	0.866707	0.898713	0.881312	0.897271	0.949641	0.959381	0.905879	0.935128	0.437112
RS7_HUMAN	1.00187	1.00709	1.04209	1.01582	1.02548	0.937197	1.04335	1.02723	0.915326	0.906033	1.02935	1.03802	1.00615	1.21874	0.950194	0.965199	0.926723	0.970544	0.998371	1.05591	0.913922	0.932785	-0.516247
RS8_HUMAN	0.844148	0.87785	0.872298	0.838382	0.963246	0.988756	0.995434	0.959287	0.897204	0.812721	0.897755	0.777369	1.04283	0.886717	0.965882	0.957776	0.797369	0.829881	0.924845	0.952506	0.953341	0.969176	0.270667
RS9_HUMAN	0.887069	0.813217	0.841079	0.794561	0.867815	0.79603	0.872646	0.829925	0.764617	0.702978	0.754607	0.693527	0.880601	0.908793	0.878572	0.938709	0.88572	0.885374	0.903623	1.00493	0.893007	0.897482	0.381113
RSF1_HUMAN	1.07165	1.04504	1.16109	0.963483	1.00343	1.11761	0.874663	1.10537	1.16268	1.0638	1.45025	1.11717	1.02828	0.975132	1.01956	1.04066	0.968114	0.846592	1.26487	1.22058	0.982678	0.870778	-0.504967
RSMB_HUMAN	1.0246	1.05655	1.08598	1.09546	1.05821	1.08959	1.05785	1.10753	0.909459	0.947032	0.819397	0.787528	1.18874	1.1991	1.06135	1.02658	1.01545	0.963518	1.15762	1.31519	1.14008	1.21949	0.15121
RSSA_HUMAN	0.885702	0.893545	0.82881	0.849346	0.921378	0.873295	0.942519	0.914249	0.874168	0.852591	0.917832	0.979191	0.848242	0.786536	0.917919	0.962531	0.932819	0.983304	1.00331	1.29733	0.939293	0.970352	-0.0463338
RSU1_HUMAN	0.912608	0.841571	0.950769	0.935943	1.02807	0.983719	1.0617	0.98649	1.05741	1.22203	1.05328	1.02016	0.815699	0.653152	0.900022	0.968713	0.89408	1.04195	0.802378	0.982774	0.859556	0.806669	0.0569073
RT07_HUMAN	0.963626	1.02719	0.675956	1.03298	1.08013	0.982941	1.054	1.05664	1.29951	1.07918	1.03391	0.917951	1.28229	1.41383	1.17	1.17756	1.11709	0.965139	0.403261	0.621328	1.1013	1.3763	0.151253
RT17_HUMAN	1.07591	1.18942	1.16671	1.13979	1.00502	0.903255	1.00169	0.95592	1.02136	0.985988	0.858602	1.05186	1.52289	1.61275	1.29475	1.40035	0.921838	0.816467	0.761133	0.543775	0.983189	1.06986	0.0747287
RT22_HUMAN	1.35062	1.08657	0.900571	1.03232	1.24471	1.3492	1.35008	1.19412	1.71986	1.42671	1.35881	1.50433	1.9187	3.2179	1.26222	1.08092	1.04614	0.964146	1.0022	1.16877	1.16484	1.17745	-0.495427
RT29_HUMAN	1.22689	1.2586	0.967842	1.08809	1.08395	1.22098	1.15538	1.1457	1.33431	1.23947	1.25525	1.81483	1.47071	1.66996	1.22211	1.17532	1.25646	1.04716	1.06433	0.712107	1.14162	1.32746	-0.455819
RT30_HUMAN	0.953893	1.10212	0.98066	0.948556	1.07889	1.13469	1.37062	1.15116	1.44494	1.37558	1.18051	1.14786	1.53385	1.4179	1.33387	1.02397	1.28297	1.26272	1.29452	0.975661	1.37904	1.15528	-0.0679327
RT34_HUMAN	1.14577	1.17387	0.907672	0.966703	0.999623	0.905369	1.1713	0.906025	1.06549	0.915879	1.04791	1.08208	1.25514	1.81658	1.15679	1.02716	1.16657	0.955409	1.00531	1.009	1.06394	1.31735	-0.259141
RT35_HUMAN	1.2957	1.434	1.08976	1.23691	1.10333	1.09041	1.14908	1.13881	1.50434	1.22555	0.943112	1.31047	1.42741	2.03981	1.13713	1.06746	1.3811	1.02751	1.2187	1.11405	0.963219	1.00598	-0.275625
RTCA_HUMAN	1.10961	0.978987	0.997216	1.06298	0.897297	0.820683	1.00242	0.865954	1.14726	1.08408	1.06931	1.26548	0.740474	0.660594	0.872694	0.97465	0.851189	1.0274	0.729553	0.718337	0.936292	0.899212	0.018504
RTCB_HUMAN	0.942669	0.889679	0.91617	0.90997	0.950241	0.933537	0.954402	0.936543	1.00777	0.987437	0.897725	0.969491	1.11661	1.19246	0.994322	1.01109	0.98418	0.994716	1.06549	1.31579	0.969375	1.00708	-0.27379
RTN4_HUMAN	0.928265	0.973316	0.982773	0.907515	1.0199	1.09052	1.03956	1.03688	1.03221	1.02589	0.953216	0.943477	0.959499	0.898604	0.963545	0.997067	1.09868	0.943333	1.15051	0.943568	1.05483	1.08973	0.235239
RU17_HUMAN	1.08712	1.09908	1.07404	1.09549	1.11439	1.22059	0.989796	1.13877	1.06824	1.07299	1.06495	0.965708	1.13956	0.901144	1.0457	1.01991	1.04191	0.889579	1.24488	1.20662	1.15907	1.111	0.0397154
RU1C_HUMAN	1.05344	1.06947	1.12693	1.154	1.07611	1.12384	1.01002	1.16389	1.09766	0.998015	0.941983	0.858747	1.17299	0.746189	1.04846	1.01181	1.13721	1.05774	1.30743	1.59197	1.10542	1.0826	0.229325
RU2A_HUMAN	1.01239	1.03396	1.00853	0.991137	1.07464	1.13254	0.956848	1.00189	1.09066	1.04691	1.10986	1.13843	1.15576	1.17109	1.05633	1.01195	0.991729	0.92958	1.14532	1.26526	1.03338	1.09006	-0.653047
RU2B_HUMAN	1.12551	1.07658	1.05451	1.19555	1.05781	1.01979	1.04736	0.978198	0.690254	1.10661	0.941839	0.767704	1.10822	1.06911	0.989038	0.961935	1.14374	1.00876	1.33695	1.38449	1.14546	1.10731	0.0407897
RUFY1_HUMAN	0.997972	0.990928	1.08517	0.991492	1.08269	1.0951	1.03226	1.06255	0.919965	0.964977	1.03049	0.872462	1.0691	0.890707	0.980869	1.00906	1.02636	0.964485	0.868827	0.690261	1.01581	1.00858	0.412812
RUNX3_HUMAN	1.10448	1.13221	0.982082	0.942818	0.895367	0.807458	0.853786	0.882	0.950101	0.742953	0.793704	0.767765	0.930788	0.971187	0.897296	0.883248	0.992532	0.862643	1.04043	0.934003	0.953806	1.11486	0.38222
RUVB1_HUMAN	0.959794	0.962674	0.921263	0.938474	0.993319	1.00184	0.964442	0.975305	1.05298	0.935413	1.02052	1.11906	1.12544	1.51195	0.974492	1.00123	0.936336	0.936147	1.04876	1.22725	0.938803	1.00253	-0.617466
RUVB2_HUMAN	0.96003	0.936842	1.01515	0.95302	0.945655	0.985343	0.946933	0.980938	0.956243	0.874926	0.949312	0.988735	1.15309	1.70661	0.987086	0.984371	0.948174	0.992353	1.05621	1.25558	1.09266	1.09736	-0.444103
RUXE_HUMAN	0.963319	0.976033	0.975163	0.949474	1.09543	1.25375	1.01238	0.998034	1.29457	1.11928	1.07945	1.13055	1.00008	1.0055	1.05542	0.978132	1.09726	1.11032	1.16131	1.53459	1.06428	1.09438	-0.278079
S10A4_HUMAN	0.944519	0.904561	0.988512	1.0348	1.01332	0.890641	0.957075	0.951115	0.807999	0.75303	0.823739	0.733931	0.721884	0.711586	0.837946	0.944934	0.669049	0.950195	0.598696	0.610545	0.820928	0.77402	0.474353
S10A6_HUMAN	0.876483	0.750764	0.768347	1.01877	0.857315	0.696092	0.964955	0.881567	0.944386	1.06261	1.01509	1.10213	0.682234	0.49656	0.998325	1.06352	0.905143	1.10189	0.709041	0.778459	0.992663	0.731899	0.206516
S10AA_HUMAN	0.970143	1.10799	0.927683	1.10917	0.92012	1.0691	0.95703	1.01738	1.09299	1.27773	0.812393	0.854533	0.994264	0.80391	0.909149	0.969471	1.02303	0.991396	1.2015	1.18457	0.984346	0.993718	0.230721
S10AB_HUMAN	0.903868	0.833526	0.952805	0.853197	0.876238	0.867866	0.927236	0.874127	0.855731	0.881257	0.834109	0.700084	0.806056	0.795324	0.892002	0.975518	0.836835	1.01652	0.856414	0.890212	0.998553	0.821296	0.619066
S23IP_HUMAN	1.28103	0.958544	1.09786	1.0189	0.948675	1.00131	1.03318	1.17163	0.884711	1.14836	0.963267	1.07742	0.969928	0.896476	0.981741	0.99075	0.826922	0.962329	0.76568	1.08854	0.977246	0.945107	-0.00246015
S30BP_HUMAN	1.00658	1.04884	1.28075	1.22307	1.43624	1.21076	1.03781	1.17436	1.12417	1.07487	1.166	1.30248	0.962451	0.876552	1.02903	0.961063	0.967197	0.952369	1.05895	1.37529	0.882321	0.978334	-0.294434
S35B2_HUMAN	0.774822	1.5554	1.13799	0.873825	0.947471	0.96511	0.899389	0.914492	1.21762	0.819139	0.842898	0.687957	1.14195	1.83733	0.973855	0.981726	1.09695	1.21981	1.3807	1.16861	1.03492	1.30592	-0.0470709
S39A7_HUMAN	1.01829	0.916694	0.960577	1.04244	0.924927	1.05816	0.921388	1.08518	1.0219	1.22677	1.25081	0.864063	1.37576	1.46983	1.34141	1.05793	1.23331	1.0437	1.19029	0.797485	1.12555	1.00558	-0.136099
S43A3_HUMAN	0.881697	0.884382	0.973986	0.678384	1.14798	1.2688	1.08593	1.05726	1.21389	0.933072	0.848605	0.998351	0.933802	0.783974	1.13945	0.966905	0.971151	0.994225	0.785424	0.618573	0.980363	1.06451	0.353172
S4A7_HUMAN	1.16795	1.14972	1.2015	1.18716	1.14915	1.21265	1.13356	1.18154	1.4141	1.14569	1.14416	1.04579	1.21928	1.03862	1.0489	0.99487	1.15628	1.1219	0.891939	0.506166	0.879627	0.952639	0.21668
S61A1_HUMAN	1.15376	1.14314	1.10729	1.00375	1.01472	1.03736	1.01536	0.99281	1.09443	1.02656	0.837125	0.924604	1.36356	1.45284	1.25334	1.15407	1.14229	1.03124	1.14326	0.77428	1.12468	1.04549	0.203567
SAC1_HUMAN	1.1784	1.13791	1.10898	1.04055	1.09064	1.05659	1.09921	1.06352	1.01063	0.901927	0.8968	1.01012	1.05035	1.12493	1.04174	0.988109	1.03575	0.835169	0.964817	0.718809	0.901555	0.90866	0.198073
SAE1_HUMAN	0.954358	0.926086	0.97445	0.993952	0.982764	0.946007	0.998642	0.961326	0.991258	0.965995	1.01132	1.12328	0.854612	0.661857	0.912696	1.01418	0.950636	1.03284	0.886567	1.00914	0.86674	0.903904	0.0847392
SAE2_HUMAN	1.0013	0.870786	0.818597	0.886312	0.933715	0.924304	0.952709	0.892796	0.926674	0.958557	0.959541	0.968411	0.852042	0.660641	0.990208	1.01252	0.902233	1.00633	0.808923	0.811425	0.958308	0.980482	0.418675
SAFB1_HUMAN	0.940071	0.99913	0.991369	1.06632	1.0315	1.25614	1.03929	1.22906	1.04248	1.0572	1.07037	1.0754	1.33404	1.0141	1.13334	1.10147	0.950634	0.965758	1.21421	1.43991	1.02695	1.13379	-0.231593
SAFB2_HUMAN	0.936391	0.978902	0.83859	0.957493	1.07675	1.18218	0.932133	1.11035	1.17106	1.02526	1.21163	1.14263	1.23505	0.923993	1.01151	1.03067	0.937029	0.868286	1.15755	1.25047	0.913164	0.984948	-0.406392
SAHH_HUMAN	0.916536	0.905394	0.958543	0.916663	0.989401	0.908345	0.971955	0.940449	0.888743	0.841871	0.913234	0.851494	0.749755	0.688309	0.913579	0.974834	0.838829	0.934783	0.72089	0.662114	0.984531	0.904862	0.530058
SAHH2_HUMAN	0.976502	0.875855	0.985178	0.945229	1.05076	0.936258	0.992981	0.973552	1.1409	1.28962	1.13474	1.22359	0.894182	0.8687	0.969471	1.08532	0.950149	0.920845	0.765938	0.848067	0.849799	0.865286	-0.197264
SAM50_HUMAN	1.15895	1.09011	1.05615	0.990642	0.925894	0.734634	0.937119	0.827138	1.0822	0.929486	0.724939	0.806963	1.17109	1.20977	1.1197	0.999878	0.933672	0.813638	0.837447	0.573769	0.928353	1.06558	0.361104
SAM9L_HUMAN	2.00734	0.994178	1.36798	0.951425	0.900421	0.887527	0.955164	1.00534	0.446902	0.627087	0.899944	0.738633	1.21906	1.48799	1.12606	1.04461	1.2272	1.1744	1.32314	1.30407	1.06	1.07982	0.0723558
SAMH1_HUMAN	0.935902	0.886319	0.969477	0.954331	0.934656	0.929862	0.973381	0.914486	0.898983	0.934778	0.953278	0.885017	0.872773	0.946805	0.963083	0.936369	0.927055	0.970772	0.839568	0.919878	0.956337	0.944865	0.253202
SAP_HUMAN	1.13439	1.16402	1.17461	1.26169	1.06385	1.23514	0.92426	1.05829	1.12794	1.09167	0.922393	1.01841	1.23056	1.46053	1.07719	1.04642	1.04565	0.990957	1.55965	1.78085	1.16924	1.23993	-0.30144
SAP18_HUMAN	1.16227	1.10728	1.07702	1.25393	1.07049	1.30571	0.946043	1.14681	1.05109	1.10615	1.08868	1.08469	1.21695	1.50382	1.03639	1.05798	1.0154	0.965596	1.15649	1.27996	1.2487	1.23642	-0.48947
SAP3_HUMAN	0.958932	1.10575	0.935301	1.00924	0.936385	1.00011	0.952196	0.992763	0.971551	0.794293	0.89926	1.08226	1.13331	1.37451	0.949804	0.95303	1.15669	0.997856	1.43479	1.57621	0.926556	1.00773	-0.35039
SAR1A_HUMAN	0.989348	1.12185	0.986416	1.05177	1.09813	0.931441	1.05291	0.994752	1.04947	1.00586	0.966013	0.988668	0.691504	0.60816	0.922001	0.922774	0.932122	0.92186	0.888717	0.956382	0.877255	0.84804	0.311163
SAR1B_HUMAN	0.941373	1.15794	1.15229	1.0245	1.05256	1.04108	1.11463	1.13364	1.17444	1.09423	1.01962	1.04947	0.810037	0.733209	1.12605	1.07796	0.8174	0.92493	0.882925	0.911276	0.849906	0.798865	0.238259
SARNP_HUMAN	1.03972	0.957231	1.02691	0.95966	0.98368	1.05726	0.905339	1.02874	1.01361	0.893937	1.01308	0.894683	0.970568	0.738391	1.01523	1.00062	0.984611	0.951041	1.11493	1.18281	1.20902	1.21271	0.243414
SART3_HUMAN	0.946815	0.965364	0.940752	0.955782	1.06114	1.12711	0.915202	1.00579	0.849225	0.697541	0.83231	0.794249	0.8148	0.66225	0.990495	0.938722	1.03572	0.955087	0.979833	0.483815	1.0125	1.14161	0.530816
SAS10_HUMAN	1.27733	1.34124	1.48395	1.27732	1.15586	1.37285	1.07423	1.17616	1.55872	1.11721	1.3932	1.31153	0.892628	1.14254	0.926594	0.846725	0.909797	1.02635	1.25292	0.933215	0.905431	1.02659	-0.325547
SATB1_HUMAN	1.27867	1.19286	0.99257	1.12062	0.959934	0.955176	0.980159	1.03326	0.98328	0.851538	0.825334	0.90627	1.24237	0.817873	1.15565	0.985055	1.16663	1.05813	0.657431	0.808701	1.32105	1.35709	0.57566
SATB2_HUMAN	0.924162	0.824181	0.70378	0.797766	0.877078	0.860084	1.61858	0.962559	1.0744	1.11417	1.38835	1.05718	1.38034	0.708287	1.58723	0.998836	1.24967	1.08165	1.12944	1.32806	1.54672	0.883806	0.100857
SC11A_HUMAN	1.08612	1.09081	1.11228	0.977752	0.898832	0.894381	0.995028	0.86575	1.09161	0.843493	0.958663	0.997648	1.05741	0.994486	0.959853	0.904954	0.980862	0.89495	0.763355	0.533147	0.817987	0.989699	0.207549
SC16A_HUMAN	1.01501	0.998197	0.874596	0.94832	0.884293	0.846995	0.902491	0.953936	0.870843	1.10684	0.840648	0.870712	0.982146	1.23184	0.965053	1.12005	0.882449	1.03201	1.19108	1.24774	0.951778	0.986795	-0.142541
SC22B_HUMAN	1.13795	1.11424	1.15205	1.08861	1.04767	1.16677	1.02791	1.02405	1.1696	0.998115	0.980498	1.04513	1.01894	0.967608	0.974939	0.957407	1.04015	0.889678	1.14595	0.930978	0.939648	1.06266	0.0582192
SC23B_HUMAN	0.982239	0.96261	0.852312	0.98537	1.01531	0.951629	1.01239	0.985287	0.957096	1.08845	1.0629	1.11142	0.915334	0.977316	0.925265	0.972636	0.889755	0.981291	0.908505	1.14634	0.929949	0.909088	-0.508699
SC24A_HUMAN	0.921525	0.859685	1.1356	0.981394	0.926893	0.868341	0.922708	0.889916	0.961369	1.46391	1.26066	1.44974	0.942244	1.00836	1.08761	1.1473	0.987968	0.919459	0.902952	1.28318	0.997104	0.957882	-0.541945
SC24B_HUMAN	1.07402	0.986996	1.12479	1.09671	0.922684	0.730873	0.879307	0.793532	0.856466	1.21642	0.88965	1.03336	0.961418	0.891278	0.919683	1.00152	1.0802	1.10752	1.12999	1.577	1.02158	1.01326	-0.0826299
SC24C_HUMAN	0.891076	0.867784	1.00573	0.881502	0.956933	0.865395	0.975035	0.848867	1.14283	1.10845	1.02059	1.13631	0.832897	0.925808	1.01324	1.00582	0.850488	0.930769	0.878718	0.942012	0.8359	0.905291	-0.256118
SC24D_HUMAN	0.834283	0.995698	0.849643	0.920177	1.0428	0.965287	1.15972	1.00726	1.04002	1.32223	1.13475	1.01486	0.814197	0.840712	1.10373	1.00272	0.942885	1.01127	0.925466	1.1084	0.88133	0.854438	-0.0743617
SC31A_HUMAN	0.935727	0.771908	0.879509	0.86368	0.996441	0.917186	0.981219	0.94798	0.933835	0.955997	0.918434	0.921058	0.918482	1.0039	0.960029	1.02251	0.892935	0.975648	0.936953	1.21656	0.984611	0.891485	-0.126854
SC61B_HUMAN	1.28776	1.31416	1.56173	1.22633	1.49294	1.41422	1.52836	1.47951	1.13292	0.750226	0.760963	0.84379	1.27128	1.05378	0.477128	0.705063	1.13298	0.769796	0.914342	0.926615	1.12323	0.905674	0.184575
SCAF8_HUMAN	0.937096	1.10473	0.984262	0.997416	1.13152	1.0854	0.952468	1.06289	1.01744	1.24786	1.29632	0.972827	0.773751	0.931176	0.88533	1.08804	0.90985	1.03006	1.13137	1.20185	1.18496	1.27438	-0.248792
SCAFB_HUMAN	1.32795	1.34343	1.28172	1.3699	1.24837	1.29789	1.07701	1.3091	1.01106	0.78327	0.83425	0.727899	1.01933	0.793954	1.04602	1.04639	0.976258	0.893151	0.949628	0.925162	1.01838	0.840028	0.510374
SCAM2_HUMAN	0.952647	0.945682	0.983377	0.984045	0.972829	0.991348	1.04351	1.0024	1.06046	1.1039	1.13986	1.19346	1.104	1.00207	0.979115	0.970835	1.05715	0.950311	1.0204	0.813145	1.08354	1.03482	-0.383425
SCAM3_HUMAN	0.891339	0.89854	0.859219	0.820059	0.908514	0.848678	0.972783	0.910264	0.845369	0.774776	0.99407	1.0169	1.00006	0.909985	0.994291	0.986591	0.999694	0.914422	0.942378	0.783187	1.02287	0.966156	0.0696761
SCFD1_HUMAN	1.03737	0.995838	1.00618	0.94414	0.993538	0.95679	1.02585	0.980413	0.970527	0.849292	1.13944	1.11244	0.891771	0.561441	0.997114	0.947894	1.00651	0.993747	1.08501	1.01836	1.14568	1.15306	0.137869
SCFD2_HUMAN	1.07993	1.07648	1.03986	1.15577	1.04426	0.939792	0.993907	0.982261	0.978009	1.24229	1.21185	1.22813	0.951822	0.943251	1.10645	1.18505	1.14119	1.11352	1.42434	1.12587	1.0416	1.07868	-0.254997
SCMC1_HUMAN	1.1725	1.12898	1.19943	1.10055	1.01986	1.16677	1.18049	1.03188	1.27104	1.10644	1.08034	0.937303	1.3704	1.72029	1.07607	0.996444	1.12832	0.976995	0.991886	1.13092	1.1515	1.19823	-0.230446
SCOT1_HUMAN	1.27319	1.39638	1.4035	1.35207	1.19131	1.33706	1.21057	1.17842	1.6667	0.860947	0.935291	1.35335	1.59462	2.68463	1.05116	1.00169	1.13524	0.962088	1.16785	1.35357	1.39267	1.31272	-0.363622
SCPDL_HUMAN	1.11668	1.0335	1.00629	0.988844	1.03744	1.08	1.05591	1.06148	1.04079	1.06239	1.00497	0.863109	1.14138	1.1489	1.08063	0.949805	1.05335	0.978966	0.976998	0.696799	0.984093	1.01494	0.241783
SCRB1_HUMAN	1.04115	1.07338	1.14323	1.16752	1.02751	0.95884	1.01791	0.998081	1.18436	1.00603	1.06537	1.03557	0.927375	0.761747	1.00491	0.806782	1.06248	1.20214	0.90425	0.793551	0.996518	1.06778	0.305823
SCRB2_HUMAN	0.936988	1.09381	1.02396	1.02432	0.903542	0.919003	0.98702	0.919912	0.999731	1.06079	1.08107	1.20347	1.51587	1.977	1.08172	1.02806	1.04296	1.00851	1.07826	1.05054	1.00851	1.0872	-0.487871
SCRIB_HUMAN	1.10608	1.21181	1.3137	1.21482	0.962375	1.06268	1.06299	0.991557	1.06091	0.966944	1.14668	0.968853	1.00073	0.707056	0.924465	1.00085	1.07117	0.886776	0.848157	0.597039	1.07777	1.0257	0.318391
SDC2_HUMAN	1.05077	1.1885	1.12614	1.2475	1.22623	1.13031	0.99923	1.22452	0.880117	0.788443	0.736024	0.719064	1.28506	0.547704	1.1726	1.00284	0.868607	1.03388	0.856301	0.553635	1.0688	1.1588	0.661474
SDCB1_HUMAN	1.10821	1.38342	1.15126	1.51908	1.15351	1.32885	0.961973	0.945526	1.43469	1.65664	1.33495	1.70119	1.34114	2.2173	1.03109	1.07747	1.06506	1.21629	1.28236	1.66265	1.00331	1.15469	-0.730984
SDF2L_HUMAN	0.871363	0.956867	0.867942	0.82167	1.02028	1.13212	0.992096	1.11631	0.835564	0.799119	0.999414	0.882303	1.45958	2.31694	1.0324	1.01136	1.08069	1.0179	1.21477	1.42171	1.05863	1.17149	-0.398158
SDHA_HUMAN	1.18513	1.26362	1.22256	1.20916	1.07782	1.14436	1.12771	1.11921	1.27029	1.28803	1.14212	1.21504	1.62399	2.28573	1.07444	0.978764	1.28938	1.02277	1.20201	1.20598	1.07282	1.16541	-0.465458
SDHB_HUMAN	1.38688	1.39831	1.15705	1.11821	1.12705	1.14056	1.31184	1.20648	1.23382	1.04582	1.00225	1.14978	1.58319	2.5381	1.11817	1.00174	1.25301	1.04902	0.767717	1.22059	1.06585	1.17711	-0.2772
SE1L1_HUMAN	1.06983	1.10949	1.13409	1.06064	0.960827	0.81289	0.867231	0.923291	1.106	1.03821	0.857017	0.995335	0.928832	1.22416	1.1604	0.972613	0.978542	1.09776	1.04243	0.741902	0.963946	0.860524	0.139342
SEC13_HUMAN	0.910993	0.963613	0.918706	0.830805	0.979556	1.0016	0.932566	0.985651	0.934724	0.997073	0.956828	1.21768	1.03125	1.37597	0.935778	0.996059	0.858761	0.913486	1.00654	1.25168	0.993455	0.945434	-0.690095
SEC63_HUMAN	1.1625	1.08947	0.987013	1.05355	0.993148	1.07609	1.02328	0.96703	1.14584	0.939723	0.959039	1.04639	1.10775	1.11715	1.03312	1.0008	1.0024	0.906239	0.95127	0.695557	0.779457	0.959671	0.073342
SELN_HUMAN	0.928161	0.823983	1.11436	0.750164	0.917582	0.711745	1.3842	1.08295	0.618017	0.954318	0.764195	0.605567	0.93664	0.853161	1.34273	0.962277	1.66723	1.18224	1.73873	1.37088	1.18366	1.1156	0.306929
SEP11_HUMAN	1.05751	0.953466	0.999095	1.01457	1.07047	0.977586	0.989302	0.980772	0.971508	0.974502	0.807708	0.825537	0.850858	0.737636	0.887965	0.966364	0.864539	0.971791	0.805811	0.946561	1.02943	0.957525	0.62717
SEP15_HUMAN	1.01546	1.18856	0.92028	0.998048	0.875527	0.829738	0.860341	0.907764	0.910007	1.13568	1.13482	1.47671	1.45719	1.86701	1.15901	1.08073	1.09447	0.936856	1.0715	1.28911	0.935358	1.12839	-0.594954
SEPT2_HUMAN	1.00801	0.956808	0.925838	0.927516	0.933434	0.91505	0.968323	0.907875	0.987033	0.930049	0.927371	0.936497	0.820628	0.721646	0.970547	0.982486	0.885008	0.946672	0.791234	0.86704	0.894139	0.931941	0.517578
SEPT7_HUMAN	0.887937	0.935635	0.960041	0.932141	1.04646	1.01022	1.05909	0.98075	0.884014	0.963227	0.977977	0.95035	0.866999	0.788627	0.961442	1.01102	0.826648	0.932627	0.828718	0.933059	0.942199	0.912924	0.211829
SEPT9_HUMAN	0.85469	0.931273	0.847928	0.977664	1.09399	1.02067	1.06614	0.946267	0.939371	0.882636	0.855004	0.930232	0.892925	0.966707	0.877636	0.994088	0.882113	0.985632	0.839547	0.959594	0.958279	1.00765	0.17791
SERA_HUMAN	0.920324	0.862407	0.970208	0.894785	0.973248	0.931043	0.971966	0.936933	1.06402	1.09294	1.08389	1.0048	0.852955	0.851978	0.917254	0.983304	0.855974	0.949943	0.772066	0.844642	0.929639	0.889951	-0.0774503
SERC_HUMAN	0.902318	0.862051	0.930233	0.890212	1.05682	0.989307	1.01648	0.964811	1.09435	1.04781	1.02818	0.863211	0.705441	0.471817	0.860411	0.997013	0.82859	0.917548	0.659931	0.592857	0.930621	0.899773	0.383547
SERPH_HUMAN	1.02551	1.08979	1.00009	1.06599	1.03985	1.12134	0.957037	1.00668	1.11527	1.22467	1.11461	1.3658	1.25526	1.74138	1.06384	1.007	1.09939	0.999302	1.54572	1.63383	1.07025	1.19366	-0.689756
SET_HUMAN	0.905848	0.866166	1.10572	0.936499	1.00442	1.04893	0.987186	0.994132	0.893796	0.787273	0.844616	0.668253	0.846241	0.73449	0.945715	0.939489	0.885571	0.955964	0.876468	1.12731	0.994912	1.03597	0.490722
SETD3_HUMAN	1.0346	0.922924	0.836959	0.768563	1.21983	0.874238	1.10351	1.02671	0.682977	0.809036	1.12263	0.904635	0.810271	0.58651	1.01048	1.12349	1.14349	1.38208	1.11124	1.1143	0.941849	0.965618	0.296828
SF01_HUMAN	0.892916	0.938749	0.906212	0.927779	1.01248	1.04149	0.98015	1.03808	0.846446	0.861388	0.834033	0.778107	1.04761	0.722536	0.915935	0.939093	1.01278	0.96756	1.26056	1.35288	0.929007	1.10581	0.198808
SF3A1_HUMAN	1.02368	1.0402	1.07914	1.06607	1.07484	1.12963	0.998342	1.09523	1.09285	0.977405	1.10369	1.04231	1.19744	1.26917	1.03591	0.985745	1.01589	0.962089	1.20243	1.26921	1.15207	1.21806	-0.466488
SF3A2_HUMAN	1.04048	1.03698	1.10927	1.15691	1.12497	1.03041	1.01492	1.13133	0.916541	0.994882	0.8711	1.02847	1.26515	1.23746	1.03947	1.03489	0.957755	1.02478	1.13897	1.21209	1.18124	1.15595	-0.103574
SF3A3_HUMAN	0.950868	1.00433	0.975512	0.990564	1.05044	1.14047	0.995834	1.07996	1.06297	1.01056	1.02364	1.05931	1.1416	1.08081	1.01612	0.972266	0.99436	0.981307	1.13471	1.17123	1.11623	1.1218	-0.386896
SF3B1_HUMAN	1.07539	1.0331	1.06741	1.05535	1.04881	1.11187	0.954663	1.01933	1.05057	0.975315	1.01386	0.936801	1.00821	0.883388	1.03036	0.989576	1.02198	0.956408	1.18921	0.880621	1.02313	0.949216	0.281653
SF3B2_HUMAN	1.02215	1.03496	1.0335	1.04703	1.05166	1.14274	0.924657	1.06979	1.0203	0.94289	0.974884	0.916783	1.1504	1.33864	1.05127	0.979308	1.02283	0.95203	1.18854	1.19904	1.16783	1.16314	-0.247712
SF3B3_HUMAN	0.980209	0.982375	0.960706	0.983902	1.02485	1.07165	0.933789	1.01337	1.03615	1.01394	1.04861	1.10557	1.20361	1.25169	1.03067	1.0255	1.02251	0.995546	1.18346	1.194	1.15143	1.2137	-0.502921
SF3B4_HUMAN	0.978602	1.10636	1.12555	1.10367	1.26722	1.31702	1.2523	1.30187	0.871914	1.29254	1.20895	1.43754	1.18418	1.01768	1.03386	0.937593	1.29428	1.02955	1.36203	1.66051	1.10757	1.03224	-0.471122
SF3B5_HUMAN	1.07696	0.989181	1.14391	0.990386	1.10096	1.15546	0.998857	1.12725	1.04012	0.982868	1.11348	1.03993	1.27855	1.31235	0.945731	1.02456	1.01945	0.908145	1.17856	1.22885	1.29283	1.26005	-0.400731
SF3B6_HUMAN	0.970009	1.05312	0.93536	0.990085	1.04304	1.14013	0.965678	1.03815	1.19304	1.08387	1.12573	1.19482	1.11749	1.18936	0.990029	0.966465	1.0761	1.03349	1.3101	1.50973	1.24086	1.222	-0.509775
SFPQ_HUMAN	1.00965	1.00341	1.02916	1.03463	1.10947	1.21677	0.977775	1.14419	1.10039	1.04934	1.06894	1.07568	1.28738	1.07222	1.02464	0.998189	1.076	0.969565	1.2696	1.41797	1.08625	1.11724	-0.327939
SFR15_HUMAN	0.896014	0.957141	0.999371	0.942023	1.02275	1.12535	0.941506	1.02734	1.11643	0.954464	0.797135	0.740302	1.00898	0.830614	0.999865	0.959033	0.994232	0.99611	1.23424	1.16873	1.11735	1.12655	0.388573
SFXN1_HUMAN	1.06368	1.03215	1.11198	1.0133	0.987828	1.1286	0.997212	0.985269	1.1366	0.987574	1.12193	0.980363	1.17969	1.2284	1.00222	0.981114	1.04889	0.985936	1.21096	1.06648	1.17292	1.17974	-0.325092
SFXN3_HUMAN	1.08434	1.11276	1.02473	1.03941	1.00384	1.05642	0.994143	1.00731	1.17925	1.10119	1.09102	0.998899	1.02542	1.06528	1.0462	1.00161	1.02361	0.944818	1.17412	1.11395	1.05034	1.14964	-0.19445
SGT1_HUMAN	0.915806	0.920147	1.04255	0.976307	1.04262	0.969476	0.987549	0.944929	0.929642	0.913536	0.882588	0.987376	0.697756	0.67043	0.942933	0.976805	0.825856	0.906323	0.845016	1.01268	0.950531	0.795849	0.2325
SGTA_HUMAN	0.955708	0.889576	1.00027	1.13952	0.949258	1.08138	0.977939	1.03557	0.862477	1.35465	1.26514	1.32423	0.871623	0.721798	0.985745	0.968988	0.925716	1.10806	1.10535	1.25156	0.922095	0.858035	-0.444
SH3K1_HUMAN	0.918666	0.874104	1.02265	0.90718	0.96854	0.921452	1.01224	0.948025	1.2011	1.15138	1.16901	1.3691	0.900602	0.92642	0.993157	0.96708	0.845169	1.01657	0.814279	1.18876	0.87686	0.800212	-0.478264
SH3L1_HUMAN	0.953789	0.903786	0.984016	0.93429	1.03783	0.953227	1.04532	0.933402	1.01993	0.901335	0.969802	0.876541	0.694469	0.388743	0.845109	0.9296	0.809918	0.927328	0.705539	0.774468	0.923015	0.808613	0.436279
SH3L3_HUMAN	0.719059	0.811866	0.775835	0.781827	0.902244	0.840225	0.97757	0.905771	1.07793	0.961236	0.972718	1.01206	0.635802	0.349545	0.894608	0.951772	0.77864	0.994157	0.675835	0.863317	0.944328	0.774951	0.242476
SHC1_HUMAN	0.929866	0.904394	1.06363	1.18734	0.838978	0.918039	1.10864	1.02009	1.33475	1.52721	1.28006	1.48286	0.88459	0.908337	1.11672	1.03987	0.931342	1.03366	0.988485	1.36998	0.919512	0.887848	-0.429954
SHIP1_HUMAN	0.934699	0.840649	0.905076	0.876723	0.942307	0.842632	0.950086	0.886273	0.810512	0.947054	0.923648	0.885821	0.763812	0.825106	0.935442	1.00613	0.87974	0.948767	0.66533	0.660531	0.904779	0.867275	0.346022
SHIP2_HUMAN	0.850765	0.797471	0.852568	0.899631	0.952347	0.821204	0.97544	0.819521	0.888753	1.10341	0.853682	0.841037	0.773316	0.862002	0.935045	0.980171	0.881278	0.961922	0.758115	0.780797	0.81469	0.796929	0.274352
SHLB1_HUMAN	0.9525	0.916781	0.996006	0.904551	0.968715	0.946344	0.927547	0.925293	1.06378	1.04562	1.15168	1.12242	0.850207	0.757697	0.961787	1.00125	0.824733	0.94259	0.840183	0.975797	0.900676	0.851261	-0.221418
SHPS1_HUMAN	1.07409	1.13675	1.18697	1.00117	1.14772	0.990836	0.990361	1.09515	1.12708	0.845005	1.02393	0.686681	0.896396	0.616198	0.979962	0.937	1.17775	1.11161	1.36769	0.849173	1.21235	1.06066	0.547427
SIAS_HUMAN	1.02701	1.01307	0.892664	0.959247	0.887689	0.934443	0.98062	1.05849	1.10152	0.835154	1.02199	0.92024	0.760866	0.491224	0.87355	0.976293	0.872858	0.939474	0.780047	0.888849	0.840133	0.82973	0.393789
SIL1_HUMAN	1.0495	0.971918	0.896178	0.92535	1.03281	0.914315	0.929454	0.961801	0.712441	0.650553	0.936272	0.98207	1.13747	1.73152	1.01855	0.990857	1.05333	1.04665	1.00145	0.790721	1.11027	1.09003	-0.220784
SIPA1_HUMAN	1.09676	1.05735	0.936161	1.13235	0.959408	0.9678	0.959483	1.07627	0.839271	0.821301	1.14917	1.12541	0.736377	0.658821	1.15411	1.16349	1.03618	0.998966	0.797193	0.5728	1.04674	0.661784	0.251124
SK2L2_HUMAN	1.03483	0.971364	1.0043	0.990448	1.05125	1.07608	1.03497	1.08633	1.00178	1.06178	1.07125	1.00456	0.918751	0.718758	1.0524	0.944438	1.02695	0.9842	1.08009	0.854566	1.01164	0.989642	0.267357
SKP1_HUMAN	0.88838	0.890388	0.853614	0.865073	1.03807	1.05381	1.04624	1.05905	1.16744	0.867009	0.953224	0.963591	0.900304	0.910143	1.15126	1.14724	0.879499	1.032	0.910547	0.906578	1.08514	1.00415	0.347611
SLAF8_HUMAN	1.10179	1.28552	1.12208	1.13922	1.36427	1.40996	1.3385	1.33858	1.51451	1.31546	1.27866	1.35917	1.14495	0.97439	0.994906	0.70944	1.14193	0.869599	1.61096	0.992884	1.04468	1.08187	-0.267099
SLIRP_HUMAN	1.18812	1.10116	1.07637	1.12948	1.16565	1.22665	1.08722	1.19818	1.17003	1.15342	1.15779	1.16774	1.5131	2.1252	1.15063	1.05044	1.17454	0.959754	1.078	0.836378	1.19536	1.18146	-0.387394
[truncated: 460 more rows]
